# Supplementary material
Source: PubMed Central journal article supplement (PMC2951454)
Supplement: 1002717107_Appendix.pdf [file 1002717107_Appendix.pdf]

**Supplementary Information**  
**'NonselF' sugar mimic of the HIV "glycan shield" shows enhanced**  
**antigenicity**

*Katie J. Doores,<sup>a,b,f,h</sup> Zara Fulton,<sup>c</sup> Vu Hong,<sup>d,e</sup> Mitul K. Patel,<sup>a</sup> Christopher N.  
Scanlan,<sup>g</sup> Mark R. Wormald,<sup>g</sup> M.G. Finn,<sup>d,e</sup> Dennis R. Burton,<sup>b,f,h</sup> Ian A. Wilson,<sup>c,e#</sup>  
and Benjamin G. Davis<sup>a#</sup>*

<sup>a</sup>Department of Chemistry, University of Oxford, Chemistry Research Laboratory,  
Mansfield Road, Oxford, UK, OX1 3TA.

Departments of <sup>b</sup>Immunology and Microbial Science, <sup>c</sup>Molecular Biology and  
<sup>d</sup>Chemistry, <sup>e</sup>The Skaggs Institute for Chemical Biology, <sup>f</sup>International AIDS Vaccine  
Initiative Neutralizing Antibody Center, The Scripps Research Institute, 10550 North  
Torrey Pines Road, La Jolla, California, USA, 92037;

<sup>g</sup>Glycobiology Institute, Department of Biochemistry, University of Oxford, South Parks  
Road, Oxford, UK, OX1 3QU;

<sup>h</sup>Ragon Institute of Massachusetts General Hospital, Massachusetts Institute of  
Technology, and Harvard, Boston, MA, 02114, USA.

<sup>#</sup>Corresponding Authors: Benjamin G. Davis; E-mail: [ben.davis@chem.ox.ac.uk](mailto:ben.davis@chem.ox.ac.uk); Ian A.  
Wilson; Email: [wilson@scripps.edu](mailto:wilson@scripps.edu)

## Contents

|                                                  |           |
|--------------------------------------------------|-----------|
| <b>1. Experimental</b>                           | <b>3</b>  |
| <b>1.1 C-5 substituted monomer synthesis</b>     | <b>3</b>  |
| <b>1.2 C-6 substituted monomer synthesis</b>     | <b>25</b> |
| <b>1.3 C-3 substituted monomer synthesis</b>     | <b>30</b> |
| <b>1.4 D-Rham monomer synthesis</b>              | <b>34</b> |
| <b>1.5 Tetrasaccharide synthesis</b>             | <b>37</b> |
| <b>1.6 Tetrasaccharide synthesis with linker</b> | <b>61</b> |
| <b>2. Modelling</b>                              | <b>79</b> |
| <b>3. Competition ELISAs</b>                     | <b>81</b> |
| <b>4. Protein conjugation</b>                    | <b>83</b> |
| <b>5. Serum Analysis</b>                         | <b>84</b> |
| <b>6. Crystallography</b>                        | <b>89</b> |
| <b>6. References</b>                             | <b>92</b> |
| <b>7. NMR spectra</b>                            | <b>94</b> |

## 1. Experimental:

## 1.1 C-5 substituted monomer synthesis

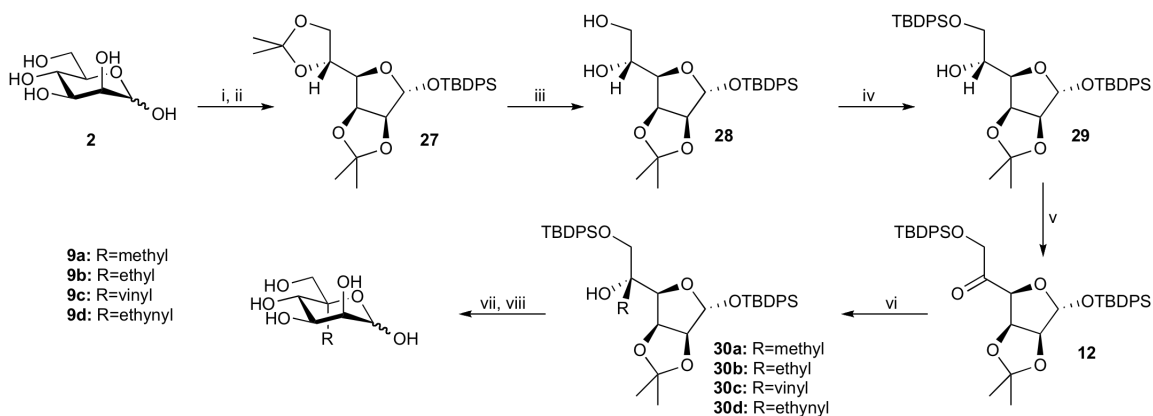

Scheme S1: i) 2,2-dimethyloxypropane, pTsOH, DMF, 73%, ii) TBDPSCl, Imidazole, DCM, 95%, iii) c.HCl, MeOH, 82%, iv) TBDPSCl, Imidazole, DMF, 79%, v) DMSO, C<sub>2</sub>O<sub>2</sub>Cl<sub>2</sub>, DCM, -78°C→RT, 97%, vi) RMgBr, THF, vii) TBAF, THF, viii) TFA, H<sub>2</sub>O.

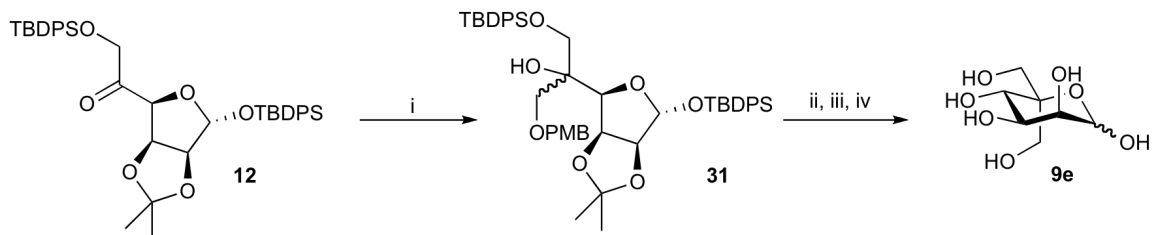

Scheme S2: i) Bu<sub>3</sub>SnCH<sub>2</sub>OPMB, BuLi, THF, 76%, ii) CAN, MeCN, H<sub>2</sub>O, 69%, iii) TBAF, THF, 94%, iv) TFA, H<sub>2</sub>O, 43%.

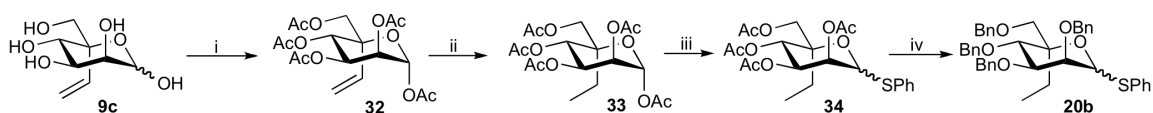

Scheme S3: i) Ac<sub>2</sub>O, Pyridine, ii) Thiophenol, BF<sub>3</sub>.OEt<sub>2</sub>, DCM, 0°C-RT, BnBr, NaH, DMF, iv) Pd/C, H<sub>2</sub>, EtOH.

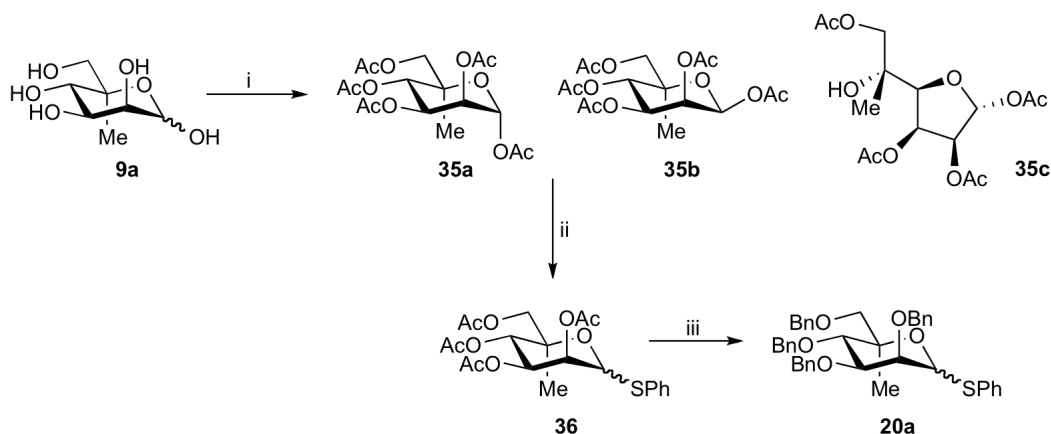

Scheme S4: i) Ac<sub>2</sub>O, Pyridine, ii) Thiophenol, BF<sub>3</sub>·OEt<sub>2</sub>, DCM, 0°C-RT, BnBr, NaH, DMF.

### ***tert*-Butyldiphenylsilyl 2,3:5,6-di-*O*-isopropylidene- $\alpha$ -D-mannofuranoside 27**

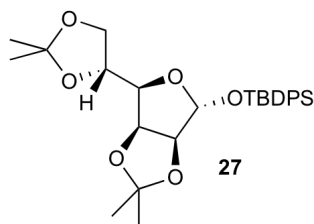

*tert*-Butyldiphenylchlorosilane (1.1 mL, 4.23 mmol) was added to a solution of 2,3:5,6-di-*O*-isopropylidene- $\alpha$ -D-mannofuranose (1)(1.0 g, 3.85 mmol) and imidazole (1.0 g, 15.4 mmol) in anhydrous DCM. After 16 h, t.l.c. (3:1, petrol:ethyl acetate) indicated formation of a product ( $R_f$  0.9) with complete consumption of the starting material ( $R_f$  0.2). The reaction mixture was concentrated *in vacuo* and diluted with diethyl ether (200 mL), washed with water (200 mL) and ammonium chloride (200 mL of an saturated aqueous solution). The organic phase was dried (MgSO<sub>4</sub>), filtered and concentrated *in vacuo*. The residue was purified by flash column chromatography (6:1, petrol:ethyl acetate) to afford *tert*-butyldiphenylsilyl 2,3:5,6-di-*O*-isopropylidene- $\alpha$ -D-mannofuranoside **27** (1.83 g, 95 %) as a colourless oil;  $[\alpha]_D^{19} +67.1$  (*c*, 2.0 in CHCl<sub>3</sub>);  $\nu_{\max}$  (thin film) no significant data to report;  $\delta_H$  (400 MHz, CDCl<sub>3</sub>) 1.12 (9H, s, C(CH<sub>3</sub>)<sub>3</sub>), 1.36, 1.42, 1.44, 1.50 (12H, 4 x s, 4 x Me), 3.88 (1H, dd,  $J_{5,6}$  4.7 Hz,  $J_{6,6'}$  8.7 Hz, H-6), 4.06 (1H, dd,  $J_{5,6'}$  6.3 Hz, H-6'), 4.23 (1H, dd,  $J_{3,4}$  3.6 Hz,  $J_{4,5}$  7.8 Hz, H-4), 4.40 (1H, ddd, H-5), 4.77 (1H, d,  $J_{2,3}$  5.8 Hz, H-2), 4.94 (1H, dd, H-3), 5.38 (1H, s, H-1);  $\delta_C$  (100 MHz, CDCl<sub>3</sub>) 19.3 (s, C(CH<sub>3</sub>)<sub>3</sub>), 24.6, 25.4, 25.9, 27.0 (4 x q, 4 x CH<sub>3</sub>), 26.8 (q, C(CH<sub>3</sub>)<sub>3</sub>), 66.9 (t, C-6), 73.1 (d, C-5), 79.7 (d, C-3), 80.6 (d, C-4), 87.1 (d, C-2), 101.8 (d,

C-1), 109.2, 112.6 (2 x s, 2 x  $\underline{C}(\text{CH}_3)_2$ ), 127.7, 129.9, 135.5 (3 x d, 3 x Ar-C), 133.5, 134.8 (2 x s, 2 x Ar-C);  $m/z$  (ESI<sup>+</sup>) 557 (M+MeCN+NH<sub>4</sub><sup>+</sup>, 100%); HRMS (ESI<sup>+</sup>) calcd. for C<sub>28</sub>H<sub>38</sub>O<sub>6</sub>SiNa (M+Na<sup>+</sup>) 521.2330. Found 521.2319.

***tert*-Butyldiphenylsilyl 2,3-*O*-isopropylidene- $\alpha$ -D-mannofuranoside **28****

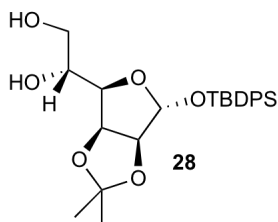

Concentrated hydrogen chloride (5 mL) was added to *tert*-butyldiphenylsilyl 2,3:5,6-di-*O*-isopropylidene- $\alpha$ -D-mannofuranoside **27** (11.4 g, 22.9 mmol) in methanol (25 mL). After 3 h, t.l.c (1:1, petrol:ethyl acetate) indicated formation of a product ( $R_f$  0.5) with complete consumption of the starting material ( $R_f$  0.9). Triethylamine (5 mL) was added to the reaction mixture and then concentrated *in vacuo*. The residue was purified by flash column chromatography (2:1, petrol:ethyl acetate) to afford *tert*-butyldiphenylsilyl 2,3-*O*-isopropylidene- $\alpha$ -D-mannofuranoside **28** (8.6 g, 82 %) as a colourless oil;  $[\alpha]_D^{19} +116.2$  (*c*, 2.0 in CHCl<sub>3</sub>);  $\nu_{\text{max}}$  (thin film) 3418 (br, OH) cm<sup>-1</sup>;  $\delta_H$  (400 MHz, CDCl<sub>3</sub>) 1.08 (9H, s, C(CH<sub>3</sub>)<sub>3</sub>), 1.34, 1.43 (6H, 2 x s, 2 x CH<sub>3</sub>), 2.36 (2H, bs, 2 x OH), 3.59 (1H, dd,  $J_{5,6}$  6.1 Hz,  $J_{6,6'}$  11.5 Hz, H-6), 3.75 (1H, dd,  $J_{5,6'}$  3.4 Hz, H-6'), 3.95 (1H, ddd,  $J_{4,5}$  8.5 Hz, H-5), 4.15 (1H, dd,  $J_{3,4}$  3.9 Hz, H-4), 4.74 (1H, dd,  $J_{2,3}$  5.9 Hz, H-2), 4.96 (1H, dd, H-3), 5.39 (1H, s, H-1), 7.37-7.68 (10H, m, Ar-H);  $\delta_C$  (100 MHz, CDCl<sub>3</sub>) 14.2 (s,  $\underline{C}(\text{CH}_3)_3$ ), 24.7, 25.9 (2 x q, 2 x CH<sub>3</sub>), 26.8 (q,  $\underline{C}(\text{CH}_3)_3$ ), 60.4 (t, C-6), 70.3 (d, C-5), 79.7 (d, C-4), 80.1 (d, C-3), 86.7 (d, C-2), 101.6 (d, C-1), 112.7 (s,  $\underline{C}(\text{CH}_3)_2$ ), 127.7, 129.9, 135.6 (3 x d, 3 x Ar-C), 132.9 (s, Ar-C);  $m/z$  (ESI<sup>+</sup>) 517 (M+MeCN+NH<sub>4</sub><sup>+</sup>, 100%); HRMS (ESI<sup>+</sup>) calcd. for C<sub>25</sub>H<sub>34</sub>O<sub>6</sub>SiNa (M+Na<sup>+</sup>) 481.2017. Found 481.2004.

***tert*-Butyldiphenylsilyl 2,3-*O*-isopropylidene-6-*O*-*tert*-butyldiphenylsilyl- $\alpha$ -D-mannofuranoside **29****

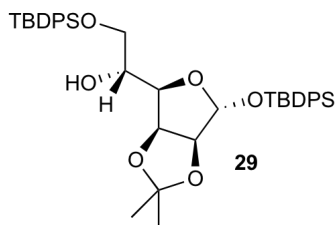

*tert*-Butyldiphenylchlorosilane (4.89 mL, 18.8 mmol) was added to a solution of *tert*-butyldiphenylsilyl 2,3-*O*-isopropylidene- $\alpha$ -D-mannofuranoside **28** (8.6 g, 18.8 mmol) and imidazole (5.0 g, 75.2 mmol) in anhydrous DMF. After 16 h, t.l.c. (3:1, petrol:ethyl acetate) indicated formation of a product ( $R_f$  0.9) with complete consumption of the starting material ( $R_f$  0.1). The reaction mixture was concentrated *in vacuo* and diluted with diethyl ether (300 mL), washed with water (300 mL) and ammonium chloride (300 mL of a saturated aqueous solution). The organic phase was dried ( $MgSO_4$ ), filtered and concentrated *in vacuo*. The residue was purified by flash column chromatography (6:1, petrol:ethyl acetate) to afford *tert*-butyldiphenylsilyl 2,3-*O*-isopropylidene-6-*O*-*tert*-butyldiphenylsilyl- $\alpha$ -D-mannofuranoside **29** (10.4 g, 79 %) as a colourless oil;  $[\alpha]_D^{19} +28.7$  (*c*, 1.0 in  $CHCl_3$ );  $\nu_{max}$  (thin film) 3444 (br, OH)  $cm^{-1}$ ;  $\delta_H$  (400 MHz,  $CDCl_3$ ) 1.03, 1.09 (18H, 2 x s, 2 x  $C(CH_3)_3$ ), 1.33, 1.41 (6H, 2 x s, 2 x Me), 2.94 (1H, bs, OH), 3.65 (1H, dd,  $J_{5,6}$  7.0 Hz,  $J_{6,6'}$  10.4 Hz, H-6), 3.84 (1H, dd,  $J_{5,6'}$  3.8 Hz, H-6'), 4.05 (1H, atd,  $J_d$  3.8 Hz,  $J_t$  7.1 Hz, H-5), 4.14 (1H, dd,  $J_{3,4}$  3.7 Hz,  $J_{4,5}$  8.0 Hz, H-4), 4.69 (1H, d,  $J_{2,3}$  5.8 Hz, H-2), 4.93 (1H, dd, H-3), 5.32 (1H, s, H-1), 7.19-7.70 (20H, m, 20 x Ar-H);  $\delta_C$  (100 MHz,  $CDCl_3$ ) 14.2 (s, 2 x  $C(CH_3)_3$ ), 24.7, 25.9 (q, 2 x Me), 26.7, 26.9 (2 x q, 2 x  $C(CH_3)_3$ ), 66.8 (t, C-6), 70.5 (d, C-5), 79.3 (d, C-4), 80.3 (d, C-3), 86.8 (d, C-2), 101.6 (d, C-1), 112.5 (s,  $C(CH_3)_2$ ), 127.6, 127.7, 129.7, 135.5, 135.6 (5 x d, Ar-C), 132.8, 133.1, 133.2, 133.3 (4 x s, Ar-C);  $m/z$  (ESI<sup>+</sup>) 755 (M+MeCN+NH<sub>4</sub><sup>+</sup>, 100%); HRMS (ESI<sup>+</sup>) calcd. for  $C_{41}H_{52}O_6Si_2Na$  (M+Na<sup>+</sup>) 719.3195. Found 719.3196.

***tert*-Butyldiphenylsilyl 2,3-*O*-isopropylidene-6-*O*-*tert*-butyldiphenylsilyl-5-*C*-keto- $\alpha$ -D-mannofuranoside **12****

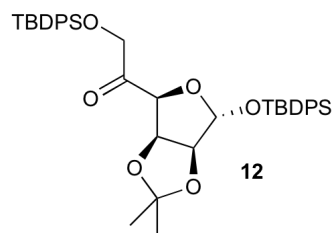

Dimethyl sulfoxide (624  $\mu\text{L}$ , 8.8 mmol) was added dropwise to a solution of oxalyl chloride (561  $\mu\text{L}$ , 4.4 mmol) in anhydrous DCM (10 mL) at  $-78\text{ }^\circ\text{C}$ . After 1 h, *tert*-butyldiphenylsilyl 2,3-*O*-isopropylidene-6-*O*-*tert*-butyldiphenylsilyl- $\alpha$ -D-mannofuranoside **29** (769 mg, 1.1 mmol) in anhydrous DCM (10 mL) was added dropwise to the reaction mixture. After 2 h, triethylamine (1.1 mL, 11.0 mmol) was added and the reaction mixture allowed to warm to room temperature. After 2 h, t.l.c (5:1, petrol:ethyl acetate) indicated formation of a product ( $R_f$  0.7) with consumption of the starting material ( $R_f$  0.6). Potassium hydrogensulfate (100 mL of a saturated aqueous solution) was added and the reaction mixture was extracted with DCM (3 x 100 mL). The combined organic layers were dried ( $\text{MgSO}_4$ ), filtered and concentrated *in vacuo*. The residue was purified by flash column chromatography (7:1, petrol:ethyl acetate) to afford *tert*-butyldiphenylsilyl 2,3-*O*-isopropylidene-6-*O*-*tert*-butyldiphenylsilyl-5-*C*-keto- $\alpha$ -D-mannofuranoside **12** (744 mg, 97 %) as a colourless oil;  $[\alpha]_D^{19} +4.9$  ( $c$ , 1.0 in  $\text{CHCl}_3$ );  $\nu_{\text{max}}$  (thin film) 1743 (s, C=O)  $\text{cm}^{-1}$ ;  $\delta_{\text{H}}$  (400 MHz,  $\text{CDCl}_3$ ) 1.07, 1.13 (18H, 2 x s, 2 x  $\text{C}(\text{CH}_3)_3$ ), 1.22, 1.26 (6H, 2 x s, 2 x Me), 4.38, 4.42 (2H, ABq,  $J$  18.3 Hz, H-6, H-6'), 4.67 (1H, d,  $J_{3,4}$  5.6 Hz, H-4), 5.03 (1H, d,  $J_{2,3}$  4.3 Hz, H-2), 5.57 (1H, dd, H-3), 5.47 (1H, s, H-1), 7.32-7.71 (20 H, m, 20 x Ar-H);  $\delta_{\text{C}}$  (100 MHz,  $\text{CDCl}_3$ ) 19.2, 19.3 (2 x s,  $\underline{\text{C}}(\text{CH}_3)_3$ ), 24.7, 25.6 (2 x q, 2 x Me), 26.6, 26.7 (2 x q, 2 x  $\underline{\text{C}}(\text{CH}_3)_3$ ), 69.0 (t, C-6), 80.6 (d, C-3), 84.3 (d, C-2), 86.0 (d, C-4), 101.3, (d, C-1), 113.1 (s,  $\underline{\text{C}}(\text{CH}_3)_2$ ), 127.8, 129.9, 135.5, 135.7 (4 x d, Ar-C), 132.5, 132.7 (2 x s, 2 x Ar-C), 203.7 (s, C=O);  $m/z$  ( $\text{ESI}^+$ ) 753 ( $\text{M}+\text{MeCN}+\text{NH}_4^+$ , 100%); HRMS ( $\text{ESI}^+$ ) calcd. for  $\text{C}_{41}\text{H}_{50}\text{O}_6\text{Si}_2\text{Na}$  ( $\text{M}+\text{Na}^+$ ) 717.3038. Found 717.3037.

***tert*-Butyldiphenylsilyl 2,3-*O*-isopropylidene-6-*O*-*tert*-butyldiphenylsilyl-5-*C*-methyl- $\alpha$ -D-mannofuranoside 30a**

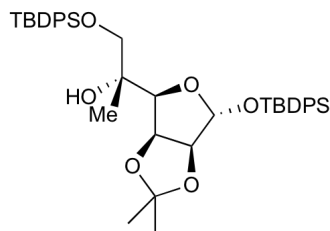

Methyl magnesium bromide (141  $\mu\text{L}$  of a 3M solution in THF, 0.43 mmol) was added to a solution of *tert*-butyldiphenylsilyl 2,3-*O*-isopropylidene-6-*O*-*tert*-butyldiphenylsilyl-5-*C*-keto- $\alpha$ -D-mannofuranoside **12** (59 mg, 0.085 mmol) in anhydrous THF (1 mL). After 1 h, ammonium chloride (1 mL of a saturated aqueous solution) was added followed by extraction with DCM (3 x 25 mL). The combined organic phases were washed with brine (25 mL of a saturated aqueous solution), dried ( $\text{MgSO}_4$ ), filtered and concentrated *in vacuo*. The residue was purified by flash column chromatography (8:1, petrol:ethyl acetate) to afford *tert*-butyldiphenylsilyl 2,3-*O*-isopropylidene-6-*O*-*tert*-butyldiphenylsilyl-5-*C*-methyl- $\alpha$ -D-mannofuranoside **30a** (56 mg, 93 %) as a colourless oil;  $[\alpha]_{\text{D}}^{19} +42.9$  (*c*, 1.0 in  $\text{CHCl}_3$ );  $\nu_{\text{max}}$  (thin film) 3508 (br, OH)  $\text{cm}^{-1}$ ;  $\delta_{\text{H}}$  (400 MHz,  $\text{CDCl}_3$ ) 1.11, 1.13 (18H, 2 x s, 2 x  $\text{C}(\text{CH}_3)_3$ ), 1.23, 1.35, 1.40 (9H, 3 x s, 3 x Me), 3.65, 3.80 (2H, ABq, *J* 10.0 Hz, H-6, H-6'), 4.53 (1H, d,  $J_{2,3}$  2.1 Hz, H-2), 4.64-4.66 (2H, m, H-3, H-4), 5.43 (1H, s, H-1), 7.35-7.74 (20 H, m, 20 x Ar-H);  $\delta_{\text{C}}$  (100 MHz,  $\text{CDCl}_3$ ) 19.3 (s,  $\text{C}(\text{CH}_3)_3$ ), 22.9, 24.0, 25.6 (3 x q, 3 x  $\text{CH}_3$ ), 26.7, 26.9 (q,  $\text{C}(\text{CH}_3)_3$ ), 70.2 (t, C-6), 73.8 (s, C-5), 80.2 (d, C-2), 80.7, 87.5 (2 x d, C-3, C-4), 100.5 (d, C-1), 112.5 (s,  $\text{C}(\text{CH}_3)_2$ ), 127.6, 127.7, 127.8, 129.8, 129.9, 134.8, 135.5, 135.8 (8 x d, Ar-C), 132.7, 133.2, 133.4 (s, Ar-C); *m/z* ( $\text{ESI}^+$ ) 769 ( $\text{M}+\text{MeCN}+\text{NH}_4^+$ , 100%); HRMS ( $\text{ESI}^+$ ) calcd. for  $\text{C}_{42}\text{H}_{54}\text{O}_6\text{Si}_2\text{Na}$  ( $\text{M}+\text{Na}^+$ ) 733.3351. Found 733.3349.

***tert*-butyldiphenylsilyl 2,3-*O*-isopropylidene-6-*O*-*tert*-butyldiphenylsilyl-5-*C*-ethyl- $\alpha$ -D-mannofuranoside **30b****

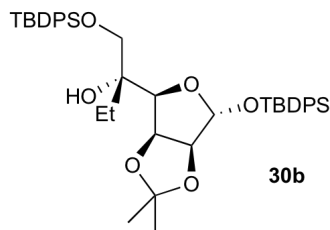



Ethyl magnesium bromide (110  $\mu\text{L}$  of a 3 M solution in THF, 0.33 mmol) was added to a solution of *tert*-butyldiphenylsilyl 2,3-*O*-isopropylidene-6-*O*-*tert*-butyldiphenylsilyl-5-*C*-keto- $\alpha$ -D-mannofuranoside **12** (50 mg, 0.065 mmol) in anhydrous THF. After 1 h, ammonium chloride (1 mL of a saturated aqueous solution) was added followed by extraction with DCM (3 x 25 mL). The combined organic phases were washed with brine (25 mL of a saturated aqueous solution), dried ( $\text{MgSO}_4$ ), filtered and concentrated *in vacuo*. The residue was purified by flash column chromatography (8:1, petrol:ethyl acetate) to afford *tert*-butyldiphenylsilyl 2,3-*O*-isopropylidene-6-*O*-*tert*-butyldiphenylsilyl-5-*C*-ethyl- $\alpha$ -D-mannofuranoside **30b** (51 mg, 99 %) as a colourless oil;  $[\alpha]_{\text{D}}^{19} +40.8$  (*c*, 1.0 in  $\text{CHCl}_3$ );  $\nu_{\text{max}}$  (thin film) 3507 (br, OH)  $\text{cm}^{-1}$ ;  $\delta_{\text{H}}$  (400 MHz,  $\text{CDCl}_3$ ) 0.89 (3H, t, *J* 7.6 Hz,  $\text{CH}_2\text{CH}_3$ ), 1.11, 1.13 (18H, 2 x s, 2 x  $\text{C}(\text{CH}_3)_3$ ), 1.19, 1.37 (6H, 2 x s, 2 x Me), 1.72-1.95 (2H, m,  $\text{CH}_2$ ), 3.69, 3.84 (2H, ABq, *J* 10.1 Hz, H-6, H-6'), 4.33 (1H, d,  $J_{2,3}$  2.7 Hz, H-2), 4.51 (1H, dd,  $J_{3,4}$  5.8 Hz, H-3), 4.60 (1H, d, H-4), 5.41 (1H, s, H-1), 7.36-7.74 (20H, m, 20 x Ar-H);  $\delta_{\text{C}}$  (100 MHz,  $\text{CDCl}_3$ ) 6.8 (q,  $\text{CH}_2\text{CH}_3$ ), 19.3 (s,  $\text{C}(\text{CH}_3)_3$ ), 23.9, 25.5 (2 x q, 2 x Me), 26.7, 27.0 (2 x q,  $\text{C}(\text{CH}_3)_3$ ), 27.4 (t,  $\text{CH}_2\text{CH}_3$ ), 65.8 (t, C-6), 75.1 (s, C-5), 80.1 (d, C-2), 80.8 (d, C-3), 87.3 (d, C-4), 100.4 (d, C-1), 112.4 (s,  $\text{C}(\text{CH}_3)_2$ ), 127.7, 127.8, 129.8, 135.5, 135.7, 135.8 (6 x d, Ar-C), 132.7, 133.2, 133.4 (3 x s, Ar-C); *m/z* ( $\text{ESI}^+$ ) 783 ( $\text{M}+\text{MeCN}+\text{NH}_4^+$ , 100%); HRMS ( $\text{ESI}^+$ ) calcd. for  $\text{C}_{43}\text{H}_{56}\text{O}_6\text{Si}_2\text{Na}$  ( $\text{M}+\text{Na}^+$ ) 747.3058. Found 747.3057.

***tert*-Butyldiphenylsilyl 2,3-*O*-isopropylidene-6-*O*-*tert*-butyldiphenylsilyl-5-*C*-vinyl- $\alpha$ -D-mannofuranoside **30c****

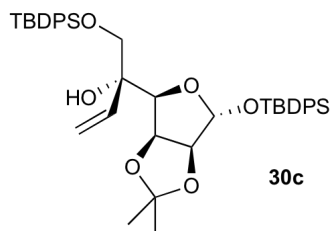

Vinyl magnesium bromide (330  $\mu\text{L}$  of a 1 M solution in THF, 0.33 mmol) was added to a solution of *tert*-butyldiphenylsilyl 2,3-*O*-isopropylidene-6-*O*-*tert*-butyldiphenylsilyl-5-*C*-keto- $\alpha$ -D-mannofuranoside **12** (50 mg, 0.063 mmol) in anhydrous THF. After 1 h, ammonium chloride (1 mL of a saturated aqueous solution) was added followed by

extraction with DCM (3 x 25 mL). The combined organic phases were washed with brine (25 mL of a saturated aqueous solution), dried (MgSO<sub>4</sub>), filtered and concentrated *in vacuo*. The residue was purified by flash column chromatography (8:1, petrol:ethyl acetate) to afford *tert*-butyldiphenylsilyl 2,3-*O*-isopropylidene-6-*O*-*tert*-butyldiphenylsilyl-5-*C*-vinyl- $\alpha$ -D-mannofuranoside **30c** (42 mg, 81 %) as a colourless oil;  $[\alpha]_D^{19} +41.7$  (*c*, 1.0 in CHCl<sub>3</sub>);  $\nu_{\max}$  (thin film) 3508 (br, OH), 3072 (w, C=C) cm<sup>-1</sup>;  $\delta_H$  (400 MHz, CDCl<sub>3</sub>) 1.09, 1.11 (18H, 2 x s, 2 x C(CH<sub>3</sub>)<sub>3</sub>), 1.22, 1.38 (6H, 2 x s, 2 x Me), 3.75, 3.84 (2H, ABq, *J* 9.8 Hz, H-6, H-6'), 4.48 (1H, d, *J*<sub>2,3</sub> 3.1 Hz, H-2), 4.63 (1H, d, *J*<sub>3,4</sub> 5.7 Hz, H-4), 4.68 (1H, dd, H-3), 5.23 (1H, d, *J* 10.9 Hz, C=CH), 5.40 (1H, s, H-1), 4.58 (1H, d, *J* 17.3 Hz, C=CH), 6.05 (1H, dd, C=CH), 7.34-7.74 (20H, m, 20 x Ar-H);  $\delta_C$  (100 MHz, CDCl<sub>3</sub>) 19.3 (s, C(CH<sub>3</sub>)<sub>3</sub>), 24.0, 25.5 (2 x q, 2 x CH<sub>3</sub>), 26.8, 26.9 (2 x q, 2 x C(CH<sub>3</sub>)<sub>3</sub>), 69.7 (t, C-6), 75.6 (s, C-5), 79.7 (d, C-2), 80.6 (d, C-3), 87.2 (d, C-4), 100.5 (d, C-1), 112.6 (s, C(CH<sub>3</sub>)<sub>2</sub>), 114.4 (t, CH<sub>2</sub>=CH), 127.7, 127.8, 129.8, 135.7, 135.8, 135.9 (6 x d, Ar-C), 132.6, 133.1, 133.2, 133.3 (4 x s, Ar-C), 139.1 (d, CH<sub>2</sub>=CH); *m/z* (ESI<sup>+</sup>) 781 (M+MeCN+NH<sub>4</sub><sup>+</sup>, 100%); HRMS (ESI<sup>+</sup>) calcd. for C<sub>43</sub>H<sub>54</sub>O<sub>6</sub>Si<sub>2</sub>Na (M+Na<sup>+</sup>) 745.3351. Found 745.3353.

***tert*-Butyldiphenylsilyl 2,3-*O*-isopropylidene-6-*O*-*tert*-butyldiphenylsilyl-5-*C*-ethynyl- $\alpha$ -D-mannofuranoside **30d****

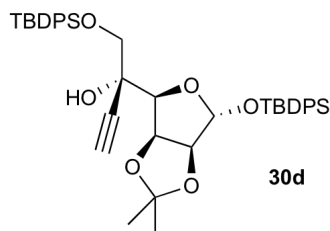

Ethynyl magnesium bromide (2.62 mL of a 0.5 M solution in THF, 1.31 mmol) was added to a solution of *tert*-butyldiphenylsilyl 2,3-*O*-isopropylidene-6-*O*-*tert*-butyldiphenylsilyl-5-*C*-keto- $\alpha$ -D-mannofuranoside **12** (200 mg, 0.26 mmol) in anhydrous THF (2 mL). After 1 h, ammonium chloride (5 mL of a saturated aqueous solution) was added followed by extraction with DCM (3 x 50 mL). The combined organic phases were washed with brine (50 mL of a saturated aqueous solution), dried (MgSO<sub>4</sub>), filtered and concentrated *in vacuo*. The residue was purified by flash column chromatography (8:1,

petrol:ethyl acetate) to afford *tert*-butyldiphenylsilyl 2,3-*O*-isopropylidene-6-*O*-*tert*-butyldiphenylsilyl-5-*C*-ethynyl- $\alpha$ -D-mannofuranoside **30d** (180 mg, 86 %) as a colourless oil;  $[\alpha]_D^{18} +25.1$  (*c*, 1.0 in CHCl<sub>3</sub>);  $\nu_{\max}$  (thin film) 3455 (br, OH) cm<sup>-1</sup>;  $\delta_H$  (400 MHz, CDCl<sub>3</sub>) 1.10, 1.13 (18H, 2 x s, 2 x C(CH<sub>3</sub>)<sub>3</sub>), 1.27, 1.40 (6H, 2 x s, 2 x Me), 2.51 (1H, s, CH), 3.94, 3.98 (2H, ABq, *J* 10.0 Hz, H-6, H-6'), 4.60 (1H, d, *J*<sub>2,3</sub> 3.5 Hz, H-2), 4.70 (1H, d, *J*<sub>3,4</sub> 5.8 Hz, H-4), 4.85 (1H, dd, H-3), 5.45 (1H, s, H-1), 7.26-7.84 (20H, m, 20 x Ar-H);  $\delta_C$  (100 MHz, CDCl<sub>3</sub>) 19.2, 19.4 (2 x s, 2 x C(CH<sub>3</sub>)<sub>3</sub>), 24.1, 25.4 (2 x q, 2 x Me), 26.6, 26.8 (2 x q, 2 x C(CH<sub>3</sub>)<sub>3</sub>), 69.2 (t, C-6), 72.9 (s, C-5), 73.8 (d, C≡CH), 77.0 (s, C≡CH), 80.1 (d, C-2), 80.4 (d, C-3), 87.2 (d, C-4), 100.7 (d, C-1), 112.9 (s, C(CH<sub>3</sub>)<sub>2</sub>), 127.6, 127.7, 127.8, 129.6, 129.8, 135.4, 135.6, 135.9, 136.0 (9 x d, Ar-C), 132.4, 132.7, 132.9, 133.1, 134.8 (5 x s, Ar-C); *m/z* (ESI<sup>+</sup>) 779 (M+MeCN+NH<sub>4</sub><sup>+</sup>, 100%); HRMS (ESI<sup>+</sup>) calcd. for C<sub>43</sub>H<sub>56</sub>O<sub>6</sub>Si<sub>2</sub>N (M+NH<sub>4</sub><sup>+</sup>) 738.3641. Found 738.3635.

### 5-*C*-Methyl-D-mannopyranose **9a**

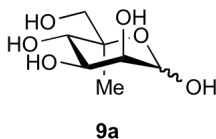

Tetrabutyl ammonium fluoride (879  $\mu$ L of a 1 M solution in THF) was added to *tert*-butyldiphenylsilyl 2,3-*O*-isopropylidene-6-*O*-*tert*-butyldiphenylsilyl-5-*C*-methyl- $\alpha$ -D-mannofuranoside **30a** (150 mg, 0.21 mmol) in THF (3 mL). After 30 min, t.l.c (1:1, petrol:ethyl acetate) indicated formation of a product (*R<sub>f</sub>* 0.2) with consumption of the starting material (*R<sub>f</sub>* 0.9). The reaction was concentrated *in vacuo* and the residue purified by flash column chromatography (1:1, petrol:ethyl acetate) to afford 2,3-*O*-isopropylidene-5-*C*-methyl- $\alpha$ -D-mannofuranose (47 mg, 95 %) as a colourless oil. Trifluoroacetic acid (1 mL) was added to 2,3-*O*-isopropylidene-5-*C*-methyl- $\alpha$ -D-mannofuranose (47 mg, 0.18 mmol) in water (2 mL) and the reaction mixture stirred. After 18 h, t.l.c (9:1, ethyl acetate:methanol) indicated formation of a product (*R<sub>f</sub>* 0.0) with consumption of the starting material (*R<sub>f</sub>* 0.3). The reaction mixture was concentrated *in vacuo* and co-evaporated with toluene (3 x 20 mL). The residue was purified by reverse phase flash chromatography (C-18, water) to afford 5-*C*-Methyl-D-mannopyranose **9a** (18 mg, 51 %) as a colourless oil;  $\delta_H$  (500 MHz, D<sub>2</sub>O) 1.08 (3H, s,

Me $\beta$ ), 1.18 (3H, s, Me $\alpha$ ), 3.42, 3.52 (2H, ABq,  $J$  12.0 Hz, H-6 $\beta$ , H-6' $\beta$ ), 3.46, 3.51, (2H, ABq,  $J$  12.0 Hz, H-6 $\alpha$ , H-6' $\alpha$ ), 3.63 (1H, d,  $J_{3,4}$  10.2 Hz, H-4 $\alpha$ ), 3.77 (1H, dd,  $J_{2,3}$  3.3 Hz, H-3 $\alpha$ ), 3.80 (1H, d,  $J_{3,4}$  9.6 Hz, H-4 $\beta$ ), 3.83 (1H, dd,  $J_{1,2}$  2.4 Hz,  $J_{2,3}$  3.3 Hz, H-2 $\beta$ ), 3.84 (1H, dd,  $J_{1,2}$  1.0 Hz, H-2 $\alpha$ ), 3.99 (1H, dd, H-3 $\beta$ ), 4.97 (1H, d, H-1 $\alpha$ ), 5.10 (1H, d, H-1 $\beta$ );  $\delta_C$  (125 MHz, D<sub>2</sub>O) 13.1 (q, Me $\beta$ ), 18.5 (q, Me $\alpha$ ), 66.2 (t, C-6 $\beta$ ), 66.6 (t, C-6 $\alpha$ ), 67.2 (d, C-3 $\beta$ ), 67.4 (d, C-4 $\alpha$ ), 68.0 (d, C-4 $\beta$ ), 69.8 (d, C-3 $\alpha$ ), 70.8 (d, C-2 $\beta$ ), 71.5 (d, C-2 $\alpha$ ), 77.1 (s, C-5 $\alpha$ ), 79.5 (d, C-5 $\beta$ ), 89.4 (d, C-1 $\alpha$ ), 94.8 (d, C-1 $\beta$ );  $m/z$  (ESI<sup>+</sup>) 217 (M+Na<sup>+</sup>, 100%); HRMS (ESI<sup>+</sup>) calcd. for C<sub>7</sub>H<sub>14</sub>O<sub>6</sub>Na (M+Na<sup>+</sup>) 217.0683. Found 217.0684.

### 5-C-Ethyl-D-mannopyranose **9b**

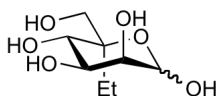

**9b**

Tetrabutyl ammonium fluoride (840  $\mu$ L of a 1 M solution in THF) was added to *tert*-butyldiphenylsilyl 2,3-*O*-isopropylidene-6-*O*-*tert*-butyldiphenylsilyl-5-*C*-ethyl- $\alpha$ -D-mannofuranoside **30b** (200 mg, 0.28 mmol) in THF (3 mL). After 30 min, t.l.c (1:1, petrol:ethyl acetate) indicated formation of a product ( $R_f$  0.2) with consumption of the starting material ( $R_f$  0.9). The reaction was concentrated *in vacuo* and the residue purified by flash column chromatography (1:1, petrol:ethyl acetate) to afford 2,3-*O*-isopropylidene-5-*C*-ethyl- $\alpha$ -D-mannofuranose (55 mg, 80 %) as a colourless oil. Trifluoroacetic acid (1 mL) was added to 2,3-*O*-isopropylidene-5-*C*-ethyl- $\alpha$ -D-mannofuranose (55 mg, 0.22 mmol) in water (2 mL) and the reaction mixture stirred. After 18 h, t.l.c (9:1, ethyl acetate:methanol) indicated formation of a product ( $R_f$  0.0) with consumption of the starting material ( $R_f$  0.3). The reaction mixture was concentrated *in vacuo* and co-evaporated with toluene (3 x 20 mL). The residue was purified by reverse phase flash chromatography (C-18, water) to afford 5-*C*-ethyl-D-mannopyranose **9b** (30 mg, 66 %) as a colourless oil;  $\delta_H$  (500 MHz, D<sub>2</sub>O) 0.77-0.83 (9H, m, 3 x CH<sub>3</sub>), 1.37-1.83 (6H, m, 3 x CH<sub>2</sub>), 3.50, 3.62 (2H, ABq,  $J$  12.0 Hz, H-6a, H-6'a), 3.54, 3.66 (2H, ABq,  $J$  12.3 Hz, H-6b, H-6'b), 3.61 (2H, d,  $J$  17.5 Hz, H-6c, H-6'c), 3.77 (1H, at,  $J$  3.5 Hz, H-2b), 3.79 (1H, dd,  $J_{2,3}$  3.4 Hz,  $J_{3,4}$  10.4 Hz, H-3a), 3.84 (1H dd,  $J_{1,2}$  1.2 Hz, H-2a), 3.88 (1H, dd,  $J_{3,4}$  8.6 Hz,  $J_{2,3}$  3.5 Hz, H-3b), 3.90 (1H, d, H-4a), 3.92 (1H, d, H-4b),

3.99 (1H, dd,  $J_{1,2}$  5.5 Hz,  $J_{2,3}$  4.3 Hz, H-2c), 4.12 (1H, d,  $J_{3,4}$  2.8 Hz, H-4c), 4.30 (1H, dd,  $J_{3,4}$  2.8 Hz,  $J_{2,3}$  4.3 Hz, H-3c), 4.90 (1H, d, H-1a), 5.08 (1H, d,  $J_{1,2}$  3.5 Hz, H-1b), 5.22 (1H, d,  $J_{1,2}$  5.5 Hz, H-1c);  $\delta_C$  (125 MHz, D<sub>2</sub>O) 5.8 (q, CH<sub>3</sub>a), 6.60 (q, CH<sub>3</sub>b, CH<sub>3</sub>c), 18.6 (t, CH<sub>2</sub>a), 23.5 (t, CH<sub>2</sub>b), 26.2 (t, CH<sub>2</sub>c), 62.0 (t, C-6b), 62.5 (t, C-6c), 63.5 (t, C-6a), 67.7 (d, C-4a), 68.0 (d, C-4b), 69.7 (d, C-3a), 70.7 (d, C-3b), 71.4 (d, C-2a), 71.8 (d, C-3c), 72.4 (d, C-2b), 76.6 (s, C-5c), 77.8 (d, C-2c), 78.3 (s, C-5a), 79.2 (d, C-4c), 81.7 (s, C-5b), 89.0 (d, C-1a), 93.7 (d, C-1b), 100.3 (d, C-1c);  $m/z$  (ESI<sup>+</sup>) 231 (M+Na<sup>+</sup>, 100%); HRMS (ESI<sup>+</sup>) calcd. for C<sub>8</sub>H<sub>16</sub>O<sub>6</sub>Na (M+Na<sup>+</sup>) 231.0839. Found 231.0839.

### 5-C-Vinyl-D-mannopyranose **9c**

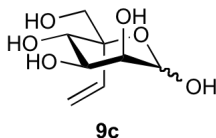

Tetrabutyl ammonium fluoride (690  $\mu$ L of a 1 M solution in THF) was added to *tert*-butyldiphenylsilyl 2,3-*O*-isopropylidene-6-*O*-*tert*-butyldiphenylsilyl-5-*C*-vinyl- $\alpha$ -D-mannofuranoside **30c** (170 mg, 0.23 mmol) in THF (3 mL). After 30 min, t.l.c (1:1, petrol:ethyl acetate) indicated formation of a product ( $R_f$  0.2) with consumption of the starting material ( $R_f$  0.9). The reaction was concentrated *in vacuo* and the residue purified by flash column chromatography (1:1, petrol:ethyl acetate) to afford 2,3-*O*-isopropylidene-5-*C*-vinyl- $\alpha$ -D-mannofuranose (47 mg, 82 %) as a colourless oil. Trifluoroacetic acid (1 mL) was added to 2,3-*O*-isopropylidene-5-*C*-vinyl- $\alpha$ -D-mannofuranose (47 mg, 0.19 mmol) in water (2 mL) and the reaction mixture stirred. After 18 h, t.l.c (9:1, ethyl acetate:methanol) indicated formation of a product ( $R_f$  0.0) with consumption of the starting material ( $R_f$  0.3). The reaction mixture was concentrated *in vacuo* and co-evaporated with toluene (3 x 20 mL). The residue was purified by RP flash chromatography (C-18, water) to afford 5-*C*-vinyl-D-mannopyranoside **9c** (20 mg, 51%) as a colourless oil;  $\delta_H$  (400 MHz, D<sub>2</sub>O) 3.35, 3.52 (2H, ABq,  $J$  12.2 Hz, H-6, H-6'), 3.53 (1H, dd,  $J_{2,3}$  2.9 Hz,  $J_{3,4}$  10.5 Hz, H-3), 3.78 (1H, d, H-2), 3.83 (1H, d, H-4), 3.95 (1H, s, H-1), 5.33 (1H, d,  $J$  17.8 Hz,  $\underline{\text{C}}\text{H}\text{H}'=\text{CH}$ ), 5.40 (1H, d,  $J$  11.3 Hz,  $\text{C}\text{H}\underline{\text{H}}=\text{CH}$ ), 5.83 (1H, dd, CH<sub>2</sub>=CH);  $\delta_C$  (100 MHz, D<sub>2</sub>O) 65.9 (t, C-6), 67.3 (d, C-4), 70.5 (d, C-3), 72.1 (d, C-2), 80.0 (s, C-5), 89.7 (d, C-1), 119.1 (t,  $\underline{\text{C}}\text{H}_2=\text{CH}$ ), 131.0 (d, CH<sub>2</sub>= $\underline{\text{C}}\text{H}$ );  $m/z$

(ESI) 205 (M-H<sup>+</sup>, 100%); HRMS (ESI) calcd. for C<sub>8</sub>H<sub>13</sub>O<sub>6</sub> (M-H<sup>+</sup>) 205.0707. Found 205.0709.

### 5-C-Ethynyl- $\alpha$ -D-mannopyranose **9d**

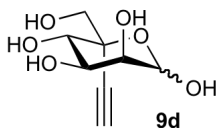

Tetrabutyl ammonium fluoride (800  $\mu$ L of a 1 M solution in THF) was added to *tert*-butyldiphenylsilyl 2,3-*O*-isopropylidene-6-*O*-*tert*-butyldiphenylsilyl-5-*C*-ethynyl- $\alpha$ -D-mannofuranoside **30d** (180 mg, 0.22 mmol) in THF (3 mL). After 30 min, t.l.c (1:1, petrol:ethyl acetate) indicated formation of a product ( $R_f$  0.1) with consumption of the starting material ( $R_f$  0.9). The reaction was concentrated *in vacuo* and the residue purified by flash column chromatography (1:1, petrol:ethyl acetate) to afford 2,3-*O*-isopropylidene-5-*C*-ethynyl- $\alpha$ -D-mannofuranose (53 mg, 99 %) as a colourless oil. Trifluoroacetic acid (1 mL) was added to 2,3-*O*-isopropylidene-5-*C*-ethynyl- $\alpha$ -D-mannofuranose (53 mg, 0.22 mmol) in water (2 mL) and the reaction mixture stirred. After 18 h, t.l.c (9:1, ethyl acetate:methanol) indicated formation of a product ( $R_f$  0.0) with consumption of the starting material ( $R_f$  0.3). The reaction mixture was concentrated *in vacuo* and co-evaporated with toluene (3 x 20 mL). The residue was purified by reverse phase flash chromatography (C-18, water) to afford 5-*C*-ethynyl- $\alpha$ -D-mannopyranose **9d** (30 mg, 66 %) as a colourless oil;  $\delta_H$  (400 MHz, D<sub>2</sub>O) 2.94 (1H, s, CH), 3.59 (1H, d,  $J_{3,4}$  10.0 Hz, H-4), 3.65, 3.73 (2H, ABq,  $J$  12.0 Hz, H-6, H-6'), 3.82 (1H, dd,  $J_{2,3}$  3.3 Hz, H-3), 3.87 (1H, dd,  $J_{1,2}$  1.1 Hz, H-2), 5.18 (1H, d, H-1);  $\delta_C$  (100 MHz, D<sub>2</sub>O) 65.7 (t, C-6), 67.5 (d, C-4), 70.8 (d, C-3), 71.4 (d, C-2), 76.2 (s, C-5), 78.1 (s, C $\equiv$ CH), 79.6 (d, C $\equiv$ CH), 91.9 (d, C-1);  $m/z$  (ESI) 203 (M-H<sup>+</sup>, 100%); HRMS (ESI) calcd. for C<sub>8</sub>H<sub>11</sub>O<sub>6</sub> (M-H<sup>+</sup>) 203.0550. Found 203.0560.

### *tert*-Butyldiphenylsilyl 2,3-*O*-isopropylidene-6-*O*-*tert*-butyldiphenylsilyl-6'-*O*-*para*-methoxybenzyl-5-*C*-hydroxymethyl- $\alpha$ -D-mannofuranoside **31**

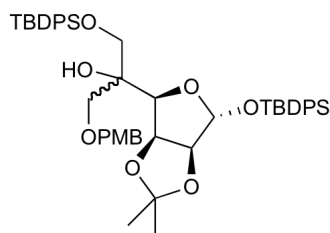

Butyl lithium (1.14 mL of a 1.6 M solution in hexane) was added to a solution of (*para*-methoxybenzyloxymethyl)tri-*n*-butylstannane (2-4)(0.97 mL, 2.20 mmol) in anhydrous THF (3 mL) at -78 °C. A yellow colour change was observed. After 30 min, *tert*-butyldiphenylsilyl 2,3-*O*-isopropylidene-6-*O*-*tert*-butyldiphenylsilyl-5-*C*-keto- $\alpha$ -D-mannofuranoside **12** (561 mg, 0.73 mmol) in anhydrous THF (3 mL) was added dropwise. After 1 h, t.l.c (5:1, petrol:ethyl acetate) indicated formation of a product ( $R_f$  0.5) with consumption of the starting material ( $R_f$  0.6). Ammonium chloride (5 mL of a saturated aqueous solution) was added followed by extraction with DCM (3 x 50 mL). The combined organic phases were washed with brine (50 mL of a saturated aqueous solution), dried (MgSO<sub>4</sub>), filtered and concentrated *in vacuo*. The residue was purified by flash column chromatography (8:1, petrol:ethyl acetate) to afford *tert*-butyldiphenylsilyl 2,3-*O*-isopropylidene-6-*O*-*tert*-butyldiphenylsilyl-6'-*O*-*para*-methoxybenzyl-5-*C*-hydroxymethyl- $\alpha$ -D-mannofuranoside **31** as a mixture of diastereomers (469 mg, 76 %) as a colourless oil.

Minor diastereomer:

$[\alpha]_D^{18} +41.5$  (*c*, 1.0 in CHCl<sub>3</sub>);  $\nu_{\max}$  (thin film) 3509 (br, OH) cm<sup>-1</sup>;  $\delta_H$  (400 MHz, CDCl<sub>3</sub>) 1.07, 1.09 (6H, 2 x s, 2 x CH<sub>3</sub>), 1.19, 1.37 (18H, 2 x s, 2 x C(CH<sub>3</sub>)<sub>3</sub>), 3.62, 3.68 (2H, ABq, *J* 9.5 Hz, H-6, H-6'), 3.74 (1H, d, *J* 9.9 Hz, CHH'), 3.81 (3H, s, OMe), 4.18 (1H, d, CHH'), 4.34 (1H, d, *J*<sub>2,3</sub> 2.0 Hz, H-2), 4.47, 4.55 (2H, ABq, *J* 11.7 Hz, CH<sub>2</sub>), 4.61 (2H, as, H-3, H-4), 5.40 (1H, s, H-1), 6.63 (2H, d, *J* 8.7 Hz, 2 x Ar-H<sub>PMB</sub>), 7.23 (2H, d, 2 x Ar-H<sub>PMB</sub>), 7.31-7.72 (20H, m, 20 x Ar-H);  $\delta_C$  (100 MHz, CDCl<sub>3</sub>) 19.2, 19.3 (2 x s, 2 x C(CH<sub>3</sub>)<sub>3</sub>), 24.0, 25.5 (2 x q, 2 x Me), 26.7, 26.9 (2 x q, 2 x C(CH<sub>3</sub>)<sub>3</sub>), 55.3 (q, OMe), 60.0 (t, CH<sub>2</sub>), 71.2 (t, C-6), 73.3 (t, CH<sub>2</sub>), 75.7 (s, C-5), 77.8 (d, C-2), 81.0, 87.1 (2 x d, C-3, C-4), 100.7 (d, C-1), 112.5 (s, C(CH<sub>3</sub>)<sub>2</sub>), 113.6, 129.3 (2 x d, 2 x Ar-C<sub>PMB</sub>), 127.7, 127.8, 129.7, 129.8, 135.5, 135.7 (6 x d, Ar-C), 130.8, 132.7, 133.2, 133.5 158.9 (5 x s, Ar-C);

$m/z$  (ESI<sup>+</sup>) 905 (M+MeCN+NH<sub>4</sub><sup>+</sup>, 100%); HRMS (ESI<sup>+</sup>) calcd. for C<sub>50</sub>H<sub>62</sub>O<sub>8</sub>Si<sub>2</sub>Na (M+Na<sup>+</sup>) 869.3875. Found 869.3873.

Major diastereomer:

$[\alpha]_D^{18}$  +25.2 (*c*, 1.0 in CHCl<sub>3</sub>);  $\nu_{\max}$  (thin film) 3509 (br, OH) cm<sup>-1</sup>;  $\delta_H$  (400 MHz, CDCl<sub>3</sub>) 1.00, 1.08 (6H, 2 x s, 2 x CH<sub>3</sub>), 1.26, 1.39 (18H, 2 x s, 2 x C(CH<sub>3</sub>)<sub>3</sub>), 3.68 (1H, d, *J* 9.1 Hz, CHH'), 3.81, 3.90 (2H, ABq, *J* 10.2 Hz, H-6, H-6'), 3.83 (3H, s, OMe), 3.98 (1H, d, CHH'), 4.33 (1H, d, *J*<sub>2,3</sub> 3.2 Hz, H-2), 4.50, 4.59 (2H, ABq, *J* 11.5 Hz, CH<sub>2</sub>), 4.63 (1H, d, *J*<sub>3,4</sub> 5.8 Hz, H-4), 4.90 (1H, dd, H-3), 5.36 (1H, s, H-1), 6.89 (2H, d, *J* 8.7 Hz, 2 x Ar-H<sub>PMB</sub>), 7.14-7.72 (22H, m, 22 x Ar-H);  $\delta_C$  (100 MHz, CDCl<sub>3</sub>) 19.1, 19.4 (2 x s, 2 x C(CH<sub>3</sub>)<sub>3</sub>), 24.1, 25.7 (2 x q, 2 x Me), 26.8, 26.9 (2 x q, 2 x C(CH<sub>3</sub>)<sub>3</sub>), 55.3 (q, OMe), 65.8 (t, CH<sub>2</sub>), 71.1 (t, C-6), 73.2 (t, CH<sub>2</sub>), 75.5 (s, C-5), 78.5 (d, C-2), 81.2 (d, C-3), 87.0 (d, C-4), 100.1 (d, C-1), 112.5 (s, C(CH<sub>3</sub>)<sub>2</sub>), 113.7, 129.1 (d, 2 x Ar-C<sub>PMB</sub>), 127.6, 127.7, 127.8, 129.5, 129.8, 133.5, 133.7 (7 x d, Ar-C), 130.6, 132.8, 133.1, 133.5, 133.7, 159.1 (6 x s, Ar-C);  $m/z$  (ESI<sup>+</sup>) 905 (M+MeCN+NH<sub>4</sub><sup>+</sup>, 100%); HRMS (ESI<sup>+</sup>) calcd. for C<sub>50</sub>H<sub>62</sub>O<sub>8</sub>Si<sub>2</sub>Na (M+Na<sup>+</sup>) 869.3875. Found 869.3873.

### 5-C-Hydroxymethyl- $\alpha$ -D-mannopyranose 9e

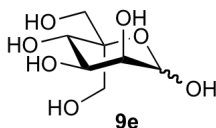

*tert*-Butyldiphenylsilyl 2,3-*O*-isopropylidene-6-*O*-*tert*-butyldiphenylsilyl-6'-*O*-*para*-methoxybenzyl-5-*C*-hydroxymethyl- $\alpha$ -D-mannofuranoside **31** (460 mg, 0.54 mmol) and ammonium cerium nitrate (596 mg, 1.09 mmol) were stirred in acetonitrile and water (5 ml of a 9:1 mixture). After 30 min, t.l.c (5:1, petrol:ethyl acetate) indicated formation of a product (*R*<sub>f</sub> 0.4) with consumption of the starting material (*R*<sub>f</sub> 0.5). The reaction mixture was diluted with DCM (100 mL) and washed with sodium thiosulfate (100 mL of a 0.1 M solution). The aqueous layer was extracted with DCM (2 x 50 mL) and the combined organic layers washed with EDTA (100 mL of a 0.05 M solution), dried (MgSO<sub>4</sub>), filtered and concentrated *in vacuo*. The residue was purified by flash column chromatography (8:1, petrol:ethyl acetate) to afford *tert*-butyldiphenylsilyl 2,3-*O*-



isopropylidene-6-*O*-*tert*-butyldiphenylsilyl-5-*C*-hydroxymethyl- $\alpha$ -D-mannofuranoside (270 mg, 69 %) as a colourless oil.

Tetrabutyl ammonium fluoride (500  $\mu$ L of a 1 M solution in THF) was added to *tert*-butyldiphenylsilyl 2,3-*O*-isopropylidene-6-*O*-*tert*-butyldiphenylsilyl-5-*C*-hydroxymethyl- $\alpha$ -D-mannofuranoside (170 mg, 0.23 mmol) in THF (2 mL). After 30 min, t.l.c (ethyl acetate) indicated formation of a product ( $R_f$  0.2) with consumption of the starting material ( $R_f$  0.9). The reaction was concentrated *in vacuo* and the residue purified by flash column chromatography (ethyl acetate) to afford 2,3-*O*-isopropylidene-5-*C*-hydroxymethyl- $\alpha$ -D-mannofuranose (54 mg, 94 %) as a colourless oil.

Trifluoroacetic acid (1 mL) was added to 2,3-*O*-isopropylidene-5-*C*-hydroxymethyl- $\alpha$ -D-mannofuranose (54 mg, 0.22 mmol) in water (2 mL) and the reaction mixture stirred. After 18 h, t.l.c (9:1, ethyl acetate:methanol) indicated formation of a product ( $R_f$  0.0) with consumption of the starting material ( $R_f$  0.3). The reaction mixture was concentrated *in vacuo* and co-evaporated with toluene (3 x 20 mL). The residue was purified by RP flash chromatography (C-18, water) to afford 5-*C*-hydroxymethyl- $\alpha$ -D-mannopyranose **9e** (20 mg, 43 %) as a colourless oil; major structure:  $\delta_H$  (500 MHz, D<sub>2</sub>O) 3.58-3.68 (4H, m, 2 x CH<sub>2</sub>), 3.81 (1H, dd,  $J_{1,2}$  1.0 Hz,  $J_{2,3}$  3.3 Hz, H-2), 3.93 (1H, d,  $J_{3,4}$  9.1 Hz, H-4), 4.04 (1H, dd, H-3), 5.07 (1H, d H-1);  $\delta_C$  (125 MHz, D<sub>2</sub>O) 61.6, 62.3 (2 x t, 2 x CH<sub>2</sub>), 67.2 (d, C-4), 67.4 (d, C-3), 70.1 (d, C-2), 80.4 (s, C-5), 89.6 (d, C-1);  $m/z$  (ESI) 233 (M-H<sup>+</sup>, 100%); HRMS (ESI) calcd. for C<sub>7</sub>H<sub>14</sub>O<sub>7</sub> (M-H<sup>+</sup>) 233.0631. Found 233.0631.

### 1,2,3,4,6-Penta-*O*-acetyl-5-*C*-vinyl- $\alpha$ -D-mannopyranose **32**

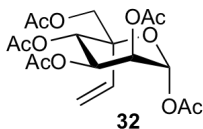

5-*C*-Vinyl- $\alpha$ -D-mannopyranose **9c** (152 mg, 0.74 mmol) was stirred in acetic anhydride (5 mL) and pyridine (10 mL). After 18 h, t.l.c (1:1, petrol:ethyl acetate) indicated formation of a product ( $R_f$  0.5) with consumption of the starting material ( $R_f$  0.0). The reaction mixture was concentrated *in vacuo* and coevaporated with toluene. The residue was purified by flash column chromatography (1:1, petrol:ethyl acetate) to afford 1,2,3,4,6-penta-*O*-acetyl-5-*C*-vinyl- $\alpha$ -D-mannopyranose **32** (247 mg, 80%) as a

colourless oil;  $[\alpha]_D^{19}$  -105.5 (*c*, 1.0 in CHCl<sub>3</sub>);  $\nu_{\max}$  (thin film) 1752 (s, C=O) cm<sup>-1</sup>;  $\delta_H$  (400 MHz, CDCl<sub>3</sub>) 1.99, 2.06, 2.10, 2.22 (15H, 4 x s, 5 x OAc), 3.79, 4.19 (2H, ABq, *J* 12.4 Hz, H-6, H-6'), 5.07 (1H, dd, *J*<sub>2,3</sub> 3.1 Hz, *J*<sub>3,4</sub> 10.8 Hz, H-3), 5.44 (1H, dd, *J*<sub>1,2</sub> 1.4 Hz, H-2), 5.63 (1H, d, H-4), 5.65 (1H, dd, *J* 3.4 Hz, *J* 8.5 Hz, CH=CHH'), 5.93-5.96 (2H, m, CH=CHH'), 6.06 (1H, d, H-1);  $\delta_C$  (100 MHz, CDCl<sub>3</sub>), 20.5, 20.7, 20.8 (3 x q, 5 x OAc), 65.4 (t, C-6), 65.6 (d, C-4), 68.7 (d, C-2), 68.9 (d, C-3), 78.6 (s, C-5), 86.6 (d, C-1), 122.5 (t, CH=CH<sub>2</sub>), 129.1 (d, CH=CH<sub>2</sub>), 168.6, 169.3, 169.8, 170.2, 170.5 (5 x s, 5 x C=O); *m/z* (ESI<sup>+</sup>) 475 (M+MeCN+NH<sub>4</sub><sup>+</sup>, 100%); HRMS (ESI<sup>+</sup>) calcd. for C<sub>18</sub>H<sub>24</sub>O<sub>11</sub>Na (M+Na<sup>+</sup>) 439.1211. Found 439.1212.

**1,2,3,4,6-Penta-*O*-acetyl-5-*C*-methyl- $\alpha$ -D-mannopyranose 35a, 1,2,3,4,6-Penta-*O*-acetyl-5-*C*-methyl- $\beta$ -D-mannopyranose 35b and 1,2,3,6-tetra-*O*-acetyl-5-*C*-methyl- $\alpha$ -D-mannofuranoside 35c**

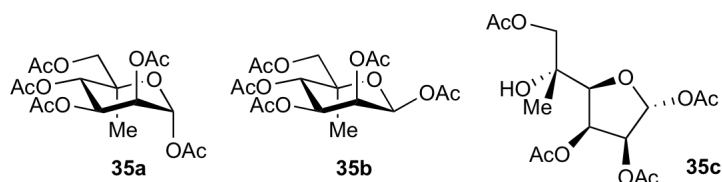

5-*C*-Methyl- $\alpha$ -D-mannopyranose **9a** (41 mg, 0.21 mmol) was stirred in acetic anhydride (5 mL) and pyridine (10 mL). After 18 h, t.l.c (1:1, petrol:ethyl acetate) indicated formation of a product (*R<sub>f</sub>* 0.5) with consumption of the starting material (*R<sub>f</sub>* 0.0). The reaction mixture was concentrated *in vacuo* and coevaporated with toluene. The residue was purified by flash column chromatography to afford an inseparable mixture of 1,2,3,4,6-penta-*O*-acetyl-5-*C*-methyl- $\alpha$ -D-mannopyranose **35a**, 1,2,3,4,6-penta-*O*-acetyl-5-*C*-methyl- $\beta$ -D-mannopyranose **35b** and 1,2,3,6-tetra-*O*-acetyl-5-*C*-methyl- $\alpha$ -D-mannofuranoside **35c** (67 mg, 79%, 33:17:50) as a colourless oil;  $\delta_H$  (400 MHz, CDCl<sub>3</sub>) 1.33, (3H, s, CH<sub>3</sub>-c), 1.38 (3H, s, CH<sub>3</sub>- $\beta$ ), 1.39 (3H, s, CH<sub>3</sub>- $\alpha$ ), 2.00, 2.01, 2.04, 2.05, 2.09, 2.10, 2.13, 2.14, 2.16, 2.18, 2.20 (42H, 12 x s, 14 x OAc), 3.55, 4.34 (2H, ABq, *J* 7.7 Hz, H-6c, H-6'c), 3.95, 3.99 (2H, Abq, *J* 11.9 Hz, H-6 $\beta$ , H-6' $\beta$ ), 3.98, 4.09 (2H, ABq, *J* 12.0 Hz, H-6 $\alpha$ , H-6' $\alpha$ ), 4.89 (1H, d, *J*<sub>3,4</sub> 1.8 Hz, H-4c), 4.98 (1H, dd, *J*<sub>2,3</sub> 5.6 Hz, H-3c), 5.20 (1H, d, H-2c), 5.19-5.27 (2H, m, H-2 $\beta$ , H-3 $\alpha$ ), 5.40 (1H, s, H-1c), 5.46 (1H, d, *J*<sub>3,4</sub> 10.3 Hz, H-4 $\alpha$ ), 5.45-5.50 (2H, m, H-2 $\alpha$ , H-3 $\beta$ ), 5.56 (1H, d, *J*<sub>3,4</sub> 10.5 Hz, H-4 $\beta$ ),

6.05 (1H, d,  $J_{1,2}$  1.4 Hz, H-1 $\alpha$ ), 6.09 (1H, d,  $J_{1,2}$  2.2 Hz, H-1 $\beta$ );  $\delta_C$  (100 MHz, CDCl<sub>3</sub>) 14.9 (q, CH<sub>3</sub>- $\alpha$ ), 17.9 (q, CH<sub>3</sub>-c), 19.2 (q, CH<sub>3</sub>- $\beta$ ), 20.5, 20.6, 20.7, 20.7, 20.8, 20.8, 21.1 (7 x q, 14 x OAc), 68.2, 68.4 (2 x d, H-2 $\beta$ , H-4 $\beta$ ), 66.5 (d, H-3 $\alpha$ ), 66.7 (d, C-3c), 67.2 (t, C-6 $\alpha$ ), 67.2 (t, C-6 $\beta$ ), 67.9 (d, C-2c), 68.3, 68.4 (2 x d, C-2 $\alpha$ , C-4 $\alpha$ ), 68.9 (d, C-3 $\beta$ ), 71.1 (t, C-6c), 73.0 (d, C-4c), 76.0 (s, C-5 $\alpha$ ), 78.2 (s, C-5 $\beta$ ), 79.6 (s, C-5c), 86.8 (d, C-1 $\alpha$ ), 91.0 (d, C-1 $\beta$ ), 100.4 (d, C-1c), 168.3, 168.6, 169.4, 169.6, 169.7, 169.9, 170.0, 170.2, 170.5, 170.6 (s, 14 x C=O).

### 1,2,3,4,6-Penta-*O*-acetyl-5-*C*-ethyl- $\alpha$ -D-mannopyranose **33**

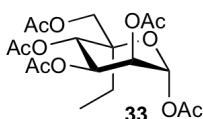

Palladium on carbon (30 mg) was added to a solution of 1,2,3,4,6-penta-*O*-acetyl-5-*C*-vinyl- $\alpha$ -D-mannopyranose **32** (72 mg, 0.17 mmol) in ethanol (3 mL). The flask was evacuated and refilled with hydrogen five times and the reaction mixture stirred under an atmosphere of hydrogen. After 1 h the reaction mixture was filtered through celite<sup>®</sup> and concentrated *in vacuo* to afford 1,2,3,4,6-penta-*O*-acetyl-5-*C*-ethyl- $\alpha$ -D-mannopyranose **33** (72 mg, 100 %) as a colourless oil;  $[\alpha]_D^{21}$  -45.1 (c, 1.0 in CHCl<sub>3</sub>);  $\nu_{\max}$  (thin film) 1750 (s, C=O) cm<sup>-1</sup>;  $\delta_H$  (400 MHz, CDCl<sub>3</sub>) 0.99 (3H, t,  $J$  7.3 Hz, CH<sub>3</sub>), 1.65-1.74 (2H, m, CH<sub>2</sub>), 1.98, 2.02, 2.08, 2.09, 2.19 (15H, 5 x s, 5 x OAc), 4.05, 4.11 (2H, ABq,  $J$  12.0 Hz, H-6, H-6'), 5.25 (1H, dd,  $J_{2,3}$  3.3 Hz,  $J_{3,4}$  10.4 Hz, H-3), 5.43 (1H, dd,  $J_{1,2}$  1.4 Hz, H-2), 5.58 (1H, d, H-4), 5.99 (1H, d, H-1);  $\delta_C$  (100 MHz, CDCl<sub>3</sub>) 6.05 (q, CH<sub>3</sub>), 20.5 (t, CH<sub>2</sub>), 20.6, 20.7, 20.7, 20.8, 20.8 (5 x q, 5 x OAc), 64.9 (t, C-6), 67.1 (d, C-4), 68.2 (d, C-3), 68.4 (d, C-2), 77.7 (s, C-5), 86.2 (d, C-1), 168.6, 169.3, 169.9, 170.2, 170.5 (5 x s, 5 x C=O);  $m/z$  (ESI<sup>+</sup>) 477 (M+MeCN+NH<sub>4</sub><sup>+</sup>, 100%); HRMS (ESI<sup>+</sup>) calcd. for C<sub>18</sub>H<sub>26</sub>O<sub>11</sub>Na (M+Na<sup>+</sup>) 441.1373. Found 441.1372.

### Phenyl 2,3,4,6-tetra-*O*-acetyl-5-*C*-ethyl-1-thio- $\alpha$ -D-mannopyranoside **34a** and Phenyl 2,3,4,6-tetra-*O*-acetyl-5-*C*-ethyl-1-thio- $\beta$ -D-mannopyranoside **34b**

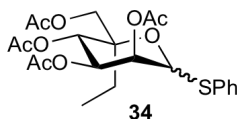

Boron trifluoroetherate (71  $\mu\text{L}$ , 0.56 mmol) was added dropwise to a solution of 1,2,3,4,6-penta-*O*-acetyl-5-*C*-ethyl- $\alpha$ -D-mannopyranose **33** (68 mg, 0.16 mmol) and thiophenol (71  $\mu\text{L}$ , 0.56 mmol) in anhydrous DCM (1 mL) at 0°C. The reaction mixture was allowed to warm to room temperature and stirred under an atmosphere of argon. After 5 h, t.l.c (1:1, petrol:ethyl acetate) indicated formation of a product ( $R_f$  0.6) with complete consumption of the starting material ( $R_f$  0.5). The reaction mixture was quenched with triethylamine (100  $\mu\text{L}$ ), diluted with DCM and washed with sodium hydrogencarbonate (50 mL of a saturated aqueous solution). The aqueous phase was extracted with DCM (3 x 30 mL) and the combined organic phases were dried ( $\text{MgSO}_4$ ), filtered and concentrated *in vacuo*. The residue was purified by flash column chromatography (3:1, petrol:ethyl acetate) to afford phenyl 2,3,4,6-tetra-*O*-acetyl-5-*C*-ethyl-1-thio- $\alpha$ -D-mannopyranoside **34a** and phenyl 2,3,4,6-tetra-*O*-acetyl-5-*C*-ethyl-1-thio- $\beta$ -D-mannopyranoside **34b** (73 mg, 97 %) as a colourless oil; (2:1,  $\alpha$ : $\beta$ ).

$\alpha$ :  $[\alpha]_D^{22}$  -84.2 (*c*, 1.0 in  $\text{CHCl}_3$ );  $\nu_{\text{max}}$  (thin film) 1750 (s, C=O)  $\text{cm}^{-1}$ ;  $\delta_{\text{H}}$  (400 MHz,  $\text{CDCl}_3$ ) 0.52 (3H, t,  $J$  7.5 Hz,  $\text{CH}_3$ ), 1.55-1.84 (2H, m,  $\text{CH}_2$ ), 1.97, 2.00, 2.11, 2.19 (12H, 4 x s, 4 x OAc), 4.07, 4.10 (2H, ABq,  $J$  12.0 Hz, H-6, H-6'), 4.90 (1H, d,  $J_{1,2}$  1.2 Hz, H-1), 5.17 (1H, d,  $J_{2,3}$  3.5 Hz,  $J_{3,4}$  10.7 Hz, H-3), 5.59 (1H, d, H-4), 5.63 (1H, dd, H-2), 7.29-7.60 (5H, m, 5 x Ar-H);  $\delta_{\text{C}}$  (100 MHz,  $\text{CDCl}_3$ ) 5.6 (q,  $\text{CH}_3$ ), 19.2 (t,  $\text{CH}_2$ ), 20.6, 20.7, 20.8, 21.0 (4 x q, 4 x OAc), 65.4 (t, C-6), 67.5 (d, C-4), 69.1 (d, C-3), 70.9 (d, C-2), 78.9 (s, C-5), 80.8 (d, C-1), 128.9, 129.0, 1234.6 (d, Ar-C), 132.2 (s, Ar-C), 169.4, 170.2, 170.3, 170.6 (4 x s, 4 x C=O);  $m/z$  (ESI<sup>+</sup>) 527 (M+MeCN+NH<sub>4</sub><sup>+</sup>, 100%); HRMS (ESI<sup>+</sup>) calcd. for  $\text{C}_{22}\text{H}_{28}\text{O}_9\text{SNa}$  (M+Na<sup>+</sup>) 491.1344. Found 491.1346.

$\beta$ :  $[\alpha]_D^{22}$  -4.0 (*c*, 1.0 in  $\text{CHCl}_3$ );  $\nu_{\text{max}}$  (thin film) 1750 (s, C=O)  $\text{cm}^{-1}$ ;  $\delta_{\text{H}}$  (400 MHz,  $\text{CDCl}_3$ ) 0.88 (3H, t,  $J$  7.5 Hz,  $\text{CH}_3$ ), 1.58-1.74 (2H, m,  $\text{CH}_2$ ), 2.05, 2.07, 2.10, 2.12 (12H, 4 x s, 4 x OAc), 4.28, 4.41 (2H, ABq,  $J$  12.0 Hz, H-6, H-6'), 5.19-5.22 (2H, m, H-2, H-4), 5.30 (1H, d,  $J_{1,2}$  4.1 Hz, H-1), 5.38 (1H, dd,  $J_{2,3}$  3.5 Hz,  $J_{3,4}$  5.6 Hz, H-3), 7.30-7.61 (5H, m, 5 x Ar-H);  $\delta_{\text{C}}$  (100 MHz,  $\text{CDCl}_3$ ) 7.2 (q,  $\text{CH}_3$ ), 20.7, 20.8 (2 x q, 4 x OAc), 25.3 (t,  $\text{CH}_2$ ), 61.2 (t, C-6), 67.2 (d, C-3), 67.9 (d, C-2), 67.9 (d, C-4), 79.5 (s, C-5), 80.5 (d, C-1),

128.0, 128.9 (d, Ar-C), 132.5 (s, Ar-C), 169.2, 169.4, 169.4, 170.4 (4 x s, 4 x C=O);  $m/z$  (ESI<sup>+</sup>) 527 (M+MeCN+NH<sub>4</sub><sup>+</sup>, 100%); HRMS (ESI<sup>+</sup>) calcd. for C<sub>22</sub>H<sub>28</sub>O<sub>9</sub>SNa (M+Na<sup>+</sup>) 491.1344. Found 491.1346.

### Phenyl 2,3,4,6-tetra-*O*-acetyl-5-*C*-methyl-1-thio- $\alpha$ -D-mannopyranoside **36**

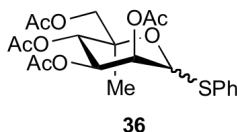

Boron trifluoroetherate (280  $\mu$ L, 2.21 mmol) was added dropwise to a solution of 1,2,3,4,6-penta-*O*-acetyl-5-*C*-methyl-D-mannopyranose **35a**, **35b**, **35c** (253 mg, 0.63 mmol) and thiophenol (193  $\mu$ L, 1.88 mmol) in anhydrous DCM (4 mL) at 0°C. The reaction mixture was allowed to warm to room temperature and stirred under an atmosphere of argon. After 1.5 h, t.l.c (1:1, petrol:ethyl acetate) indicated formation of a product ( $R_f$  0.7) with complete consumption of the starting material ( $R_f$  0.5). The reaction mixture was quenched with triethylamine (500  $\mu$ L), diluted with DCM and washed with sodium hydrogencarbonate (100 mL of a saturated aqueous solution). The aqueous phase was extracted with DCM (3 x 50 mL) and the combined organic phases were dried (MgSO<sub>4</sub>), filtered and concentrated *in vacuo*. The residue was purified by flash column chromatography (3:1, petrol:ethyl acetate) to afford phenyl 2,3,4,6-tetra-*O*-acetyl-5-*C*-methyl-1-thio-D-mannopyranoside **36** as a mixture of anomers (143 mg, 50%,  $\alpha$ : $\beta$ , 2:1) as a colourless oil and recovered furanose sugar (114 mg, 50%);  $\nu_{\max}$  (thin film) 1750 (s, C=O) cm<sup>-1</sup>;  $\delta_H$  (500 MHz, CDCl<sub>3</sub>) 1.28 (3H, s, Me $\alpha$ ), 1.42 (3H, s, Me $\beta$ ), 1.98, 2.04, 2.07, 2.08, 2.11, 2.13, 2.19 (24H, 7 x s, 8 x OAc), 4.05, 4.13 (2H, ABq,  $J$  11.8 Hz, H-6 $\alpha$ , H-6' $\alpha$ ), 4.16, 2.38 (2H, ABq,  $J$  11.8 Hz, H-6 $\beta$ , H-6' $\beta$ ), 5.09 (1H, d,  $J_{1,2}$  1.2 Hz, H-1 $\alpha$ ), 5.17 (1H, dd,  $J_{2,3}$  3.5 Hz,  $J_{3,4}$  10.7 Hz, H-3 $\alpha$ ), 5.28-5.30 (2H, m, H-3 $\beta$ , H-4 $\beta$ ), 5.33 (1H, d,  $J_{1,2}$  6.5 Hz, H-1 $\beta$ ), 5.44 (1H, dd,  $J_{2,3}$  3.3 Hz, H-2 $\beta$ ), 5.47 (1H, d, H-4 $\alpha$ ), 5.64 (1H, dd, H-2 $\alpha$ );  $\delta_C$  (125 MHz, CDCl<sub>3</sub>) 14.1 (q, Me $\alpha$ , Me $\beta$ ), 20.2, 20.6, 20.6, 20.7, 20.7, 20.8 (q, 8 x OAc), 65.4 (t, C-6 $\beta$ ), 66.6 (d, C-4 $\alpha$ ), 67.2 (d, C-2 $\beta$ ), 67.8 (t, C-6 $\alpha$ ), 67.9, 68.6 (2 x d, C-3 $\beta$ , C-4 $\beta$ ), 69.2 (d, C-3 $\alpha$ ), 71.1 (d, C-2 $\alpha$ ), 77.5 (s, C-5 $\alpha$ ), 77.9 (s, C-5 $\beta$ ), 80.6 (d, C-1 $\alpha$ ), 81.5 (d, C-1 $\beta$ ), 128.0, 129.0, 129.2, 131.5, 131.9, 132.4 (d, Ar-C), 132.8, 133.5 (s, Ar-C),

169.4, 169.5, 170.2, 170.4, 170.6 (s, 8 x C=O);  $m/z$  (ESI<sup>+</sup>) 477 (M+Na<sup>+</sup>, 100%); HRMS (ESI<sup>+</sup>) calcd. for C<sub>21</sub>H<sub>26</sub>O<sub>9</sub>SNa (M+Na<sup>+</sup>) 477.1190. Found 477.1190.

### Phenyl 2,3,4,6-tetra-*O*-benzyl-5-*C*-ethyl-1-thio- $\alpha$ -D-mannopyranoside **20b**

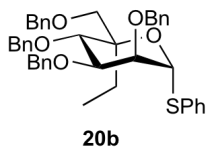

Sodium methoxide (0.5 mL of a 0.1 M solution in methanol) was added to a solution of phenyl 2,3,4,6-tetra-*O*-acetyl-5-*C*-ethyl-1-thio- $\alpha$ -D-mannopyranoside **34** (102 mg, 0.22 mmol) in methanol (2 mL). After 30 min, t.l.c (1:1, petrol:ethyl acetate) indicated formation of a product ( $R_f$  0) with consumption of the starting material ( $R_f$  0.7). The reaction mixture was neutralised with DOWEX<sup>®</sup>, filtered and concentrated *in vacuo*. The residue was suspended in anhydrous DMF (2 mL) and sodium hydride (53 mg, 1.32 mmol of 60% in mineral oil) added. Benzyl bromide (116  $\mu$ L, 0.97 mmol) was added dropwise and the reaction mixture stirred under an atmosphere of argon. After 18 h, t.l.c (3:1, petrol:ethyl acetate) indicated formation of a product ( $R_f$  0.9) with consumption of the starting material ( $R_f$  0). The reaction mixture was quenched with methanol (1 mL) and concentrated *in vacuo*. The residue was resuspended in diethyl ether (20 mL) and washed with water (20 mL). The aqueous layer was re-extracted with diethyl ether (2 x 20 mL) and the combined organic layers were dried (MgSO<sub>4</sub>), filtered and concentrated *in vacuo*. The residue was purified by flash column chromatography (3:1, petrol:ethyl acetate) to afford phenyl 2,3,4,6-tetra-*O*-benzyl-5-*C*-ethyl-1-thio- $\alpha$ -D-mannopyranoside **20b** (100 mg, 69 %) as a colourless oil;  $[\alpha]_D^{22}$  -33.0 ( $c$ , 1.0 in CHCl<sub>3</sub>);  $\nu_{\max}$  (thin film) no significant peaks;  $\delta_H$  (400 MHz, CDCl<sub>3</sub>) 0.55 (3H, t,  $J$  7.5 Hz, CH<sub>3</sub>), 1.62-1.75 (2H, m, CH<sub>2</sub>), 3.66, 3.70 (2H, ABq,  $J$  11.1 Hz, H-6, H-6'), 3.81 (1H, dd,  $J_{2,3}$  2.9 Hz,  $J_{3,4}$  10.1 Hz, H-3), 4.19 (1H, dd,  $J_{1,2}$  1.1 Hz, H-2), 4.51 (1H, d, H-4), 4.56 (1H, d,  $J$  11.7 Hz, CHH'), 4.68 (1H, d,  $J$  11.1 Hz, CHH'a), 4.75 (1H, d,  $J$  12.1 Hz, CHH'b), 4.78 (1H, d, CHH'b), 4.87-4.92 (4H, m, 3 x CH, H-1), 5.13 (1H, d, CHH'a), 7.23-7.65 (25H, m, 25 x Ar-H);  $\delta_C$  (100 MHz, CDCl<sub>3</sub>) 6.2 (q, CH<sub>3</sub>), 19.5 (t, CH<sub>2</sub>), 72.8 (t, C-6), 72.1, 72.8, 73.8, 75.1 (4 x t, 4 x CH<sub>2</sub>), 76.7 (d, C-4), 78.4 (d, C-2), 78.6 (d, C-3), 82.0 (s, C-5), 83.6 (d, C-1), 127.2-128.7 (d, Ar-C), 138.3, 138.5, 138.7, 138.8, 138.9 (5 x s, 5 x Ar-C);  $m/z$  (ESI<sup>+</sup>) 719

(M+MeCN+NH<sub>4</sub><sup>+</sup>, 100%); HRMS (ESI<sup>+</sup>) calcd. for C<sub>42</sub>H<sub>44</sub>O<sub>5</sub>SNa (M+Na<sup>+</sup>) 683.2802. Found 683.2807.

### Phenyl 2,3,4,6-tetra-*O*-benzyl-5-*C*-ethyl-1-thio-β-*D*-mannopyranoside **20b**

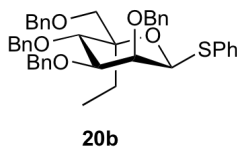

Sodium methoxide (0.5 mL of a 0.1 M solution in methanol) was added to a solution of phenyl 2,3,4,6-tetra-*O*-acetyl-5-*C*-ethyl-1-thio-β-*D*-mannopyranoside **34** (74 mg, 0.16 mmol) in methanol (2 mL). After 30 min, t.l.c (1:1, petrol:ethyl acetate) indicated formation of a product (*R<sub>f</sub>* 0) with consumption of the starting material (*R<sub>f</sub>* 0.7). The reaction mixture was neutralised with DOWEX<sup>®</sup>, filtered and concentrated *in vacuo*. The residue was suspended in anhydrous DMF (2 mL) and sodium hydride (38 mg, 0.96 mmol of 60% in mineral oil) added. Benzyl bromide (83 μL, 0.70 mmol) was added dropwise and the reaction mixture stirred under an atmosphere of argon. After 18 h, t.l.c (3:1, petrol:ethyl acetate) indicated formation of a product (*R<sub>f</sub>* 0.9) with consumption of the starting material (*R<sub>f</sub>* 0). The reaction mixture was quenched with methanol (1 mL) and concentrated *in vacuo*. The residue was resuspended in diethyl ether (20 mL) and washed with water (20 mL). The aqueous layer was re-extracted with diethyl ether (2 x 20 mL) and the combined organic layers were dried (MgSO<sub>4</sub>), filtered and concentrated *in vacuo*. The residue was purified by flash column chromatography (petrol→3:1, petrol:ethyl acetate) to afford phenyl 2,3,4,6-tetra-*O*-benzyl-5-*C*-ethyl-1-thio-β-*D*-mannopyranoside **20b** (93 mg, 88 %) as a colourless oil;  $[\alpha]_D^{22} +11.1$  (*c*, 1.0 in CHCl<sub>3</sub>);  $\nu_{\max}$  (thin film) no significant peaks;  $\delta_H$  (400 MHz, CDCl<sub>3</sub>) 0.88 (3H, t, *J* 7.5 Hz, CH<sub>3</sub>), 1.80-2.14 (2H, m, CH<sub>2</sub>), 3.71, 3.84 (2H, ABq, *J* 9.9 Hz, H-6, H-6'), 3.88 (1H, dd, *J*<sub>1,2</sub> 7.5 Hz, *J*<sub>2,3</sub> 3.0 Hz, H-2), 3.92 (1H, dd, *J*<sub>3,4</sub> 5.4 Hz, H-3), 3.95 (1H, d, H-4), 4.44-4.49 (3H, m, 3 x CHH'), 4.52 (1H, d, *J* 10.8 Hz, CHH'), 4.59 (2H, d, *J* 3.8 Hz, 2 x CHH'), 4.64 (1H, d, *J* 11.9 Hz, CHH'), 4.66 (1H, d, *J* 12.0 Hz, CHH'), 5.45 (1H, d, H-1), 7.19-7.59 (25H, m, 25 x Ar-H);  $\delta_C$  (100 MHz, CDCl<sub>3</sub>) 7.5 (q, CH<sub>3</sub>), 25.3 (t, CH<sub>2</sub>), 68.8 (t, C-6), 72.5, 73.0, 73.3, 73.8 (4 x t, 4 x CH<sub>2</sub>), 75.1, 75.4, 75.6 (3 x d, C-2, C-3, C-4), 81.7 (s, C-5), 81.9 (d, C-1), 126.9-131.4 (d, Ar-C), 135.1 (s, Ar-C-S), 138.1, 138.3, 138.4, 138.6 (4 x s, 4 x Ar-

C);  $m/z$  (ESI<sup>+</sup>) 719 (M+MeCN+NH<sub>4</sub><sup>+</sup>, 100%); HRMS (ESI<sup>+</sup>) calcd. for C<sub>42</sub>H<sub>44</sub>O<sub>5</sub>SNa (M+Na<sup>+</sup>) 683.2802. Found 683.2807.

### Phenyl 2,3,4,6-tetra-*O*-benzyl-5-*C*-methyl-1-thio- $\alpha$ -D-mannopyranoside **20a**

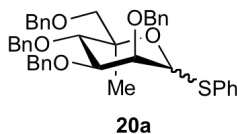

Sodium methoxide (1 mL of a 0.1 M solution in methanol) was added to a solution of phenyl 2,3,4,6-tetra-*O*-acetyl-5-*C*-methyl-1-thio- $\alpha$ -D-mannopyranoside **36** (171 mg, 0.38 mmol) in methanol (2 mL). After 30 min, t.l.c (1:1, petrol:ethyl acetate) indicated formation of a product ( $R_f$  0) with consumption of the starting material ( $R_f$  0.7). The reaction mixture was neutralised with DOWEX<sup>®</sup>, filtered and concentrated *in vacuo*. The residue was suspended in anhydrous DMF (2 mL) and sodium hydride (90 mg, 2.26 mmol of 60% in mineral oil) added. Benzyl bromide (200  $\mu$ L, 1.67 mmol) was added dropwise and the reaction mixture stirred under an atmosphere of argon. After 18 h, t.l.c (3:1, petrol:ethyl acetate) indicated formation of a product ( $R_f$  0.9) with consumption of the starting material ( $R_f$  0). The reaction mixture was quenched with methanol (1 mL) and concentrated *in vacuo*. The residue was resuspended in diethyl ether (50 mL) and washed with water (50 mL). The aqueous layer was re-extracted with diethyl ether (2 x 30 mL) and the combined organic layers dried (MgSO<sub>4</sub>), filtered and concentrated *in vacuo*. The residue was purified by flash column chromatography (petrol $\rightarrow$ 3:1, petrol:ethyl acetate) to afford phenyl 2,3,4,6-tetra-*O*-benzyl-5-*C*-methyl-1-thio- $\alpha$ -D-mannopyranoside **20a** (135 mg, 55 %) as a mixture of anomers and as a colourless oil;  $\alpha$ : $\beta$ , 2:1;  $\nu_{\max}$  (thin film) no significant peaks;  $\delta_H$  (400 MHz, CDCl<sub>3</sub>) 1.23 (3H, s, CH<sub>3</sub> $\alpha$ ), 1.45 (3H, s, CH<sub>3</sub> $\beta$ ), 3.58, 3.73 (1H, ABq,  $J$  9.8 Hz, H-6 $\beta$ , H-6' $\beta$ ), 3.62, 3.69 (2H, ABq,  $J$  11.1 Hz, H-6 $\alpha$ , H-6' $\alpha$ ), 3.81 (1H, dd,  $J_{2,3}$  2.9 Hz,  $J_{3,4}$  10.8 Hz, H-3 $\alpha$ ), 3.91 (1H, dd,  $J_{1,2}$  5.6 Hz,  $J_{2,3}$  3.1 Hz, H-2 $\beta$ ), 3.99 (1H, dd,  $J_{3,4}$  7.1 Hz, H-3 $\beta$ ), 4.06 (1H, d, H-4 $\beta$ ), 4.18 (1H, dd,  $J_{1,2}$  1.0 Hz, H-2 $\alpha$ ), 4.26 (1H, d, H-4 $\alpha$ ), 4.45-4.67 (10H, m, 10 x CH), 4.74-4.93 (5H, m, 5 x CH), 5.04 (1H, d, H-1 $\alpha$ ), 5.11 (1H, d,  $J$  11.4 Hz, CH), 5.50 (1H, d, H-1 $\beta$ ), 7.18-7.54 (50H, m, 50 x Ar-H);  $\delta_C$  (100 MHz, CDCl<sub>3</sub>) 13.8 (q, CH<sub>3</sub> $\alpha$ ), 20.5 (q, CH<sub>3</sub> $\beta$ ), 72.3, 72.7, 73.3 (3 x t, CH<sub>2</sub>), 73.6 (t, C-6 $\beta$ ), 73.7, 74.3 (2 x t, CH<sub>2</sub>), 75.1 (t, C-6 $\alpha$ ), 75.4 (t,



CH<sub>2</sub>), 75.6, 75.6, 75.9, 76.0 (4 x d, C-4 $\alpha$ , C-2 $\beta$ , C-3 $\beta$ , C-4 $\beta$ ), 78.5 (d, C-2 $\alpha$ ), 80.6, 80.9 (2 x s, C-5 $\alpha$ , C-5 $\beta$ ), 80.9 (d, C-3 $\alpha$ ), 82.8 (d, C-1 $\beta$ ), 83.0 (d, C-1 $\alpha$ ), 126.8-131.5 (d, Ar-C), 134.9-138.8 (s, Ar-C); *m/z* (ESI<sup>+</sup>) 705 (M+MeCN+NH<sub>4</sub><sup>+</sup>, 100%); HRMS (ESI<sup>+</sup>) calcd. for C<sub>41</sub>H<sub>46</sub>O<sub>5</sub>SN (M+NH<sub>4</sub><sup>+</sup>) 664.3091. Found 664.3092.

## 1.2 C-6 substituted monomer synthesis

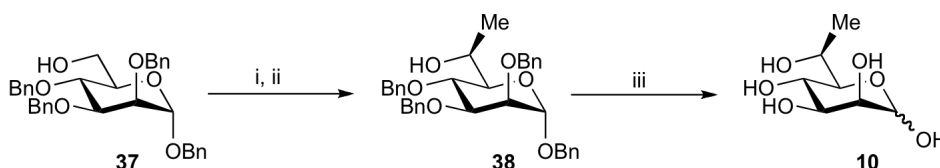

Scheme S5: i) DMSO, C<sub>2</sub>O<sub>2</sub>Cl<sub>2</sub>, DCM, -78<sup>o</sup>C→RT, ii) MeMgBr, THF, 56% over 2 steps, iii) H<sub>2</sub>, Pd/C, MeOH, 95%.

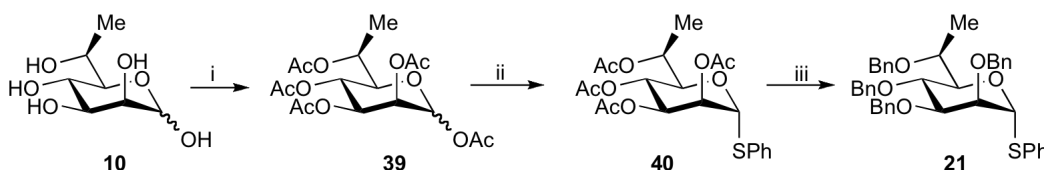

Scheme S6: i) Ac<sub>2</sub>O, Pyridine, 92%, ii) Thiophenol, BF<sub>3</sub>.OEt<sub>2</sub>, DCM, 0<sup>o</sup>C-RT, 80, iii) NaOMe, MeOH then BnBr, NaH, DMF, 74%.

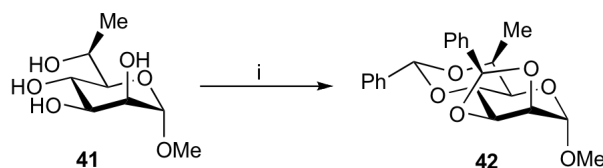

Scheme S7: i) PhCH(OMe)<sub>2</sub>, *p*TSA, DMF, 50 <sup>o</sup>C, 27%.

## Benzyl 2,3,4-tri-*O*-benzyl-6-*S*-6-*C*-methyl- $\alpha$ -D-mannopyranoside 38

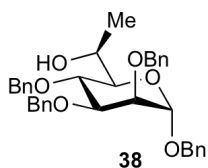

Dimethyl sulfoxide (1090  $\mu$ L, 15.4 mmol) was added dropwise to a solution of oxalyl chloride (980  $\mu$ L, 7.7 mmol) in anhydrous DCM (10 mL) at -78 <sup>o</sup>C. After 1 h, benzyl 2,3,4-tri-*O*-benzyl-6-*O*-trityl- $\alpha$ -D-mannopyranoside **37** (5)(1.04 g, 1.9 mmol) in anhydrous DCM (10 mL) was added dropwise to the reaction mixture. After a further 2 h, triethylamine (2 mL, 19.2 mmol) was added and the reaction mixture allowed to warm to

room temperature. After a further 2 h, t.l.c (2:1, petrol:ethyl acetate) indicated formation of a product ( $R_f$  0.5) with consumption of the starting material ( $R_f$  0.4). Ammonium chloride (30 mL of a saturated aqueous solution) was added and the reaction mixture was extracted with DCM (3 x 50 mL). The combined organic layers were dried ( $MgSO_4$ ), filtered and concentrated *in vacuo*. The residue was used without purification in the following step.

Methyl magnesium bromide (1.28 mL, 3.8 mmol of a 3 M solution in THF) was added to the aldehyde in anhydrous THF (10 mL). After 3 h, ammonium chloride (50 mL) was added to the reaction mixture and the product was extracted into DCM (3 x 50 mL). The combined organic layers were dried ( $MgSO_4$ ), filtered and concentrated *in vacuo*. The residue was purified by flash column chromatography (4:1, petrol:ethyl acetate  $\rightarrow$  2:1) to afford benzyl 2,3,4-tri-*O*-benzyl-6-*S*-6-*C*-methyl- $\alpha$ -D-mannopyranoside **38** (600 mg, 56% over 2 steps) as a colourless oil;  $[\alpha]_D^{25} +34.2$  ( $c$ , 1.0 in  $CHCl_3$ );  $\nu_{max}$  (thin film) 3383 (O-H, br)  $cm^{-1}$ ;  $\delta_H$  (400 MHz,  $CDCl_3$ ) 1.32 (3H, d,  $J$  6.6 Hz,  $CH_3$ ), 2.06 (1H, d,  $J$  9.6 Hz, OH), 3.51 (1H, dd,  $J_{4,5}$  9.6 Hz,  $J_{5,6}$  1.3 Hz, H-5), 3.84 (1H, dd,  $J_{1,2}$  2.0 Hz,  $J_{2,3}$  2.8 Hz, H-2), 3.98 (1H, dd,  $J_{3,4}$  9.4 Hz, H-3), 4.12-4.17 (2H, m, H-4, H-6), 4.44 (1H, d,  $J$  11.9 Hz, CH), 4.63-4.74 (5H, m, 5 x CH), 4.79 (1H, d,  $J$  12.4 Hz, CH), 4.95 (1H, d, H-1), 5.99 (1H, d,  $J$  10.6 Hz, CH), 7.26-7.38 (20H, m, 20 x Ar-H);  $\delta_C$  (100 MHz,  $CDCl_3$ ) 20.3 (q, Me), 65.6 (d, C-6), 68.1, 72.3, 72.8 (3 x t, 3 x  $CH_2$ ), 74.6 (d, C-2), 74.7 (d, C-5), 75.0 (d, -4), 80.3 (d, C-3), 97.3 (d, C-1), 127.6-128.5 (d, Ar-C), 137.0, 138.2, 138.5, 138.5 (s, Ar-C);  $m/z$  (ESI<sup>+</sup>) 572 (M+ $NH_4^+$ , 100), 1127 (2M+ $NH_4^+$ , 100%); HRMS (ESI<sup>+</sup>) calcd. for  $C_{35}H_{38}NaO_6$  (M+ $Na^+$ ) 577.2561. Found 577.2546.

### 6-*S*-6-*C*-Methyl-D-mannopyranose **10**

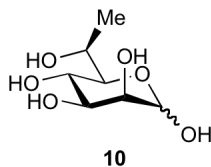

Benzyl 2,3,4-tri-*O*-benzyl-6-*S*-6-*C*-methyl- $\alpha$ -D-mannopyranoside **38** (240 mg, 0.50 mmol) was dissolved in methanol and palladium on carbon was added. Hydrogen gas was

bubbled through the solution and the the reaction mixture was left to stir under hydrogen. After 18 h, the reaction mixture was carefully filtered through celite and concentrated *in vacuo*. The residue was purified by flash column chromatography (2:2:1, ethyl acetate:isopropanol:water) to afford 6-*S*-6-*C*-methyl-*D*-mannopyranose **10** (93 mg, 95 % over 3 steps,  $\alpha$ : $\beta$ , 2:1);  $\delta_{\text{H}}$  (400 MHz,  $\text{D}_2\text{O}$ ) 1.14 (3H, d,  $J$  6.8 Hz,  $\text{CH}_3$ - $\alpha$ ), 1.17 (3H, d,  $J$  6.5 Hz,  $\text{CH}_3$ - $\beta$ ), 3.01 (1H, dd,  $J_{5,6}$  1.5 Hz,  $J_{4,5}$  9.6 Hz, H-5 $\beta$ ), 3.43 (1H, ad,  $J$  8.6 Hz, H-5 $\alpha$ ), 3.51 (1H, dd,  $J_{2,3}$  3.2 Hz,  $J_{3,4}$  9.6 Hz, H-3 $\beta$ ), 3.58-3.71 (3H, m, H-3 $\alpha$ , H-4 $\alpha$ , H-4 $\beta$ ), 3.7803.80 (2H, m, H-2 $\alpha$ , H-2 $\beta$ ), 3.99-4.08 (2H, m, H-6 $\alpha$ , H-6 $\beta$ ), 4.75 (1H, s, H-1 $\beta$ ), 5.07 (1H, s, H-1 $\alpha$ );  $\delta_{\text{C}}$  (100 MHz,  $\text{D}_2\text{O}$ ) 19.2 (q, Me- $\alpha$ , Me- $\beta$ ), 64.9 (d, C-6 $\alpha$ ), 65.0 (d, C-6 $\beta$ ), 66.9 (d, C-4 $\beta$ ), 67.2 (d, C-4 $\alpha$ ), 71.0 (d, C-3 $\alpha$ , C-2 $\alpha$ ), 71.6 (d, C-2 $\beta$ ), 73.7 (d, C-3 $\beta$ ), 74.5 (d, C-5 $\alpha$ ), 78.3 (d, C-5 $\beta$ ), 94.3 (d, C-1 $\beta$ ), 94.5 (d, C-1 $\alpha$ ).

### 1,2,3,4,6-Penta-*O*-acetyl-6-*S*-6-*C*-methyl-*D*-mannopyranose **39**

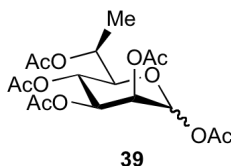

6-*S*-6-*C*-Methyl-*D*-mannopyranose **10** (209 mg, 1.1 mmol) was stirred with acetic anhydride (10 mL) and pyridine (10 mL). After 16 h, t.l.c (1:2, ethyl acetate:petrol) indicated formation of a product ( $R_f$  0.3) with consumption of the starting material ( $R_f$  0). The reaction mixture was concentrated *in vacuo* and coevaporated with toluene. The residue was purified by flash column chromatography (2:1, ethyl acetate:petrol) to afford 1,2,3,4,6-penta-*O*-acetyl-6-*S*-6-*C*-methyl-*D*-mannopyranose **39** (400 mg, 92 %) as a clear oil;  $\nu_{\text{max}}$  (thin film) 1750 (s, C=O)  $\text{cm}^{-1}$ ;  $\delta_{\text{H}}$  (400 MHz,  $\text{CDCl}_3$ ) 1.24 (3H, d,  $J$  6.6 Hz,  $\text{CH}_3$ - $\beta$ ), 1.29 (3H, d,  $J$  6.6 Hz,  $\text{CH}_3$ - $\alpha$ ), 1.96, 1.99, 2.06, 2.13, 2.16 (15H, 5 x s, 5 x OAc- $\alpha$ ), 1.96, 2.00, 2.06, 2.08, 2.20 (15H, 5 x s, 5 x OAc- $\beta$ ), 3.53 (1H, dd,  $J_{5,6}$  2.3 Hz,  $J_{4,5}$  10.1 Hz, H-5 $\beta$ ), 3.79 (1H, dd,  $J_{5,6}$  2.0 Hz,  $J_{4,5}$  9.6 Hz, H-5 $\alpha$ ), 4.99-5.05 (2H, m, H-6 $\alpha$ , H-6 $\beta$ ), 5.08 (1H, dd,  $J_{2,3}$  3.2 Hz,  $J_{3,4}$  10.1 Hz, H-3 $\beta$ ), 5.24 (1H, dd,  $J_{1,2}$  1.7 Hz,  $J_{2,3}$  3.3 Hz, H-2 $\alpha$ ), 5.26-5.36 (3H, m, H-3 $\alpha$ , H-4 $\alpha$ , H-4 $\beta$ ), 5.47 (1H, dd,  $J_{1,2}$  1.2 Hz, H-2 $\beta$ ), 5.79 (1H, d, H-1 $\beta$ ), 6.10 (1H, d, H-1 $\alpha$ );  $\delta_{\text{C}}$  (100 MHz,  $\text{CDCl}_3$ ) 14.2 (q, Me- $\beta$ ), 15.6 (q, Me- $\alpha$ ), 20.5, 20.6, 20.6, 20.8, 20.8, 20.9, 21.0 (q, 5 x OAc- $\alpha$ , 5 x OAc- $\beta$ ), 64.9 (d, C-4 $\beta$ ), 65.1 (d, C-

4 $\alpha$ ), 65.8 (d, C-5 $\beta$ ), 66.1 (d, C-5 $\alpha$ ), 68.3 (d, C-2 $\beta$ ), 68.4 (d, C-2 $\alpha$ ), 69.0 (d, C-3 $\alpha$ ), 70.9 (d, C-3 $\beta$ ), 73.4 (d, C-6 $\alpha$ ), 76.3 (d, C-6 $\beta$ ), 90.8 (d, C-1 $\alpha$ ), 90.9 (d, C-1 $\beta$ ), 167.9, 168.4, 169.4, 169.4, 169.7, 169.8, 170.0, 170.2, 170.4, 170.5 (s, C=O);  $m/z$  (ESI<sup>+</sup>) 422 (M+NH<sub>4</sub><sup>+</sup>, 100), 826 (2M+NH<sub>4</sub><sup>+</sup>, 60%); HRMS (ESI<sup>+</sup>) calcd. for C<sub>17</sub>H<sub>24</sub>NaO<sub>11</sub> (M+Na<sup>+</sup>) 427.1211. Found 427.1211.

### Phenyl 2,3,4,6-tetra-*O*-acetyl-6-*S*-6-*C*-methyl-1-thio- $\alpha$ -D-mannopyranoside **40**

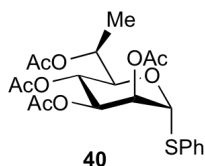

Borontrifluoroetherate (235  $\mu$ L, 1.85 mmol) was added dropwise to a solution of 1,2,3,4,6-penta-*O*-acetyl-6-*S*-6-*C*-methyl-D-mannopyranose **39** (300 mg, 0.74 mmol) and thiophenol (152  $\mu$ L, 1.48 mmol) in anhydrous DCM (5 mL) at 0 °C. After 2 h, t.l.c (2:1, petrol:ethyl acetate) indicated formation of a product ( $R_f$  0.6) with consumption of the starting material ( $R_f$  0.4). The reaction was quenched with triethylamine (1 mL), diluted with DCM (40 mL) and washed with sodium hydrogen carbonate (50 mL of a saturated aqueous solution). The aqueous phase was extracted with DCM (2 x 30 mL) and the combined organic layers were dried (MgSO<sub>4</sub>), filtered and concentrated *in vacuo*. The residue was purified by flash column chromatography (3:1, petrol:ethyl acetate) to afford phenyl 2,3,4,6-tetra-*O*-acetyl-6-*S*-6-*C*-methyl-1-thio- $\alpha$ -D-mannopyranoside **40** (268 mg, 80%) as a clear oil;  $[\alpha]_D^{25}$  +73.6 (*c*, 1.0 in CHCl<sub>3</sub>);  $\nu_{\max}$  (thin film) 1711 (s, C=O) cm<sup>-1</sup>;  $\delta_H$  (400 MHz, CDCl<sub>3</sub>) 1.12 (3H, d,  $J$  6.6 Hz, Me), 2.00, 2.04, 2.09, 2.17 (12H, 4 x s, 4 x OAc), 4.25 (1H, dd,  $J_{4,5}$  9.6 Hz,  $J_{5,6}$  1.6 Hz, H-5), 5.07 (1H, dq,  $J_d$  2.0 Hz,  $J_q$  6.6 Hz, H-6), 5.30 (1H, dd,  $J_{2,3}$  3.3 Hz,  $J_{3,4}$  10.1 Hz, H-3), 5.38 (1H, at,  $J$  9.9 Hz, H-4), 5.53 (1H, dd,  $J_{1,2}$  1.3 Hz, H-2), 5.65 (1H, d, H-1), 7.28-7.47 (5H, m, Ar-H);  $\delta_C$  (100 MHz, CDCl<sub>3</sub>) 15.8 (q, Me), 20.6, 20.9, 21.0, 21.1 (4 x q, 4 x Me), 65.7 (d, C-4), 66.3 (d, C-6), 69.6 (d, C-3), 70.9 (d, C-2), 72.5 (d, C-5), 85.8 (d, C-1), 127.9, 129.2, 131.5 (d, Ar-C), 132.4 (s, Ar-C), 169.6, 169.9, 170.0, 170.5 (4 x s C=O);  $m/z$  (ESI<sup>+</sup>) 472 (M+NH<sub>4</sub><sup>+</sup>, 100); HRMS (ESI<sup>+</sup>) calcd. for C<sub>21</sub>H<sub>26</sub>NaO<sub>9</sub>S (M+Na<sup>+</sup>) 477.1190. Found 477.1185.

**Phenyl 2,3,4,6-tetra-*O*-benzyl-6-*S*-6-*C*-methyl-1-thio- $\alpha$ -D-mannopyranoside **21****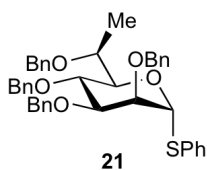

Phenyl 2,3,4,6-tetra-*O*-acetyl-6-*S*-6-*C*-methyl-1-thio- $\alpha$ -D-mannopyranoside **40** (308 mg, 0.68 mmol) was dissolved in methanol (20 mL) and sodium methoxide (20 mg, 0.37 mmol) was added. After 1 h, t.l.c (9:1, ethyl acetate:methanol) indicated formation of a product ( $R_f$  0.1) with consumption of the starting material ( $R_f$  0.9). The reaction mixture was neutralized with acidified DOWEX, filtered and concentrated *in vacuo*. The residue was dissolved in anhydrous DMF (5 mL) and sodium hydride (163 mg, 4.1 mmol of 60% dispersion in mineral oil) and benzyl bromide (300 mL, 3.0 mmol) was added. After 18 h, t.l.c (5:1, petrol:ethyl acetate) indicated formation of a product ( $R_f$  0.8) with consumption of the starting material ( $R_f$  0). The reaction mixture was quenched with methanol (10 mL) and concentrated *in vacuo*. The residue was resuspended in diethyl ether (50 mL) and washed with water (50 mL). The aqueous phase was further extracted with diethyl ether (2 x 50 mL). The combined organic layers were washed with brine (50 mL of a saturated aqueous solution), dried ( $MgSO_4$ ), filtered and concentrated *in vacuo*. The residue was purified by flash column chromatography (petrol $\rightarrow$ 3:1, petrol:ethyl acetate) to afford phenyl 2,3,4,6-tetra-*O*-benzyl-6-*S*-6-*C*-methyl-1-thio- $\alpha$ -D-mannopyranoside **21** (325 mg, 74 %) as a colourless oil;  $[\alpha]_D^{25} +75.4$  ( $c$ , 1.0 in  $CHCl_3$ );  $\nu_{max}$  (thin film) no significant peaks;  $\delta_H$  (400 MHz,  $CDCl_3$ ) 1.22 (3H, d,  $J$  6.3 Hz, Me), 3.87 (1H, dd,  $J_{2,3}$  3.0 Hz,  $J_{3,4}$  9.3 Hz, H-3), 3.92 (1H, dd,  $J_{4,5}$  9.6 Hz,  $J_{5,6}$  1.2 Hz, H-5), 4.02 (1H, d,  $J_{1,2}$  1.8 Hz, H-2), 4.08 (1H, dq,  $J_d$  1.2 Hz,  $J_q$  6.3 Hz, H-6), 4.29 (1H, at,  $J$  9.4 Hz, H-4), 4.36-4.40 (2H, m, 2 x CH), 4.59 (2H, s, 2 x CH), 4.65 (1H, d,  $J$  12.4 Hz, CH), 4.74 (1H, d,  $J$  11.9 Hz, CH), 4.81 (1H, d,  $J$  12.4 Hz, CH), 4.91 (1H, d,  $J$  10.9 Hz, CH), 5.81 (1H, d, H-1), 7.19-7.46 (25H, m, 25 x Ar-H);  $\delta_C$  (100 MHz,  $CDCl_3$ ) 15.5 (q, Me), 70.6 (t,  $CH_2$ ), 71.4 (d, C-6), 71.7, 72.0 (2 x t, 2 x  $CH_2$ ), 74.7 (d, C-4), 74.9 (t,  $CH_2$ ), 75.7 (2 x d, C-2, C-5), 80.5 (d, C-3), 85.5 (d, C-1), 127.1-130.9 (d, Ar-C), 134.5, 137.9, 138.1, 138.6, 138.6, (5 x s, 5 x Ar-C);  $m/z$  (ESI $^+$ ) 664 ( $M+NH_4^+$ , 100), 1310 ( $2M+NH_4^+$ , 100%); HRMS (ESI $^+$ ) calcd. for  $C_{41}H_{42}NaSO_5$  ( $M+Na^+$ ) 669.2645. Found 669.2634.

**Methyl 2,3:4,6-di-*O*-benzylidene-6-*S*-6-*C*-methyl- $\alpha$ -D-mannopyranoside 42**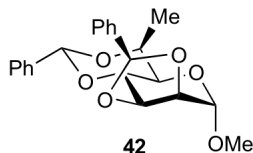

Methyl 6-*S*-6-*C*-methyl- $\alpha$ -D-mannopyranoside **41** (60 mg, 0.29 mmol), *p*TsOH (3 mg, 0.015 mmol) and dimethoxybenzaldehyde (48  $\mu$ L, 0.32 mmol) in anhydrous acetonitrile (2 mL) were heated at 50 °C under an atmosphere of argon. After 2 h, t.l.c (1:1, petrol:ethyl acetate) indicated formation of 2 products ( $R_f$  0.4, 0.9) with consumption of the starting material ( $R_f$  0). The reaction mixture was quenched with triethylamine (0.5 mL) and concentrated *in vacuo*. The residue was purified by flash column chromatography (4:1 $\rightarrow$ 1:1, petrol:ethyl acetate) to afford methyl 2,3:4,6-di-*O*-benzylidene-6-*S*-6-*C*-methyl- $\alpha$ -D-mannopyranoside **42** (23 mg, 27%) as a colourless oil;  $R_f$  0.9 (1:1, petrol:ethyl acetate);  $[\alpha]_D^{23}$  -17.1 (*c*, 0.9 in CHCl<sub>3</sub>);  $\nu_{max}$  (thin film) no significant peaks;  $\delta_H$  (500 MHz, CDCl<sub>3</sub>) 1.56 (3H, d, *J* 7.0 Hz, CH<sub>3</sub>), 3.40 (3H, s, OMe), 4.06 (1H, dd, *J*<sub>4,5</sub> 10.4 Hz, *J*<sub>5,6</sub> 6.0 Hz, H-5), 4.13 (1H, dd, *J*<sub>3,4</sub> 5.0 Hz, H-4), 4.15 (1H, d, *J*<sub>2,3</sub> 7.6 Hz, H-2), 4.55 (1H, at, *J* 6.6 Hz, H-6), 4.61 (1H, dd, H-3), 5.02 (1H, s, H-1), 5.96 (1H, s, CHPh), 6.30 (1H, s, CHPh), 7.27-7.54 (10H, m, 10 x Ar-H);  $\delta_C$  (125 MHz, CDCl<sub>3</sub>) 11.4 (q, CH<sub>3</sub>), 55.1 (q, OMe), 62.3 (d, C-5), 70.5 (d, C-6), 70.9 (d, C-4), 75.1 (d, C-2), 76.5 (d, C-3), 94.2 (d, CH), 98.7 (d, C-1), 103.0 (d, CH), 126.0, 126.4, 126.5, 128.2, 128.5, 129.0, 129.1 (d, Ar-C), 137.5, 138.7 (2 x s, Ar-C); *m/z* (ESI<sup>+</sup>) 385 (M+H<sup>+</sup>, 100%); HRMS (ESI<sup>+</sup>) calcd. for C<sub>22</sub>H<sub>24</sub>O<sub>6</sub>Na (M+ Na<sup>+</sup>) 407.1465. Found 407.1465.

**1.3 C-3 substituted monomer synthesis**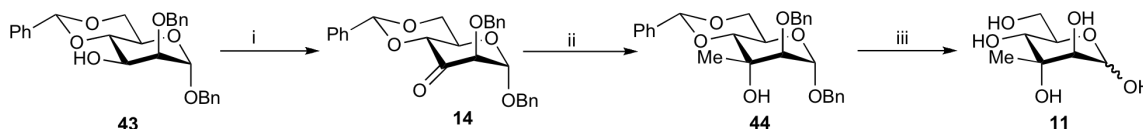

Scheme S8: i) Ac<sub>2</sub>O, DMSO, 76% ii) MeMgBr, THF, 59% iii) H<sub>2</sub>, Pd/C, MeOH, 75%.

**Benzyl 2-*O*-benzyl-4,6-*O*-benzylidene- $\alpha$ -D-mannopyranoside 43**

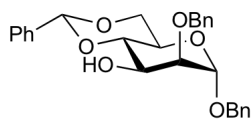

43

DIBAL-H (3.73 mL of a 1.5 M solution in toluene) was added to a solution of benzyl (S),(R)-2,3:4,6-di-*O*-benzylidene- $\alpha$ -D-mannopyranoside **43** (6)(880 mg, 2.0 mmol) in anhydrous toluene (50 mL) at  $-40\text{ }^{\circ}\text{C}$ . After 4 h, t.l.c (4:1, petrol:ethyl acetate) indicated formation of a product ( $R_f$  0.4) with consumption of the starting material ( $R_f$  0.6). The reaction mixture was allowed to warm to room temperature and quenched with ammonium chloride (20 mL of a saturated aqueous solution). Sodium potassium tartrate (40 mL of a saturated aqueous solution) was added and the mixture stirred for 20 min. The mixture was extracted with ethyl acetate (3 x 100 mL) and the combined organic layers were washed with water (100 mL) and brine (100 mL of a saturated aqueous solution), dried ( $\text{MgSO}_4$ ), filtered and concentrated *in vacuo*. The residue was purified by flash column chromatography (5:1, petrol:ethyl acetate) to afford benzyl 2-*O*-benzyl-4,6-*O*-benzylidene- $\alpha$ -D-mannopyranoside (680 mg, 76 %) as a clear oil;  $[\alpha]_{\text{D}}^{25} +34.2$  (*c*, 2.0 in  $\text{CHCl}_3$ ) [Lit.  $[\alpha]_{\text{D}}^{23} +42$  (*c*, 0.72 in  $\text{CHCl}_3$ )]; (6-8)  $\delta_{\text{H}}$  (400 MHz,  $\text{CDCl}_3$ ) 2.46 (1H, d, *J* 7.9 Hz, OH), 3.83-3.93 (3H, m, H-2, H-5, H-6) 3.97 (1H, at, *J* 9.6 Hz, H-4), 4.14-4.20 (1H, m, H-3), 4.27 (1H, dd,  $J_{5,6}$  3.3 Hz,  $J_{6,6'}$  8.6 Hz, H-6'), 4.52 (1H, d, *J* 11.9 Hz, CH), 4.68-4.76 (3H, m, 3 x CH), 4.97 (1H, d,  $J_{1,2}$  1.0 Hz, H-1), 5.60 (1H, s, CH), 7.33-7.54 (15H, m, 15 x Ar-H);  $\delta_{\text{C}}$  (100 MHz,  $\text{CDCl}_3$ ) 63.7 (d, C-5), 68.8 (d, C-3), 68.8 (t, C-6), 69.3 (t,  $\text{CH}_2$ ), 73.7 (t,  $\text{CH}_2$ ), 78.5 (d, C-2), 79.5 (d, C-4), 97.6 (d, C-1), 102.1 (d, CH), 126.3-129.1 (d, Ar-C), 136.9, 137.3, 137.6 (s, Ar-C).

#### Benzyl 2-*O*-benzyl-4,6-*O*-benzylidene-3-ulo- $\alpha$ -D-mannopyranoside **14**

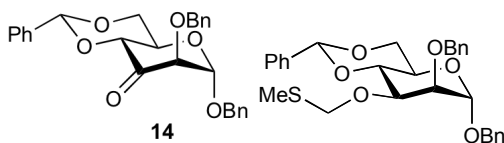

14

Benzyl 2-*O*-benzyl-4,6-*O*-benzylidene- $\alpha$ -D-mannopyranoside **43** (600 mg, 1.34 mmol) was stirred with acetic anhydride (8 mL) and DMSO (5 mL). After 24 h, t.l.c (4:1, petrol:ethyl acetate) indicated formation of 2 products ( $R_f$  0.5, 0.6) with complete

consumption of the starting material ( $R_f$  0.4). The pH was adjusted to pH 8 using sodium carbonate followed by extraction with DCM (2 x 100 mL). The combined organic phases were washed with water (2 x 30 mL), dried ( $MgSO_4$ ), filtered and concentrated in vacuo. The residue was purified by flash column chromatography (8:1, petrol:ethyl acetate) to afford sugar top (80 mg, 12%) and benzyl 2-*O*-benzyl-4,6-*O*-benzylidene-3-ulo- $\alpha$ -D-mannopyranoside **14** (350 mg, 59%) both as clear oil.

$R_f$  0.5 (4:1, petrol:ethyl acetate);  $[\alpha]_D^{23} +62.8$  ( $c$ , 1.0 in  $CHCl_3$ );  $\nu_{max}$  (thin film) 1748 ( $C=O$ , s)  $cm^{-1}$ ;  $\delta_H$  (500 MHz,  $CDCl_3$ ) 3.93 (1H, d,  $J_{1,2}$  1.3 Hz, H-2), 3.99 (1H, at,  $J$  10.1 Hz, H-6), 4.18 (1H, dat,  $J_d$  4.8 Hz,  $J_t$  10.1 Hz, H-5), 4.33 (1H, dd,  $J_{5,6'}$  4.7 Hz,  $J_{6,6'}$  10.0 Hz, H-6'), 4.50 (1H, d,  $J$  12.0 Hz,  $CHH'a$ ), 4.56 (1H, d,  $J$  12.0 Hz,  $CHH'b$ ), 4.65 (1H, d,  $CHH'a$ ), 4.73 (1H, d,  $CHH'b$ ), 4.90 (1H, d,  $J_{4,5}$  9.8 Hz, H-4), 5.17 (1H, d, H-1), 5.61 (1H, s, CH), 7.27-7.53 (15H, m, 15 x Ar-H);  $\delta_C$  (125 MHz,  $CDCl_3$ ), 64.2 (d, C-5), 66.3 (2 x t,  $CH_2$ , C-6), 70.5 (t,  $CH_2$ ), 81.1 (d, C-4), 82.7 (d, C-2), 101.3 (d, C-1), 102.2 (d, CH), 126.2-129.3 (d, Ar-C), 136.2, 136.2, 136.5 (s, Ar-C), 198.2 (s, C-3);  $m/z$  ( $ESI^+$ ) 464 ( $M+NH_4^+$ , 100%); HRMS ( $ESI^+$ ) calcd. for  $C_{28}H_{30}NaO_7$  ( $M+MeOH+Na^+$ ) 501.1884. Found 501.1884.

$R_f$  0.6 (4:1, petrol:ethyl acetate);  $[\alpha]_D^{23} +83.5$  ( $c$ , 2.0 in  $CHCl_3$ );  $\nu_{max}$  (thin film) no significant peaks;  $\delta_H$  (400 MHz,  $CDCl_3$ ) 2.14 (3H, s, Me), 3.87 (1H, dd,  $J_{1,2}$  1.3 Hz,  $J_{2,3}$  3.3 Hz, H-2), 3.90-3.96 (2H, m, H-5, H-6), 4.24 (1H, at,  $J$  10.1 Hz, H-4), 4.27 (1H, dd,  $J_{5,6'}$  2.8 Hz,  $J_{6,6'}$  8.1 Hz, H-6'), 4.35 (1H, dd,  $J_{3,4}$  10.1 Hz, H-3), 4.53 (1H, d,  $J$  11.9 Hz,  $CHH'a$ ), 4.72-4.84 (5H, m,  $CHH'a$ ,  $CH_2b$ ),  $CH_2S$ ), 4.93 (1H, d, H-1), 5.64 (1H, s, CH), 7.28-7.52 (15H, m, 15 x Ar-H);  $\delta_C$  (100 MHz,  $CDCl_3$ ) 13.8 (q, Me), 64.3 (d, C-5), 68.9 (t, C-6), 69.2 (t, C-6), 73.2 (d, C-3), 73.5 (t,  $CH_2$ ), 75.1 (t,  $CH_2S$ ), 76.4 (d, C-2), 78.7 (d, C-4), 98.3 (d, C-1), 101.6 (d, CH), 127.9-128.9 (d, Ar-C), 136.9, 137.5, 137.9 (3 x s, 3 x Ar-C);  $m/z$  ( $ESI^+$ ) 526 ( $M+NH_4^+$ , 100%); HRMS ( $ESI^+$ ) calcd. for  $C_{29}H_{32}NaSO_6$  ( $M+Na^+$ ) 531.1812. Found 531.1799.

#### **Benzyl 2-*O*-benzyl-3-*C*-methyl-4,6-*O*-benzylidene- $\alpha$ -D-altropyranoside **44****



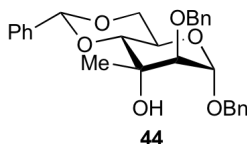

Methyl magnesium bromide (458  $\mu\text{L}$ , 1.37 mmol of a 3 M solution in THF) was added to a solution of sugar **14** (320 mg, 0.69 mmol) in anhydrous THF (10 mL) at  $-78\text{ }^{\circ}\text{C}$ . After 2 h, t.l.c (6:1, petrol:ethyl acetate) indicated formation of a product ( $R_f$  0.25) with consumption of the starting material ( $R_f$  0.3). The reaction mixture was quenched with ammonium chloride (50 mL of a saturated aqueous solution) and extracted with DCM (3 x 50 mL). The combined organic phases were washed with brine (50 mL of a saturated aqueous solution), dried ( $\text{MgSO}_4$ ), filtered and concentrated *in vacuo*. The residue was purified by flash column chromatography (6:1, petrol:ethyl acetate) to afford benzyl 2-*O*-benzyl-3-*C*-methyl-4,6-*O*-benzylidene- $\alpha$ -D-altropyranoside **44** (250 mg, 75%) as a colourless oil;  $[\alpha]_D^{23} +29.0$  ( $c$ , 1.0 in  $\text{CHCl}_3$ );  $\nu_{\text{max}}$  (thin film) 3507 (O-H, br)  $\text{cm}^{-1}$ ;  $\delta_{\text{H}}$  (400 MHz,  $\text{CDCl}_3$ ) 1.39 (3H, s, Me), 1.59 (1H, bs, OH), 3.45 (1H, s, H-2), 3.79 (1H, d,  $J_{4,5}$  9.6 Hz, H-4), 3.84 (1H, at,  $J$  10.1 Hz, H-6), 4.13 (1H, ddd,  $J_{5,6}$  5.1 Hz,  $J_{5,6}$  10.1 Hz, H-5), 4.31 (1H, dd,  $J_{6,6'}$  10.1 Hz, H-6'), 4.56 (1H, d,  $J$  11.6 Hz,  $\text{CHH}'\text{a}$ ), 4.57 (1H, d,  $J$  11.9 Hz,  $\text{CHH}'\text{b}$ ), 4.63 (1H, d,  $\text{CHH}'\text{a}$ ), 4.80 (1H, d,  $\text{CHH}'\text{b}$ ), 4.94 (1H, s, H-1), 5.61 (1H, s, CH), 7.27-7.50 (15H, m, 15 x Ar-H);  $\delta_{\text{C}}$  (125 MHz,  $\text{CDCl}_3$ ) 21.2 (q, Me), 60.1 (d, C-5), 69.0 (t, C-6), 71.3 (s, C-3), 69.8, 73.6 (2 x t, 2 x  $\text{CH}_2$ ), 79.9 (d, C-4), 80.4 (d, C-2), 97.4 (d, C-1), 102.0 (d, CH), 126.2, 128.0, 128.1, 128.6, 128.9 (d, Ar-C), 136.3, 137.1, 137.5 (s, Ar-C);  $m/z$  ( $\text{ESI}^+$ ) 480 ( $\text{M}+\text{NH}_4^+$ , 100%); HRMS ( $\text{ESI}^+$ ) calcd. for  $\text{C}_{28}\text{H}_{30}\text{NaO}_6$  ( $\text{M}+\text{Na}^+$ ) 485.1935. Found 485.1933.

### 3-*C*-Methyl-D-altropyranoside **11**

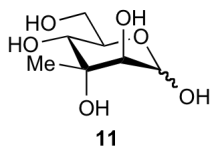

Benzyl 2-*O*-benzyl-3-*C*-methyl-4,6-*O*-benzylidene- $\alpha$ -D-altropyranoside **44** (90 mg, 0.16 mmol) was dissolved in methanol (10 mL) and palladium on carbon (10 mg, of 10% loading) was added. The reaction vessel was evacuated and refilled with hydrogen 5 times and then left to stir under an atmosphere of hydrogen. After 24 h, t.l.c (ethyl

acetate) indicated formation of a product ( $R_f$  0) with consumption of the starting material ( $R_f$  0.9). The reaction mixture was filtered through celite and concentrated *in vacuo*. The residue was purified by flash column chromatography (9:1, ethyl acetate:methanol) to afford 3-C-methyl-D-altropyranoside **11** (30 mg, 97%) as a clear oil;  $\delta_H$  (400 MHz,  $D_2O$ ) 1.19 (3H, s, Me- $\beta$ ), 1.21 (3H, s, Me- $\alpha$ ), 3.32-3.37 (2H, m, H-2 $\alpha$ , H-4 $\alpha$ ), 3.44 (1H, d,  $J_{4,5}$  10.4 Hz, H-5 $\beta$ ), 3.50 (1H, s, H-2 $\beta$ ), 3.55-3.60 (2H, m, H-6 $\alpha$ , H-5 $\alpha$ ), 3.64 (1H, dd,  $J_{5,6}$  5.8 Hz,  $J_{6,6'}$  12.1 Hz, H-6 $\beta$ ), 3.72-3.77 (2H, m, H-6' $\alpha$ , H-6' $\beta$ ), 3.83 (1H, ddd,  $J_{5,6'}$  2.0 Hz, H-5 $\beta$ ), 4.94 (1H, s, H-1 $\beta$ ), 5.05 (1H, s, H-1 $\alpha$ );  $\delta_C$  (100 MHz,  $D_2O$ ) 22.2 (q, Me- $\beta$ ), 22.3 (q, Me- $\alpha$ ), 61.8 (t, C-6 $\beta$ ), 62.0 (t, C-6 $\alpha$ ), 67.6 (d, C-2 $\beta$ ), 67.8 (d, C-2 $\alpha$ ), 69.4, 72.7 (2 x d, C-4 $\beta$ , C-5 $\beta$ ), 73.4 (s, C-3 $\beta$ ), 73.6 (s, C-3 $\alpha$ ), 74.8, 75.0 (2 x d, C-4 $\alpha$ , C-5 $\alpha$ ), 92.2 (d, C-1 $\alpha$ ), 95.2 (d, C-1 $\beta$ );  $m/z$  (ESI $^+$ ) 217 (M+Na $^+$ , 100%); HRMS (ESI $^+$ ) calcd. for  $C_7H_{14}O_6Na$  (M+Na $^+$ ) 217.0683. Found 217.0685.

#### 1.4 D-Rham monomer synthesis

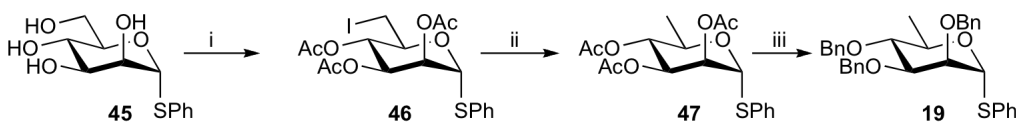

Scheme S8: I $_2$ , Imidazole, PPh $_3$ , THF, 65 $^{\circ}C$ , then Ac $_2$ O, pyridine, 58% ii) H $_2$ , Pd/C, NEt $_3$ , MeOH, 89% iii), NaOMe, MeOH then BnBr, NaH, DMF, 94%.

#### Phenyl 2,3,4-tri-O-acetyl-6-deoxy-6-iodo-thio- $\alpha$ -D-mannopyranoside **46**

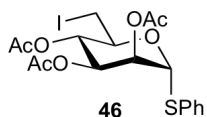

Iodine (1.08 g, 4.2 mmol) was added to a solution of phenyl-1-thio- $\alpha$ -D-mannopyranoside **45** (920 mg, 3.5 mmol), imidazole (474 mg, 7.1 mmol) and triphenylphosphine (1.1 g, 4.2 mmol) in anhydrous THF (20 mL) and the reaction mixture was heated to 70  $^{\circ}C$ . After 1 h, t.l.c (ethyl acetate) indicated formation of a product ( $R_f$  0.3) with consumption of the starting material ( $R_f$  0). The reaction mixture was concentrated *in vacuo* and the residue was resuspended in acetic anhydride (20 mL) and pyridine (20 mL). After 3 h, t.l.c (3:1, petrol:ethyl acetate) indicated formation of a product ( $R_f$  0.5) with consumption of the starting material ( $R_f$  0). The reaction mixture

was concentrated *in vacuo*, dissolved in DCM (100 mL) and washed with sodium thiosulfate (100 mL of a 10% aqueous solution) and sodium hydrogen carbonate (100 mL of a saturated aqueous solution). The organic phase was dried (MgSO<sub>4</sub>), filtered and concentrated *in vacuo*. The residue was purified by flash column chromatography (5:1, petrol:ethyl acetate) to afford phenyl 2,3,4-tri-*O*-acetyl-6-deoxy-6-iodo-thio- $\alpha$ -D-mannopyranoside **46** (1.02 g, 58% over 2 steps) as a clear oil;  $[\alpha]_{\text{D}}^{25} +79.7$  (*c*, 2.0 in CHCl<sub>3</sub>);  $\nu_{\text{max}}$  (thin film) 1750 (s, C=O) cm<sup>-1</sup>;  $\delta_{\text{H}}$  (400 MHz, CDCl<sub>3</sub>) 2.01, 2.09, 2.14 (9H, 3 x s, 3 x OAc), 3.20 (1H, dd,  $J_{5,6}$  7.6 Hz,  $J_{6,6'}$  10.9 Hz, H-6), 3.32 (1H, dd,  $J_{5,6}$  2.5 Hz, H-6'), 4.28 (1H, ddd,  $J_{4,5}$  9.8 Hz, H-5), 5.21 (1H, at,  $J$  9.8 Hz, H-4), 5.28 (1H, dd,  $J_{2,3}$  3.0 Hz,  $J_{3,4}$  9.8 Hz, H-3), 5.48 (1H, dd,  $J_{1,2}$  1.5 Hz, H-2), 5.50 (1H, d, H-1), 7.27-7.57 (5H, m, 5 x Ar-H);  $\delta_{\text{C}}$  (100 MHz, CDCl<sub>3</sub>) 3.5 (q, C-6), 20.7, 20.8, 20.9 (3 x q, 3 x OAc), 68.9 (d, C-3), 70.1 (d, C-4), 71.0 (d, C-5), 71.1 (d, C-2), 86.0 (d, C-1), 128.1, 129.2, 132.1 (d, Ar-C), 132.8 (s, Ar-C), 169.8, 169.8, 169.9 (3 x s, 3 x C=O); *m/z* (ESI<sup>+</sup>) 526 (M+NH<sub>4</sub><sup>+</sup>, 100); HRMS (ESI<sup>+</sup>) calcd. for C<sub>18</sub>H<sub>21</sub>NaO<sub>7</sub>SI (M+Na<sup>+</sup>) 530.9945 Found 530.9940.

### Phenyl 2,3,4-tri-*O*-acetyl-1-thio- $\alpha$ -D-rhamnopyranoside **47**

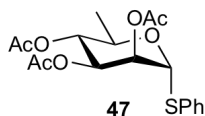

Palladium on carbon (10% loading, 50 mg) and triethylamine (1 mL) was added to phenyl 2,3,4-tri-*O*-acetyl-6-deoxy-6-iodo-1-thio- $\alpha$ -D-mannopyranoside **46** (450 mg, 0.9 mmol) in ethanol (20 mL). Hydrogen gas was bubbled through the solution to saturation. After 16 h, the reaction mixture was carefully filtered through celite and concentrated *in vacuo*. The residue was purified by flash column chromatography (3:1, petrol:ethyl acetate) to afford phenyl 2,3,4-tri-*O*-acetyl-thio- $\alpha$ -D-rhamnopyranoside **47** (300 mg, 89%) as a clear oil;  $[\alpha]_{\text{D}}^{25} +61.1$  (*c*, 2.0 in CHCl<sub>3</sub>);  $\nu_{\text{max}}$  (thin film) 1711 (s, C=O) cm<sup>-1</sup>;  $\delta_{\text{H}}$  (400 MHz, CDCl<sub>3</sub>) 1.25 (3H, d,  $J$  6.3 Hz, CH<sub>3</sub>), 2.01, 2.08, 2.14 (9H, 3 x s, 3 x OAc), 4.37 (1H, dq,  $J_{\text{d}}$  9.8 Hz,  $J_{\text{q}}$  6.3 Hz, H-5), 5.15 (1H, at,  $J$  9.8 Hz, H-4), 5.28 (1H, dd,  $J_{2,3}$  3.3 Hz,  $J_{3,4}$  10.9 Hz, H-3), 5.41 (1H, d,  $J_{1,2}$  1.5 Hz, H-1), 5.50 (1H, dd, H-2), 7.26-7.48 (5H, m, 5 x Ar-H);  $\delta_{\text{C}}$  (100 MHz, CDCl<sub>3</sub>) 17.3 (q, Me), 20.7, 20.8, 20.9 (3 x q, 3 x OAc), 67.7 (d, C-5), 69.4 (d, C-3), 71.1, 71.2 (2 x d, C-2, C-3), 85.7 (d, C-1), 127.9, 129.2,

131.8 (3 x d, Ar-C), 133.2 (s, Ar-C), 169.9, 170.0 (2 x s, 3 x C=O);  $m/z$  (ESI<sup>+</sup>) 405 (M+Na<sup>+</sup>, 100); HRMS (ESI<sup>+</sup>) calcd. for C<sub>18</sub>H<sub>22</sub>NaO<sub>7</sub>S (M+Na<sup>+</sup>) 405.0984. Found 405.0988.

### Phenyl 2,3,4-tri-*O*-benzyl-thio- $\alpha$ -D-rhamnopyranoside **19**

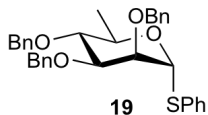

Phenyl 2,3,4-tri-*O*-acetyl-thio- $\alpha$ -D-rhamnopyranoside **47** (250 mg, 0.68 mmol) was dissolved in methanol (20 mL) and sodium methoxide (20 mg, 0.37 mmol) was added. After 1 h, t.l.c (3:1, petrol:ethyl acetate) indicated formation of a product ( $R_f$  0) with consumption of the starting material ( $R_f$  0.7). The reaction mixture was neutralized with acidified DOWEX, filtered and concentrated *in vacuo*. The residue was dissolved in anhydrous DMF (5 mL) and sodium hydride (122 mg, 3.0 mmol of 60% dispersion in mineral oil) and benzyl bromide (268  $\mu$ L, 2.2 mmol) was added. After 18 h, t.l.c (6:1, petrol:ethyl acetate) indicated formation of a product ( $R_f$  0.8) with consumption of the starting material ( $R_f$  0). The reaction mixture was quenched with methanol (10 mL) and concentrated *in vacuo*. The residue was resuspended in diethyl ether (50 mL) and washed with water (50 mL). The aqueous phase was further extracted with diethyl ether (2 x 50 mL). The combined organic layers were washed with brine (50 mL of a saturated aqueous solution), dried (MgSO<sub>4</sub>), filtered and concentrated *in vacuo*. The residue was purified by flash column chromatography (petrol $\rightarrow$ 3:1, petrol:ethyl acetate) to afford phenyl 2,3,4-tri-*O*-benzyl-thio- $\alpha$ -D-rhamnopyranoside **19** (328 mg, 94 %) as a colourless oil;  $[\alpha]_D^{25} +85.7$  ( $c$ , 2.0 in CHCl<sub>3</sub>);  $\nu_{\max}$  (thin film) no significant peaks;  $\delta_H$  (400 MHz, CDCl<sub>3</sub>) 1.41 (3H, d,  $J$  6.3 Hz, CH<sub>3</sub>), 3.74 (1H, at,  $J$  9.4 Hz, H-4), 3.89 (1H, dd,  $J_{2,3}$  3.2 Hz,  $J_{3,4}$  9.3 Hz, H-3), 4.04 (1H, dd,  $J_{1,2}$  1.8 Hz, H-2), 4.21 (1H, dq,  $J_d$  9.4 Hz,  $J_q$  6.3 Hz, H-5), 4.64-4.72 (4H, m, 4 x CH), 4.78 (1H, d,  $J$  12.4 Hz, CH), 5.02 (1H, d,  $J$  10.8 Hz, CH), 5.55 (1H, d, H-1), 7.27-7.45 (20H, m, 20 x Ar-H);  $\delta_C$  (100 MHz, CDCl<sub>3</sub>) 18.0 (q, C-6), 69.4 (d, C-5), 72.1 (t, CH<sub>2</sub>), 75.3 (t, CH<sub>2</sub>), 76.5 (d, C-2), 80.0 (d, C-3), 80.5 (d, C-4), 85.8 (d, C-1), 127.3, 127.7, 127.8, 128.1, 128.4, 129.1, 131.3 (d, Ar-C), 134.7, 137.9,

138.3, 138.5 (4 x s, 4 x Ar-C);  $m/z$  (ESI<sup>+</sup>) 544 (M+NH<sub>4</sub><sup>+</sup>, 100); HRMS (ESI<sup>+</sup>) calcd. for C<sub>33</sub>H<sub>34</sub>NaSO<sub>6</sub> (M+Na<sup>+</sup>) 549.2070. Found 540.2052.

### 1.5 Tetrasaccharide synthesis

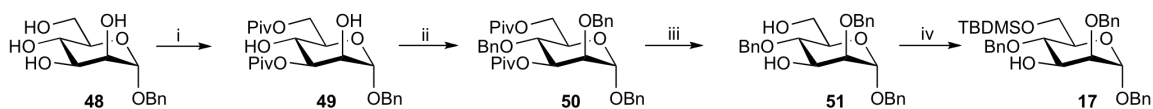

Scheme S9: i) PivCl, Pyridine, 0°C, 73%, ii) benzyl 2,2,2-trichloroacetimidate, TMSOTf, DCM, Cyclohexane, 67%, iii) NaOMe, MeOH, 70°C, 99%, iv) TBDMSCl, imidazole, DMF, 0°C, 90%.

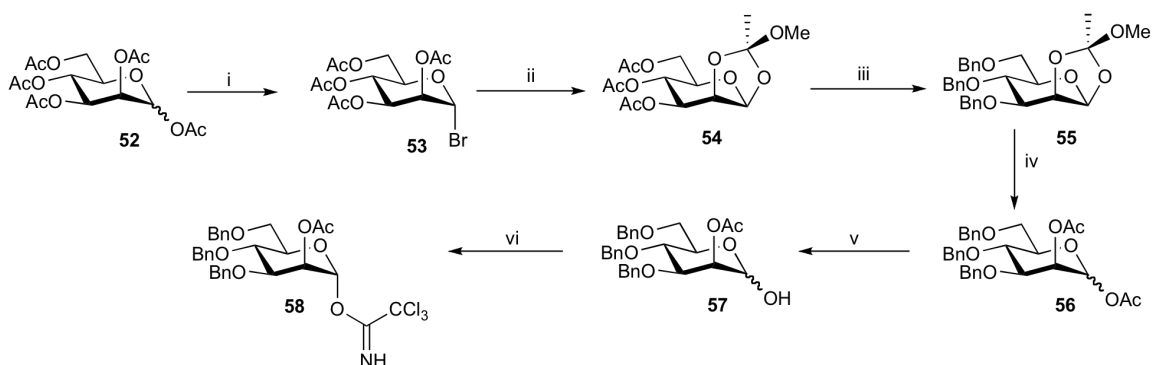

Scheme S10: i) HBr/AcOH, DCM, ii) MeOH, 2,4,6-collidine, DCM, reflux, 98%, iii) NaOMe, MeOH, then BnBr, NaH, DMF, 92% over 2 steps, iv) AcOH, H<sub>2</sub>O then Ac<sub>2</sub>O, pyridine, 99% over 2 steps, v) BnNH<sub>2</sub>, THF, 99%, vi) trichloroacetonitrile, DBU, DCM, 4Å sieves, 90%.

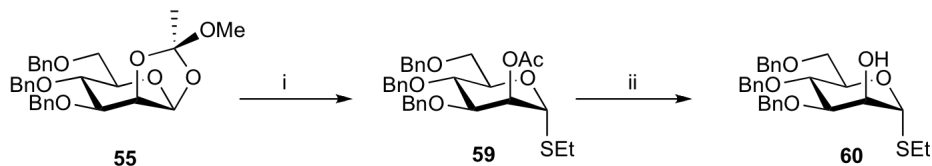

Scheme S11: EtSH, HgBr<sub>2</sub>, MeCN, 4Å sieves, 77%, ii) NaOMe, MeOH, 93%.

### Benzyl 4,6-di-O-pivaloyl- $\alpha$ -D-mannopyranoside 49

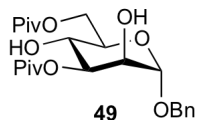

Trimethylacetyl chloride (11.8 mL, 95.6 mmol) was added dropwise to a solution of benzyl  $\alpha$ -D-mannopyranoside **48** (**9**) (10.0 g, 37.0 mmol) in anhydrous pyridine (60 mL) at 0°C. After 15 min, t.l.c. (2:1, petrol:ethyl acetate) indicated formation of a product ( $R_f$  0.4) with complete consumption of the starting material ( $R_f$  0.0). Methanol (10 mL) was added to the reaction mixture which was then concentrated *in vacuo*. The residue was

suspended in ethyl acetate (200 mL) and washed with hydrochloric acid (100 mL of a 1% aqueous solution), brine (100 mL) and sodium hydrogencarbonate (100 mL of a saturated aqueous solution). The organic layer was dried (MgSO<sub>4</sub>), filtered and concentrated *in vacuo*. Recrystallisation (ethyl acetate/petrol) afforded benzyl 4,6-di-*O*-pivaloyl- $\alpha$ -D-mannopyranoside **49** (11.8 g, 73 %) as a white crystalline solid; m.p. 133-134 °C;  $[\alpha]_D^{23} + 59.9$  (*c*, 1.0 in CHCl<sub>3</sub>);  $\nu_{\max}$  (KBr) 3483 (br, OH), 1730, 1712 (s, C=O) cm<sup>-1</sup>;  $\delta_H$  (400 MHz, CDCl<sub>3</sub>) 1.26 (18H, 1 x s, 2 x C(CH<sub>3</sub>)<sub>3</sub>), 3.85 (1H, at, *J* 9.7 Hz, H-4), 3.90-3.93 (1H, m, H-5), 4.05 (1H, at, *J* 2.1 Hz, H-2), 4.39-4.41 (2H, m, H-6, H-6'), 4.54 (1H, d, *J* 11.9 Hz, CHH'Ph), 4.76 (1H, d, *J* 11.9 Hz, CHH'Ph), 4.91 (1H, d, *J*<sub>1,2</sub> 1.4 Hz, H-1), 5.12 (1H, dd, *J*<sub>2,3</sub> 3.2 Hz, H-3), 7.28-7.33 (5H, m, 5 x Ar-H);  $\delta_C$  (100 MHz, CDCl<sub>3</sub>) 27.2 (q, 6 x CH<sub>3</sub>), 38.4 (s, 2 x C(CH<sub>3</sub>)<sub>3</sub>), 65.4 (t, CH<sub>2</sub>), 66.6 (d, C-4), 68.4 (t, C-6), 70.7 (d, C-2), 71.5 (d, C-5), 74.3 (d, C-3), 98.3 (d, C-1), 128.1, 128.3 (2 x d, 2 x Ar-C), 136.7 (s, Ar-C), 179.1 (s, C=O); *m/z* (ESI<sup>+</sup>) 497 (M+MeCN+NH<sub>4</sub><sup>+</sup>, 100 %); HRMS (ESI<sup>+</sup>) calcd. for C<sub>23</sub>H<sub>35</sub>O<sub>8</sub> (M+H<sup>+</sup>) 439.2332. Found 439.2336.

### Benzyl 2,4-di-*O*-benzyl-3,6-di-*O*-pivaloyl- $\alpha$ -D-mannopyranoside **50**

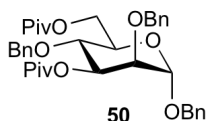

Benzyl 4,6-di-*O*-pivaloyl- $\alpha$ -D-mannopyranoside **49** (3.0 g, 6.9 mmol) and benzyl 2,2,2-trichloroacetimidate (5.1 mL, 27.4 mmol) was stirred in DCM (20 mL) and cyclohexane (20 mL) with 4 Å molecular sieves for 30 min. The reaction mixture was cooled to 0 °C and trimethylsilyltriflate (72  $\mu$ L, 0.34 mmol) was added dropwise. After 16 h, t.l.c. (7:1, petrol:ethyl acetate) indicated formation of a product (*R<sub>f</sub>* 0.6) with complete consumption of the starting material (*R<sub>f</sub>* 0.1). Triethylamine was added (2 mL) and the reaction mixture filtered through celite<sup>®</sup> and concentrated *in vacuo*. The residue was purified by flash column chromatography (7:1, petrol:ethyl acetate) to afford benzyl 2,4-di-*O*-benzyl-3,6-di-*O*-pivaloyl- $\alpha$ -D-mannopyranoside **50** (2.8 g, 67 %) as a colourless oil;  $[\alpha]_D^{23} + 51.3$  (*c*, 1.0 in CHCl<sub>3</sub>);  $\nu_{\max}$  (thin film) 1730 (s, C=O) cm<sup>-1</sup>;  $\delta_H$  (400 MHz, CDCl<sub>3</sub>) 1.28, 1.29 (18H, 2 x s, 2 x C(CH<sub>3</sub>)<sub>3</sub>), 3.95-4.04 (3H, m, H-2, H-4, H-5), 4.29 (1H, dd, *J*<sub>5,6</sub> 5.0 Hz, *J*<sub>6,6'</sub> 11.8 Hz, H-6), 4.47-4.63 (5H, m, H-6', 4 x CH), 4.78 (1H, d, *J* 11.9 Hz, CH), 4.85

(1H, d,  $J$  10.8 Hz, CH), 4.96 (1H, d,  $J_{1,2}$  1.8 Hz, H-1), 5.42 (1H, dd,  $J_{2,3}$  3.2 Hz,  $J_{3,4}$  9.1 Hz, H-3), 7.33-7.42 (15H, m, Ar-H);  $\delta_C$  (100 MHz, CDCl<sub>3</sub>) 27.3 (q, CH<sub>3</sub>), 38.6 (s, C(CH<sub>3</sub>)<sub>3</sub>), 63.1 (t, C-6), 68.9 (t, CH<sub>2</sub>), 70.4, 73.6, 74.0, 76.4 (4 x d, C-2, C-3, C-4, C-5), 73.2, 74.8 (2 x t, 2 x CH<sub>2</sub>), 96.6 (d, C-1), 127.6-128.5 (d, 15 x Ar-C), 137.0, 139.1, 140.4 (s, 3 x Ar-C), 177.9, 178.3 (2 x s, 2 x C=O);  $m/z$  (ESI<sup>+</sup>) 677 (M+NH<sub>4</sub><sup>+</sup>+MeCN, 100 %); HRMS (ESI<sup>+</sup>) calcd. for C<sub>37</sub>H<sub>50</sub>O<sub>8</sub>N (M+NH<sub>4</sub><sup>+</sup>) 636.3536. Found 636.3531.

### Benzyl 2,4-di-*O*-benzyl- $\alpha$ -D-mannopyranoside **51**

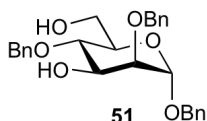

Sodium methoxide (611 mg, 11.3 mmol) was added to a solution of benzyl 2,4-di-*O*-benzyl-3,6-di-*O*-pivaloyl- $\alpha$ -D-mannopyranoside **50** (2.8 g, 4.5 mmol) in methanol (30 mL) and heated to reflux at 70 °C. After 16 h, t.l.c. (3:1, petrol:ethyl acetate) indicated formation of a product ( $R_f$  0.1) with complete consumption of the starting material ( $R_f$  0.4). The reaction mixture was stirred with acidified DOWEX until at pH 8, filtered and concentrated *in vacuo* to afford benzyl 2,4-di-*O*-benzyl- $\alpha$ -D-mannopyranoside **51** (2.0 g, 99 %) as a colourless oil;  $[\alpha]_D^{23} + 44.3$  ( $c$ , 1.0 in CHCl<sub>3</sub>);  $\nu_{\max}$  (thin film) 2923 (br, OH) cm<sup>-1</sup>;  $\delta_H$  (400 MHz, CDCl<sub>3</sub>) 3.68-3.85 (5H, m, H-2, H-4, H-5, H-6, H-6'), 4.07 (1H, dd,  $J_{2,3}$  3.8 Hz,  $J_{3,4}$  8.5 Hz, H-3), 4.47 (1H, d,  $J$  11.9 Hz, CH), 4.59 (1H, d,  $J$  11.8 Hz, CH), 4.67-4.72 (3H, m, 3 x CH), 4.92 (1H, d,  $J$  11.1 Hz, CH), 4.97 (1H, d,  $J_{1,2}$  1.8 Hz, H-1), 7.29-7.37 (15H, m, ArH);  $\delta_C$  (100 MHz, CDCl<sub>3</sub>) 62.3 (t, C-6), 69.3 (t, CH<sub>2</sub>), 71.6, 71.8, 76.5, 78.4 (4 x d, C-2, C-3, C-4, C-5), 73.2, 75.1 (2 x t, 2 x CH<sub>2</sub>), 96.4 (d, C-1), 127.9-128.7 (d, Ar-C), 137.1, 137.6, 138.3 (3 x s, 3 x Ar-C);  $m/z$  (ESI<sup>+</sup>) 509 (M+NH<sub>4</sub><sup>+</sup>+MeCN, 100 %); HRMS (ESI<sup>+</sup>) calcd. for C<sub>27</sub>H<sub>34</sub>O<sub>6</sub>N (M+NH<sub>4</sub><sup>+</sup>) 468.2386. Found 468.2394.

### Benzyl 2,4-di-*O*-benzyl-6-*O*-*tert*-butyldimethylsilyl- $\alpha$ -D-mannopyranoside **17A**

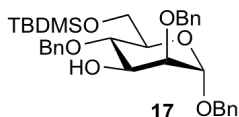

*tert*-Butyldimethylsilyl chloride (184 mg, 1.22 mmol) was added to a solution of benzyl 2,4-di-*O*-benzyl- $\alpha$ -D-mannopyranoside **51** (500 mg, 1.11 mmol) and imidazole (297 mg, 4.44 mmol) in DMF (8 mL) at 0 °C and the reaction mixture stirred under an atmosphere of argon. After 2 h, t.l.c., (3:1, petrol:ethyl acetate), indicated formation of a product ( $R_f$  0.7) with complete consumption of the starting material ( $R_f$  0.1). The reaction mixture was concentrated *in vacuo* and the residue suspended in ethyl acetate (200 mL) and washed with hydrochloric acid (100 mL of a 1 M aqueous solution). The phases were separated and the aqueous layer extracted with ethyl acetate (2 x 100 mL). The combined organic layers were washed with sodium hydrogencarbonate (200 mL of a saturated aqueous solution), dried (MgSO<sub>4</sub>), filtered and concentrated *in vacuo*. The residue was purified by flash column chromatography (4:1, petrol:ethyl acetate) to afford benzyl 2,4-di-*O*-benzyl-6-*O*-*tert*-butyldimethylsilyl- $\alpha$ -D-mannopyranoside **17** (559 mg, 90 %) as a colourless oil;  $[\alpha]_D^{22} + 24.1$  (*c*, 1.0 in CHCl<sub>3</sub>);  $\nu_{\max}$  (thin film) 3420 (br, OH) cm<sup>-1</sup>;  $\delta_H$  (400 MHz, CDCl<sub>3</sub>) 0.12, 0.13 (6H, 2 x s, 2 x CH<sub>3</sub>), 0.95 (9H, s, C(CH<sub>3</sub>)<sub>3</sub>), 3.68-3.74 (2H, m, H-4, H-5), 3.80 (1H, dd,  $J_{1,2}$  1.3 Hz,  $J_{2,3}$  3.8 Hz, H-2), 3.89 (2H, ad,  $J$  2.9 Hz, H-6, H-6'), 4.06-4.08 (1H, m, H-3), 4.49 (1H, d,  $J$  11.9 Hz, CHH'), 4.57 (1H, d,  $J$  11.7 Hz, CHH'), 4.66-4.76 (3H, m, CHH', 2 x CHH'), 4.93 (1H, d,  $J$  11.1 Hz, CHH'), 5.10 (1H, d, H-1), 7.31-7.39 (15H, m, 15 x Ar-H);  $\delta_C$  (100 MHz, CDCl<sub>3</sub>) -5.0, -5.2 (2 x q, 2 x CH<sub>3</sub>), 18.4 (s, C(CH<sub>3</sub>)<sub>3</sub>), 26.0 (q, C(CH<sub>3</sub>)<sub>3</sub>), 62.7 (t, C-6), 68.8, 72.8, 75.0 (3 x t, 3 x CH<sub>2</sub>), 71.9 (d, C-3), 72.6, 76.7 (2 x d, C-4, C-5), 78.7 (d, C-2), 95.9 (d, C-1), 127.8, 127.9, 128.1, 128.5, 128.6 (5 x d, 15 x Ar-C), 137.4, 138.7, 138.8 (3 x s, 3 x Ar-C);  $m/z$  (ESI<sup>+</sup>) 623 (M+NH<sub>4</sub><sup>+</sup>+MeCN, 100 %); HRMS (ESI<sup>+</sup>) calcd. for C<sub>33</sub>H<sub>48</sub>O<sub>6</sub>NSi (M+NH<sub>4</sub><sup>+</sup>) 582.3251. Found 582.3242.

### 1,2-Di-*O*-acetyl-3,4,6-tri-*O*-benzyl-D-mannopyranose **56**

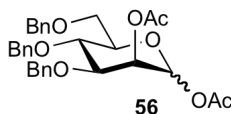

*Exo*-3,4,6-tri-*O*-benzyl-1,2-*O*-(1-methoxyethylidene)- $\beta$ -D-mannopyranoside **55** (10) (9.7 g, 19.1 mmol) was stirred in water (100 mL) and acetic acid (150 mL). After 4 h, t.l.c. (1:1, ethyl acetate:petrol) indicated formation of two products ( $R_f$  0.5, 0.6) with complete



consumption of the starting material ( $R_f$  0.8). The reaction mixture was diluted with ethyl acetate (400 mL) and the layers separated. The aqueous layer was extracted with ethyl acetate (2 x 100 mL) and the combined organic layers washed with sodium hydrogencarbonate (200 mL of a saturated aqueous solution), dried ( $MgSO_4$ ), filtered and concentrated *in vacuo*. The residue was coevaporated with toluene and dried *in vacuo*. The residue was suspended in pyridine (100 mL), cooled to 0°C and acetic anhydride (50 mL) was added dropwise. The reaction mixture was allowed to warm to room temperature. After 16 h, t.l.c. (1:1, ethyl acetate:petrol) indicated formation of a product ( $R_f$  0.8) with complete consumption of the starting materials ( $R_f$  0.5, 0.6). The reaction mixture was concentrated *in vacuo* to afford 1,2-di-*O*-acetyl-3,4,6-tri-*O*-benzyl-D-mannopyranose as a mixture of anomers **56** (10) ( $\alpha$ : $\beta$ , 1:3.5) (10.1 g, 99 %);  $\delta_H$  (400 MHz,  $CDCl_3$ ) 2.11, 2.21 (6H, 2 x s, 2 x  $CH_3$ - $\beta$ ), 2.14, 2.27 (6H, 2 x s, 2 x  $CH_3$ - $\alpha$ ), 3.62-3.66 (1H, m, H-5 $\alpha$ ), 3.74-3.97 (7H, m, H-4 $\alpha$ , H-4 $\beta$ , H-5 $\beta$ , H-6 $\alpha$ , H-6 $\beta$ , H-6' $\alpha$ , H-6' $\beta$ ), 4.04-4.06 (2H, m, H-3 $\alpha$ , H-3 $\beta$ ), 4.54-4.63 (6H, m, 3 x  $CH_2\alpha$ , 3 x  $CH_3\beta$ ), 4.70-4.81 (4H, m, 2 x  $CHH'\alpha$ , 2 x  $CHH'\beta$ ), 4.90-4.94 (2H, m,  $CHH\alpha$ ,  $CHH\beta$ ), 5.44 (1H, s, H-2 $\beta$ ), 5.68 (1H, d,  $J$  3.0 Hz, H-2 $\alpha$ ), 5.80 (1H, s, H-1 $\alpha$ ), 6.19 (1H, d,  $J_{1,2}$  1.7 Hz, H-1 $\beta$ ), 7.29-7.35 (15H, m, 15 x Ar-H).

#### ***Exo*-3,4,6-tri-*O*-acetyl-1,2-*O*-(1-methoxyethylidene)- $\beta$ -D-mannopyranoside **54****

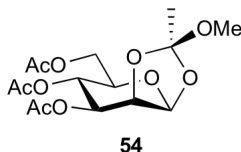

2,4,6-Collidine (20 mL, 152 mmol) and anhydrous methanol (9.1 mL, 224 mmol) were added to 2,3,4,6-tetra-*O*-acetyl- $\alpha$ -D-mannopyranosyl bromide **53**(10) (47.3g, 115 mmol) in anhydrous DCM (250 mL) and the reaction mixture was heated to reflux. After 16 h, t.l.c. (1:1, petrol:ethyl acetate) indicated formation of a product ( $R_f$  0.6) with complete consumption of the starting material ( $R_f$  0.7). Water (250 mL) was added to the reaction mixture which was then extracted with DCM (250 mL). The organic layer was washed with brine (200 mL), dried ( $MgSO_4$ ), filtered and concentrated *in vacuo*. Recrystallisation (diethyl ether) afforded *exo*-3,4,6-tri-*O*-acetyl-1,2-*O*-(1-methoxyethylidene)- $\beta$ -D-

mannopyranoside **54** (45.5 g, 98 %) as a white crystalline solid;  $[\alpha]_{\text{D}}^{22} - 26.3$  (*c*, 1.0 in  $\text{CHCl}_3$ ); [Lit.  $[\alpha]_{\text{D}}^{24} - 28.4$  (*c*, 1.5 in  $\text{CHCl}_3$ )];(11)  $\delta_{\text{H}}$  (400 MHz,  $\text{CDCl}_3$ ) 1.74 (3H, s, Me), 2.05, 2.07, 2.12 (9H, 3 x s, 3 x OAc), 3.28 (3H, s OMe), 3.68 (1H, ddd,  $J_{4,5}$  7.5 Hz,  $J_{5,6}$  2.6 Hz,  $J_{5,6'}$  4.9 Hz, H-5), 4.14 (1H, dd,  $J_{6,6'}$  12.1 Hz, H-6), 4.23 (1H, dd, H-6'), 4.61 (1H, dd,  $J_{1,2}$  2.5 Hz,  $J_{2,3}$  4.0 Hz, H-2), 5.14 (1H, dd,  $J_{3,4}$  9.9 Hz, H-3), 5.30 (1H, at,  $J$  9.7 Hz, H-4), 5.49 (1H, d, H-1).

***Exo*-3,4,6-tri-*O*-benzyl-1,2-*O*-(1-methoxyethylidene)- $\beta$ -D-mannopyranoside **55****

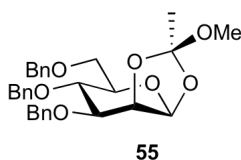

Benzyl bromide (36 mL, 304 mmol) was added dropwise to a solution of *exo*-1,2-*O*-(1-methoxyethylidene)- $\beta$ -D-mannopyranoside **54** and sodium hydride (60 % dispersion in mineral oil, 16.6 g, 415 mmol) in anhydrous DMF (500 mL) and stirred under argon. After 16h, t.l.c. (1:1, ethyl acetate:petrol) indicated formation of a product ( $R_f$  0.8) with complete consumption of the starting material ( $R_f$  0.0). Methanol (75 mL) was added to quench the reaction mixture, which was then concentrated *in vacuo*. The residue was suspended in water (500 mL) and extracted with diethyl ether (2 x 300 mL). The combined organic layers were washed with brine (200 mL), dried ( $\text{MgSO}_4$ ), filtered and concentrated *in vacuo*. The residue was purified by flash column chromatography (3:1, petrol:ethyl acetate) to afford *exo*-3,4,6-tri-*O*-benzyl-1,2-*O*-(1-methoxyethylidene)- $\beta$ -D-mannopyranoside **55** (32 g, 92% over 2 steps) as a white solid;  $[\alpha]_{\text{D}}^{22} + 25.6$  (*c*, 1.0 in  $\text{CHCl}_3$ ); [Lit.  $[\alpha]_{\text{D}}^{24} + 26$  (*c*, 1.1 in  $\text{CHCl}_3$ )];(12)  $\delta_{\text{H}}$  (400 MHz,  $\text{CDCl}_3$ ) 1.76 (3H, s, Me), 3.30 (3H, s, OMe), 3.44 (1H, ddd,  $J$  2.4 Hz,  $J$  4.3 Hz,  $J$  9.4 Hz, H-5), 3.71-3.79 (3H, m, H-3, H-6, H-6'), 3.94 (1H, at,  $J$  9.3 Hz, H-4), 4.41 (1H, dd,  $J_{1,2}$  2.5 Hz,  $J_{2,3}$  3.8 Hz, H-2), 4.55-4.64 (3H, m, 3 x CH), 4.79 (1H, d,  $J$  12.4 Hz, CH), 4.81 (1H, d,  $J$  11.3 Hz, CH), 4.94 (1H, d,  $J$  10.8 Hz, CH), 5.36 (1H, d, H-1), 7.24-7.43 (15H, m, 15 x Ar-H).

**2-*O*-Acetyl-3,4,6-tri-*O*-benzyl- $\alpha$ -D-mannopyranose **57****

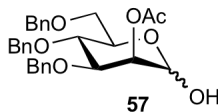

Benzylamine (3.1 mL, 28.5 mmol) was added to a solution of 1,2-di-*O*-acetyl-3,4,6-tri-*O*-benzyl- $\alpha$ -D-mannopyranose **56** (10.1 g, 19.0 mmol) in THF (100 mL). After 24 h, t.l.c. (2:1, petrol:ethyl acetate) indicated formation of a product ( $R_f$  0.3) with complete consumption of the starting material ( $R_f$  0.6). The reaction mixture was concentrated *in vacuo*, dissolved in ethyl acetate (300 mL) and washed with ice cold hydrochloric acid (100 mL of a 1 M aqueous solution) and sodium hydrogencarbonate (100 mL of a saturated aqueous solution). The organic layer was dried ( $MgSO_4$ ), filtered and concentrated *in vacuo*. The residue was purified by flash column chromatography (2:1, petrol:ethyl acetate) to afford 2-*O*-acetyl-3,4,6-tri-*O*-benzyl- $\alpha$ -D-mannopyranose **57** (9.3 g, 99 %) as a colourless oil;  $\alpha$  anomer:  $[\alpha]_D^{22} + 17.8$  ( $c$ , 1.0 in  $CHCl_3$ ); [Lit.  $[\alpha]_D^{25} + 16.7$  ( $c$ , 0.8 in  $CHCl_3$ )]; (13)  $\delta_H$  (400 MHz,  $CDCl_3$ ) 2.16 (3H, s, OAc), 3.72 (2H, m, H-6, H-6'), 3.78 (1H, at,  $J$  9.6 Hz, H-4), 4.04-4.09 (2H, m, H-3, H-5), 4.47 (1H, d,  $J$  10.8 Hz,  $\underline{CHH}$ 'a), 4.52-4.56 (2H, m, 2 x CH), 4.63 (1H, d,  $J$  12.2 Hz, CH), 4.72 (1H, d,  $J$  11.2 Hz, CH), 4.87 (1H, d,  $\underline{CHH}$ 'a), 5.25 (1H, d,  $J_{1,2}$  1.9 Hz, H-1), 5.39 (1H, dd,  $J_{2,3}$  3.2 Hz, H-2), 7.29-7.35 (15H, m, 15 x Ar-H).

### 2-*O*-Acetyl-3,4,6-tri-*O*-benzyl- $\alpha$ -D-mannopyranosyl trichloroacetimidate **58**

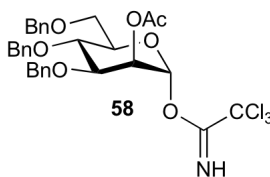

2-*O*-Acetyl-3,4,6-tri-*O*-benzyl- $\alpha$ -D-mannopyranose **57** (1.17 g, 2.38 mmol) and trichloroacetonitrile (2.4 mL, 23.8 mmol) were stirred in DCM (40 mL) with 4 Å molecular sieves for 30 min. 1,8-Diazabicyclo[5.4.0]undec-7-ene (18  $\mu$ L, 0.12 mmol) was added and the reaction mixture stirred under an atmosphere of argon. After 16 h, t.l.c. (1:1, ethyl acetate:petrol), indicated formation of a product ( $R_f$  0.7) with complete consumption of the starting material ( $R_f$  0.4). Triethylamine (1 mL) was added and the reaction mixture filtered through celite and concentrated *in vacuo*. The residue was purified by flash column chromatography (1:1, ethyl acetate:petrol) to afford 2-*O*-acetyl-

3,4,6-tri-*O*-benzyl- $\alpha$ -D-mannopyranosyl trichloroacetimidate **58** (1.36 g, 90 %) as a colourless oil;  $[\alpha]_D^{22} + 44.4$  (*c*, 1.0 in CHCl<sub>3</sub>); [Lit.  $[\alpha]_D^{20} + 45$  (*c*, 1.0 in CHCl<sub>3</sub>)]; (14)  $\delta_H$  (400 MHz, CDCl<sub>3</sub>) 2.23 (3H, s, CH<sub>3</sub>), 3.76 (1H, dd,  $J_{5,6}$  1.4 Hz,  $J_{6,6'}$  11.1 Hz, H-6), 3.89 (1H, dd,  $J_{5,6'}$  1.1 Hz, H-6'), 4.02-4.10 (3H, m, H-3, H-4, H-5), 4.56 (2H, at,  $J$  11.1 Hz, 2 x CHH'), 4.63 (1H, d,  $J$  11.2 Hz, CHH'a), 4.73 (1H, d,  $J$  12.0 Hz, CHH'), 4.78 (1H, d, CHH'a), 4.92 (1H, d,  $J$  10.6 Hz, CHH'), 5.54-5.56 (1H, m, H-2), 6.35 (1H, d,  $J_{1,2}$  1.6 Hz, H-1), 7.22-7.39 (15H, m, 15 x Ar-H), 8.73 (1H, bs, NH).

### Ethyl 2-*O*-acetyl-3,4,6-tri-*O*-benzyl-1-thio- $\alpha$ -D-mannopyranoside **59**

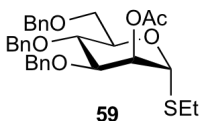

*Exo*-3,4,6-tri-*O*-benzyl-1,2-*O*-(1-methoxyethylidene)- $\beta$ -D-mannopyranoside **55** (5.0 g, 9.88 mmol) was stirred in anhydrous acetonitrile (50 mL) and 4Å molecular sieves for 1 h under an atmosphere of Argon. Ethanethiol (2.5 mL, 32.6 mmol) and mercury bromide (356 mg, 0.99 mmol) were added and the reaction mixture heated at 60 °C. After 18 h, t.l.c. (3:1, petrol:ethyl acetate) indicated formation of a product ( $R_f$  0.6) with consumption of the starting material ( $R_f$  0.4). The reaction mixture was cooled to room temperature and filtered through celite<sup>®</sup>. The filtrate was diluted with DCM (200 mL) and washed with sodium hydroxide (100 mL of a 1 M aqueous solution). The aqueous phase was extracted with DCM (2 x 100 mL) and the combined organic layers dried (MgSO<sub>4</sub>), filtered and concentrated *in vacuo*. The residue was purified by flash column chromatography (3:1, petrol:diethyl ether) to afford ethyl 2-*O*-acetyl-3,4,6-tri-*O*-benzyl-1-thio- $\alpha$ -D-mannopyranoside **59** (4.1 g, 77%) as a colourless oil;  $[\alpha]_D^{21} + 78.3$  (*c*, 1.0 in CHCl<sub>3</sub>) [Lit.  $[\alpha]_D^{22} + 76$  (*c*, 0.7 in CHCl<sub>3</sub>)]; (15)  $\delta_H$  (400 MHz, CDCl<sub>3</sub>) 1.31 (3H, t,  $J$  7.4 Hz, CH<sub>3</sub>), 2.19 (3H, s, Ac), 2.57-2.73 (2H, m, CH<sub>2</sub>), 3.71 (1H, dd,  $J_{5,6}$  1.9 Hz,  $J_{6,6'}$  10.8 Hz, H-6), 3.87 (1H, dd,  $J_{5,6'}$  4.2 Hz, H-6'), 3.92-4.00 (2H, m, H-3, H-4), 4.18-4.21 (1H, m, H-5), 4.49-4.57 (3H, m, 3 x CH), 4.70-4.73 (2H, m, 2 x CH), 4.89 (1H, d,  $J$  10.8 Hz, CH), 5.36 (1H, d,  $J_{1,2}$  1.7 Hz, H-1), 5.47 (1H, dd,  $J_{2,3}$  2.7 Hz, H-2), 7.18-7.39 (15H, m, 15 x Ar-H).



Scheme S12: i) TMSOTf, DCM, 78%, ii) Tf<sub>2</sub>O, Me<sub>2</sub>S<sub>2</sub>, TTBP, DCM, 4Å sieves, -78°C→RT, 68%, iii) NaOMe, MeOH, 95%, iv) DMTST, TTBP, DCM, 4Å sieves, -78°C→RT, v) AcOH, H<sub>2</sub>O, 50 °C, vi) H<sub>2</sub>, Pd/C, MeOH.

**Benzyl (2-*O*-acetyl-3,4,6-tri-*O*-benzyl- $\alpha$ -D-mannopyranosyl)-(1→2)-(3,4,6-tri-*O*-benzyl- $\alpha$ -D-mannopyranosyl)-(1→3)-2,4-di-*O*-benzyl-6-*O*-*tert*-butyldimethylsilyl- $\alpha$ -D-mannopyranoside **61****

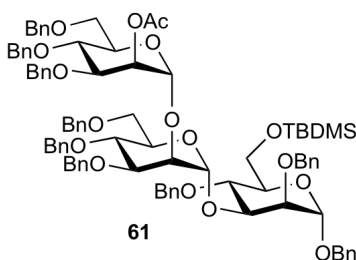

Benzyl 2,4-di-*O*-benzyl-6-*O*-*tert*-butyldimethylsilyl- $\alpha$ -D-mannopyranoside (77 mg, 0.14 mmol), ethyl 2-*O*-acetyl-3,4,6-*O*-benzyl- $\alpha$ -D-mannopyranosyl-(1→2)-3,4,6-tri-*O*-benzyl-thio- $\alpha$ -D-mannopyranoside **16** (160 mg, 0.16 mmol) and 2,6-di-*tert*-butyl-4-methylpyridine **17** (235 mg, 0.95 mmol) were dried in a dessicator overnight. The reagents were dissolved in DCM (2 mL) and transferred using a cannula to a flame dried flask containing 4Å molecular sieves. The mixture was stirred for 1 h and cooled to -78 °C. DCM (2 mL) was added to a flame dried flask containing 4Å molecular sieves and stirred for 1 h then cooled to 0 °C. To this flask was added dimethyldisulfide (73  $\mu$ L, 0.816 mmol) and trifluoromethylsulfonic anhydride (137  $\mu$ L, 0.816 mmol). After 2 min, the solution was transferred to the flask containing the flask containing the sugar reagents at -78 °C. The mixture was stirred at -78 °C under an atmosphere of argon. After 1 h, t.l.c (5:1, petrol:ethyl acetate) indicated formation of a product ( $R_f$  0.5) with complete consumption of the starting materials ( $R_f$  0.6, 0.3). The reaction mixture was quenched with triethylamine (0.5 mL) and filtered through celite. The filtrate was concentrated *in vacuo* and the residue purified by flash column chromatography (petrol→6:1, petrol:ethyl acetate) to afford benzyl 2-*O*-acetyl-3,4,6-tri-*O*-benzyl- $\alpha$ -D-mannopyranosyl-(1→2)-(3,4,6-tri-*O*-benzyl- $\alpha$ -D-mannopyranosyl)-(1→3)-2,4,di-*O*-benzyl-6-*O*-*tert*-butyldimethylsilyl- $\alpha$ -D-mannopyranoside **61** (136 mg, 68%) as a colourless oil.

$[\alpha]_D^{21} +15.3$  ( $c$ , 1.0 in CHCl<sub>3</sub>);  $\nu_{\max}$  (thin film) 1758 (br, C=O) cm<sup>-1</sup>;  $\delta_H$  (500 MHz, CDCl<sub>3</sub>) 0.06, 0.07 (6H, 2 x s, 2 x CH<sub>3</sub>), 0.91 (9H, s, C(CH<sub>3</sub>)<sub>3</sub>), 2.13 (3H, s, Ac), 3.46 (1H, d,  $J$

10.5 Hz, H-6a), 3.68-4.00 (14H, m, H-2a, H-3b/c, H-4a/b/c, H-5a/b/c, H-6b/c, H-6'a/b/c), 4.03 (1H, m, H-2b), 4.15 (1H, dd,  $J_{2,3}$  3.1 Hz,  $J_{3,4}$  9.5 Hz, H-3a), 4.31 (1H, d,  $J$  12.2 Hz, CH), 4.40 (1H, d,  $J$  10.9 Hz, CH), 4.42-4.46 (2H, m, 2 x CH), 4.51 (1H, d,  $J$  12.1 Hz, CH), 4.53-4.68 (10H, m, 10 x CH), 4.76 (1H, d,  $J$  11.7 Hz, CH), 4.82 (1 H, d,  $J$  10.9 Hz, CH), 4.88 (1H, d,  $J$  11.2 Hz, CH), 4.90 (1H, d,  $J_{1,2}$  1.4 Hz, H-1a), 5.06 (1H, d,  $J_{1,2}$  1.5 Hz, H-1c), 5.2 (1H, d,  $J_{1,2}$  1.3 Hz, H-1b), 5.54 (1H, at,  $J$  2.2 H, H-2c), 7.14-7.36 (45H, m, 45 x Ar-H);  $\delta_c$  (125 MHz, CDCl<sub>3</sub>) -5.3, -5.1, (q, 2 x CH<sub>3</sub>), 18.4 (s, C(CH<sub>3</sub>)<sub>3</sub>), 26.0 (q, C(CH<sub>3</sub>)<sub>3</sub>), 62.6 (t, C-6b), 68.4 (t, C-6a), 68.7 (t, CH<sub>2</sub>), 68.8 (d, C-2c), 69.5 (C-6c), 71.9, 72.1, 73.2, 73.4, 74.8, 74.9, 75.0 (t, 8 x CH<sub>2</sub>), 72.6, 73.4, 74.2, 74.8, 75.1, 77.2, 78.1 (d, C-2a/b, C-3b/c, C-4a/b/c, C-5a/b/c), 78.1 (d, C-3a), 96.1 (d, C-1a), 99.3 (d, C-1c), 100.9 (d, C-1b), 127.3-128.5 (d, 45 x Ar-C), 137.5-138.7 (s, 9 x Ar-C), 170.1 (s, C=O);  $m/z$  (ESI<sup>+</sup>) 1493 (M+Na<sup>+</sup>, 100 %); (M+Na<sup>+</sup>) peaks observed: 1451.7 (100%), 1452.7 (98%), 1453.7 (47%), 1454.7 (15%), 1555.7 (5%), peaks calculated: 1451.7 (99%), 1452.7 (100%), 1453.7 (56%), 1454.7 (22%), 1555.7 (7%).

**Benzyl (3,4,6-tri-*O*-benzyl- $\alpha$ -D-mannopyranosyl)-(1 $\rightarrow$ 2)-(3,4,6-tri-*O*-benzyl- $\alpha$ -D-mannopyranosyl)-(1 $\rightarrow$ 3)-2,4,di-*O*-benzyl-6-*O*-*tert*-butyldimethylsilyl- $\alpha$ -D-mannopyranoside 18A**

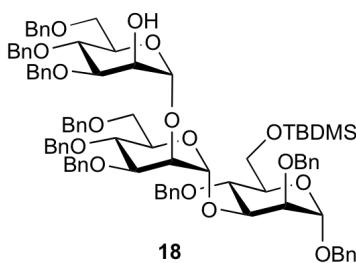

Benzyl (2-*O*-acetyl-3,4,6-tri-*O*-benzyl- $\alpha$ -D-mannopyranosyl)-(1 $\rightarrow$ 2)-(3,4,6-tri-*O*-benzyl- $\alpha$ -D-mannopyranosyl)-(1 $\rightarrow$ 3)-2,4,di-*O*-benzyl-6-*O*-*tert*-butyldimethylsilyl- $\alpha$ -D-mannopyranoside **61** (40 mg, 0.026 mmol) was dissolved in methanol (2 mL) and sodium methoxide (0.2 mL of a 0.1 M solution in methanol) was added. After 24 h, t.l.c. (3:1, petrol:ethyl acetate) showed formation of a product ( $R_f$  0.3) and complete consumption of the starting material ( $R_f$  0.6). Ammonium chloride (a drop of a saturated aqueous solution) was added followed by sodium hydrogen carbonate (10 mL of a saturated aqueous solution). The mixture was extracted with DCM (3 x 25 mL) and the combined

organic layers dried (MgSO<sub>4</sub>), filtered and concentrated *in vacuo* to afford benzyl (3,4,6-tri-*O*-benzyl- $\alpha$ -D-mannopyranosyl)-(1 $\rightarrow$ 2)-(3,4,6-tri-*O*-benzyl- $\alpha$ -D-mannopyranosyl)-(1 $\rightarrow$ 3)-2,4-di-*O*-benzyl-6-*O*-*tert*-butyldimethylsilyl- $\alpha$ -D-mannopyranoside **18A** (35 mg, 95 %) as a colourless oil;  $[\alpha]_D^{21} +23.9$  (*c*, 1.0 in CHCl<sub>3</sub>);  $\nu_{\max}$  (thin film) 3420 (br, OH) cm<sup>-1</sup>;  $\delta_H$  (500 MHz, CDCl<sub>3</sub>) 0.10, 0.11 (6H, 2 x s, 2 x CH<sub>3</sub>), 0.95 (9H, s, C(CH<sub>3</sub>)<sub>3</sub>), 3.53 (1H, d, *J* 10.6 Hz, H-6c), 3.66-3.73 (4H, m, H-5a), H-6b, H-6'b, H-6'c), 3.77-3.81 (2H, m, H-6a, H-6'a), 3.82-3.96 (5H, bm, H-3c, H-4a, H-4b, H-4c, H-5c), 3.99 (1H, at, *J* 2.6 Hz, H-2a), 4.02-4.05 (2H, m, H-3b, H-5b), 4.0 (1H, m, H-2b), 4.16 (1H, m, H-2c), 4.20 (1H, dd, *J*<sub>2,3</sub> 3.1 Hz, *J*<sub>3,4</sub> 9.1 Hz, H-3a), 4.37 (1H, d, *J* 12.4 Hz, CH), 4.47 (1H, d, *J* 12.0 Hz, CH), 4.51 (1H, d, *J* 10.9 Hz, CH), 4.55 (1H, d, *J* 11.8 Hz, CH), 4.58-4.63 (9H, m, 9 x CH), 4.66 (1H, d, *J* 8.7 Hz, CH), 4.71 (1H, d, *J* 11.7 Hz, CH), 4.80 (1H, d, *J* 11.8 Hz, CH), 4.83 (1H, d, *J* 10.9 Hz, CH), 4.90 (1H, d, *J* 11.1 Hz, CH), 4.94 (1H, d, *J*<sub>1,2</sub> 0.9 Hz, H-1a), 5.17 (1H, d, *J*<sub>1,2</sub> 1.1 Hz, H-1c), 5.30 (1H, s, H-1b), 7.20-7.35 (45H, m, 45 x Ar-H);  $\delta_C$  (125 MHz, CDCl<sub>3</sub>) -5.3 (q, 2 x CH<sub>3</sub>), 18.4 (s, C(CH<sub>3</sub>)<sub>3</sub>), 25.9 (q, C(CH<sub>3</sub>)<sub>3</sub>), 62.6 (t, C-6a), 68.5 (t, C-6c), 68.6 (d, C-2c), 68.7 (t, CH<sub>2</sub>), 69.5 (t, C-6b), 71.6 (d, C-5c), 71.9, 72.1, 72.2 (3 x t, 3 x CH<sub>2</sub>), 72.6 (d, C-5b), 73.2 (t, CH<sub>2</sub>), 73.3 (d, C-5a), 73.3 (t, CH<sub>2</sub>), 74.2, 74.9, 75.2 (d, C-2b, C-4a, C-4b, C-4c), 74.7, 74.9 (2 x t, 2 x CH<sub>2</sub>), 75.2 (d, C-2a), 78.0 (d, C-3b), 79.9 (d, C-3a, C-3c), 96.0 (d, C-1a), 101.0 (d, C-1b, C-1c), 126.0-129.0 (d, Ar-C), 137.4-138.7 (s, Ar-C); *m/z* (ESI<sup>+</sup>) 1487 (M+Na<sup>+</sup>, 100%), (M+Na<sup>+</sup>) peaks measured: 1452.7 (100%), 1451.7 (95%), 1453.7 (53%), 1454.7 (13%), 1455.7 (2%), peaks calculated: 1452.7 (100%), 1451.7 (99%), 1453.7 (51%), 1454.7 (17%), 1455.7 (6%).

**Benzyl 2-*O*-acetyl-3,4,6-tri-*O*-benzyl- $\alpha$ -D-mannopyranosyl-(1 $\rightarrow$ 2)- 3,4,6-tri-*O*-benzyl- $\alpha$ -D-mannopyranosyl-(1 $\rightarrow$ 2)-3,4,6-tri-*O*-benzyl- $\alpha$ -D-mannopyranosyl-(1 $\rightarrow$ 3)-2,4-di-*O*-benzyl-6-*O*-*tert*-butyldimethylsilyl- $\alpha$ -D-mannopyranoside 25A**



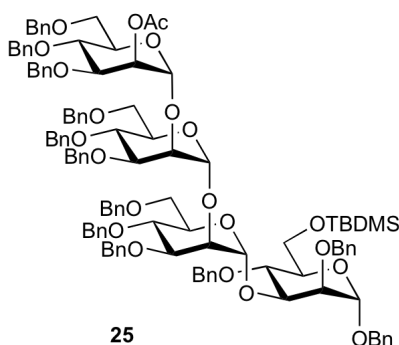

Benzyl 2,4-di-*O*-benzyl-6-*O*-*tert*-butyldimethylsilyl- $\alpha$ -D-mannopyranoside **5.3.13** (29 mg, 0.051 mmol), ethyl 2-*O*-acetyl-3,4,6-tri-*O*-benzyl- $\alpha$ -D-mannopyranosyl-(1 $\rightarrow$ 2)-3,4,6-tri-*O*-benzyl- $\alpha$ -D-mannopyranosyl-(1 $\rightarrow$ 2)-3,4,6-tri-*O*-benzyl-thio- $\alpha$ -D-mannopyranoside **5.3.106** (60 mg, 0.043 mmol) and 2,6-di-*tert*-butyl-4-methylpyridine (76 mg, 0.30 mmol) were dried in a dessicator overnight. The reagents were dissolved in DCM (1 mL) and transferred using a cannula to a flame dried flask containing 4Å molecular sieves. The mixture was stirred for 1 h and cooled to -78 °C. DCM (1 mL) was added to a flame dried flask containing 4Å molecular sieves and stirred for 1 h then cooled to 0 °C. To this flask was added dimethyldisulfide (23  $\mu$ L, 0.26 mmol) and trifluoromethylsulfonic anhydride (44  $\mu$ L, 0.26 mmol). After 2 min, the solution was transferred to the flask containing the sugar reagents at -78 °C. The mixture was stirred at -78 °C under an atmosphere of argon. After 1 h, t.l.c (5:1, petrol:ethyl acetate) indicated formation of a product ( $R_f$  0.4) with complete consumption of the starting materials ( $R_f$  0.1, 0.3). The reaction mixture was quenched with triethylamine (0.5 mL) and filtered through celite<sup>®</sup>. The filtrate was concentrated *in vacuo* and the residue purified by flash column chromatography (petrol $\rightarrow$ 6:1, petrol:ethyl acetate) to afford benzyl 2-*O*-acetyl-3,4,6-tri-*O*-benzyl- $\alpha$ -D-mannopyranosyl-(1 $\rightarrow$ 2)-3,4,6-tri-*O*-benzyl- $\alpha$ -D-mannopyranosyl-(1 $\rightarrow$ 2)-3,4,6-tri-*O*-benzyl- $\alpha$ -D-mannopyranosyl-(1 $\rightarrow$ 3)-2,4-di-*O*-benzyl-6-*O*-*tert*-butyldimethylsilyl- $\alpha$ -D-mannopyranoside **25A** (24 mg, 29%) as a colourless oil;  $[\alpha]_D^{22} +30.5$  ( $c$ , 1.0 in  $\text{CHCl}_3$ );  $\nu_{\text{max}}$  (thin film) 1744 (s, C=O)  $\text{cm}^{-1}$ ;  $\delta_{\text{H}}$  (500 MHz,  $\text{CDCl}_3$ ) 0.10, 0.10 (6H, 2 x s, 2 x Me), 0.95 (9H, s,  $\text{C}(\text{CH}_3)_3$ ), 2.19 (3H, s, OAc), 3.47 (1H, dd,  $J_{5,6}$  1.1 Hz,  $J_{6,6'}$  10.5 Hz, H-6d), 3.53 (1H, dd,  $J_{5,6}$  1.0 Hz,  $J_{6,6'}$  10.8 Hz, H-6c), 3.65-3.72 (5H, m, H-5a, H-6b, H-6'b, H-6'c, H-6'd), 3.77-3.78 (2H, m, H-6a, H-6'a), 3.83 (1H, at,  $J$  9.6 Hz, H-4b), 3.88-3.94 (3H, m, H-4a, H-5c, H-5d), 3.94-4.04

(6H, m, H-2a, H-3b, H-5b, H-3c, H-4c, H-4d), 4.07 (1H, dd,  $J_{2,3}$  3.3 Hz,  $J_{3,4}$  9.4 Hz, H-3d), 4.10 (1H, at,  $J$  2.2 Hz, H-2c), 4.18 (1H, at,  $J$  2.2 Hz, H-2b), 4.21 (1H, dd,  $J_{2,3}$  3.1 Hz,  $J_{3,4}$  9.4 Hz, H-3a), 4.26-4.91 (24H, m, 12 x CH<sub>2</sub>), 4.94 (1H,  $J_{1,2}$  1.5 Hz, H-1a), 5.16 (1H, d,  $J_{1,2}$  1.5 Hz, H-1d), 5.24 (1H, d,  $J_{1,2}$  1.6 Hz, H-1c), 5.31 (1H, d,  $J_{1,2}$  1.3 Hz, H-1b), 5.63 (1H, dd, H-2d), 7.14-7.43 (60H, m, 60 x Ar-H);  $\delta_C$  (125 MHz, CDCl<sub>3</sub>, assigned using HSQC) -5.0 (q, 2 x CH<sub>3</sub>), 21.2 (q, OAc), 26.1 (q, C(CH<sub>3</sub>)<sub>3</sub>), 62.4 (t, C-6a), 68.3 (t, C-6d), 68.6 (t, C-6c), 69.5 (t, C-6b), 68.6, 71.9, 72.0, 73.0, 73.3, 74.7, 75.2 (t, 12 x CH<sub>2</sub>), 71.8 (d, C-5c), 72.3 (d, C-5d), 72.5 (d, C-5b), 73.2 (d, C-5a), 74.0 (d, C-4c), 74.5 (d, C-4d), 74.6 (d, C-2b), 74.7 (d, C-4a), 74.8 (d, C-4b), 75.1 (d, C-2c), 77.9 (d, C-2a), 78.2 (d, C-3d), 79.4 (2 x d, C-3b, C-3c), 80.0 (d, C-3a), 95.9 (d, C-1a), 99.3 (d, C-1d), 100.4 (d, C-1c), 101.0 (d, C-1b), 128.0 (d, Ar-C);  $m/z$  (ESI<sup>+</sup>) 1927 (M+Na<sup>+</sup>, 100%), (M+Na<sup>+</sup>) peaks measured: 1925.9 (69%), 1926.9 (100%), 1927.9 (63%), 1928.9 (24%), 1929.9 (8%), 1930.9 (2%), calculated peaks: 1925.9 (75%), 1926.9 (100%), 1927.9 (72%), 1928.9 (36%), 1929.9 (15%), 1930.9 (5%).

**Benzyl (2,3,4,6-tetra-*O*-benzyl-5-*C*-ethyl- $\alpha$ -D-mannopyranosyl)-(1 $\rightarrow$ 2)-3,4,6-tri-*O*-benzyl- $\alpha$ -D-mannopyranosyl-(1 $\rightarrow$ 2)-3,4,6-tri-*O*-benzyl- $\alpha$ -D-mannopyranosyl-(1 $\rightarrow$ 3)-2,4-di-*O*-benzyl-6-*O*-tert-butyldimethylsilyl- $\alpha$ -D-mannopyranoside **23b****

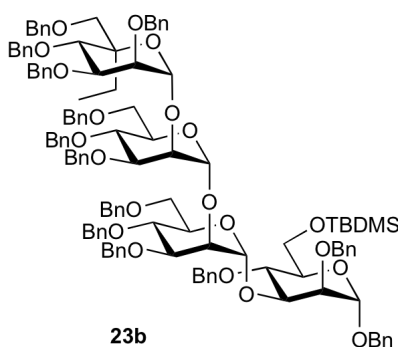

Benzyl (3,4,6-tri-*O*-benzyl- $\alpha$ -D-mannopyranosyl)-(1 $\rightarrow$ 2)-(3,4,6-tri-*O*-benzyl- $\alpha$ -D-mannopyranosyl)-(1 $\rightarrow$ 3)-2,4-di-*O*-benzyl-6-*O*-tert-butyldimethylsilyl- $\alpha$ -D-mannopyranoside **18** (59 mg, 0.041 mmol), phenyl 2,3,4,6-tetra-*O*-benzyl-5-*C*-ethyl-1-thio- $\beta$ -D-mannopyranoside **20b** (31 mg, 0.050 mmol) and 2,4,6-tri-*t*-butylpyrimidine (85 mg, 0.328 mmol) were dried in a dessicator overnight. The reagents were dissolved in DCM (1 mL) and transferred using a cannula to a flame dried flask containing 4Å

molecular sieves. The mixture was stirred for 1 h and cooled to  $-78\text{ }^{\circ}\text{C}$ . DCM (1 mL) was added to a flame dried flask containing  $4\text{ \AA}$  molecular sieves and stirred for 1 h then cooled to  $0\text{ }^{\circ}\text{C}$ . To this flask was added dimethyldisulfide (28  $\mu\text{L}$ , 0.31 mmol) and trifluoromethylsulfonic anhydride (54  $\mu\text{L}$ , 0.31 mmol). After 2 min, the solution was transferred to the flask containing the sugar reagents at  $-78\text{ }^{\circ}\text{C}$ . The mixture was stirred at  $-78\text{ }^{\circ}\text{C}$  under an atmosphere of argon. After 1 h, t.l.c (5:1, petrol:ethyl acetate) indicated formation of a product ( $R_f$  0.5) with complete consumption of the starting materials ( $R_f$  0.1, 0.7). The reaction mixture was quenched with triethylamine (0.5 mL) and filtered through celite<sup>®</sup>. The filtrate was concentrated *in vacuo* and the residue purified by flash column chromatography (petrol $\rightarrow$ 6:1, petrol:ethyl acetate) to afford benzyl (2,3,4,6-tetra-*O*-benzyl-5-*C*-ethyl- $\alpha$ -D-mannopyranosyl)-(1 $\rightarrow$ 2)-3,4,6-tri-*O*-benzyl- $\alpha$ -D-mannopyranosyl-(1 $\rightarrow$ 2)-3,4,6-tri-*O*-benzyl- $\alpha$ -D-mannopyranosyl-(1 $\rightarrow$ 3)-2,4-di-*O*-benzyl-6-*O*-tert-butyltrimethylsilyl- $\alpha$ -D-mannopyranoside **23b** (16 mg, 20%) as a colourless oil;  $[\alpha]_D^{17} +12.3$  (*c*, 1.0 in  $\text{CHCl}_3$ );  $\nu_{\text{max}}$  (thin film) no significant peaks;  $\delta_{\text{H}}$  (500 MHz  $\text{CDCl}_3$ ) 0.88, 0.93 (6H, 2 x s, 2 x Me), 0.82 (3H, t,  $J$  7.3 Hz,  $\text{CH}_2\text{CH}_3$ ), 0.94 (9H, s,  $\text{C}(\text{CH}_3)_3$ ), 1.73-2.00 (2H, m,  $\text{CH}_2\text{CH}_3$ ), 3.49-3.54 (2H, m, H-6c, H-6d), 3.62-3.67 (2H, m, H-5a, H-6'c), 3.69-3.78 (5H, m, H-6a, H-6'a, H-6b, H-6'b, H-6'd), 3.82-3.94 (6H, m, H-4a, H-3b, H-4b, H-4c, H-5c, H-2d), 3.99 (1H, dd,  $J_{1,2}$  1.9 Hz,  $J_{2,3}$  2.9 Hz, H-2a), 4.04-4.06 (2H, m, H-3c, H-5b), 4.07-4.10 (2H, m, H-2c, H-3d), 4.18 (1H, dd,  $J_{3,4}$  10.2 Hz, H-3a), 4.28 (1H, at,  $J$  1.9 Hz, H-2b), 4.36-4.41 (3H, m, H-4d,  $\text{CH}_2$ ), 4.44-4.92 (24H, m, 12 x  $\text{CH}_2$ ), 4.93 (1H, d H-1a), 5.25 (1H, d,  $J_{1,2}$  1.2 Hz, H-1b), 5.36 (1H, d,  $J_{1,2}$  1.2 Hz, H-1c), 5.45 (1H, d,  $J_{1,2}$  3.5 Hz, H-1d), 7.16-7.40 (65H, m, 65 x Ar-H);  $\delta_{\text{C}}$  (125 MHz,  $\text{CDCl}_3$ , assigned from HSQC) -5.3 (q, Me), 7.5 (q,  $\text{CH}_2\text{CH}_3$ ), 24.8 (t,  $\text{CH}_2\text{CH}_3$ ), 25.4 (q,  $\text{C}(\text{CH}_3)_3$ ), 62.5 (t, C-6a), 68.8 (t, C-6c), 69.5 (t, C-6b), 71.7 (t, C-6d), 68.4, 72.0, 73.0, 73.3, 74.6, 74.9 (t,  $\text{CH}_2$ ), 72.3 (d, C-5c), 72.5 (d, C-5b), 73.2 (d, C-5a), 74.4 (d, C-4c), 74.7 (d, C-2b), 74.8 (d, C-2c), 75.0 (2 x d, C-4a, C-4b), 75.8 (d, C-2d), 76.0 (d, C-4d), 76.4 (d, C-3d), 77.9 (d, C-2a), 78.8 (d, C-3c), 80.4 (d, C-3a), 80.5 (d, C-3b), 95.7 (d, C-1a), 96.6 (d, C-1d), 100.6 (d, C-1b), 101.1 (d, C-1c), 127.3 (d, Ar-C);  $m/z$  (ESI<sup>+</sup>) 2003 ( $\text{M}+\text{Na}^+$ , 100%); ( $\text{M}+\text{Na}^+$ ) measured peaks: 2001.9 (56%), 2002.9 (100%), 2003.9 (65%), 2004.9 (25%), 2005.9 (7%), 2006.9 (2%), 2007.9 (1%), calculated peaks: 2001.9

(71%), 2002.9 (100%), 2003.9 (75%), 2004.9 (40%), 2005.9 (16%), 2006.9 (6%), 2007.9 (2%).

**Benzyl (2,3,4,6-tetra-*O*-benzyl-5-*C*-methyl- $\alpha$ -D-mannopyranosyl)-(1 $\rightarrow$ 2)- 3,4,6-tri-*O*-benzyl- $\alpha$ -D-mannopyranosyl-(1 $\rightarrow$ 2)-3,4,6-tri-*O*-benzyl- $\alpha$ -D-mannopyranosyl-(1 $\rightarrow$ 3)-2,4-di-*O*-benzyl-6-*O*-*tert*-butyldimethylsilyl- $\alpha$ -D-mannopyranoside **23a****

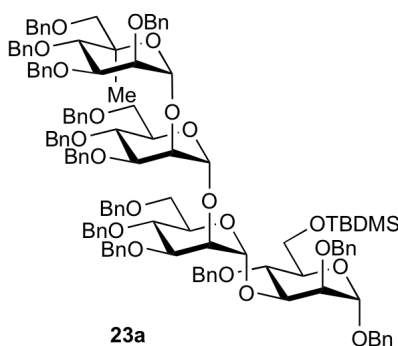

Benzyl (3,4,6-tri-*O*-benzyl- $\alpha$ -D-mannopyranosyl)-(1 $\rightarrow$ 2)-(3,4,6-tri-*O*-benzyl- $\alpha$ -D-mannopyranosyl)-(1 $\rightarrow$ 3)-2,4-di-*O*-benzyl-6-*O*-*tert*-butyldimethylsilyl- $\alpha$ -D-mannopyranoside **18** (102 mg, 0.071 mmol), phenyl 2,3,4,6-tetra-*O*-acetyl-5-*C*-methyl-1-thio-D-mannopyranoside **20a** (55 mg, 0.086 mmol) and 2,4,6-tri-*t*-butylpyrimidine (92 mg, 0.36 mmol) were dried in a dessicator overnight. The reagents were dissolved in DCM (1 mL) and transferred using a cannula to a flame dried flask containing 4Å molecular sieves. The mixture was stirred for 1 h and cooled to -20 °C. Dimethylthiosulfonium triflate (710  $\mu$ L of a 0.4 M solution in DCM) was added to the reaction mixture. After 1 h, t.l.c (5:1, petrol:ethyl acetate) indicated formation of a product ( $R_f$  0.5) with complete consumption of the starting materials ( $R_f$  0.1, 0.7). The reaction mixture was quenched with triethylamine (0.5 mL) and filtered through celite<sup>®</sup>. The filtrate was concentrated *in vacuo* and the residue purified by flash column chromatography (petrol $\rightarrow$ 6:1, petrol:ethyl acetate) to afford benzyl (2,3,4,6-tetra-*O*-benzyl-5-*C*-methyl- $\alpha$ -D-mannopyranosyl)-(1 $\rightarrow$ 2)- 3,4,6-tri-*O*-benzyl- $\alpha$ -D-mannopyranosyl-(1 $\rightarrow$ 2)-3,4,6-tri-*O*-benzyl- $\alpha$ -D-mannopyranosyl-(1 $\rightarrow$ 3)-2,4-di-*O*-benzyl-6-*O*-*tert*-butyldimethylsilyl- $\alpha$ -D-mannopyranoside **23a** (25 mg, 18%) as a colourless oil;  $[\alpha]_D^{25} +21$  ( $c$ , 1.0 in  $\text{CHCl}_3$ );  $\nu_{\text{max}}$  (thin film) no significant peaks;  $\delta_{\text{H}}$  (500 MHz,  $\text{CDCl}_3$ ) 0.09, 0.09 (6H, 2 x s, 2 x Me), 0.94 (9H, s,  $\text{C}(\text{CH}_3)_3$ ), 1.30 (3H, s Me),

3.40, 3.48 (2H, ABq,  $J$  10.5 Hz, H-6d, H-6'd), 3.51-3.53 (1H, d, H-6c), 3.63-3.72 (4H, m, H-5a, H-6b, H-6'b, H-6'c), 3.77-3.78 (2H, m, H-6a, H-6'a), 3.85-3.94 (6H, m, H-4a, H-3b, H-4b, H-2c, H-4c, H-5c, H-2d), 3.98 (1H, dd,  $J_{1,2}$  2.0 Hz,  $J_{2,3}$  2.9 Hz, H-2a), 4.01-4.06 (3H, m, H-5b, H-2c, H-3c), 4.10 (1H, dd,  $J_{2,3}$  2.8 Hz,  $J_{3,4}$  9.9 Hz, H-3d), 4.18 (1H, d,  $J_{3,4}$  9.4 Hz, H-3a), 4.30 (1H, bs, H-2b), 4.37-4.93 (2H, m, H-4d, CH), 4.45-4.95 (25H, m, 12 x CH<sub>2</sub>, CH), 4.93 (1H, d, H-1a), 5.28 (1H, d,  $J_{1,2}$  1.4 Hz, H-1b), 5.29 (1H, s, H-1c), 5.44 (1H, d,  $J_{1,2}$  2.0 Hz, H-1d), 7.14-7.34 (65H, m, 65 x Ar-H);  $\delta_C$  (125 MHz, CDCl<sub>3</sub>, assigned using HSQC) -5.3 (q, Me), 25.4 (q, C(CH<sub>3</sub>)<sub>3</sub>), 30.0 (q, Me), 62.3 (t, C-6a), 68.4 (C-6c), 68.8, 73.0, 73.6, 74.6 (t, CH<sub>2</sub>), 69.1 (t, C-6b), 72.3 (2 x d, C-5b, C-5c), 73.0 (d, C-5a), 74.6 (4 x d, C-4a, C-4b, C-4c, C-2b), 74.9 (d, C-2c), 75.2 (d, C-4d), 75.2 (t, C-6d), 75.6 (d, C-2d), 76.2 (d, C-3d), 77.8 (d, C-2a), 79.1 (d, C-3c), 79.8 (d, C-3a), 80.1 (d, C-3b), 95.6 (d, C-1a), 99.8 (d, C-1d), 100.1 (d, C-1b), 101.1 (d, C-1c), 127.6 (d, Ar-C);  $m/z$  (ESI<sup>+</sup>) 1989 (M+Na<sup>+</sup>, 100%); (M+Na<sup>+</sup>) peaks measured: 1987.9 (62%), 1988.9 (100%), 1989.9 (68%), 1990.9 (27%), 1991.9 (9%), peaks calculated: 1987.9 (72%), 1988.9 (100%), 1989.9 (75%), 1990.9 (39%), 1991.9 (16%).

**$\alpha$ -D-Mannopyranosyl-(1 $\rightarrow$ 2)- $\alpha$ -D-mannopyranosyl-(1 $\rightarrow$ 2)- $\alpha$ -D-mannopyranosyl-(1 $\rightarrow$ 3)-D-mannopyranose 3**

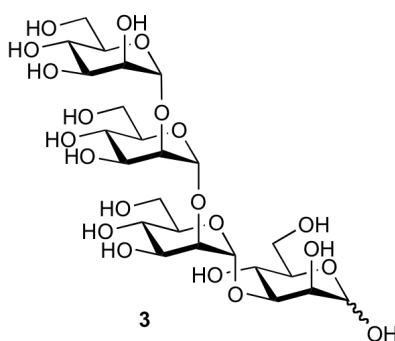

Sodium methoxide (1 mL of a 0.1 M solution in methanol) was added to a solution of benzyl 2-*O*-acetyl-3,4,6-tri-*O*-benzyl- $\alpha$ -D-mannopyranosyl-(1 $\rightarrow$ 2)- 3,4,6-tri-*O*-benzyl- $\alpha$ -D-mannopyranosyl-(1 $\rightarrow$ 2)-3,4,6-tri-*O*-benzyl- $\alpha$ -D-mannopyranosyl-(1 $\rightarrow$ 3)-2,4-di-*O*-benzyl-6-*O*-tert-butyltrimethylsilyl- $\alpha$ -D-mannopyranoside **25A** (24 mg, 0.013 mmol) in methanol (1 mL). After 18 h the reaction mixture was neutralized with acidified

DOWEX, filtered and concentrated *in vacuo*. The residue was suspended in acetic acid (80% in water) and heated at 50°C. After 24 h, t.l.c (2:1, petrol:ethyl acetate) indicated formation of a product ( $R_f$  0.2) with consumption of the starting material ( $R_f$  0.6). The reaction mixture was concentrated *in vacuo* and coevaporated with toluene (3 x 10 mL). The residue was purified by flash column chromatography (2:1, petrol:ethyl acetate). The desilylated product was dissolved in ethanol and palladium (10 mg of 10% palladium on carbon) was added. Hydrogen gas was bubbled through the solution until saturated. After 48 h under hydrogen, the reaction mixture was filtered through celite<sup>®</sup>, concentrated *in vacuo* and passed through a silica plug to afford  $\alpha$ -D-mannopyranosyl-(1 $\rightarrow$ 2)- $\alpha$ -D-mannopyranosyl-(1 $\rightarrow$ 2)- $\alpha$ -D-mannopyranosyl-(1 $\rightarrow$ 3)-D-mannopyranose **3** (5 mg, 60% over 3 steps) as an amorphous white solid; Partial assignment:  $\delta_H$  (500 MHz, D<sub>2</sub>O) 3.54-4.03 (24H, m), 4.82 (1H, s, H-1a $\beta$ ), 4.97 (1H, d,  $J_{1,2}$  1.2 Hz, H-1), 5.07 (1H, d,  $J_{1,2}$  1.6 Hz, H-1), 5.22 (1H, s, H-1a $\alpha$ ), 5.29 (1H, s, H-1);  $\delta_C$  (125 MHz, D<sub>2</sub>O) 60.8, 60.9, 61.0 (3 x t, C-6a, C-6b, C-6c, C-d), 66.0, 66.2, 66.7, 66.8, 66.9, 69.9, 70.0, 70.3, 70.9, 75.9, 78.0, 78.5, 78.6, 80.4 (14 x d, C-2a,b,c,d, C-3a,b,c,d, C-4a,b,c,d, C-5a,b,c,d), 93.5, 94.0, 100.5, 100.6, 102.2 (5 x d, C-1a $\alpha$ ,a $\beta$ ,b,c,d);  $m/z$  (ESI<sup>+</sup>) 689 (M+Na<sup>+</sup>, 100%); HRMS (ESI<sup>+</sup>) calcd. for C<sub>24</sub>H<sub>42</sub>O<sub>21</sub>Na (M+Na<sup>+</sup>) 689.2116. Found 689.2111.

**5-C-Methyl- $\alpha$ -D-mannopyranosyl-(1 $\rightarrow$ 2)- $\alpha$ -D-mannopyranosyl-(1 $\rightarrow$ 2)- $\alpha$ -D-mannopyranosyl-(1 $\rightarrow$ 3)-D-mannopyranose **4a****

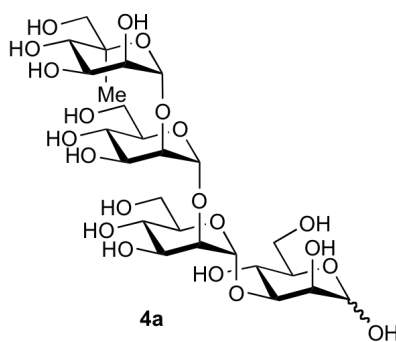

Benzyl (2,3,4,6-tetra-*O*-benzyl-5-*C*-methyl- $\alpha$ -D-mannopyranosyl)-(1 $\rightarrow$ 2)-3,4,6-tri-*O*-benzyl- $\alpha$ -D-mannopyranosyl-(1 $\rightarrow$ 2)-3,4,6-tri-*O*-benzyl- $\alpha$ -D-mannopyranosyl-(1 $\rightarrow$ 3)-2,4-di-*O*-benzyl-6-*O*-tert-butyltrimethylsilyl- $\alpha$ -D-mannopyranoside **23a** (25 mg, 0.013 mmol) was suspended in acetic acid (80% in water) and heated at 50°C. After 24 h, t.l.c (3:1,

petrol:ethyl acetate) indicated formation of a product ( $R_f$  0.2) with consumption of the starting material ( $R_f$  0.6). The reaction mixture was concentrated *in vacuo* and coevaporated with toluene (3 x 10 mL). The residue was purified by flash column chromatography (2:1, petrol:ethyl acetate). The desilylated product was dissolved in ethanol and palladium (10 mg of 10% palladium on carbon) was added. Hydrogen gas was bubbled through the solution until saturated. After 48 h under hydrogen, the reaction mixture was filtered through celite<sup>®</sup>, concentrated *in vacuo* and passed through a silica plug to afford **5-C-methyl- $\alpha$ -D-mannopyranosyl-(1 $\rightarrow$ 2)- $\alpha$ -D-mannopyranosyl-(1 $\rightarrow$ 2)- $\alpha$ -D-mannopyranosyl-(1 $\rightarrow$ 3)-D-mannopyranose **4a** (6 mg, 70% over 2 steps) as an amorphous white solid; Partial assignment:  $\delta_C$  (500 MHz, D<sub>2</sub>O) 1.22 (3H, s, Me), 3.30 (1H, ddd,  $J$  2.0 Hz,  $J$  6.2 Hz,  $J$  8.8 Hz, H-5), 3.44, 3.54 (2H, ABq,  $J$  12.0 Hz, H-6d, H-6'd), 3.59-4.08 (20 H, m), 4.82 (1H, s, H-1a $\beta$ ), 5.06 (1H, d,  $J_{1,2}$  1.9 Hz, H-1), 5.07 (1H,  $J_{1,2}$  1.5 Hz, H-1a $\alpha$ ), 5.22 (1H, s, H-1), 5.27 (1H, s, H-1);  $\delta_C$  (125 MHz, D<sub>2</sub>O) 18.3 (q, Me) 60.8 (t, C-6a,b,c), 66.5 (t, C-6d), 66.0, 66.3, 66.8, 67.1, 67.6, 70.1, 70.3, 70.5, 70.9, 72.5, 73.3, 75.9, 77.9, 78.1, 78.2 (16 x d, C-2a,b,c,d, C-3a,b,c,d, 4a,b,c,d, 5a,b,c), 80.4 (s, C-5d), 93.5, 94.0, 100.5, 100.7, 102.9 (5 x d, C-1a $\alpha$ , a $\beta$ , b, c, d);  $m/z$  (ESI<sup>+</sup>) 703 (M+Na<sup>+</sup>, 100%); HRMS (ESI<sup>+</sup>) calcd. for C<sub>25</sub>H<sub>44</sub>O<sub>21</sub>Na (M+Na<sup>+</sup>) 703.2267. Found 703.2265.**

**5-C-Ethyl- $\alpha$ -D-mannopyranosyl-(1 $\rightarrow$ 2)- $\alpha$ -D-mannopyranosyl-(1 $\rightarrow$ 2)- $\alpha$ -D-mannopyranosyl-(1 $\rightarrow$ 3)-D-mannopyranose **4b****

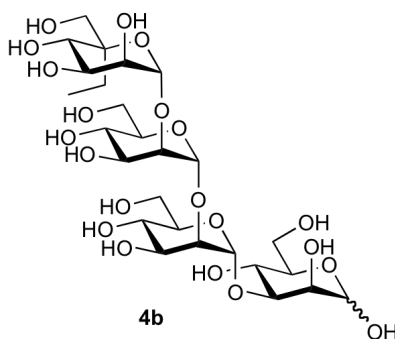

Benzyl (2,3,4,6-tetra-*O*-benzyl-5-*C*-ethyl- $\alpha$ -D-mannopyranosyl)-(1 $\rightarrow$ 2)-3,4,6-tri-*O*-benzyl- $\alpha$ -D-mannopyranosyl-(1 $\rightarrow$ 2)-3,4,6-tri-*O*-benzyl- $\alpha$ -D-mannopyranosyl-(1 $\rightarrow$ 3)-2,4-di-*O*-benzyl-6-*O*-tert-butyltrimethylsilyl- $\alpha$ -D-mannopyranoside **23b** (16 mg, 0.008 mmol) was suspended in acetic acid (80% in water) and heated at 50°C. After 24 h, t.l.c (3:1,

petrol:ethyl acetate) indicated formation of a product ( $R_f$  0.2) with consumption of the starting material ( $R_f$  0.6). The reaction mixture was concentrated *in vacuo* and coevaporated with toluene (3 x 10 mL). The residue was purified by flash column chromatography (2:1, petrol:ethyl acetate). The desilylated product was dissolved in ethanol and palladium (10 mg of 10% palladium on carbon) was added. Hydrogen gas was bubbled through the solution until saturated. After 48 h under hydrogen, the reaction mixture was filtered through celite<sup>®</sup>, concentrated *in vacuo* and passed through a silica plug to afford 5-*C*-ethyl- $\alpha$ -D-mannopyranosyl-(1 $\rightarrow$ 2)- $\alpha$ -D-mannopyranosyl-(1 $\rightarrow$ 2)- $\alpha$ -D-mannopyranosyl-(1 $\rightarrow$ 3)-D-mannopyranose **4b** (4 mg, 78% over 2 steps) as a white amorphous solid; Partial assignment:  $\delta_H$  (500 MHz, D<sub>2</sub>O) 0.84 (3H, t,  $J$  7.5 Hz, CH<sub>3</sub>), 1.57-1.76 (2H, m, CH<sub>2</sub>), 3.34 (1H, ddd,  $J$  2.5 Hz,  $J$  6.5 Hz,  $J$  9.5 Hz, H-5), 3.53 (1H, d,  $J$  11.5 Hz, H-6d), 3.60-4.09 (H, m), 4.83 (1H, s, H-1a $\beta$ ), 5.04 (1H, d,  $J_{1,2}$  5.5 Hz, H-1), 5.09 (1H, d,  $J_{1,2}$  1.5 Hz, H-1a $\alpha$ ), 5.23 (1H, s, H-1), 5.30 (1H, s, H-1);  $m/z$  (ESI<sup>+</sup>) 717 (M+Na<sup>+</sup>, 100%); HRMS (ESI<sup>+</sup>) calcd. for C<sub>26</sub>H<sub>46</sub>O<sub>21</sub>Na (M+Na<sup>+</sup>) 717.2424. Found 717.2424.

**Benzyl-(2,3,4,6-tetra-*O*-benzyl-6-*S*-6-*C*-methyl- $\alpha$ -D-mannopyranosyl)-(1 $\rightarrow$ 2)-3,4,6-tri-*O*-benzyl- $\alpha$ -D-mannopyranosyl-(1 $\rightarrow$ 2)-3,4,6-tri-*O*-benzyl- $\alpha$ -D-mannopyranosyl-(1 $\rightarrow$ 3)-2,4-di-*O*-benzyl-6-*O*-tert-butylidimethylsilyl- $\alpha$ -D-mannopyranoside **24A****

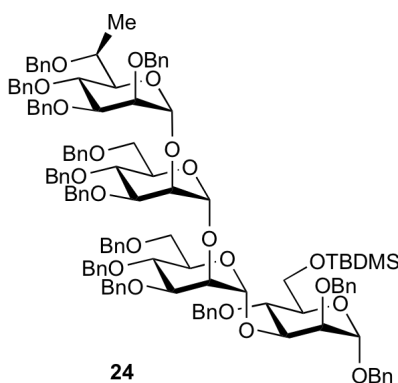

Benzyl (3,4,6-tri-*O*-benzyl- $\alpha$ -D-mannopyranosyl)-(1 $\rightarrow$ 2)-(3,4,6-tri-*O*-benzyl- $\alpha$ -D-mannopyranosyl)-(1 $\rightarrow$ 3)-2,4-di-*O*-benzyl-6-*O*-tert-butylidimethylsilyl- $\alpha$ -D-mannopyranoside **18A** (95 mg, 0.067 mmol), phenyl 2,3,4,6-tetra-*O*-benzyl-6-*S*-6-*C*-methyl-1-thio- $\alpha$ -D-mannopyranoside **21** (52 mg, 0.080 mmol) and 2,4,6-tri-*t*-butylpyrimidine (87 mg, 0.34 mmol) were dried in a dessicator overnight. The reagents



were dissolved in DCM (1 mL) and transferred using a cannula to a flame dried flask containing 4Å molecular sieves. The mixture was stirred for 1 h and cooled to -78 °C. Dimethylthiosulfonium triflate (69 mg, 0.27 mmol) was added to the reaction mixture and after 30 min the reaction mixture was allowed to warm to room temperature. After a further 1 h, t.l.c (5:1, petrol:ethyl acetate) indicated formation of a product ( $R_f$  0.6) with complete consumption of the starting materials ( $R_f$  0.1, 0.7). The reaction mixture was quenched with triethylamine (0.5 mL) and filtered through celite<sup>®</sup>. The filtrate was concentrated *in vacuo* and the residue purified by flash column chromatography (petrol→6:1, petrol:ethyl acetate) to afford benzyl-(2,3,4,6-tetra-*O*-benzyl-6-*S*-6-*C*-methyl- $\alpha$ -D-mannopyranosyl)-(1→2)-3,4,6-tri-*O*-benzyl- $\alpha$ -D-mannopyranosyl-(1→2)-3,4,6-tri-*O*-benzyl- $\alpha$ -D-mannopyranosyl-(1→3)-2,4-di-*O*-benzyl-6-*O*-tert-butyltrimethylsilyl- $\alpha$ -D-mannopyranoside **24A** (65 mg, 55%) as a colourless oil;  $[\alpha]_D^{25} +15$  (*c*, 1.0 in CHCl<sub>3</sub>);  $\nu_{max}$  (thin film) no significant peaks;  $\delta_H$  (700 MHz, CDCl<sub>3</sub>) 0.04, 0.05 (6H, 2 x s, 2 x Me), 0.90 (9H, s, CH(CH<sub>3</sub>)<sub>3</sub>), 1.13 (3H, d, *J* 6.5 Hz, 6-Me), 3.47 (2H, at, *J* 10.8 Hz, H-6c, H-5d), 3.60-3.74 (6H, m, H-6a, H-6'a, H-6b, H-6'b, H-6c, H-5a), 3.78-3.87 (6H, m, H-2d, H-4a, H-4b, H-4c, H-5c, H-6d), 3.90 (1H, dd, *J*<sub>2,3</sub> 2.9 Hz, *J*<sub>3,4</sub> 9.4 Hz, H-3d), 3.93 (1H, dd, *J*<sub>2,3</sub> 2.5 Hz, *J*<sub>3,4</sub> 9.2 Hz, H-3b), 3.96 (1H, dd, *J*<sub>1,2</sub> 1.9 Hz, *J*<sub>2,3</sub> 2.5 Hz, H-2a), 3.98-4.00 (1H, m, H-5b), 4.00 (1H, d, *J*<sub>2,3</sub> 2.5 Hz, *J*<sub>3,4</sub> 9.3 Hz, H-3c), 4.14 (1H, at, *J* 2.2 Hz, H-2c), 4.16 (1H, dd, *J*<sub>2,3</sub> 3.0 Hz, *J*<sub>3,4</sub> 9.5 Hz, H-3a), 4.17-4.20), 2H, m, H-2b, H-4d), 4.31 (2H, d, *J* 12.2 Hz, 2 x CH), 4.35 (1H, d, *J* 11.5 Hz, CH), 4.36-4.67 (20H, m, 20 x CH), 4.77 (1H, d, *J* 11.8 Hz, CH), 4.83 (1H, d, *J* 11.0 Hz, CH), 4.90 (1H, d, *J*<sub>1,2</sub> 1.3 Hz, H-1a), 4.92 (1H, d, *J* 11.1 Hz, CH), 5.23 (1H, d, *J*<sub>1,2</sub> 1.5 Hz, H-1b), 5.26 (1H, s, H-1c), 5.40 (1H, s, H-1d), 7.13-7.35 (65H, m, 65 x Ar-H);  $\delta_C$  (175 MHz, CDCl<sub>3</sub>) 1.0 (q, Me), 15.2 (q, 6-Me), 25.9 (q, C(CH<sub>3</sub>)<sub>3</sub>), 62.4 (t, H-6a), 68.5 (t, CH<sub>2</sub>), 68.8 (t, C-6c), 69.2 (t, C-6b), 70.3 (t, CH<sub>2</sub>), 71.2 (d, C-6d), 71.5, 71.6, 72.0 (3 x t, CH<sub>2</sub>), 72.4 (d, C-5c), 72.6 (d, C-5b), 72.7 (t, CH<sub>2</sub>), 73.0 (t, CH<sub>2</sub>), 73.1 (d, C-5a), 73.1 (d, C-2c), 73.4 (d, C-2b), 73.9 (d, C-2d), 74.6 (d, C-4d), 74.6 (d, C-4a, C-4b, C-4c), 74.8, 74.8, 74.9 (t, CH<sub>2</sub>), 74.9 (d, C-5d), 77.8 (d, C-2a), 79.4 (d, C-3c), 79.9 (d, C-3b), 80.0 (d, C-3d), 80.2 (d, C-3a), 95.7 (d, C-1a), 98.4 (d, C-1d), 99.9 (d, C-1b), 101.0 (d, C-1c); *m/z* (ESI<sup>+</sup>) 1988 (M+Na<sup>+</sup>, 100%); (M+Na<sup>+</sup>) peaks measured: 1987.9 (67%), 1988.9 (100%), 1989.9

(69%), 1990.9 (35%), 1991.9 (14%), 1992.9 (5%) calculated peaks: 1987.9 (72%), 1988.9 (100%), 1989.9 (75%), 1990.9 (39%), 1991.9 (15%), 1992.9 (5%).

**6-C-Methyl- $\alpha$ -D-mannopyranosyl-(1 $\rightarrow$ 2)- $\alpha$ -D-mannopyranosyl-(1 $\rightarrow$ 2)- $\alpha$ -D-mannopyranosyl-(1 $\rightarrow$ 3)-D-mannopyranose **5****

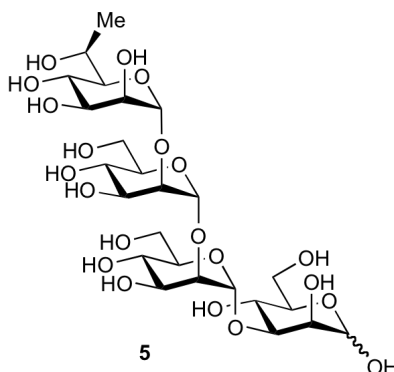

Benzyl-(2,3,4,6-tetra-*O*-benzyl-6-*S*-6-*C*-methyl- $\alpha$ -D-mannopyranosyl)-(1 $\rightarrow$ 2)-3,4,6-tri-*O*-benzyl- $\alpha$ -D-mannopyranosyl-(1 $\rightarrow$ 2)-3,4,6-tri-*O*-benzyl- $\alpha$ -D-mannopyranosyl-(1 $\rightarrow$ 3)-2,4-di-*O*-benzyl-6-*O*-tert-butyldimethylsilyl- $\alpha$ -D-mannopyranoside **24A** (96 mg, 0.049 mmol) was suspended in acetic acid (80% in water) and heated at 50°C. After 48 h, t.l.c (5:1, petrol:ethyl acetate) indicated formation of a product ( $R_f$  0.1) with consumption of the starting material ( $R_f$  0.6). The reaction mixture was concentrated *in vacuo* and coevaporated with toluene (3 x 10 mL). The residue was purified by flash column chromatography (2:1, petrol:ethyl acetate). The desilylated product was dissolved in ethanol and palladium (10 mg of 10% palladium on carbon) was added. Hydrogen gas was bubbled through the solution until saturated. After 48 h under hydrogen, the reaction mixture was filtered through celite<sup>®</sup>, concentrated *in vacuo* and passed through a silica plug to afford 6-*C*-methyl- $\alpha$ -D-mannopyranosyl-(1 $\rightarrow$ 2)- $\alpha$ -D-mannopyranosyl-(1 $\rightarrow$ 2)- $\alpha$ -D-mannopyranosyl-(1 $\rightarrow$ 3)-D-mannopyranose **5** (30 mg, 90% over 2 steps) as an amorphous white solid;  $\delta_H$  (500 MHz, D<sub>2</sub>O) 1.23 (3H, d,  $J$  6.7 Hz, CH<sub>3</sub>), 3.41-4.11 (23H, m, 23 x CH), 4.61 (1H, s, H-1a $\beta$ ), 5.01 (1H, s, H-1), 5.06 (1H, s, H-1a $\alpha$ ), 5.15 (1H, s, H-1), 5.27 (1H, s, H-1);  $\delta_C$  (125 MHz, D<sub>2</sub>O) 19.0 (q, Me), 60.8, 60.9 (t, C-6a, C-6b, C-6c), 64.7 (d, C-6d), 65.9, 66.2, 66.7, 66.9, 67.0, 69.9, 70.0, 70.1, 70.4, 70.5, 72.5, 73.0, 74.9, 75.9, 77.9, 78.1, 78.8, 80.6 (d, C-2a, C-3a, C-4a, C-5a, C-2b, C-3b, C-4b, C-5b, C-2c, C-3c, C-4c, C-5c, C-2d, C-3d, C-4d, C-5d), 93.5 (d, C-1a $\beta$ ), 94.0 (d, C-1a $\alpha$ ), 100.7 (d, C-1),

100.8(d, C-1), 102.1 (d, C-1);  $m/z$  (ESI<sup>+</sup>) 679 (M+H<sup>+</sup>, 100%); HRMS (ESI<sup>+</sup>) calcd. for C<sub>25</sub>H<sub>43</sub>O<sub>21</sub> (M+H<sup>+</sup>) 679.2302. Found 679.2302.

**Benzyl-(2,3,4-tri-*O*-benzyl- $\alpha$ -D-rhamnopyranosyl)-(1 $\rightarrow$ 2)-3,4,6-tri-*O*-benzyl- $\alpha$ -D-mannopyranosyl-(1 $\rightarrow$ 2)-3,4,6-tri-*O*-benzyl- $\alpha$ -D-mannopyranosyl-(1 $\rightarrow$ 3)-2,4-di-*O*-benzyl-6-*O*-tert-butyltrimethylsilyl- $\alpha$ -D-mannopyranoside **22****

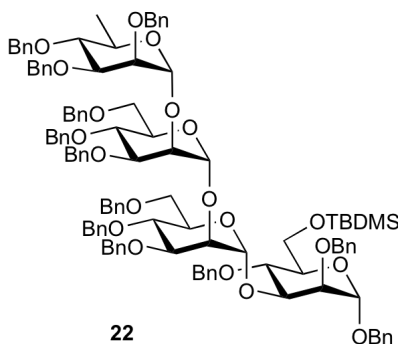

Benzyl (3,4,6-tri-*O*-benzyl- $\alpha$ -D-mannopyranosyl)-(1 $\rightarrow$ 2)-(3,4,6-tri-*O*-benzyl- $\alpha$ -D-mannopyranosyl)-(1 $\rightarrow$ 3)-2,4-di-*O*-benzyl-6-*O*-tert-butyltrimethylsilyl- $\alpha$ -D-mannopyranoside **18A** (62 mg, 0.043 mmol), phenyl 2,3,4-tri-*O*-benzyl-thio- $\alpha$ -D-rhamnopyranoside **19** (27 mg, 0.052 mmol) and 2,4,6-tri-*t*-butylpyrimidine (56 mg, 0.22 mmol) were dried in a desiccator overnight. The reagents were dissolved in DCM (1 mL) and transferred using a cannula to a flame dried flask containing 4Å molecular sieves. The mixture was stirred for 1 h and cooled to -78 °C. Dimethylthiosulfonium triflate (44 mg, 0.17 mmol) was added to the reaction mixture and after 30 min the reaction mixture was allowed to warm to room temperature. After a further 1 h, t.l.c (5:1, petrol:ethyl acetate) indicated formation of a product ( $R_f$  0.6) with complete consumption of the starting materials ( $R_f$  0.1, 0.7). The reaction mixture was quenched with triethylamine (0.5 mL) and filtered through celite<sup>®</sup>. The filtrate was concentrated *in vacuo* and the residue purified by flash column chromatography (petrol $\rightarrow$ 6:1, petrol:ethyl acetate) to afford benzyl-(2,3,4-tri-*O*-benzyl- $\alpha$ -D-rhamnopyranosyl)-(1 $\rightarrow$ 2)-3,4,6-tri-*O*-benzyl- $\alpha$ -D-mannopyranosyl-(1 $\rightarrow$ 2)-3,4,6-tri-*O*-benzyl- $\alpha$ -D-mannopyranosyl-(1 $\rightarrow$ 3)-2,4-di-*O*-benzyl-6-*O*-tert-butyltrimethylsilyl- $\alpha$ -D-mannopyranoside **22** (39 mg, 49%) as a colourless oil;  $[\alpha]_D^{25} +19$  (*c*, 1.0 in CHCl<sub>3</sub>);  $\nu_{max}$  (thin film) no significant peaks;  $\delta_H$  (700 MHz, CDCl<sub>3</sub>) 0.06, 0.07 (6H, 2 x s, 2 x Me), 0.91 (9H, s, C(CH<sub>3</sub>)<sub>3</sub>), 1.25 (3H, d, *J* 6.3 Hz,

CH<sub>3</sub>), 3.50 (1H, d, *J* 9.9 Hz, H-6c), 3.60-3.63 (2H, m, H-5a, H-4d), 3.66-3.69 (2H, m, H-6'c, H-6b), 3.70-3.77 (3H, m, H-6'b, H-6a, H-6'a), 3.81-3.86 (5H, m, H-2d, H-4a, H-4b, H-4c, H-5d), 3.87-3.90 (3H, m, H-5c, H-3b, H-3d), 3.95 (1H, dd, *J*<sub>1,2</sub> 1.9 Hz, *J*<sub>2,3</sub> 2.9 Hz, H-2a), 3.98-4.01 (3H, m, H-2c, H-3c, H-5b), 4.15 (1H, dd, *J*<sub>2,3</sub> 2.9 Hz, *J*<sub>3,4</sub> 9.5 Hz, H-3a), 4.20 (1H, bs, H-2b), 4.34 (1H, d, *J* 12.4 Hz, CH), 4.42-4.67 (17H, m, 17 x CH), 4.74 (1H, d, *J* 11.4 Hz, CH), 4.82 (1H, d, *J* 10.9 Hz, CH), 4.89 (1H, d, *J* 11.5 Hz, CH), 4.90 (1H, s, H-1a), 4.97 (1H, d, *J* 10.9 Hz, CH), 5.15 (1H, d, *J*<sub>1,2</sub> 1.3 Hz, H-1b), 5.19 (1H, d, *J*<sub>1,2</sub> 1.2 Hz, H-1d), 5.28 (1H, s, H-1c), 7.14-7.34 (60H, m, 60 x Ar-H); δ<sub>c</sub> (175 MHz, CDCl<sub>3</sub>) 1.0 (q, Me), 18.0 (q, Rham Me), 25.6 (q, C(CH<sub>3</sub>)<sub>3</sub>), 62.2 (t, C-6a), 68.3 (d, C-2d), 68.6 (t, CH<sub>2</sub>), 68.7 (t, C-6c), 69.4 (t, C-6b), 71.7, 71.9, 72.2 (3 x t, CH<sub>2</sub>), 72.2 (d, C-5c), 72.5 (d, C-5b), 72.9, 73.1 (2 x t, CH<sub>2</sub>), 73.2 (d, C-5a), 73.8 (d, C-2b), 74.7 (t, CH<sub>2</sub>), 74.7 (d, C-4a, C-4b, C-4c, C-5d), 74.9, 75.2 (t, CH<sub>2</sub>), 75.1 (d, C-2c), 78.0 (d, C-2a), 79.1 (d, C-3c), 79.5 (d, C-3d), 79.8 (d, C-3b), 80.4 (d, C-3a), 80.6 (d, C-4d), 95.9 (d, C-1a), 98.9 (d, C-1d), 100.8 (d, C-1b), 101.3 (d, C-1c); *m/z* (ESI<sup>+</sup>) 1868 (M+Na<sup>+</sup>, 100%); (M+Na<sup>+</sup>) peaks measured: 1867.9 (75%), 1868.9 (100%), 1869.9 (81%), 1870.9 (61%), 1871.9 (25%), 1872.9 (7%), 1873.9 (5%); calculated peaks: 1867.9 (74%), 1868.9 (100%), 1869.9 (68%), 1870.9 (61%), 1871.9 (23%), 1872.9 (10%), 1873.9 (5%).

**α-D-Rhamnopyranosyl-(1→2)-α-D-mannopyranosyl-(1→2)-α-D-mannopyranosyl-(1→3)-D-mannopyranose 7**

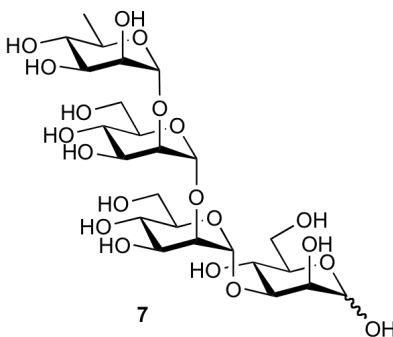

Benzyl-(2,3,4-tri-*O*-benzyl-α-D-rhamnopyranosyl)-(1→2)-3,4,6-tri-*O*-benzyl-α-D-mannopyranosyl-(1→2)-3,4,6-tri-*O*-benzyl-α-D-mannopyranosyl-(1→3)-2,4-di-*O*-benzyl-6-*O*-tert-butylidimethylsilyl-α-D-mannopyranoside **22** (110 mg, 0.060 mmol) was suspended in acetic acid (80% in water) and heated at 50°C. After 48 h, t.l.c (4:1,

petrol:ethyl acetate) indicated formation of a product ( $R_f$  0.1) with consumption of the starting material ( $R_f$  0.6). The reaction mixture was concentrated *in vacuo* and coevaporated with toluene (3 x 10 mL). The residue was purified by flash column chromatography (2:1, petrol:ethyl acetate). The desilylated product was dissolved in ethanol and palladium (10 mg of 10% palladium on carbon) was added. Hydrogen gas was bubbled through the solution until saturated. After 48 h under hydrogen, the reaction mixture was filtered through celite<sup>®</sup>, concentrated *in vacuo* and passed through a silica plug to afford  $\alpha$ -D-rhamnopyranosyl-(1 $\rightarrow$ 2)- $\alpha$ -D-mannopyranosyl-(1 $\rightarrow$ 2)- $\alpha$ -D-mannopyranosyl-(1 $\rightarrow$ 3)-D-mannopyranose **7** ( mg, % over 2 steps) as an amorphous white solid;  $\delta_H$  (500 MHz, D<sub>2</sub>O) 1.09 (3H, d,  $J$  6.0 Hz, CH<sub>3</sub>- $\beta$ ), 1.19 (3H, d,  $J$  6.3 Hz, CH<sub>3</sub>- $\alpha$ ), 3.36 (1H, at,  $J$  9.7 Hz, CH), 3.61-4.03 (21H, m, 21 x CH), 4.82 (1H, s, H-1a $\beta$ ), 4.89 (1H, s, H-1), 5.07 (1H, s, H-1a $\alpha$ ), 5.12 (1H, s, H-1), 5.25 (1H, s, H-1);  $\delta_C$  (125 MHz, D<sub>2</sub>O) 16.5 (q, Me), 60.8, 60.9 (2 x t, C-6a, C-6b, C-6c), 66.1, 66.3, 66.7, 66.9, 69.0, 70.0, 70.2, 70.4, 70.9, 72.0, 72.5, 73.3, 75.9, 77.9, 78.1, 78.2, 80.4 (d, C-2a, C-3a, C-4a, C-5a, C-2b, C-3b, C-4b, C-5b, C-2c, C-3c, C-4c, C-5c, C-2d, C-3d, C-4d, C-5d), 93.5 (d, C-1a $\beta$ ), 93.9 (d, C-1a $\alpha$ ), 100.6, 100.8, 102.1 (d, C-1b, C-1c, C-1d);  $m/z$  (ESI<sup>+</sup>) 649 (M+H<sup>+</sup>, 100%); HRMS (ESI<sup>+</sup>) calcd. for C<sub>24</sub>H<sub>41</sub>O<sub>20</sub> (M+H<sup>+</sup>) 649.2197. Found 649.2199.

### 1.6 Tetrasaccharide synthesis with linker:

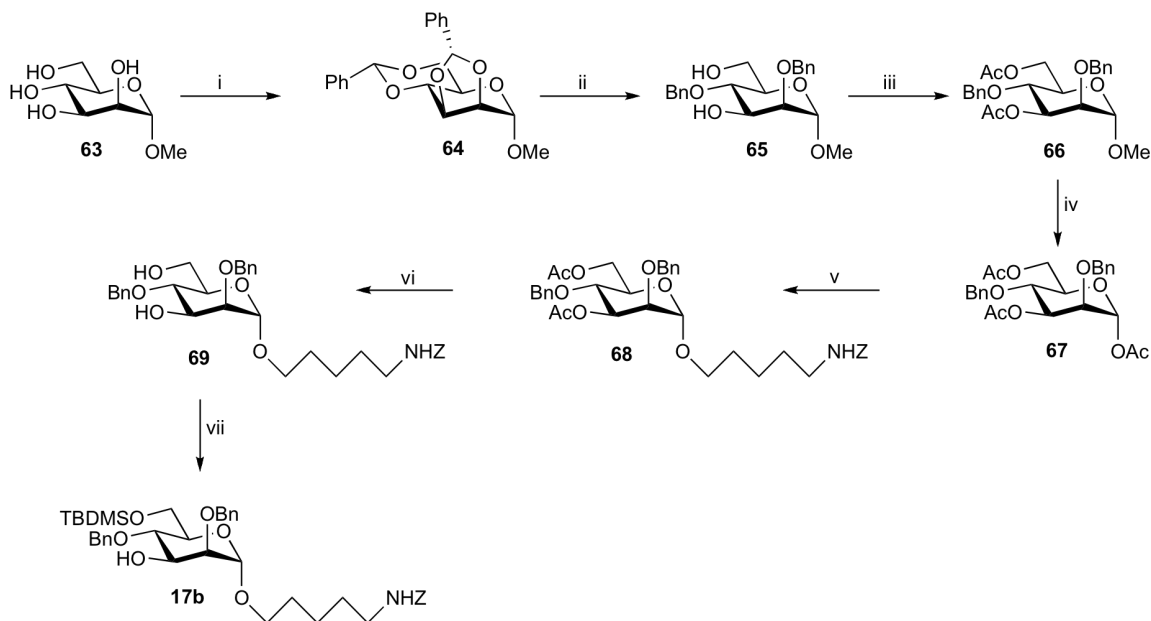

Scheme S13: i) Dimethylacetyl, *p*TsOH, DMF, 75°C, 86%, ii) BH<sub>3</sub>.THF, Bu<sub>2</sub>BOTf, THF, 0°C, iii) Ac<sub>2</sub>O, Pyrindine, 100%, iv) c.H<sub>2</sub>SO<sub>4</sub>, AcOH, Ac<sub>2</sub>O, 0°C, 99%, v) BF<sub>3</sub>OEt<sub>2</sub>, DCM, Linker, 86%, vi) NaOMe, MeOH, 100%, vii) TBDMSCl, Imidazole, DMF, 0°C, 90%.

**Methyl (R),(R)-2,3:4,6-di-*O*-benzylidene- $\alpha$ -D-mannopyranoside and Benzyl (S),(R)-2,3:4,6-di-*O*-benzylidene- $\alpha$ -D-mannopyranoside **64****

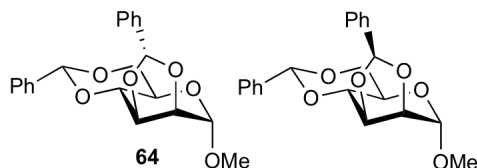

Dimethoxybenzaldehyde (34 mL, 222 mmol) was added to a solution of methyl- $\alpha$ -D-mannopyranoside **63** (20 g, 103 mmol) and *para*-toluenesulfonic acid (703 mg, 3.70 mmol) in anhydrous DMF (100 mL) (17). The reaction mixture was heated to 75 °C on a rotary evaporator at 200 mbar. After 4 h, t.l.c (4:1, petrol:ethyl acetate) indicated formation of a product ( $R_f$  0.9) with consumption of the starting material ( $R_f$  0). The reaction mixture was concentrated *in vacuo* and residue co-evaporated with toluene. The residue was dissolved in DCM (300 mL) and washed with sodium hydrogen carbonate and brine (200 mL each of a saturated aqueous solution). The organic phase was dried (MgSO<sub>4</sub>), filtered and concentrated *in vacuo*. The residue was recrystallised (ethyl acetate/methanol) to afford the exo anomer benzyl (S),(R)-2,3:4,6-di-*O*-benzylidene- $\alpha$ -D-mannopyranoside (14 g, 37%) as a white crystalline solid. The mother liquor was purified by flash column chromatography (9:1, petrol:ethyl acetate) and recrystallisation (ethanol) to afford the endo anomer benzyl (R),(R)-2,3:4,6-di-*O*-benzylidene- $\alpha$ -D-mannopyranoside **64** (18.6 g, 48%) as a white crystalline solid.

Exo:  $[\alpha]_D^{23}$  -0.5 (*c*, 1.0 in CHCl<sub>3</sub>), [Lit.  $[\alpha]_D$  -1.9 (*c*, 0.76 in CHCl<sub>3</sub>)](17);  $\delta_H$  (400 MHz, CDCl<sub>3</sub>) 3.42 (3H, s, OMe), 3.84-3.94 (3H, m, H-4, H-5, H-6), 4.17 (1H, d,  $J_{2,3}$  5.5 Hz, H-2), 4.38 (1H, d,  $J$  5.3 Hz, H-6'), 4.65 (1H, dd,  $J_{3,4}$  7.9 Hz, H-3), 5.03 (1H, s, H-1), 5.66 (1H, s, CHPh), 6.31 (1H, s, CHPh), 7.35-7.56 (10H, m, 10 x Ar-H).

Endo:  $[\alpha]_D^{23}$  +0.5 (*c*, 2.0 in CHCl<sub>3</sub>), [Lit.  $[\alpha]_D$  +0.3 (*c*, 0.68 in CHCl<sub>3</sub>)](17);  $\delta_H$  (400 MHz, CDCl<sub>3</sub>) 3.44 (3H, m, H-4, H-5, H-6), 4.31 (1H, d,  $J_{2,3}$  6.3 Hz, H-2), 4.33 (1H, dd,  $J_{5,6}$  4.2 Hz,  $J_{6,6'}$  9.8 Hz, H-6'), 4.49 (1H, at,  $J$  6.5 Hz, H-3), 5.10 (1H, s, H-1), 5.55 (1H, s, CHPh), 5.99 (1H, s, CHPh), 7.33-7.58 (10H, m, 10 x Ar-H).

**Methyl 2,4-di-*O*-benzyl- $\alpha$ -D-mannopyranoside 65**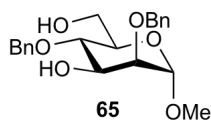

(R),(R)-2,3:4,6-Di-*O*-benzylidene- $\alpha$ -D-mannopyranoside **64** (5 g, 13.4 mmol) was dissolved in anhydrous THF (50 mL) and cooled to 0 °C. Borane.THF complex (77 mL of a 1 M solution in THF) was added to the reaction mixture (18). After 5 min, Bu<sub>2</sub>BOTf (10.6 mL of a 1 M solution in DCM) was added slowly to the reaction mixture. After 4 h, t.l.c. (4:1, petrol:ethyl acetate) indicated formation of a product (R<sub>f</sub> 0) with consumption of the starting material (R<sub>f</sub> 0.8). Triethylamine (2 mL) was added to the reaction mixture followed by slow addition of methanol (10 mL) at 0 °C. When no more hydrogen was produced the reaction mixture was concentrated *in vacuo* and the residue purified by flash column chromatography (4:1→1:1, petrol:ethyl acetate) to afford methyl 2,4-di-*O*-benzyl- $\alpha$ -D-mannopyranoside **65** (4.5 g, 89%) as a colourless oil;  $[\alpha]_D^{23} +22.1$  (*c*, 2.0 in CHCl<sub>3</sub>), [Lit.  $[\alpha]_D^{23} +23.5$  (*c*, 0.77 in CHCl<sub>3</sub>)] (19);  $\nu_{\max}$  (thin film) 3420 (OH, br) cm<sup>-1</sup>;  $\delta_H$  (400 MHz, CDCl<sub>3</sub>) 3.34 (3H, s, OMe), 3.61 (1H, ddd,  $J_{5,6}$  3.0 Hz,  $J_{5,6}$  4.3 Hz,  $J_{4,5}$  9.6 Hz, H-5), 3.70 (1H, at,  $J$  9.4 Hz, H-4), 3.75 (1H, dd,  $J_{1,2}$  1.5 Hz,  $J_{2,3}$  3.7 Hz, H-2), 3.80 (1H, dd,  $J_{6,6'}$  11.9 Hz, H-6), 3.88 (1H, dd, H-6'), 4.01 (1H, dd,  $J_{3,4}$  9.0 Hz, H-3), 4.63 (1H, d,  $J$  11.9 Hz, CHH'a), 4.68 (1H, d,  $J$  11.1 Hz, CHH'b), 4.74 (1H, d, CHH'a), 4.77 (1H, d, H-1), 4.92 (1H, d, CHH'b), 7.28-7.42 (10H, m, 10 x Ar-H);  $\delta_C$  (100 MHz, CDCl<sub>3</sub>) 54.9 (q, OMe), 62.3 (t, C-6), 71.2 (d, C-5), 71.7 (d, C-3), 73.1, 74.9 (t, 2 x CH<sub>2</sub>), 76.4 (d, C-4), 78.4 (d, C-2), 98.2 (d, C-1), 127.8-128.6 (d, Ar-C), 137.8, 138.4 (2 x s, 2 x Ar-C); *m/z* (ESI<sup>+</sup>) 392 (M+NH<sub>4</sub><sup>+</sup>, 100%); HRMS (ESI<sup>+</sup>) calcd. for C<sub>21</sub>H<sub>26</sub>NO<sub>6</sub>Na (M+Na<sup>+</sup>) 397.1619. Found 397.1622.

**Methyl 2,4-di-*O*-benzyl-3,6-di-*O*-acetyl- $\alpha$ -D-mannopyranoside 66**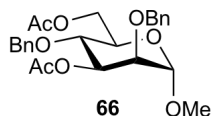

Methyl 2,4-di-*O*-benzyl- $\alpha$ -D-mannopyranoside **65** (4.5 g, 12.0 mmol) was stirred in acetic anhydride (50 mL) and pyridine (50 mL). After 20 h, t.l.c. (2:1, petrol:ethyl acetate) indicated formation of a product (R<sub>f</sub> 0.5) with consumption of the starting

material ( $R_f$  0.1). The reaction mixture was concentrated *in vacuo* and co-evaporated with toluene. The residue was purified by flash column chromatography (2:1, petrol:ethyl acetate) to afford methyl 2,4-di-*O*-benzyl-3,6-di-*O*-acetyl- $\alpha$ -D-mannopyranoside **66** (5.5 g, 100%) as a colourless oil;  $[\alpha]_D^{23} +4.1$  (*c*, 2.0 in  $\text{CHCl}_3$ ), [Lit.  $[\alpha]_D +12.6$  (*c*, 1.36)] (20);  $\nu_{\text{max}}$  (thin film) 1740 (C=O, s)  $\text{cm}^{-1}$ ;  $\delta_{\text{H}}$  (400 MHz,  $\text{CDCl}_3$ ) 1.99, 2.09 (6H, 2 x s, 2 x OAc), 3.37 (3H, s, OMe), 3.84-3.89 (2H, m, H-2, H-5), 3.95 (1H, at,  $J$  9.3 Hz, H-4), 4.31 (1H, dd,  $J_{5,6}$  4.8 Hz,  $J_{6,6'}$  11.9 Hz, H-6), 4.37 (1H, dd,  $J_{5,6}$  2.2 Hz, H-6'), 4.58 (1H, d,  $J$  12.1 Hz,  $\text{CHH}'\text{a}$ ), 4.60 (1H, d,  $J$  11.1 Hz,  $\text{CHH}'\text{b}$ ), 4.68 (1H, d,  $\text{CHH}'\text{b}$ ), 4.72 (1H, d,  $\text{CHH}'\text{a}$ ), 4.75 (1H, d,  $J_{1,2}$  1.7 Hz, H-1), 5.24 (1H, dd,  $J_{2,3}$  3.3 Hz,  $J_{3,4}$  9.4 Hz, H-3), 7.27-7.37 (10H, m, 10 x Ar-H).

### 2,4-*O*-Benzyl-1,3,6-tri-*O*-acetyl- $\alpha$ -D-mannopyranose **67**

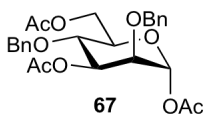

Sulfuric acid (1 mL of a concentrated solution) was added to methyl 2,4-di-*O*-benzyl-3,6-di-*O*-acetyl- $\alpha$ -D-mannopyranoside **66** (4.95 g, 10.8 mmol) in acetic anhydride (60 mL) and acetic acid (30 mL) at  $-10$  °C. After 2 h, sodium acetate (6 g) was added to the reaction mixture which was then concentrated *in vacuo*. The residue was dissolved in ethyl acetate (100 mL) and washed with water (200 mL). The aqueous phase was re-extracted with ethyl acetate (3 x 50 mL) and the combined organic phases were washed with sodium hydrogen carbonate (100 mL of a saturated aqueous solution), dried ( $\text{MgSO}_4$ ), filtered and concentrated *in vacuo*. The residue was purified by flash column chromatography (2:1, petrol:ethyl acetate) to afford 2,4-*O*-benzyl-1,3,6-tri-*O*-acetyl- $\alpha$ -D-mannopyranose **67** (5.18 g, 99%) as a colourless oil;  $[\alpha]_D^{23} +10.7$  (*c*, 2.0 in  $\text{CHCl}_3$ ) [Lit.  $[\alpha]_D +31.1$  (*c*, 0.09)] (20);  $\nu_{\text{max}}$  (thin film) 1742 (C=O, s)  $\text{cm}^{-1}$ ;  $\delta_{\text{H}}$  (400 MHz,  $\text{CDCl}_3$ ) 1.99, 2.07, 2.10 (9H, 3 x s, 3 x OAc), 3.88 (1H, dd,  $J_{1,2}$  2.0 Hz,  $J_{2,3}$  3.3 Hz, H-2), 3.97 (1H, dd,  $J_{5,6}$  2.3 Hz,  $J_{5,6}$  4.1 Hz,  $J_{4,5}$  9.9 Hz, H-5), 4.03 (1H, at,  $J$  9.3 Hz, H-4), 4.30 (1H, dd,  $J_{6,6'}$  11.6 Hz, H-6), 4.35 (1H, dd, H-6'), 4.57 (1H, d,  $J$  12.1 Hz,  $\text{CHH}'\text{a}$ ), 4.61 (1H, d,  $J$  11.1 Hz,  $\text{CHH}'\text{b}$ ), 4.73 (1H, d,  $\text{CHH}'\text{b}$ ), 4.74 (1H, d,  $\text{CHH}'\text{a}$ ), 5.23 (1H, dd,  $J_{3,4}$  9.4 Hz, H-3),



6.19 (1H, d, H-1), 7.28-7.37 (10H, m, 10 x Ar-H);  $m/z$  (ESI<sup>+</sup>) 504 (M+NH<sub>4</sub><sup>+</sup>, 100%); HRMS (ESI<sup>+</sup>) calcd. for C<sub>26</sub>H<sub>30</sub>NO<sub>9</sub>Na (M+Na<sup>+</sup>) 509.1780. Found 509.1782.

**5-(Benzyloxycarbonylamino)pentyl-3,6-di-O-acetyl-2,4-di-O-benzyl- $\alpha$ -D-mannopyranoside 68**

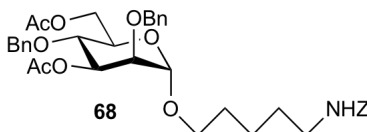

Boron trifluorodiethyletherate (1.45 mL of a 1 M solution in DCM) was added to a solution of 2,4-*O*-benzyl-1,3,6-tri-*O*-acetyl- $\alpha$ -D-mannopyranose **67** (2.2 g, 4.6 mmol) and 5-(*Z*-amino)-1-pentanol (2.2 g, 9.2 mmol) in anhydrous DCM (25 mL) at 0 °C. The reaction mixture was allowed to warm to room temperature. After 8 h, t.l.c (2:1, petrol:ethyl acetate) indicated formation of a product ( $R_f$  0.2) with consumption of the starting material ( $R_f$  0.3). Triethylamine (2 mL) was added to the reaction mixture which was then concentrated *in vacuo*. The residue was purified by flash column chromatography (2:1, petrol:ethyl acetate) to afford 5-(benzyloxycarbonylamino)pentyl-3,6-di-*O*-acetyl-2,4-di-*O*-benzyl- $\alpha$ -D-mannopyranoside **68** (2.6 g, 86%) as a colourless oil;  $[\alpha]_D^{23} +12.4$  ( $c$ , 2.0 in CHCl<sub>3</sub>);  $\nu_{\max}$  (thin film) 1740 (C=O, s) cm<sup>-1</sup>;  $\delta_H$  (400 MHz, CDCl<sub>3</sub>) 1.34-1.40 (2H, m, CH<sub>2</sub>-3), 1.49-1.54 (2H, m, CH<sub>2</sub>-2), 1.54-1.62 (2H, m, CH<sub>2</sub>-4), 2.00, 2.08 (6H, 2 x s, 2 x OAc), 3.17-3.22 (2H, m, CH<sub>2</sub>-1), 3.36-3.42 (1H, m, CH<sub>2</sub>-5), 3.64-3.70 (1H, m, CH<sub>2</sub>-5'), 3.85-3.89 (2H, m, H-2, H-5), 3.95 (1H, at,  $J$  9.6 Hz, H-4), 4.31 (1H, dd,  $J_{5,6}$  4.5 Hz,  $J_{6,6'}$  11.9 Hz, H-6), 4.36 (1H, dd,  $J_{5,6'}$  2.5 Hz, H-6'), 4.58 (1H, d,  $J$  12.2 Hz, CHH'a), 4.59 (1H, d,  $J$  11.1 Hz, CHH'b), 4.67 (1H, d, CHH'a), 4.71 (1H, d, CHH'b), 4.82 (1H, d,  $J_{1,2}$  1.5 Hz, H-1), 4.91 (1H, bs, NH), 5.10 (2H, s, CH<sub>2</sub>-Z), 5.26 (1H, dd,  $J_{2,3}$  3.3 Hz,  $J_{3,4}$  9.4 Hz, H-3), 7.27-7.37 (15H, m, 15 x Ar-H);  $\delta_C$  (100 MHz, CDCl<sub>3</sub>) 20.9, 21.0 (2 x q, 2 x OAc), 23.5 (t, CH<sub>2</sub>-3), 28.9, 29.8 (2 x t, CH<sub>2</sub>-2, CH<sub>2</sub>-4), 40.9 (t, CH<sub>2</sub>-1), 63.4 (t, C-6), 66.5 (t, CH<sub>2</sub>-Z), 67.8 (t, CH<sub>2</sub>-5), 69.7 (d, C-5), 72.9 (t, CH<sub>2</sub>Ph), 73.4 (d, C-3), 73.9 (d, C-4), 74.8 (t, CH<sub>2</sub>Ph), 75.9 (d, C-2), 97.7 (d, C-1), 127.8-128.5 (d, Ar-C), 136.7, 137.8, 137.9 (s, Ar-C), 156.4 (s, N-C=O), 170.1, 170.9 (2 x s, O-C=O);  $m/z$  (ESI<sup>+</sup>) 681 (M+NH<sub>4</sub><sup>+</sup>, 100%);  $m/z$  (ESI<sup>+</sup>) 686 (M+Na<sup>+</sup>, 100%); HRMS (ESI<sup>+</sup>) calcd. for C<sub>37</sub>H<sub>45</sub>NO<sub>10</sub>Na (M+Na<sup>+</sup>) 686.2936. Found 686.2923.

**5-(Benzyloxycarbonylamino)pentyl-2,4-di-O-benzyl- $\alpha$ -D-mannopyranoside 69**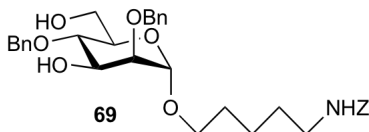

Sodium methoxide (50 mg, 0.9 mmol) was added to a solution of 5-(benzyloxycarbonylamino)pentyl-3,6-di-O-acetyl-2,4-di-O-benzyl- $\alpha$ -D-mannopyranoside **68** (2.6 g, 3.9 mmol) in methanol (50 mL). After 4h, t.l.c (1:1, petrol:ethyl acetate) indicated formation of a product ( $R_f$  0.1) with consumption of the starting material ( $R_f$  0.5). The reaction mixture was neutralized with DOWEX, filtered and concentrated *in vacuo* to afford 5-(benzyloxycarbonylamino)pentyl-2,4-di-O-benzyl- $\alpha$ -D-mannopyranoside **69** (2.1 g, 98%) as a colourless oil;  $[\alpha]_D^{23} +15.3$  (c, 2.0 in  $\text{CHCl}_3$ );  $\nu_{\text{max}}$  (thin film) 3420 (OH, br), 1703 (C=O, s)  $\text{cm}^{-1}$ ;  $\delta_{\text{H}}$  (400 MHz,  $\text{CDCl}_3$ ) 1.31-1.38 (2H, m,  $\text{CH}_2$ -3), 1.47-1.57 (4H, m,  $\text{CH}_2$ -2,  $\text{CH}_2$ -4), 3.16-3.21 (2H, m,  $\text{CH}_2$ -1), 3.32-3.37 (1H, m,  $\text{CHH}'$ -5), 3.58-3.69 (3H, m,  $\text{CHH}'$ -5, H-5, H-4), 3.73 (1H, dd,  $J_{1,2}$  1.3 Hz,  $J_{2,3}$  3.6 Hz, H-2), 3.78 (1H, dd,  $J_{5,6}$  4.5 Hz,  $J_{6,6'}$  11.9 Hz, H-6), 3.87 (1H, dd,  $J_{5,6'}$  2.8 Hz, H-6'), 4.00 (1H, dd,  $J_{3,4}$  9.6 Hz, H-3), 4.62 (1H, d,  $J$  11.6 Hz,  $\text{CHH}'$ a), 4.67 (1H, d,  $J$  11.1 Hz,  $\text{CHH}'$ b), 4.74 (1H, d,  $\text{CHH}'$ a), 4.83 (1H, s, H-1), 4.92 (1H, d,  $\text{CHH}'$ b), 5.09 (2H, s,  $\text{CH}_2$ -Z), 7.28-7.41 (15H, m, 15 x Ar-H);  $\delta_{\text{C}}$  (100 MHz,  $\text{CDCl}_3$ ) 23.3 (t,  $\text{CH}_2$ -3), 28.9, 29.7 (2 x t,  $\text{CH}_2$ -2,  $\text{CH}_2$ -4), 40.9 (t,  $\text{CH}_2$ -1), 62.4 (t, C-6), 67.4 (t,  $\text{CH}_2$ -5), 71.3 (d, C-5), 71.9 (d, C-3), 73.1, 75.0 (2 x t, 2 x  $\text{CH}_2$ ), 76.6 (d, C-4), 78.5 (d, C-2), 97.1 (d, C-1), 127.8-128.6 (d, Ar-C), 136.6, 137.7, 138.3 (s, Ar-C), 156.9 (s, C=O);  $m/z$  (ESI<sup>+</sup>) 602 ( $\text{M}+\text{Na}^+$ , 100%); HRMS (ESI<sup>+</sup>) calcd. for  $\text{C}_{33}\text{H}_{41}\text{NO}_8\text{Na}$  ( $\text{M}+\text{Na}^+$ ) 602.2724. Found 602.2718.

**5-(Benzyloxycarbonylamino)pentyl-2,4-di-O-benzyl-6-O-tert-butylidimethylsilyl- $\alpha$ -D-mannopyranoside 17B**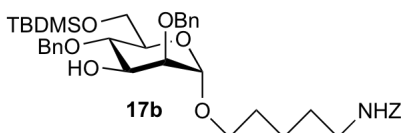

TBDMSCl (352 mg, 2.34 mmol) was added to a solution of 5-(benzyloxycarbonylamino)pentyl-2,4-di-O-benzyl- $\alpha$ -D-mannopyranoside **69** (1.34 g, 2.34

mmol) and imidazole (627 mg, 9.36 mmol) in anhydrous DMF (20 mL) at 0 °C. After 1 h, t.l.c (3:1, petrol:ethyl acetate) indicated formation of a product ( $R_f$  0.3) with consumption of the starting material ( $R_f$  0). Methanol (1 mL) was added to the reaction mixture which was then concentrated *in vacuo*. The residue was suspended in ethyl acetate (100 mL) and washed with ammonium chloride (100 mL of a saturated aqueous solution). The aqueous phase was re-extracted with ethyl acetate (2 x 100 mL) and the combined organic phases were dried ( $MgSO_4$ ), filtered and concentrated *in vacuo*. The residue was purified by flash column chromatography (3:1, petrol:ethyl acetate) to afford 5-(benzyloxycarbonylamino)pentyl-2,4-di-*O*-benzyl-6-*O*-*tert*-butyldimethylsilyl- $\alpha$ -D-mannopyranoside **17B** (1.45 g, 90 %) as a colourless oil;  $[\alpha]_D^{23} +14.1$  (*c*, 2.0 in  $CHCl_3$ );  $\nu_{max}$  (thin film) 3240 (OH, br), 1705 (C=O, s)  $cm^{-1}$ ;  $\delta_H$  (400 MHz,  $CDCl_3$ ) 0.10, 0.11 (6H, 2 x s, 2 x Me), 0.93 (9H, s,  $C(CH_3)_3$ ), 1.33-1.39 (2H, m,  $CH_2$ -3), 1.48-1.59 (4H, m,  $CH_2$ -2,  $CH_2$ -4), 2.42 (1H, d, *J* 9.6 Hz, OH), 3.17-3.22 (2H, m,  $CH_2$ -1), 3.33-3.38 (1H, m,  $CHH'$ -5), 3.55-3.59 (1H, m,  $CHH'$ -5), 3.64-3.69 (2H, m, H-4, H-5), 3.72 (1H, dd,  $J_{1,2}$  1.5 Hz,  $J_{2,3}$  3.8 Hz, H-2), 3.84-3.90 (2H, m, H-6, H-6'), 4.01 (1H, dat,  $J_d$  3.8 Hz,  $J_t$  9.4 Hz, H-3), 4.60 (1H, d, *J* 11.8 Hz,  $CHH'$ a), 4.66 (1H, d, *J* 10.8 Hz,  $CHH'$ b), 4.74 (1H, d,  $CHH'$ a), 4.82 (1H, bs, NH), 4.88 (1H, s, H-1), 4.92 (1H, d,  $CHH'$ b), 5.11 (2H, s,  $CH_2$ -Z), 7.29-7.39 (15H, m, 15 x Ar-H);  $\delta_C$  (100 MHz,  $CDCl_3$ ) -5.3, -5.1 (2 x q, 2 x Me), 18.3 (s,  $C(CH_3)_3$ ), 23.4 (t,  $CH_2$ -3), 25.9 (q,  $C(CH_3)_3$ ), 29.1, 29.8 (2 x t,  $CH_2$ -2,  $CH_2$ -4), 40.9 (t,  $CH_2$ -1), 62.7 (t, C-6), 66.6 (t,  $CH_2$ -Z), 67.1 (t,  $CH_2$ -5), 71.9 (d, C-3), 72.3 (d, C-4), 72.7 (t,  $CH_2$ Ph), 74.9 (t,  $CH_2$ Ph), 76.6 (d, C-5), 78.7 (d, C-2), 96.5 (d, C-1), 127.7-128.5 (d, Ar-C), 136.7, 137.9, 138.7 (s, Ar-C), 156.4 (s, C=O).

### Synthesis of linker tetrasaccharides

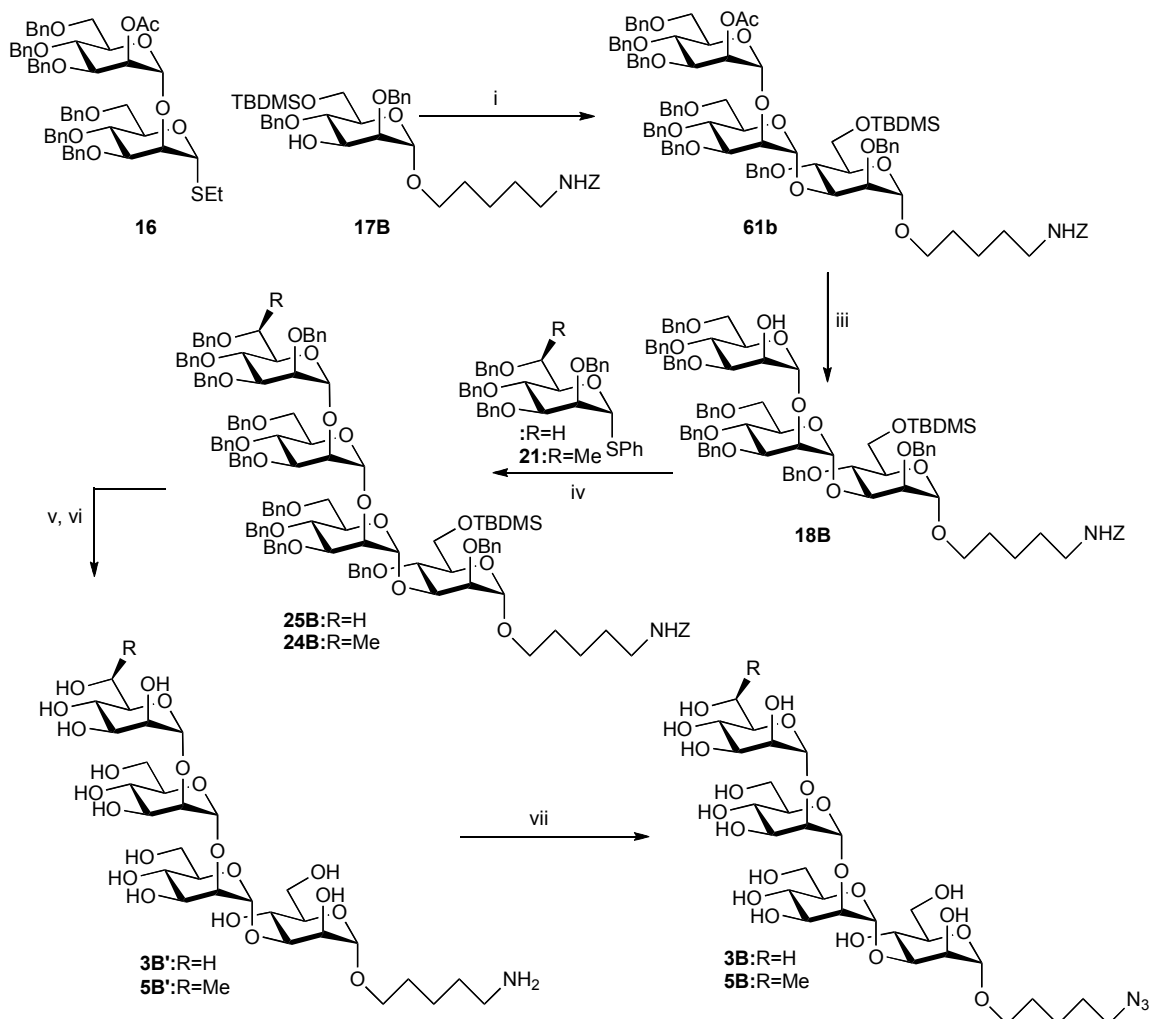

Scheme S14: i) DMTST, TTBP, DCM,  $-78^{\circ}\text{C}$ -RT, 4A molecular sieves, 80%, ii) NaOMe, MeOH, 90%, iii) DMTST, TTBP, DCM,  $-78^{\circ}\text{C}$ -RT, 4A molecular sieves, **3b**: 44%, **5b**: 49%, v) AcOH,  $\text{H}_2\text{O}$ ,  $50^{\circ}\text{C}$ , vi)  $\text{H}_2$ , Pd/C, MeOH, vii)  $\text{TfN}_3$ ,  $\text{CuCl}_2$ ,  $\text{NH}_4\text{HCO}_3$ , DCM,  $\text{H}_2\text{O}$ , **3c**: 77%, **5c**: 91%.

**5-(Benzyloxycarbonylamino)pentyl-** (2-*O*-acetyl-3,4,6-tri-*O*-benzyl- $\alpha$ -D-mannopyranosyl)-(1 $\rightarrow$ 2)-(3,4,6-tri-*O*-benzyl- $\alpha$ -D-mannopyranosyl)-(1 $\rightarrow$ 3)-2,4-di-*O*-benzyl-6-*O*-*tert*-butyldimethylsilyl- $\alpha$ -D-mannopyranoside **61b**

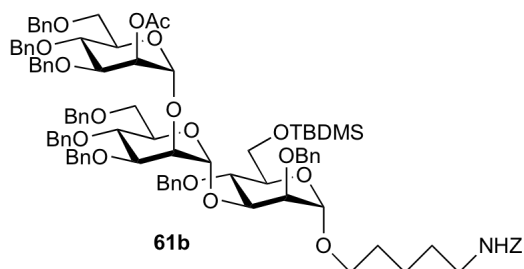

5-(Benzyloxycarbonylamino)pentyl 2,4-di-*O*-benzyl-6-*O*-*tert*-butyldimethylsilyl- $\alpha$ -D-mannopyranoside **17B** (90 mg, 0.13 mmol), ethyl 2-*O*-acetyl-3,4,6-*O*-benzyl- $\alpha$ -D-mannopyranosyl-(1 $\rightarrow$ 2)-3,4,6-tri-*O*-benzyl-thio- $\alpha$ -D-mannopyranoside **16** (151 mg, 0.16 mmol) and 2,6-di-*tert*-butyl-4-methylpyridine (168 mg, 0.65 mmol) were dried in a dessicator overnight. The reagents were dissolved in DCM (2 mL) and transferred using a cannula to a flame dried flask containing 4Å molecular sieves. The mixture was stirred for 1 h and cooled to -78 °C. DMTST (134 mg, 0.52 mmol) was added and the mixture was stirred at -78 °C under an atmosphere of argon and after 30 min the reaction was allowed to warm to room temperature. After 1 h, t.l.c (3:1, petrol:ethyl acetate) indicated formation of a product ( $R_f$  0.6) with complete consumption of the starting materials ( $R_f$  0.7, 0.3). The reaction mixture was quenched with triethylamine (0.5 mL) and filtered through celite. The filtrate was concentrated *in vacuo* and the residue purified by flash column chromatography (petrol $\rightarrow$ 5:1, petrol:ethyl acetate) to afford 5-(benzyloxycarbonylamino)pentyl- 2-*O*-acetyl-3,4,6-tri-*O*-benzyl- $\alpha$ -D-mannopyranosyl)-(1 $\rightarrow$ 2)-(3,4,6-tri-*O*-benzyl- $\alpha$ -D-mannopyranosyl)-(1 $\rightarrow$ 3)-2,4,di-*O*-benzyl-6-*O*-*tert*-butyldimethylsilyl- $\alpha$ -D-mannopyranoside **61b** (145 mg, 80%) as a colourless oil.  $[\alpha]_D^{25} +25.4$  (*c*, 1.0 in CHCl<sub>3</sub>);  $\nu_{\max}$  (thin film) 1743, 1723 (C=O, s) cm<sup>-1</sup>;  $\delta_H$  (500 MHz, CDCl<sub>3</sub>) 0.02, 0.04 (6H, 2 x s, 2 x Me), 0.88 (9H, s, C(CH<sub>3</sub>)<sub>3</sub>), 1.23-1.30 (2H, m, CH<sub>2</sub>-3), 1.41-1.51 (4H, m, CH<sub>2</sub>-2, CH<sub>2</sub>-4), 2.12 (3H, s, OAc), 3.10-3.14 (2H, m, CH<sub>2</sub>-1), 3.24-3.29 (1H, m, CHH'-5), 3.45 (1H, ad,  $J$  9.8 Hz, H-6c), 3.53 (1H, atd,  $J_d$  9.5 Hz,  $J_t$  3.8 Hz, H-5a), 3.57-3.68 (4H, m, CHH'-5, H-6'c, H-6b, H-6'b), 3.73 (2H, ad,  $J$  3.2 Hz, H-6a, H-6'a), 3.79-3.93 (5H, m, H-2a, H-4a, H-4b, H-4c, H-5c), 3.96-4.02 (4H, m, H-2b, H-3b, H-3c, H-5b), 4.07 (1H, dd,  $J_{2,3}$  3.2 Hz,  $J_{3,4}$  9.5 Hz, H-3a), 4.33 (1H, d,  $J$  12.3 Hz, CH), 4.38 (1H, d,  $J$  11.0 Hz, CH), 4.42 (1H, d,  $J$  11.0 Hz, CH), 4.48-4.65 (10H, m, 10 x CH), 4.73 (1H, d,  $J$  11.7 Hz, CH), 4.77 (1H, d,  $J_{1,2}$  0.9 Hz, H-1a), 4.81 (1H, d,  $J$  10.8 Hz, CH), 5.08 (3H, d,  $J$  2.5 Hz, CH<sub>2</sub>-Z, H-1c), 5.20 (1H, d,  $J_{1,2}$  1.3 Hz, H-1b), 5.53 (1H, dd,  $J_{2,3}$  2.8 Hz, H-2c), 7.12-7.36 (45H, m, 45 x Ar-H);  $\delta_C$  (125 MHz, CDCl<sub>3</sub>) -5.3, -5.2 (2 x q, 2 x Me), 18.3 (s, C(CH<sub>3</sub>)<sub>3</sub>), 21.2 (q, OAc), 23.4 (t, CH<sub>2</sub>-3), 25.9 (q, C(CH<sub>3</sub>)<sub>3</sub>), 28.9, 29.7 (2 x t, CH<sub>2</sub>-2, CH<sub>2</sub>-4), 40.9 (t, CH<sub>2</sub>-1), 62.3 (t, C-6a), 66.5 (t, CH<sub>2</sub>-Z), 67.2 (t, CH<sub>2</sub>-5), 68.7 (d, C-2c), 69.6 (t, C-6c), 71.8 (t, C-6b), 71.9 (t, CH<sub>2</sub>), 71.9 (d, C-5c), 72.1 (t, CH<sub>2</sub>), 72.5 (d, C-5b), 73.1 (d, C-5a), 71.2, 73.1 (2 x t, 2 x CH<sub>2</sub>), 74.1 (d, C-4a), 74.8 (d, C-4b, C-4c),

74.9 (d, C-2b), 75.0 (t, CH<sub>2</sub>), 77.2 (d, C-2a, C-3c), 78.1 (d, C-3b), 79.5 (d, C-3a), 96.8 (d, C-1a), 99.2 (d, C-1c), 101.0 (d, C-1b), 127.30128.4 (d, Ar-C), 136.7, 138.0, 138.6 (s, Ar-C), 156.3, 170.1 (s, C=O); *m/z* (ESI<sup>+</sup>) 1618 (M+NH<sub>4</sub><sup>+</sup>, 100%); (M+Na<sup>+</sup>) peaks measured: 1622.7 (94%), 1623.7 (100%), 1624.7 (56%), 1625.7 (21%), 1626.7 (7%), 1627.7 (2%) calculated peaks: 1622.7 (91%), 1623.7 (100%), 1624.7 (61%), 1625.7 (26%), 1626.7 (8%), 1627.7 (2%).

**5-(Benzyloxycarbonylamino)pentyl- (3,4,6-tri-*O*-benzyl- $\alpha$ -D-mannopyranosyl)-(1 $\rightarrow$ 2)-(3,4,6-tri-*O*-benzyl- $\alpha$ -D-mannopyranosyl)-(1 $\rightarrow$ 3)-2,4,di-*O*-benzyl-6-*O*-*tert*-butyldimethylsilyl- $\alpha$ -D-mannopyranoside **18B****

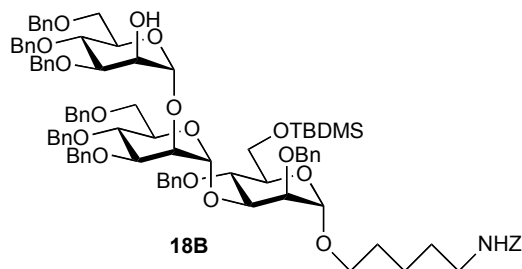

5-(Benzyloxycarbonylamino)pentyl- (2-*O*-acetyl-3,4,6-tri-*O*-benzyl- $\alpha$ -D-mannopyranosyl)-(1 $\rightarrow$ 2)-(3,4,6-tri-*O*-benzyl- $\alpha$ -D-mannopyranosyl)-(1 $\rightarrow$ 3)-2,4,di-*O*-benzyl-6-*O*-*tert*-butyldimethylsilyl- $\alpha$ -D-mannopyranoside **17B** (145 mg, 0.091 mmol) was dissolved in methanol (2 mL) and sodium methoxide (0.2 mL of a 0.1 M solution in methanol) was added. After 24 h, t.l.c. (3:1, petrol:ethyl acetate) showed formation of a product (*R<sub>f</sub>* 0.1) and complete consumption of the starting material (*R<sub>f</sub>* 0.4). Ammonium chloride (a drop of a saturated aqueous solution) was added followed by sodium hydrogen carbonate (20 mL of a saturated aqueous solution). The mixture was extracted with DCM (3 x 50 mL) and the combined organic layers dried (MgSO<sub>4</sub>), filtered and concentrated *in vacuo*. The residue was purified by flash column chromatography (2:1, petrol:ethyl acetate) to afford 5-(benzyloxycarbonylamino)pentyl- (3,4,6-tri-*O*-benzyl- $\alpha$ -D-mannopyranosyl)-(1 $\rightarrow$ 2)-(3,4,6-tri-*O*-benzyl- $\alpha$ -D-mannopyranosyl)-(1 $\rightarrow$ 3)-2,4,di-*O*-benzyl-6-*O*-*tert*-butyldimethylsilyl- $\alpha$ -D-mannopyranoside **18B** (128 mg, 90 %) as a colourless oil; [ $\alpha$ ]<sub>D</sub><sup>23</sup> +34.2 (*c*, 1.0 in CHCl<sub>3</sub>);  $\nu_{\max}$  (thin film) 3424 (OH, br), 1723 (C=O, s) cm<sup>-1</sup>;  $\delta_{\text{H}}$  (500 MHz, CDCl<sub>3</sub>) 0.04, 0.05 (6H, 2 x s, 2 x Me), 0.89 (9H, s, C(CH<sub>3</sub>)<sub>3</sub>), 1.25-

1.31 (2H, m, CH<sub>2</sub>-3), 1.41-1.50 (4H, m, CH<sub>2</sub>-2, CH<sub>2</sub>-4), 3.10-3.14 (2H, m, CH<sub>2</sub>-1), 3.26-3.30 (1H, m, CHH'-5), 3.50 (1H, ad, *J* 10.4 Hz, H-6c), 3.54 (1H, atd, *J* 9.4 Hz, *J* 4.1 Hz, H-5a), 3.59-3.69 (4H, m, CHH'-5, H-6b, H-6'b, H-6'c), 3.74 (2H, s, H-6a, H-6'a), 3.78-3.91 (6H, m, H-2a, H-3c, H-4a, H-4b, H-4c, H-5c), 3.98-4.04 (3H, m, H-2b, H-3b, H-5b), 4.08 (1H, dd, *J*<sub>2,3</sub> 3.1 Hz, *J*<sub>3,4</sub> 9.4 Hz, H-3a), 4.12 (1H, bs, H-2c), 4.28 (1H, d, *J* 12.3 Hz, CH), 4.47 (1H, d, *J* 11.0 Hz, CH), 4.50-4.63 (11H, m, 11 x CH), 4.74 (1H, d, *J* 11.4 Hz, CH), 4.78 (1H, s, H-1a), 4.79 (1H, d, *J* 11.0 Hz, CH), 5.09 (2H, s, CH<sub>2</sub>-Z), 5.15 (1H, s, H-1c), 5.24 (1H, d, *J*<sub>1,2</sub> 1.3 Hz, H-1b), 7.15-7.37 (45H, m, 45 x Ar-H); δ<sub>c</sub> (125 MHz, CDCl<sub>3</sub>) -5.3, -5.1 (2 x q, 2 x Me), 18.3 (s, C(CH<sub>3</sub>)<sub>3</sub>), 23.4 (t, CH<sub>2</sub>-3), 25.9 (q, C(CH<sub>3</sub>)<sub>3</sub>), 29.0, 29.7 (2 x t, CH<sub>2</sub>-2, CH<sub>2</sub>-4), 40.9 (t, CH<sub>2</sub>-1), 62.7 (t, C-6a), 66.5 (t, CH<sub>2</sub>-Z), 67.3 (t, CH<sub>2</sub>-5), 68.5 (d, C-2c), 68.5 (t, C-6c), 69.6 (t, C-6b), 71.6 (d, C-5c), 71.9, 72.1 (2 x t, 2 x CH<sub>2</sub>), 72.3 (d, C-5b), 72.6 (t, CH<sub>2</sub>), 73.1 (d, C-5a), 73.2, 73.3 (2 x t, 2 x CH<sub>2</sub>), 74.2, 74.7 (2 x d, C-4a, C-4b, C-4c), 74.9, 75.0 (2 x t, 2 x CH<sub>2</sub>), 75.2 (d, C-2b), 78.1 (d, C-2a), 79.5 (d, C-3b), 79.9 (2 x d, C-3a, C-3c), 96.8 (d, C-1a), 100.9 (d, C-1c), 101.6 (d, C-1b), 127.3-128.5 (d, Ar-C), 136.7-138.7 (s, Ar-C), 156.3 (s, C=O); *m/z* (ESI<sup>+</sup>) 1576 (M+NH<sub>4</sub><sup>+</sup>, 100%); (M+Na<sup>+</sup>) peaks measured: 1580.7 (94%), 1581.7 (100%), 1582.7 (59%), 1583.7 (23%), 1584.7 (8%), 1585.7 (2%) calculated peaks: 1580.7 (93%), 1581.7 (100%), 1582.7 (60%), 1583.7 (25%), 1584.7 (8%), 1585.7 (2%).

**5-(Benzyloxycarbonylamino)pentyl-(2,3,4,6-tetra-*O*-benzyl-6-*S*-6-*C*-methyl- $\alpha$ -D-mannopyranosyl)-(1 $\rightarrow$ 2)- 3,4,6-tri-*O*-benzyl- $\alpha$ -D-mannopyranosyl-(1 $\rightarrow$ 2)-3,4,6-tri-*O*-benzyl- $\alpha$ -D-mannopyranosyl-(1 $\rightarrow$ 3)-2,4-di-*O*-benzyl-6-*O*-tert-butyldimethylsilyl- $\alpha$ -D-mannopyranoside 24B**

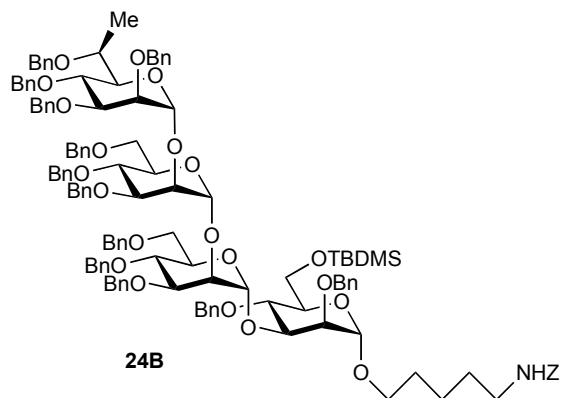

5-(Benzyloxycarbonylamino)pentyl- (2-*O*-acetyl-3,4,6-tri-*O*-benzyl- $\alpha$ -D-mannopyranosyl)-(1 $\rightarrow$ 2)-(3,4,6-tri-*O*-benzyl- $\alpha$ -D-mannopyranosyl)-(1 $\rightarrow$ 3)-2,4-di-*O*-benzyl-6-*O*-*tert*-butyldimethylsilyl- $\alpha$ -D-mannopyranoside **18B** (66 mg, 0.042 mmol), phenyl 2,3,4,6-tetra-*O*-benzyl-6-*S*-6-*C*-methyl-1-thio- $\alpha$ -D-mannopyranoside **21** (33 mg, 0.051 mmol) and 2,4,6-tri-*t*-butylpyrimidine (54 mg, 0.21 mmol) were dried in a dessicator overnight. The reagents were dissolved in DCM (1 mL) and transferred using a cannula to a flame dried flask containing 4Å molecular sieves. The mixture was stirred for 1 h and cooled to -78 °C. Dimethylthiosulfonium triflate (43 mg, 0.168 mmol) was added to the reaction mixture and after 30 min the reaction mixture was allowed to warm to room temperature. After a further 1 h, t.l.c (3:1, petrol:ethyl acetate) indicated formation of a product ( $R_f$  0.5) with complete consumption of the starting materials ( $R_f$  0.2, 0.7). The reaction mixture was quenched with triethylamine (0.5 mL) and filtered through celite<sup>®</sup>. The filtrate was concentrated *in vacuo* and the residue purified by flash column chromatography (petrol $\rightarrow$ 5:1, petrol:ethyl acetate) to afford 5-(benzyloxycarbonylamino)pentyl-(2,3,4,6-tetra-*O*-benzyl-6-*S*-6-*C*-methyl- $\alpha$ -D-mannopyranosyl)-(1 $\rightarrow$ 2)-3,4,6-tri-*O*-benzyl- $\alpha$ -D-mannopyranosyl-(1 $\rightarrow$ 2)-3,4,6-tri-*O*-benzyl- $\alpha$ -D-mannopyranosyl-(1 $\rightarrow$ 3)-2,4-di-*O*-benzyl-6-*O*-*tert*-butyldimethylsilyl- $\alpha$ -D-mannopyranoside **5B** (43 mg, 49%) as a colourless oil;  $[\alpha]_D^{21} +16.0$  (*c*, 1.0 in CHCl<sub>3</sub>);  $\nu_{\max}$  (thin film) 1720 (s, C=O) cm<sup>-1</sup>;  $\delta_H$  (700 MHz, CDCl<sub>3</sub>) 0.03, 0.04 (6H, 2 x s, 2 x Me), 0.89 (9H, s, C(CH<sub>3</sub>)<sub>3</sub>), 1.15 (3H, d, *J* 6.5 Hz, 6-Me), 1.26-1.33 (2H, m, CH<sub>2</sub>-3), 1.43-1.50 (4H, m, CH<sub>2</sub>-2, CH<sub>2</sub>-4), 3.12-3.15 (2H, m, CH<sub>2</sub>-1), 3.27-3.29 (1H, m, CHH'-5), 3.49 (2H, at, *J* 9.9 Hz, H-5d, H-6c), 3.53-3.55 (1H, m, H-5<sup>a</sup>), 3.59-3.64 (2H, m, H-6'c, CHH'-5), 3.67-3.68 (2H, m, H-6b, H-6'b), 3.72-3.73 (2H, m, H-6<sup>a</sup>, H-6'a), 3.79-3.84 (5H, m, H-2d, H-4c, H-4b, H-5c, H-6d), 3.87 (1H, at, *J* 9.3 Hz, H-4<sup>a</sup>), 3.90-3.92 (2H, m, H-2<sup>a</sup>, H-3d), 3.94 (1H, dd, *J*<sub>2,3</sub> 2.2 Hz, *J*<sub>3,4</sub> 9.2 Hz, H-3b), 4.01-4.04 (2H, m, H-3c, H-5b), 4.10 (1H, dd, *J*<sub>2,3</sub> 2.6 Hz, *J*<sub>3,4</sub> 9.4 Hz, H-3a), 4.15 (1H, as, H-2c), 4.20 (1H, at, *J* 9.6 Hz, H-4d), 4.22 (1H, as, H-2b), 4.32 (1H, d, *J* 11.8 Hz, CH), 4.36-4.41 (4H, m, 4 x CH), 4.49-4.67 (16H, m, 16 x CH), 4.76 (2H, d, *J* 11.4 Hz, 2 x CH), 4.79 (1H, s, H-1a), 4.85 (2H, d, *J* 11.0 Hz, 2 x CH), 4.93 (1H, d, *J* 10.9 Hz, CH), 5.10 (2H, s, CH<sub>2</sub>-Z), 5.25 (2H, s, H-1b, H-1c), 5.41 (1H, s, H-1d), 7.13-7.38 (65H, m, 65 x Ar-H);  $\delta_C$  (175 MHz, CDCl<sub>3</sub>) -4.5 (q, Me), 15.4 (q, 6-Me), 23.3 (t, CH<sub>2</sub>-3), 25.6 (q, C(CH<sub>3</sub>)<sub>3</sub>), 28.8, 29.6 (2 x t, CH<sub>2</sub>-2, CH<sub>2</sub>-4), 40.9 (t,



CH<sub>2</sub>-1), 62.4 (t, C-6a), 66.4 (t, CH<sub>2</sub>-Z), 67.2 (t, CH<sub>2</sub>-1), 68.7 (t, C-6c), 69.3 (t, C-6b), 70.3 (t, CH<sub>2</sub>), 71.3 (d, C-5d), 71.5, 71.6, 71.7, 72.1 (t, CH<sub>2</sub>), 72.4 (d, C-5c), 72.5 (d, C-5b), 72.9 (d, C-5a), 72.9 (t, CH<sub>2</sub>), 73.0 (d, C-2c), 73.2 (t, CH<sub>2</sub>), 73.4 (d, C-2b), 74.0 (d, C-2d), 74.6 (d, C-4d), 74.7, 74.8 (t, CH<sub>2</sub>), 74.7 (d, C-4a), 74.8 (d, C-4b, C-4c), 75.0 (d, C-5d), 78.0 (d, C-2a), 79.4 (d, C-3c), 80.0 (d, C-3b), 80.2 (d, C-3d), 80.3 (d, C-3a), 96.6 (d, C-1a), 98.3 (d, C-1d), 100.0 (d, C-1b), 101.1 (d, C-1c); *m/z* (ESI<sup>+</sup>) 2118 (M+Na<sup>+</sup>, 100%); (M+Na<sup>+</sup>) peaks measured: 2116.9 (64%), 2117.9 (100%), 2118.9 (77%), 2119.9 (40%), 2120.9 (14%), 2121.9 (5%) calculated peaks: 2116.9 (69%), 2117.9 (100%), 2118.9 (78%), 2119.9 (42%), 2120.9 (17%), 2121.9 (6%).

**5-(Benzyloxycarbonylamino)pentyl-(2-*O*-acetyl-3,4,6-tri-*O*-benzyl- $\alpha$ -D-mannopyranosyl)-(1 $\rightarrow$ 2)-3,4,6-tri-*O*-benzyl- $\alpha$ -D-mannopyranosyl-(1 $\rightarrow$ 2)-3,4,6-tri-*O*-benzyl- $\alpha$ -D-mannopyranosyl-(1 $\rightarrow$ 3)-2,4-di-*O*-benzyl-6-*O*-tert-butyldimethylsilyl- $\alpha$ -D-mannopyranoside **25B****

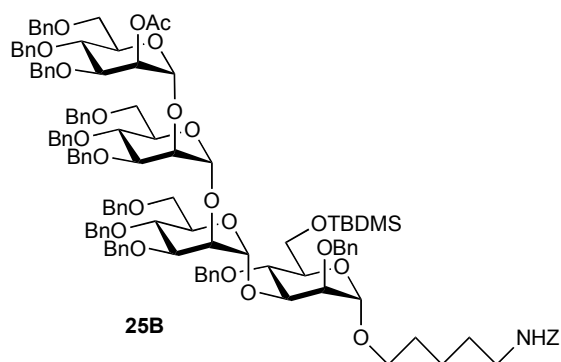

Same as above procedure. Yield 44%;  $[\alpha]_D^{21} +13.5$  (c, 1.0 in CHCl<sub>3</sub>);  $\nu_{\max}$  (thin film) 1751, 1720 (s, C=O) cm<sup>-1</sup>;  $\delta_H$  (700 MHz, CDCl<sub>3</sub>) 0.04, 0.05 (6H, 2 x s, 2 x Me), 0.90 (9H, s, C(CH<sub>3</sub>)<sub>3</sub>), 1.25-1.31 (2H, m, CH<sub>2</sub>-3), 1.42-1.49 (4H, m, CH<sub>2</sub>-2, CH<sub>2</sub>-4), 2.15 (3H, s, OAc), 3.10-3.14 (2H, m, CH<sub>2</sub>-1), 3.26-3.28 (1H, m, CHH'-5), 3.45 (1H, d, *J* 9.3 Hz, H-6d), 3.51 (1H, d, *J* 10.0 Hz, H-6c), 3.52-3.55 (1H, m, H-5a), 3.59-3.62 (1H, m, CHH'-5), 3.63 (1H, dd, *J*<sub>5,6</sub> 3.1 Hz, *J*<sub>6,6'</sub> 10.5 Hz, H-6'd), 3.66-3.69 (3H, m, H-6'c, H-6b, H-6'b), 3.72-3.74 (2H, m, H-6a, H-6'a), 3.78 (1H, at, *J* 9.7 Hz, H-4b), 3.80 (1H, m, H-4a), 3.88-3.90 (2H, m, H-5c, H-5d), 3.92-4.01 (6H, m, H-2a, H-3b, H-3c, H-4c, H-4d, H-5b), 4.03 (1H, dd, *J*<sub>2,3</sub> 3.2 Hz, *J*<sub>3,4</sub> 9.3 Hz, H-3d), 4.06 (1H, bs, H-2c), 4.10 (1H, dd, *J*<sub>2,3</sub> 3.0 Hz, *J*<sub>3,4</sub> 9.5 Hz, H-3a), 4.15 (1H, d, *J* 3.1 Hz, H-2b), 4.25 (1H, d, *J* 12.2 Hz, CH), 4.38-4.64 (18H,

m, 18 x CH), 4.69 (1H, d,  $J$  10.9 Hz, CH), 4.75 (1H, d,  $J$  11.4 Hz, CH), 4.78 (1H, s, H-1a), 4.84-4.88 (3H, m, 3 x CH), 5.10 (2H, s, CH<sub>2</sub>-Z), 5.12 (1H, d,  $J_{1,2}$  1.2 Hz, H-1d), 5.22 (1H, s, H-1b), 5.26 (1H, s, H-1c), 5.59 (1H, dd,  $J_{1,2}$  1.9 Hz,  $J_{2,3}$  2.9 Hz, H-2d), 7.10-7.38 (60H, m, 60 x Ar-H);  $\delta_c$  (175 MHz, CDCl<sub>3</sub>) -4.5 (q, Me), 23.3 (t, CH<sub>2</sub>-3), 21.1 (q, OAc), 25.7 (q, C(CH<sub>3</sub>)<sub>3</sub>), 28.9, 29.7 (2 x t, CH<sub>2</sub>-2, CH<sub>2</sub>-4), 40.4 (t, CH<sub>2</sub>-1), 62.6 (t, C-6a), 66.4 (t, CH<sub>2</sub>-Z), 67.1 (t, CH<sub>2</sub>-5), 68.4 (t, C-6d), 68.8 (t, C-6c), 69.4 (t, C-6b), 71.8, 71.9 (t, 2 x CH<sub>2</sub>), 72.0 (2 x d, C-5c, C-5d), 72.5 (d, C-5b), 72.9 (d, C-5a), 73.0, 73.2, 73.3 (t, CH<sub>2</sub>), 74.1 (d, C-4c), 74.4 (d, C-4d), 74.7 (d, C-2b), 74.7 (d, C-4a), 74.8, 74.9 (t, CH<sub>2</sub>), 75.0 (d, C-2c), 75.0 (d, C-4b), 78.1 (d, C-2a), 78.3 (d, C-3d), 79.3 (d, C-3c), 79.3 (d, C-3b), 80.1 (d, C-3a), 96.7 (d, C-1a), 99.1 (d, C-1d), 100.4 (d, C-1b), 101.2 (d, C-1c);  $m/z$  (ESI<sup>+</sup>) 2055 (M+Na<sup>+</sup>, 100%); (M+Na<sup>+</sup>) peaks measured: 2054.8 (71%), 2055.8 (100%), 2056.8 (72%), 2057.8 (37%), 2058.8 (14%), 2059.8 (5%) calculated peaks: 2054.9 (72%), 2055.9 (100%), 2056.9 (75%), 2057.9 (39%), 2058.9 (15%), 2059.9 (5%).

**5-Amino-pentyl- $\alpha$ -D-mannopyranosyl-(1 $\rightarrow$ 2)- $\alpha$ -D-mannopyranosyl-(1 $\rightarrow$ 2)- $\alpha$ -D-mannopyranosyl-(1 $\rightarrow$ 3)- $\alpha$ -D-mannopyranoside **3B'****

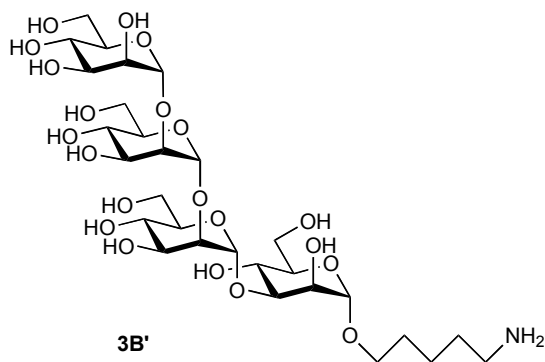

Sodium methoxide (1 mL of a 0.1 M solution in methanol) was added to a solution of 5-(benzyloxycarbonylamino)pentyl-(2-*O*-acetyl-3,4,6-tri-*O*-benzyl- $\alpha$ -D-mannopyranosyl)-(1 $\rightarrow$ 2)-3,4,6-tri-*O*-benzyl- $\alpha$ -D-mannopyranosyl-(1 $\rightarrow$ 2)-3,4,6-tri-*O*-benzyl- $\alpha$ -D-mannopyranosyl-(1 $\rightarrow$ 3)-2,4-di-*O*-benzyl-6-*O*-tert-butyltrimethylsilyl- $\alpha$ -D-mannopyranoside **25B** (50 mg, 0.025 mmol) in methanol (1 mL). After 18 h the reaction mixture was neutralized with acidified DOWEX, filtered and concentrated *in vacuo*. The residue was suspended in acetic acid (80% in water) and heated at 50°C. After 48 h, t.l.c (5:1, petrol:ethyl acetate) indicated formation of a product ( $R_f$  0.1)

with consumption of the starting material ( $R_f$  0.6). The reaction mixture was concentrated *in vacuo* and coevaporated with toluene (3 x 10 mL). The residue was purified by flash column chromatography (2:1, petrol:ethyl acetate). The desilylated product was dissolved in ethanol and palladium (10 mg of 10% palladium on carbon) was added. Hydrogen gas was bubbled through the solution until saturated. After 48 h under hydrogen, the reaction mixture was filtered through celite<sup>®</sup>, concentrated *in vacuo* and purified by reverse phase C-18 chromatography to afford 5-amino-pentyl- $\alpha$ -D-mannopyranosyl-(1 $\rightarrow$ 2)- $\alpha$ -D-mannopyranosyl-(1 $\rightarrow$ 2)- $\alpha$ -D-mannopyranosyl-(1 $\rightarrow$ 3)- $\alpha$ -D-mannopyranoside **3B'** (14 mg, 75% over 2 steps) as an amorphous white solid;  $\delta_H$  (500 MHz, D<sub>2</sub>O) 1.37 (2H, bs, CH<sub>2</sub>-3), 1.59 (4H, bs, CH<sub>2</sub>-2, CH<sub>2</sub>-4), 2.92 (2H, bs, CH<sub>2</sub>-1), 3.46-4.02 (26H, m, 24 x CH, CH<sub>2</sub>-5), 4.75, 4.96, 5.22, 5.27 (4H, 4 x s, 4 x H-1);  $\delta_C$  (125 MHz, D<sub>2</sub>O) 22.4 (t, CH<sub>2</sub>-3), 26.5, 28.0 (2 x t, CH<sub>2</sub>-2, CH<sub>2</sub>-4), 39.4 (t, CH<sub>2</sub>-1), 60.8, 61.0 (t, C-6a, C-6b, C-6c, C-6d), 66.1, 66.9, 67.4, 69.7, 69.9, 70.3, 72.9, 73.2, 73.3, 78.4, 78.5, 78.6 (d, C-2a, C-3a, C-4a, C-5a, C-2b, C-3b, C-4b, C-5b, C-2c, C-3c, C-4c, C-5c, C-2d, C-3d, C-4d, C-5d), 99.6, 100.6, 102.2 (d, C-1a, C-1b, C-1c, C-1d).

**5-Amino-pentyl-6-C-6-S-methyl- $\alpha$ -D-mannopyranosyl-(1 $\rightarrow$ 2)- $\alpha$ -D-mannopyranosyl-(1 $\rightarrow$ 2)- $\alpha$ -D-mannopyranosyl-(1 $\rightarrow$ 3)- $\alpha$ -D-mannopyranoside **5B'****

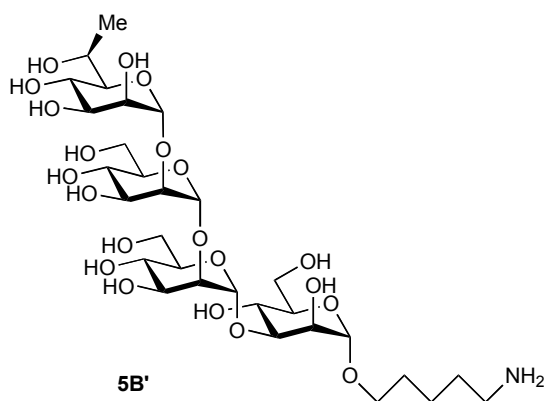

5-(Benzyloxycarbonylamino)pentyl-(2,3,4,6-tetra-*O*-benzyl-6-*S*-6-*C*-methyl- $\alpha$ -D-mannopyranosyl)-(1 $\rightarrow$ 2)-3,4,6-tri-*O*-benzyl- $\alpha$ -D-mannopyranosyl-(1 $\rightarrow$ 2)-3,4,6-tri-*O*-benzyl- $\alpha$ -D-mannopyranosyl-(1 $\rightarrow$ 3)-2,4-di-*O*-benzyl-6-*O*-tert-butyl-dimethylsilyl- $\alpha$ -D-mannopyranoside **24B** (43 mg, 0.021 mmol) was suspended in acetic acid (80% in water) and heated at 50°C. After 48 h, t.l.c (5:1, petrol:ethyl acetate) indicated formation of a

product ( $R_f$  0.1) with consumption of the starting material ( $R_f$  0.6). The reaction mixture was concentrated *in vacuo* and coevaporated with toluene (3 x 10 mL). The residue was purified by flash column chromatography (2:1, petrol:ethyl acetate). The desilylated product was dissolved in ethanol and palladium (10 mg of 10% palladium on carbon) was added. Hydrogen gas was bubbled through the solution until saturated. After 48 h under hydrogen, the reaction mixture was filtered through celite<sup>®</sup>, concentrated *in vacuo* and purified by reverse phase C-18 chromatography to afford 5-amino-pentyl-6-C-6-S-methyl- $\alpha$ -D-mannopyranosyl-(1 $\rightarrow$ 2)- $\alpha$ -D-mannopyranosyl-(1 $\rightarrow$ 2)- $\alpha$ -D-mannopyranosyl-(1 $\rightarrow$ 3)- $\alpha$ -D-mannopyranoside **5B'** (12 mg, 77% over 2 steps) as an amorphous white solid;  $\delta_H$  (500 MHz, D<sub>2</sub>O) 1.23 (3H, d,  $J$  6.6 Hz, 6-Me), 1.34-1.40 (2H, m, CH<sub>2</sub>-3), 1.54-1.57 (4H, m, CH<sub>2</sub>-2, CH<sub>2</sub>-4), 2.85 (1H, at,  $J$  7.5 Hz, CH<sub>2</sub>-1), 3.41-4.09 (25H, m, CH<sub>2</sub>-5, 23x CH), 4.75, 5.01, 5.15, 5.27 (4H, 4 x s, 4 x H-1);  $\delta_C$  (125 MHz, D<sub>2</sub>O) 19.0 (q, Me), 22.5 (t, CH<sub>2</sub>-3), 27.4, 28.1 (2 x t, CH<sub>2</sub>-2, CH<sub>2</sub>-4), 39.6 (t, CH<sub>2</sub>-1), 60.8, 61.0, 61.0 (t, C-6a, C-6b, C-6c), 66.9 (t, CH<sub>2</sub>-5), 66.0, 66.7, 67.0, 67.5, 69.7, 70.0, 70.1, 70.5, 72.9, 73.3, 73.4, 75.0, 77.9, 78.6, 78.8, 81.7 (d, C-2a, C-3a, C-4a, C-5a, C-2b, C-3b, C-4b, C-5b, C-2c, C-3c, C-4c, C-5c, C-2d, C-3d, C-4d, C-5d, C-6d), 99.5, 100.7, 100.8, 102.1 (d, C-1a, C-1b, C-1c, C-1d).

**5-Azido-pentyl- $\alpha$ -D-mannopyranosyl-(1 $\rightarrow$ 2)- $\alpha$ -D-mannopyranosyl-(1 $\rightarrow$ 2)- $\alpha$ -D-mannopyranosyl-(1 $\rightarrow$ 3)- $\alpha$ -D-mannopyranoside **3B****

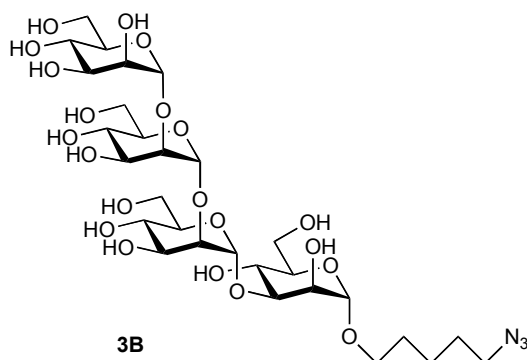

Sodium azide (12mg, 0.186mmol, 20eq) was dissolved in water (2ml) and DCM (2ml). The resulting biphasic mixture was cooled to 0°C and Tf<sub>2</sub>O (15.7 $\mu$ l, 0.093mmol, 10eq) was added to the organic layer via syringe. The mixture was stirred at 0°C for 3 hours, after which the aqueous layer was removed and the organic layer washed with water (2 x

1ml), saturated NaHCO<sub>3</sub> solution (2ml) and water (3 x 2ml). To this solution of TfN<sub>3</sub> was added NH<sub>4</sub>HCO<sub>3</sub> (1.5mg, 0.019mmol, 2eq), CuCl<sub>2</sub> (0.1mg, 9.3 x 10<sup>-4</sup> mmol, 0.1eq), **3B'** (7mg, 9.3 x 10<sup>-3</sup> mmol, 1eq), and water (1ml). Methanol (~6ml) was added to yield a monophasic solution. The reaction was monitored using TLC (5 ethanol : 3 NH<sub>4</sub>OH : 1 water) and HPLC using a Phenomenex Luna NH<sub>2</sub> column (4.6 x 300mm, 5μm) and 1 water : 1 acetonitrile as the mobile phase at flow rate of 1ml/min, with ELS detection of eluants. After 19 hours of reaction, starting material was still present so excess TfN<sub>3</sub> (20eq, solution in 1ml of DCM), prepared using the above protocol, was added to drive the reaction to completion. After a further 25 hours, complete consumption of starting material was detected. The organic solvents were removed *in vacuo* and the aqueous layer washed with ethyl acetate (2 x 15ml). The aqueous layer was lyophilized to remove NH<sub>4</sub>HCO<sub>3</sub>. The crude solid was dissolved in water (1ml) and Cu<sup>2+</sup> removed by cation exchange through a column of Dowex 50WX8 (H<sup>+</sup> form), eluted with water as the mobile phase. The product containing fractions were lyophilized and purified by HPLC using a Phenomenex Luna NH<sub>2</sub> column (4.6 x 300mm, 5μm) and 1 water : 3 acetonitrile as the mobile phase at flow rate of 1ml/min, with RI detection of eluants to yield the desired compound as a pale yellow amorphous solid **3B** (5.6mg, 77%).

R<sub>f</sub> 0.5 (5 ethanol : 3 NH<sub>4</sub>OH : 1 water); <sup>1</sup>H NMR (500MHz, D<sub>2</sub>O) δ ppm 1.37 (2H, m, H9), 1.51-1.61 (4H, m, H8, H10), 3.26 (2H, t, *J*<sub>H10-H11</sub> 6.8Hz, H11), 3.47 (1H, ddd, *J*<sub>H7-H7'</sub> 9.7Hz, *J*<sub>H7'-H8</sub> 6.1, *J*<sub>H7'-H8'</sub> 5.9Hz, H7'), 3.55 (1H, m, H5a), 3.58 (1H, t, *J*<sub>3a-4a</sub> 9.8Hz, *J*<sub>4a-5a</sub> 9.8Hz, H4a), 3.60 – 3.63 (2H, m, H5b, H5c), 3.63- 3.70 (9H, m, H4b, H4c, H4d, H5d, H6'a, H6'b, H6'c, H6'd, H7'), 3.76 (1H, dd, *J*<sub>H3a-H4a</sub> 9.6Hz, *J*<sub>H2a-H3a</sub> 3.6Hz, H3a), 3.78-3.82 (5H, m, H3d, H6a, H6b, H6c, H6d), 3.88 (1H, dd, *J*<sub>H3c-H4c</sub> 9.1Hz, *J*<sub>H2c-H3c</sub> 3.2Hz, H3c), 3.91 (1H, dd, *J*<sub>H3b-H4b</sub> 9.3Hz, *J*<sub>H2b-H3b</sub> 3.3Hz, H3b), 3.97 - 4.01 (3H, m, H2a, H2b, H2d), 4.03 (1H, dd, *J*<sub>H2c-H3c</sub> 3.3Hz, *J*<sub>H1c-H2c</sub> 1.6Hz, H2c), 4.75 (1H, d, *J*<sub>H1d-H2d</sub> 1.3Hz, H1d), 4.97 (1H, d, *J*<sub>H1a-H2a</sub> 1.3Hz, H1a), 5.22 (1H, d, *J*<sub>H1c-H2c</sub> 1.3Hz, H1c), 5.27 (1H, d, *J*<sub>H1b-H2b</sub> 1.3Hz, H1b); <sup>13</sup>C NMR (126MHz, D<sub>2</sub>O) δ ppm 22.7 (1C, C9), 27.7 (1C, C10), 28.0 (1C, C8), 51.0 (1C, C11), 60.8 (1C, C6d), 60.9 (1C, C6a), 60.9 (1C, C6c), 61.0 (1C, C6b), 66.1 (1C, C5d), 66.8 (1C, C5a), 66.8 (1C, C5c), 66.9 (1C, C5b), 67.6 (1C, C7), 69.7 (1C, C2d), 69.9 (1C, C2a), 70.0 (1C, C3b), 70.0 (1C, C3c), 70.3 (1C, C3a), 72.8 (1C, C4a), 73.2 (1C, C4d), 73.2 (1C, C4c), 73.3 (1C, C4b), 78.4 (1C, C2c), 78.5 (1C, C3d), 78.6 (1C, C2b), 99.6

(1C, C1d), 100.6 (1C, C1c), 100.7 (1C, C1b), 102.2 (1C, C1a); HRMS  $m/z$  ( $ES^+$ ) 800.2902  $[M + Na]^+$  (required 800.2907).

**5-Azido-pentyl-6-C-6-S-methyl- $\alpha$ -D-mannopyranosyl-(1 $\rightarrow$ 2)- $\alpha$ -D-mannopyranosyl-(1 $\rightarrow$ 2)- $\alpha$ -D-mannopyranosyl-(1 $\rightarrow$ 3)- $\alpha$ -D-mannopyranoside **5B****

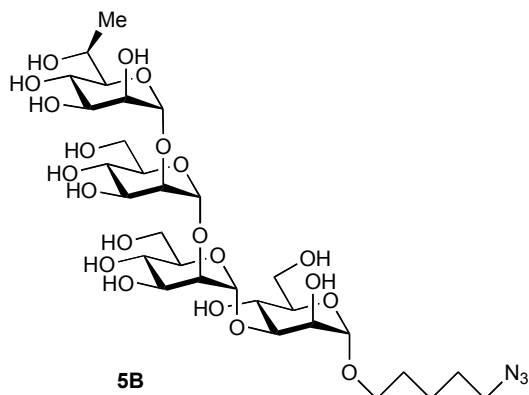

Sodium azide (102mg, 1.57mmol, 150eq) was dissolved in water (3ml) was DCM (3ml). The resulting biphasic mixture was cooled to 0°C and  $Tf_2O$  (132 $\mu$ l, 0.79mmol, 75eq) was added to the organic layer via syringe. The mixture was stirred at 0°C for 3 hours, after which the aqueous layer was removed and the organic layer washed with water (2 x 3ml), saturated  $NaHCO_3$  solution (3ml) and water (3 x 2ml). To this solution of  $TfN_3$  was added  $NH_4HCO_3$  (2.5mg, 0.031mmol, 3eq),  $CuCl_2$  (0.2mg,  $1.6 \times 10^{-3}$  mmol, 0.15eq), **5B'** (8mg, 0.01mmol, 1eq), and water (3ml). Methanol (~15ml) was added to yield a monophasic solution. The reaction was monitored using TLC (5 ethanol : 3  $NH_4OH$  : 1 water) and HPLC using a Phenomenex Luna  $NH_2$  column (4.6 x 300mm, 5 $\mu$ m) and 1 water : 1 acetonitrile as the mobile phase at flow rate of 1ml/min, with ELS detection of eluants. After 17 hours of reaction, complete consumption of starting material was detected. The organic solvents were removed *in vacuo* and the aqueous layer washed with ethyl acetate (2 x 15ml). The aqueous layer was lyophilized to remove  $NH_4HCO_3$ . The crude solid was dissolved in water (1ml) and  $Cu^{2+}$  removed by cation exchange through a column of Dowex 50WX8 ( $H^+$  form), eluted with water as the mobile phase. Lyophilization yielded the desired compound as a white amorphous solid **5B** (7.5mg, 91%).

$R_f$  0.6 (5 ethanol : 3  $\text{NH}_4\text{OH}$  : 1 water);  $^1\text{H}$  NMR (500MHz,  $\text{D}_2\text{O}$ )  $\delta$  ppm 1.22 (3H, d,  $J_{\text{H}_6\text{a}}$  6.6Hz,  $\text{CH}_3$ ), 1.36 (2H, m,  $^3J$  7.6Hz, H9), 1.54 (4H, quin,  $^3J$  7.3Hz, H8, H10), 3.25 (2H, t,  $J_{\text{H}_{10}\text{-H}_{11}}$  6.8Hz, H11), 3.40 (1H, d,  $J_{\text{H}_{5\text{a}}\text{-H}_{4\text{a}}}$  9.5Hz, H5a), 3.45 (1H, dt,  $^2J$  9.8Hz,  $J_{\text{H}_{7'}\text{-H}_{8'}}$  9.8Hz,  $J_{\text{H}_{7'}\text{-H}_{8'}}$  6.0Hz, H7'), 3.53-3.59 (3H, m, H4b, H5b, H5c), 3.60-3.67 (7H, m, H4c, H4d, H5d, H6'b, H6'c, H6'd, H7), 3.71 (1H, t,  $J_{\text{H}_{3\text{a}}\text{-H}_{4\text{a}}}$  9.1Hz,  $J_{\text{H}_{4\text{a}}\text{-H}_{5\text{a}}}$  9.1Hz, H4a), 3.75 (1H, dd,  $J_{\text{H}_{3\text{a}}\text{-H}_{4\text{a}}}$  8.7Hz,  $J_{\text{H}_{2\text{a}}\text{-H}_{3\text{a}}}$  3.3Hz, H3a), 3.77-3.81 (4H, m, H3d, H6b, H6c, H6d), 3.86 (1H, dd,  $J_{\text{H}_{3\text{b}}\text{-H}_{4\text{b}}}$  9.3Hz,  $J_{\text{H}_{2\text{b}}\text{-H}_{3\text{b}}}$  3.2Hz, H3b), 3.87 (1H, dd,  $J_{\text{H}_{3\text{c}}\text{-H}_{4\text{c}}}$  9.3Hz,  $J_{\text{H}_{2\text{c}}\text{-H}_{3\text{c}}}$  3.2Hz, H3c), 3.95 (1H, t,  $J_{\text{H}_{1\text{a}}\text{-H}_{2\text{a}}}$  1.9Hz,  $J_{\text{H}_{2\text{a}}\text{-H}_{3\text{a}}}$  1.9Hz, H2a), 3.97 (1H, t,  $J_{\text{H}_{1\text{b}}\text{-H}_{2\text{b}}}$  1.6Hz,  $J_{\text{H}_{2\text{b}}\text{-H}_{3\text{b}}}$  1.6Hz, H2b, H2d), 4.04 (1H, t,  $J_{\text{H}_{1\text{c}}\text{-H}_{2\text{c}}}$  2.5Hz,  $J_{\text{H}_{2\text{c}}\text{-H}_{3\text{c}}}$  2.5Hz, H2c), 4.08 (1H, qd,  $J_{\text{H}_{6\text{a}}\text{-CH}_3}$  6.9Hz,  $J_{\text{H}_{5\text{a}}\text{-H}_{6\text{a}}}$  1.0Hz, H6a), 4.74 (1H, as, H1d), 5.00 (1H, as, H1a), 5.14 (1H, as, H1c), 5.26 (1H, as, H1b);  $^{13}\text{C}$  NMR (126MHz,  $\text{D}_2\text{O}$ )  $\delta$  ppm 18.8 (1C,  $\text{CH}_3$ ), 22.7 (1C, C9), 27.7 (1C, C10), 28.0 (1C, C8), 51.0 (1C, C11), 60.8 (1C, C6d), 60.9 (1C, C6c), 61.0 (1C, C6b), 64.7 (1C, C6a), 66.0 (1C, C5d), 66.7 (1C, C4a), 66.9 (1C, C5c), 66.9 (1C, C5b), 67.6 (1C, C7), 69.7 (1C, C2d), 69.9 (1C, C2a), 70.0 (1C, C3c), 70.1 (1C, C3b), 70.5 (1C, C3a), 72.8 (1C, C4b), 73.3 (1C, C4c), 73.3 (1C, C4d), 75.0 (1C, C5a), 77.9 (1C, C2c), 78.6 (1C, C2b), 78.8 (1C, C3d), 99.5 (1C, C1d), 100.7 (1C, C1c), 100.8 (1C, C1b), 102.1 (1C, C1a); HRMS 790.3097 [ $\text{M} - \text{H}$ ] $^-$  (required 790.3099).

## 2. Modelling data

### Modelling experimental

Molecular modelling of the interaction between the synthesised sugars and 2G12 was carried out by Dr. Mark R. Wormald at the Oxford Glycobiology Institute, Department of Biochemistry, University of Oxford. This was performed on a Silicon Graphics Fuel workstation using InsightII and Discover software (Accelrys Inc., San Diego, USA).

The structures of the synthetic monosaccharides and disaccharides were built in Insight and energy minimised. For the disaccharides, the glycosidic linkage conformations were determined using the database of glycosidic linkage conformations. (21)

A single Fab domain of 2G12 was created from the coordinates of the 1.75 Å structure of the complex of 2G12 with  $\text{Man}\alpha 1\text{-}2\text{Man}(22)$  obtained from the Protein DataBase.(23)

(PDB code 1OP3). The synthetic monosaccharides (Fig. 1) and disaccharides (Fig. 2) were docked into the Fab antigen binding site by overlaying the terminal residue with the terminal Man residue of the Man $\alpha$ 1-2Man ligand. The modeled disaccharide complexes were then energy minimized, keeping the peptide backbone and the carbon atoms of the terminal saccharide residue fixed, and the resulting disaccharide conformation compared to the modeled free disaccharide.

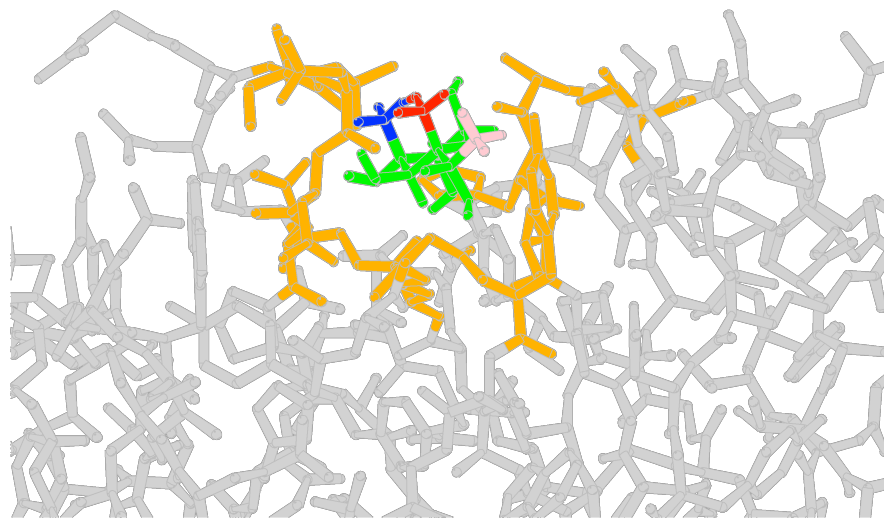

Figure S1: Mannose monosaccharide modeled in Fab 2G12 binding site. Substitutions at C-3 (blue), C-5 (red) and C-6 (pink) added to determine tolerance in binding site.

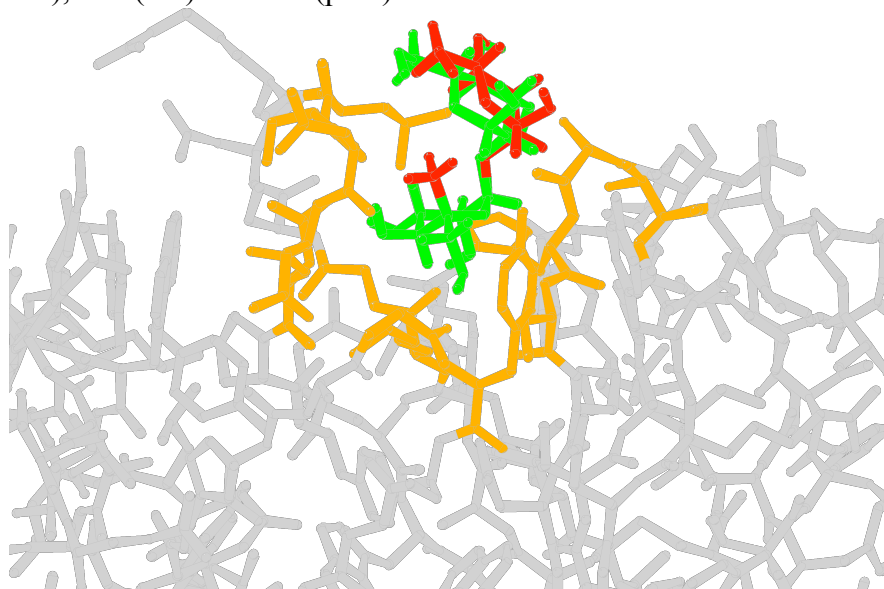

Figure S2: Terminal disaccharide of the D1 arm modeled in the Fab 2G12 binding site. Natural substrate (green) and C-5 modified disaccharide (red).



### 3. Competition ELISA

#### Procedure:

Plates (microtiter plate, flat bottom, Costar type 3690; Corning) were coated with 250 ng per well gp120<sub>JR-CSF</sub> overnight at 4°C. All subsequent steps were performed at room temperature. The plates were washed four times with PBS/0.05% (vol/vol) Tween 20 (Sigma), blocked for 1 h with 3% (mass/vol) BSA and then emptied but not washed. 2G12 (diluted to 0.5 µg/mL with 1% BSA/0.02% Tween20/PBS (PBS-BT) was added in the presence of serially diluted carbohydrate inhibitors and incubated for 2h. Unbound Ab was removed by washing four times as described above. Bound 2G12 was detected with 50 µL of an peroxidase-conjugated goat anti-human IgG F(ab')<sub>2</sub> HRP (Pierce) diluted 1:1,000 in PBS-BT. After 1 h, the wells were washed four times, and bound Ab was visualized with TMB substrate (Sigma, 50 µL of a 1mg/mL solution), quenched with 2M sulphuric acid and monitored at 450 nm.

#### Monosaccharide IC<sub>50</sub> values:

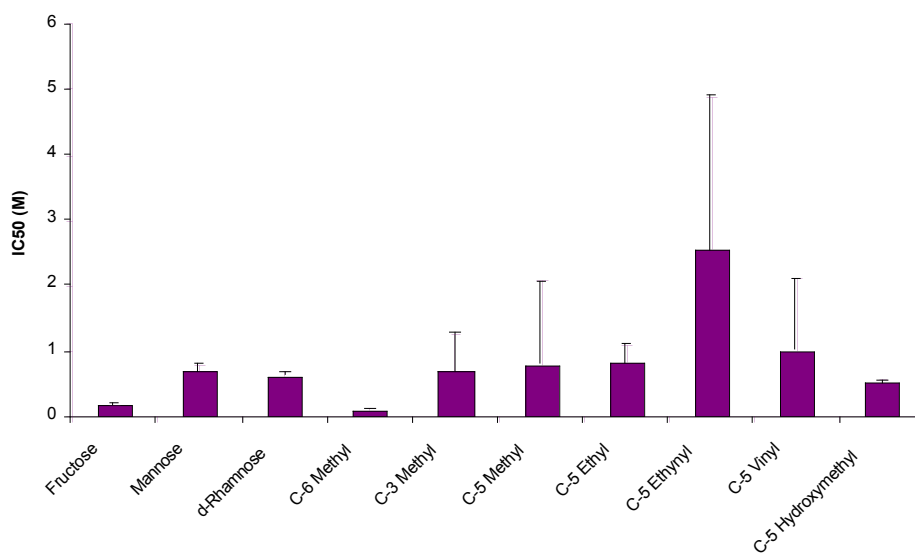

Figure S3: Monosaccharide inhibition.

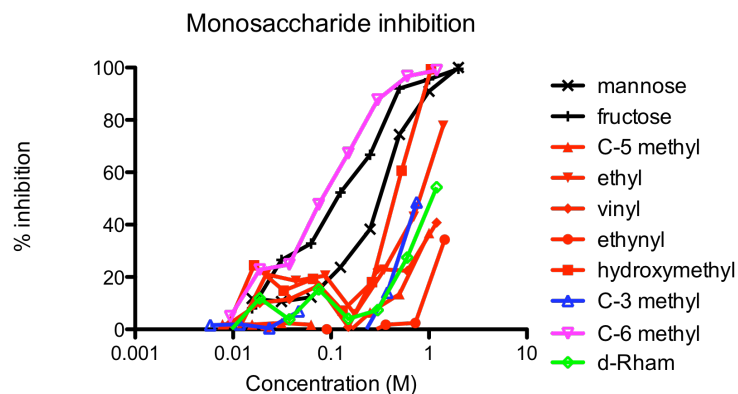

Figure S4: Monosaccharide inhibition curves.

**Tetrasaccharide IC<sub>50</sub> values:**

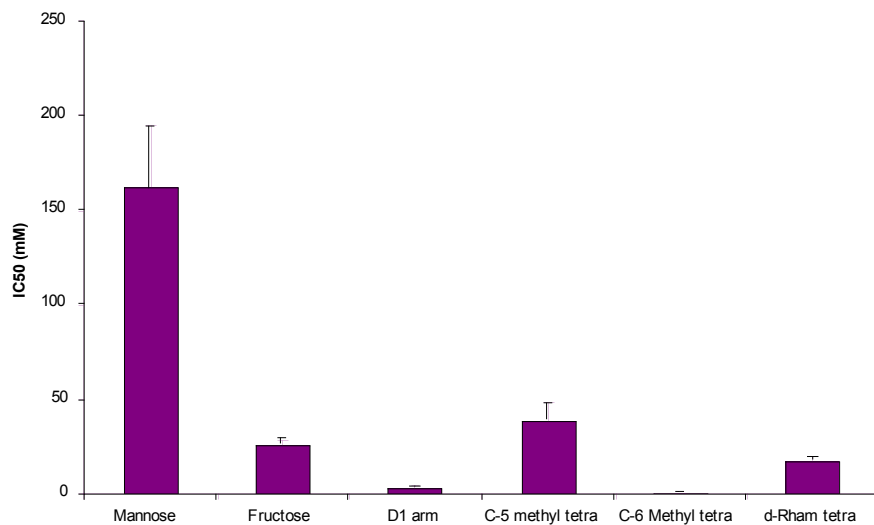

Figure S5: Tetrasaccharide Inhibitions.

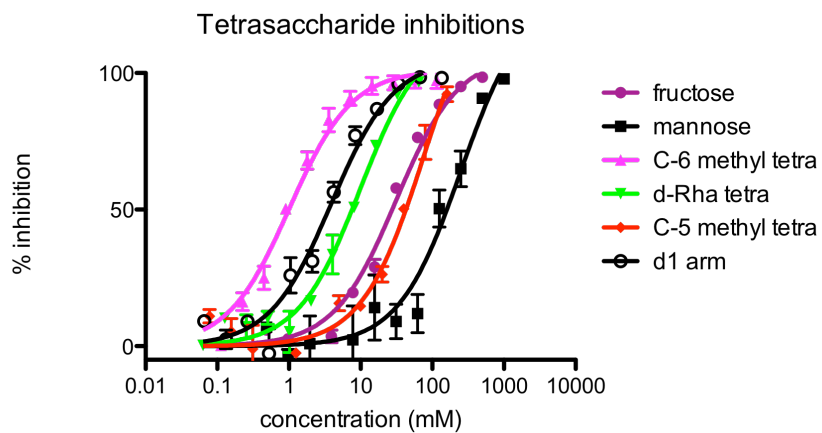

Figure 6: Tetrasaccharide inhibition curves

#### 4. Protein conjugation:

##### Conjugation to Q $\beta$ particles

**Q $\beta$ -alkyne:** Q $\beta$  bearing alkyne at surface-exposed lysine residues was prepared by incubating a 10 mg/mL solution of Q $\beta$  with 25 mM of N-(4-Pentynoyloxy) succinimide (35- fold excess with respect to protein subunit) in 0.1 M potassium phosphate buffer (pH 7) with 10% DMSO for 12 hours. The derivatized virus was separated from excess reagent by ultracentrifugation using a 10-40% sucrose gradient.

**Carbohydrate conjugation by click chemistry:** Tetrasaccharide azides **3c** and **5c** (0.5 mM) was added to Q $\beta$ -alkyne (1 mg/ml) in 0.1 M potassium phosphate buffer pH 7. The following reagents were added sequentially: aminoguanidine (AG, 5 mM), mixture of CuSO<sub>4</sub>:THPTA [tris(3-hydroxypropyltriazolylmethyl)amine] in a molar ratio of 1:5 (0.25 mM CuSO<sub>4</sub>, 1.25 mM THPTA), and sodium ascorbate (5 mM). The reaction mixture was incubated at room temperature for 1 hrs. Samples Q $\beta$ -3 and Q $\beta$ -5 were analyzed and purified by size-exclusion chromatography (SEC) using a Superose6 column.

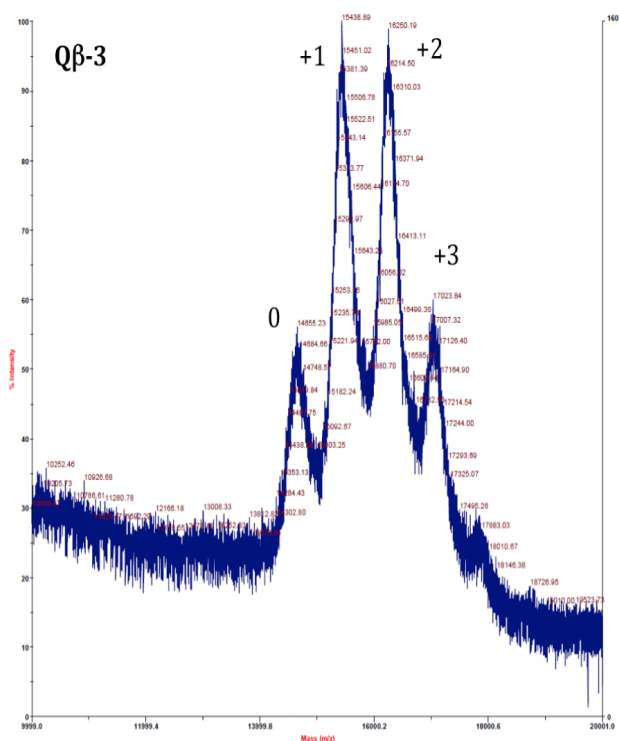

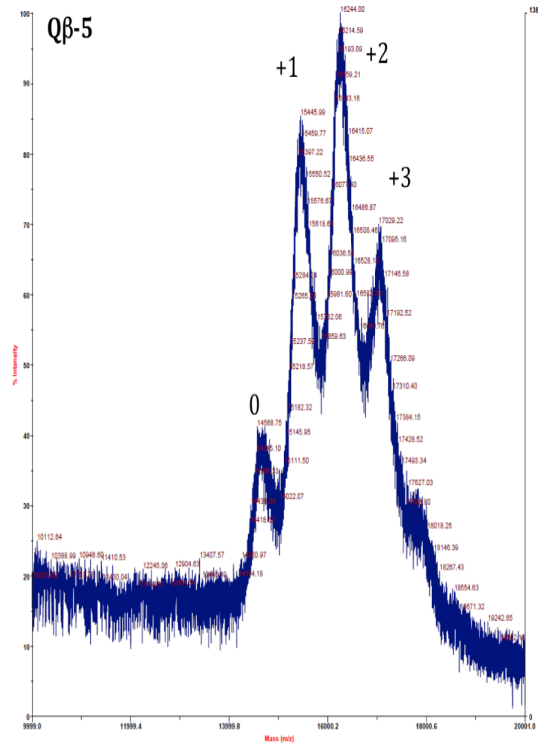

washed four times with PBS/0.05% (vol/vol) Tween 20 (Sigma), blocked for 1 h with 100  $\mu$ L 5% non-fat milk/PBS/0.05% Tween 20. Serial dilutions of 2G12 in 5% non-fat milk/PBS/0.05% Tween 20 were incubated for 2 h. Unbound Ab was removed by washing four times as described above. Binding was detected with Goat anti-human-Fc $\gamma$  AP conjugate (1:1000, Jackson ImmunoResearch, West Grove, PA) and *p*-nitrophenol phosphate substrate (Sigma) at 405 nm.

### **Immunisation protocol**

New Zealand white rabbits were immunized at 4 week intervals with 50  $\mu$ g of conjugate (based on protein content) with the adjuvant Alum in PBS (total of 4 immunisations and 4 rabbits per group). Blood was drawn 8 days after each immunisation. Rabbits 8143-8146 were immunised with Q $\beta$ -3 and rabbits 8151-8154 were immunised with Q $\beta$ -5.

### **Serum ELISA**

Wells were coated with 250 ng of gp120 JR-FL (Progenics, Tarrytown, NY) or 250 ng of glycoconjugate overnight at 4 °C. Plates were washed four times with PBS/0.05% (vol/vol) Tween 20 (Sigma), blocked for 1 h with 100  $\mu$ L 5% non-fat milk/PBS/0.05% Tween 20. Serial dilutions of rabbit serum in 5% non-fat milk/PBS/0.05% Tween 20 were incubated for 2 h. Unbound Ab was removed by washing four times as described above. Binding was detected with Goat anti-rabbit-Fc $\gamma$  AP conjugate (1:1000, Jackson ImmunoResearch, West Grove, PA) and *p*-nitrophenol phosphate substrate (Sigma) at 405 nm. The serum binding titres were calculated as the serum dilution that gave 50% of the maximum binding.

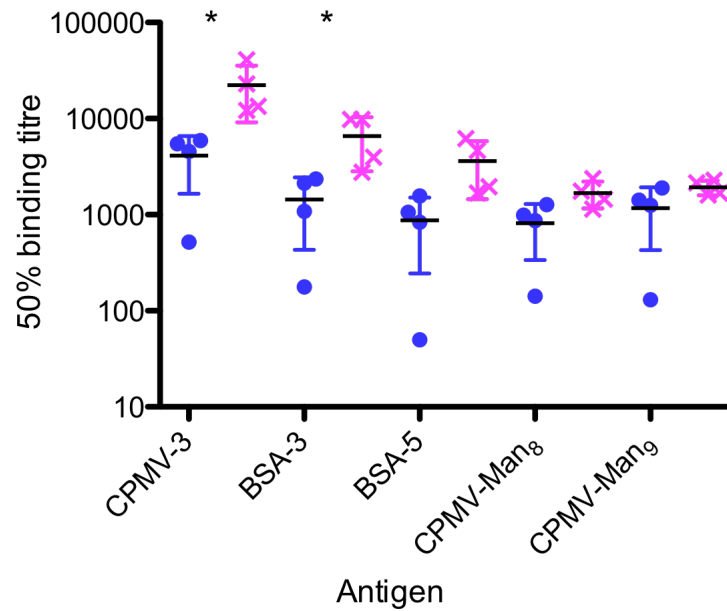

Figure S8a: 50% Maximum binding titre of serum against oligomannose glycoconjugates elicited by immunization with Q $\beta$ -3 and Q $\beta$ -5 (measured by ELISA). Blue circles = Q $\beta$ -3 and pink crosses = Q $\beta$ -5. Each group consists of 4 rabbits. \* =  $p < 0.05$  in t-test.

### gp120 Binding ELISA

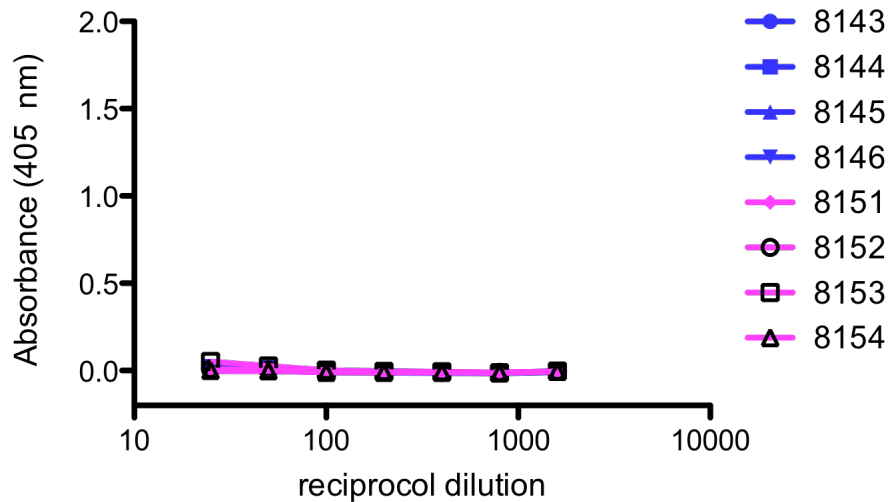

Figure S8: Binding to gp120<sub>JR-FL</sub> by rabbit serum from immunisation with glycoconjugates Q $\beta$ -3 (blue) and Q $\beta$ -5 (pink).

### Neutralisation Assays

HIV-1 enveloped pseudovirus capable of single round infection was generated by cotransfection of HEK 293T cells with HIV Env expressing plasmid and pSG3 $\Delta$ Env as

previously described (24). Virus was harvested after 72 h. Serial dilutions of Ab were incubated with virus for 1h at 37 °C before being added to TZM-bl cells. After 3 days the TZM-bl cells were lysed and luciferase assay run. Neutralisation activity was measured by reduction in RLU compared to virus only controls.

### HIV-1 pseudovirus neutralisation assay:

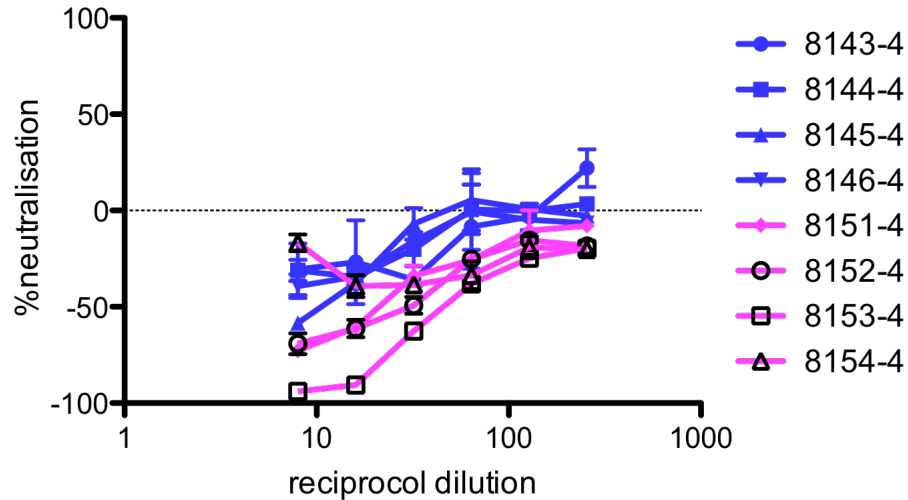

Figure S9: HIV-1 Neutralisation activity of serum from rabbits immunised with Q $\beta$ -3 (blue) and Q $\beta$ -5 (pink).

### Time Course of IgG production:

Titres of antibodies against CPMV-3 were measured by ELISA after each immunisation. Both immunogens have a similar trend in antibody production over the immunisation schedule. However, the non-self immunogen Q $\beta$ -5 does produce overall higher titres of Man<sub>4</sub> specific antibodies.

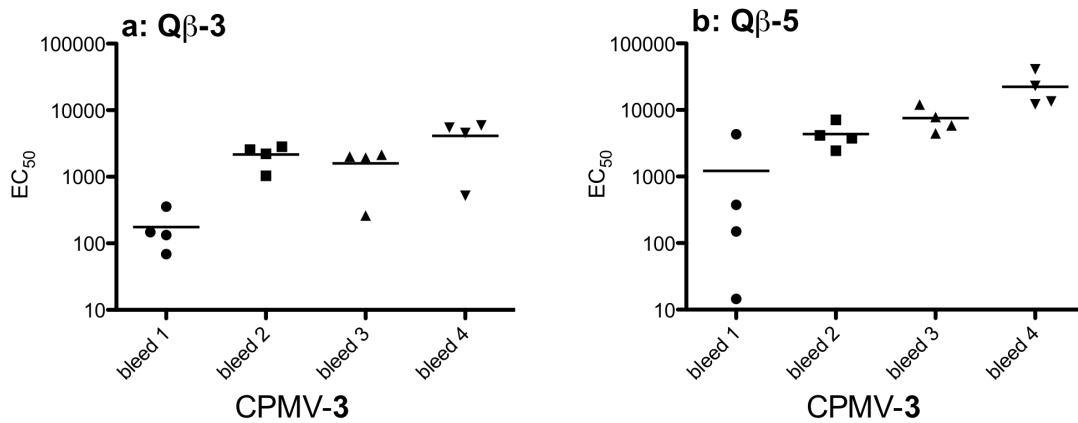

Figure S10: Time course of antibody production against CPMV-3.

### Linker reactivity:

The CPMV-Man<sub>1</sub> glycoconjugate was used to estimate the antibody titres against the linker joining the carbohydrate to the virus scaffold. The antibody titres against both CPMV-3 and CPMV-Man<sub>1</sub> were measured by ELISA. Serum was also depleted of linker reactivity by incubating the serum overnight with CPMV-Man<sub>1</sub> glycoconjugates. Antibody titres against both CPMV-3 and CPMV-Man<sub>1</sub> were then re-assessed by ELISA. The difference in antibody titres against CPMV-3 for the depleted and undepleted serum were very similar suggesting the CPMV-3 specific antibodies are not directed against the linker component.



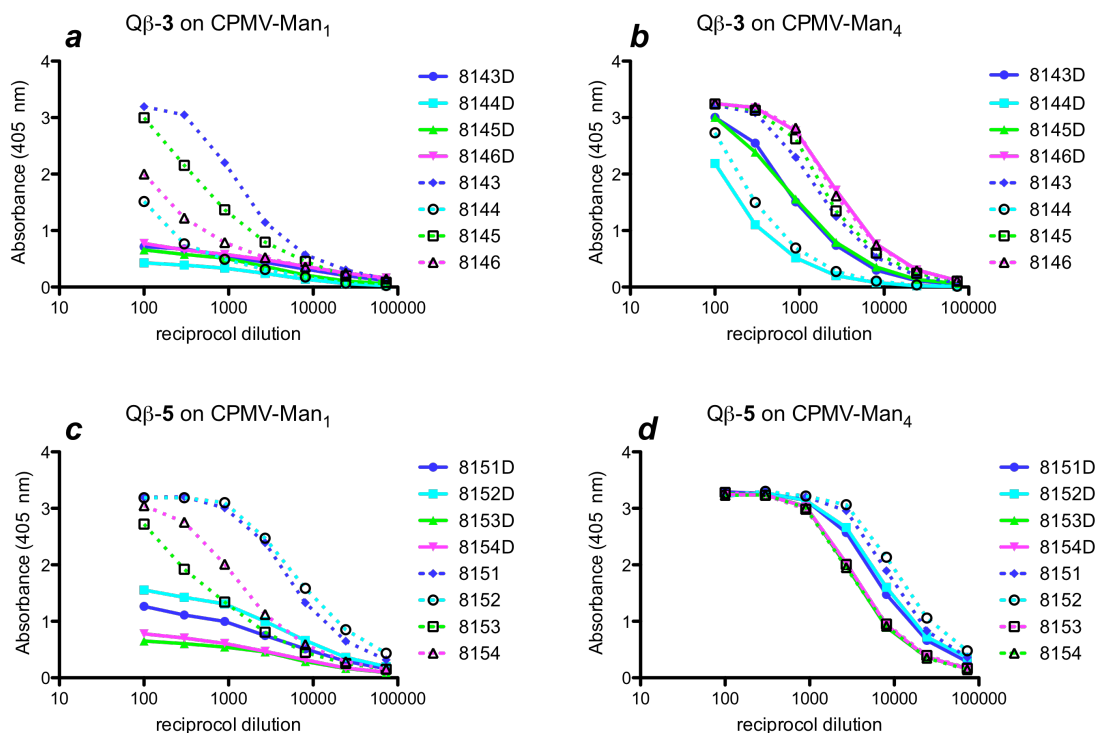

Figure S11: Antibody titres against CPMV-3 and CPMV-Man<sub>1</sub> with and without depletion with CPMV-Man<sub>1</sub>. a) Qβ-3 serum on CPMV-Man<sub>1</sub>; b) Qβ-3 serum on CPMV-3; c) Qβ-5 serum on CPMV-Man<sub>1</sub> and d) Qβ-5 serum on CPMV-3. D= serum depleted with CPMV-Man<sub>1</sub>.

## 6. Crystal structure determinations and analyses:

Fab 2G12 fragments were prepared as previously described (22) and concentrated to 20 mg/ml. For each complex, the solid sugar ligand was added to the Fab solution to saturation. For crystallization, equal volumes of protein/sugar and reservoir solution (0.3 μL) were mixed in sitting-drop vapor-diffusion experiments. Fab 2G12/D-fructose crystals were grown with a reservoir solution of 2.5 M sodium malonate (pH 5.5) whereas C-6 methyl monosaccharide **10** cocrystals were grown with 30% polyethylene glycol (PEG) 3350 and 0.5 M ammonium iodide (pH 8.5); and, C-6''' methyl tetrasaccharide **5** cocrystals were grown with 15% PEG 4000 and 0.5 M ammonium formate (pH 7.5). The monosaccharide **10** and tetrasaccharide **5** cocrystals were cryoprotected with 5% and 25% glycerol, respectively, and the D-fructose co-crystals were cryoprotected with 3.4 M sodium malonate. Data were collected at 100 K, at the Advanced Light Source beamlines 5.0.3 and 8.2.1, and Advanced Photon Source

beamline 23IDB ( $\lambda \sim 1.0 \text{ \AA}$ ), and indexed, integrated, and scaled using HKL2000 (25). Data collection and refinement results are summarized in Table S1.

The structures were solved by molecular replacement using the 1.75  $\text{\AA}$  structure of Fab 2G12 ((22) Protein Data Bank ID code 1OP3) as the starting model for Phaser (26). The asymmetric unit of all the cocrystals consisted of two Fab plus sugar complexes. Model building was performed with COOT (27) and refined with Refmac5 using TLS refinement (26, 28) and with Buster (29). The same  $R_{\text{free}}$  test-set (5%) was maintained throughout the refinement of all the structures. Total B-factors were calculated using TLSANL (26, 30).  $F_o - F_c$  simulated annealing omit maps were calculated using CNS (Version 1.1) (31). Molecular topologies for Refmac5, Buster and CNS were generated using PRODRG (32). Potential H bonds were evaluated using the program HBPLUS (33), with some modifications. Buried molecular surface areas and van der Waals contacts were measured using the programs MS (34) and CONTACTSYM (35), respectively, with some modifications (36).

**Table S1: Data collection and refinement statistics**

|                                                       | 2G12/D-fructose                               | 2G12/C-6 methyl<br>monosaccharide <b>10</b> | 2G12/C-6 methyl<br>tetrasaccharide <b>5</b>   |
|-------------------------------------------------------|-----------------------------------------------|---------------------------------------------|-----------------------------------------------|
| <b>Data collection</b>                                |                                               |                                             |                                               |
| Space group                                           | P2 <sub>1</sub> 2 <sub>1</sub> 2 <sub>1</sub> | P2 <sub>1</sub>                             | P2 <sub>1</sub> 2 <sub>1</sub> 2 <sub>1</sub> |
| Cell dimensions<br><i>a, b, c</i> (Å)                 | 77.91, 93.26, 169.60                          | 72.62, 72.09, 84.07                         | 44.74, 131.16,<br>169.53                      |
| $\alpha, \beta, \gamma$ (°)                           | 90, 90, 90                                    | 90, 95.8, 90                                | 90, 90, 90                                    |
| Resolution (Å)                                        | 50-1.95 (2.02-1.95)*                          | 50-1.75 (1.81-1.75)                         | 50-2.85 (2.95-2.85)                           |
| $R_{\text{sym}}$                                      | 6.7 (30.0)                                    | 8.1 (39.3)                                  | 10.3 (44.8)                                   |
| $I / \sigma I$                                        | 15.1 (3.0)                                    | 11.3 (2.5)                                  | 11.5 (2.4)                                    |
| Completeness (%)                                      | 89.5 (67.5)                                   | 98.4 (97.5)                                 | 88.4 (61.8)                                   |
| Redundancy                                            | 3.2 (2.6)                                     | 3.2 (2.6)                                   | 5.1 (5.0)                                     |
| <b>Refinement</b>                                     |                                               |                                             |                                               |
| Resolution (Å)                                        | 30-1.95                                       | 30-1.75                                     | 30-2.85                                       |
| No. reflections (test) <sup>#</sup>                   | 77,022(4103)                                  | 81,209(4297)                                | 21,374(1045)                                  |
| $R_{\text{cryst}} / R_{\text{free}}$                  | 18.2/22.3                                     | 17.6/21.8                                   | 23.2/28.0                                     |
| No. atoms                                             |                                               |                                             |                                               |
| Protein                                               | 6655                                          | 6776                                        | 6535                                          |
| Ligand                                                | 24                                            | 28                                          | 92                                            |
| Water                                                 | 565                                           | 1003                                        | 8                                             |
| <i>B</i> -values                                      |                                               |                                             |                                               |
| Protein                                               | 47.7                                          | 23.3                                        | 79.2                                          |
| Ligand                                                | 35.0                                          | 22.5                                        | 72.8                                          |
| Water                                                 | 47.5                                          | 24.4                                        | 53.6                                          |
| R.m.s. deviations                                     |                                               |                                             |                                               |
| Bond lengths (Å)                                      | 0.015                                         | 0.013                                       | 0.009                                         |
| Bond angles (°)                                       | 1.58                                          | 1.51                                        | 1.19                                          |
| Ramachandran statistics <sup>~</sup><br>(%)           |                                               |                                             |                                               |
| Most favoured regions                                 | 88.8                                          | 90.4                                        | 87.9                                          |
| Additional allowed<br>regions                         | 10.6                                          | 9.0                                         | 11.0                                          |
| Generously allowed<br>Disallowed regions <sup>^</sup> | 0.3                                           | 0.3                                         | 0.8                                           |
| Disallowed regions <sup>^</sup>                       | 0.3                                           | 0.3                                         | 0.3                                           |
| Other                                                 |                                               |                                             |                                               |

Data were collected from a single crystal for each structure.

\*Values in parentheses are for the highest-resolution shell.

<sup>#</sup>Test set of reflections for calculation of  $R_{\text{free}}$ .

<sup>~</sup>Calculated using PROCHECK (29). <sup>^</sup>Residue L51 of both Fab molecules in the asymmetric unit is in a well-defined  $\gamma$  turn in almost all other antibody structures, but is incorrectly flagged by PROCHECK as an outlier.

**6. References:**

1. Gelas J & Horton D (1978) *Carbohydr Res* **67**, 371-387.
2. Buchwald SL, Nielsen RB, & Dewan JC (1989) *Organometallics* **8**, 1593-1598.
3. Clark Still W (1978) *Journal of the American Chemical Society* **100**, 1481-1487.
4. Bols M, Grubbe H, Jespersen TM, & Szarek WA (1994) *Carbohydr Res* **253**, 195-206.
5. Jain RK & Matta KL (1996) *Carbohydr Res* **282**, 101-111.
6. Shaban MAE, Ary IE, Jeanloz DA, & Jeanloz RW (1975) *Carbohydr Res* **45**, 105-114.
7. Liptak A, Fugedi P, & Nanasi P (1976) *Carbohydr Res* **51**, C19-C21.
8. Liptak A, Jodal I, & Nanasi P (1975) *Carbohydr Res* **44**, 1-11.
9. Bashyal BP, Fleet GWJ, Gough MJ, & Smith PW (1987) *Tetrahedron* **43**, 3083-3093.
10. Xue J, Shao N, & Guo Z (2003) *J Org Chem* **68**, 4020-4029.
11. Weygand Z (1962) *Justus Liebigs Annalen der Chemie* **657**, 179.
12. Ammann H & Dupuis G (1988) *Can J Chem* **66**, 1651-1655.
13. Ogawa T & Sasajima K (1981) *Carbohydr Res* **93**, 53-66.
14. Paulsen H & Helpap B (1991) *Carbohydr Res* **216**, 289-313.
15. Hallgren C & Hindsgaul O (1994) *Carbohydr Res* **260**, 63-71.
16. Ottosson H (1990) *Carbohydr Res* **197**, 101-107.
17. Szurmai Z, Balatoni L, & Liptak A (1994) *Carbohydr Res* **254**, 301-309.
18. Lam SN & Gervay-Hague J (2005) *J Org Chem* **70**, 8772-8779.
19. Ogawa T & Matsui M (1978) *Carbohydr Res* **62**, C1-C4.
20. Ogawa T & Sasajima K (1981) *Tetrahedron* **37**, 2787-2792.
21. Wormald MR, Petrescu AJ, Pao YL, Glithero A, Elliott T, & Dwek RA (2002) *Chem Rev* **102**, 371-386.
22. Calarese DA, Scanlan CN, Zwick MB, Deechongkit S, Mimura Y, Kunert R, Zhu P, Wormald MR, Stanfield RL, Roux KH, *et al.* (2003) *Science* **300**, 2065-2071.
23. Berman HM, Westbrook J, Feng Z, Gilliland G, Bhat TN, Weissig H, Shindyalov IN, & Bourne PE (2000) *Nucleic Acids Res* **28**, 235-242.
24. Li M, Gao F, Mascola JR, Stamatatos L, Polonis VR, Koutsoukos M, Voss G, Goepfert P, Gilbert P, Greene KM, *et al.* (2005) *J Virol* **79**, 10108-10125.
25. Otwinowski Z, Minor W. (1997) in *Methods in Enzymology*, ed. Carter CWS, R. M. (Academic Press, New York), pp. 307-326.
26. Collaborative Computational Project (1994) *Acta Crystallogr D Biol Crystallogr* **50**, 760-763.
27. Emsley P & Cowtan K (2004) *Acta Crystallogr D Biol Crystallogr* **60**, 2126-2132.
28. Murshudov GN, Vagin AA, & Dodson EJ (1997) *Acta Crystallogr D Biol Crystallogr* **53**, 240-255.
29. Bricogne G, *et al.*, (2009) *BUSTER, version 2.8.0* (Global Phasing Ltd., Cambridge, United Kingdom).
30. Howlin B, Butler, S.A., Moss, D.S., Harris, G.W. & Driessen, H.P.C. (1993) *J. Appl. Cryst.* **26**, 622-624.

31. Brunger AT, Adams PD, Clore GM, DeLano WL, Gros P, Grosse-Kunstleve RW, Jiang JS, Kuszewski J, Nilges M, Pannu NS, *et al.* (1998) *Acta Crystallogr D Biol Crystallogr* **54**, 905-921.
32. Schuttelkopf AW & van Aalten DM (2004) *Acta Crystallogr D Biol Crystallogr* **60**, 1355-1363.
33. McDonald IK & Thornton JM (1994) *J Mol Biol* **238**, 777-793.
34. Connolly ML (1993) *J Mol Graph* **11**, 139-141.
35. Sheriff S, Hendrickson WA, & Smith JL (1987) *J Mol Biol* **197**, 273-296.
36. Cornell WD, Cieplak, P., Bayly, C.I., Gould, I.R., Merz, K.M., Ferguson, D.M., Spellmeyer, D.C., Fox, T., Caldwell, J.W., & Kollman, P.A. (1995) *J Am Chem Soc.* **117**, 5179-5197.



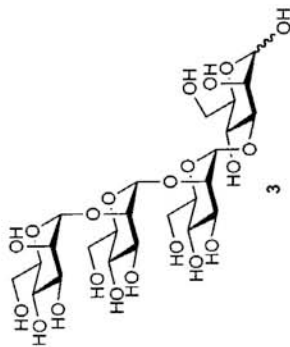

a man tetra methyl unprotective linker case

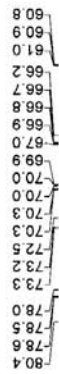

Frequency (MHz) 125.80  
 Nucleus 13C  
 Number of Transients 3072  
 Origin avc500  
 Pulse Sequence zgpg30  
 Receiver Gain 1820.00  
 SW(cyclical) (Hz) 31250.00  
 Solvent DEUTERIUM  
 Spectrum Offset (Hz) 12580.10  
 Sweep Width (Hz) 31249.05  
 Temperature (degree C) 24.970

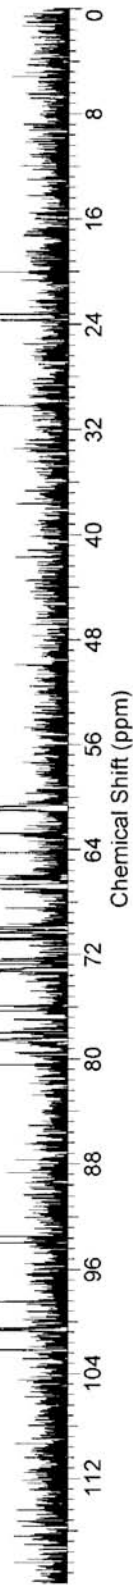

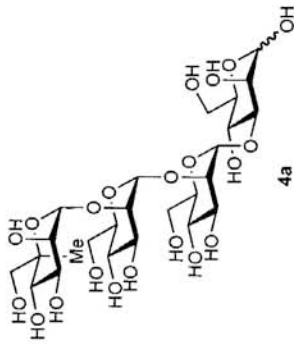

C-5 methyls  
 1.00  
 2.01  
 3.28  
 10.33  
 8.57  
 1.24  
 4.72  
 1.08  
 3.99  
 3.99  
 3.99  
 3.81  
 3.80  
 3.77  
 3.69  
 3.69  
 3.67  
 3.66  
 3.65  
 3.63  
 3.53  
 3.45

Frequency (MHz) 500.30  
 Nucleus 1H  
 Number of Transients 16  
 Origin avc500  
 Pulse Sequence zg30  
 Receiver Gain 4.00  
 SW(cyclical) (Hz) 10330.58  
 Solvent DEUTERIUM  
 OXIDE  
 Spectrum Offset (Hz) 3089.5557  
 Sweep Width (Hz) 10330.26  
 Temperature (degree C) 24.970

1.19

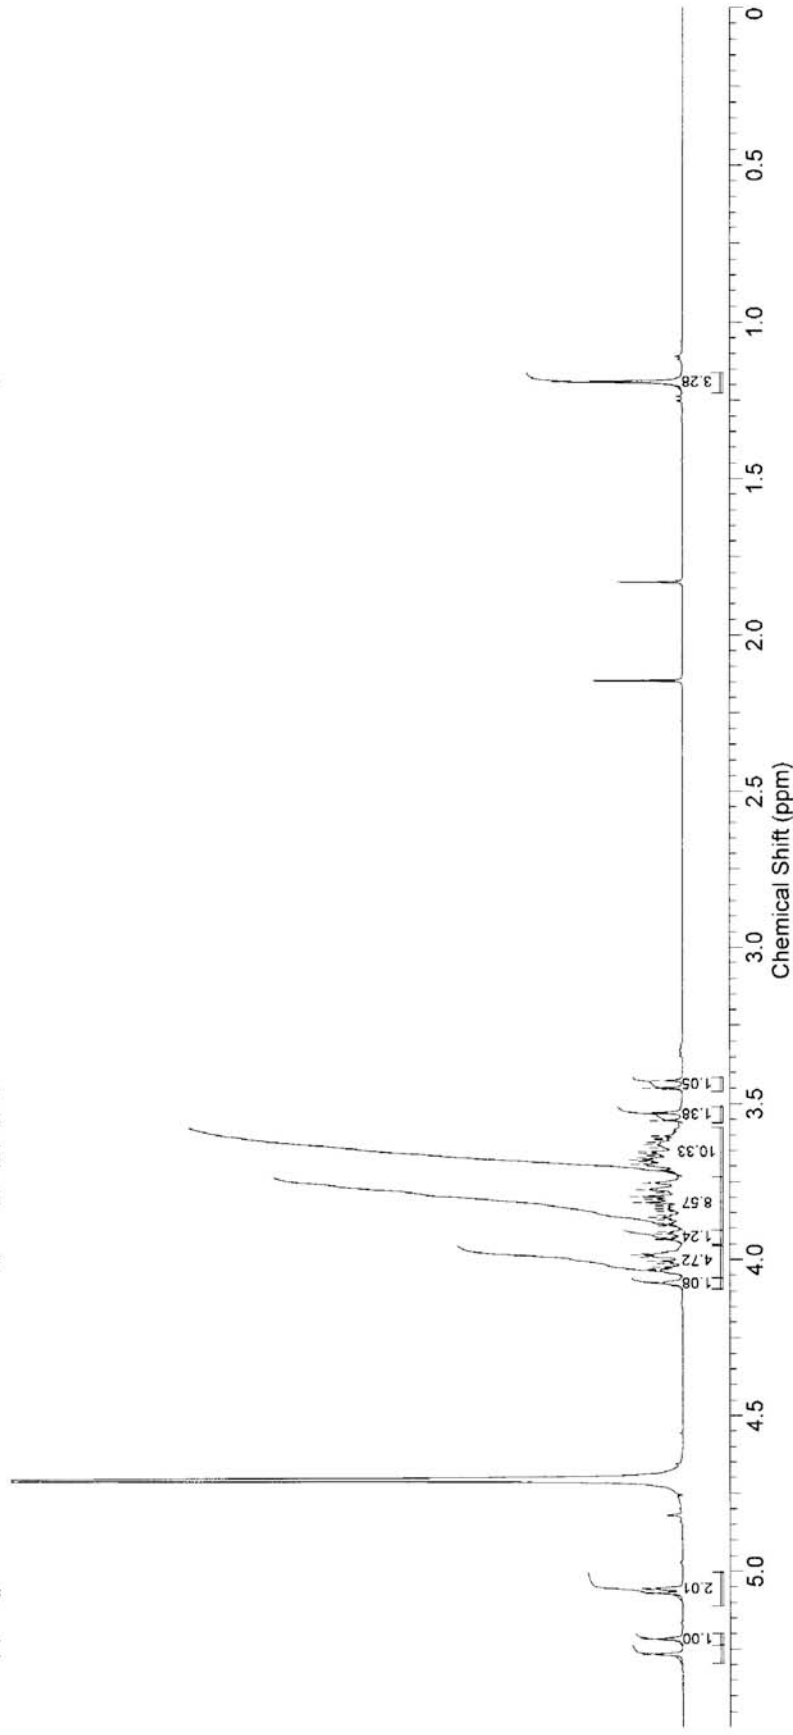



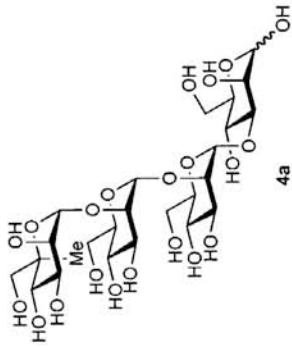

C-5 methyl tetra no linker  
 80.2, 80.4, 82.2, 78.1, 77.9, 73.3, 72.5, 70.8, 70.5, 70.3, 70.1, 67.6, 67.1, 66.9, 66.8, 66.5, 66.3, 60.9, 60.8

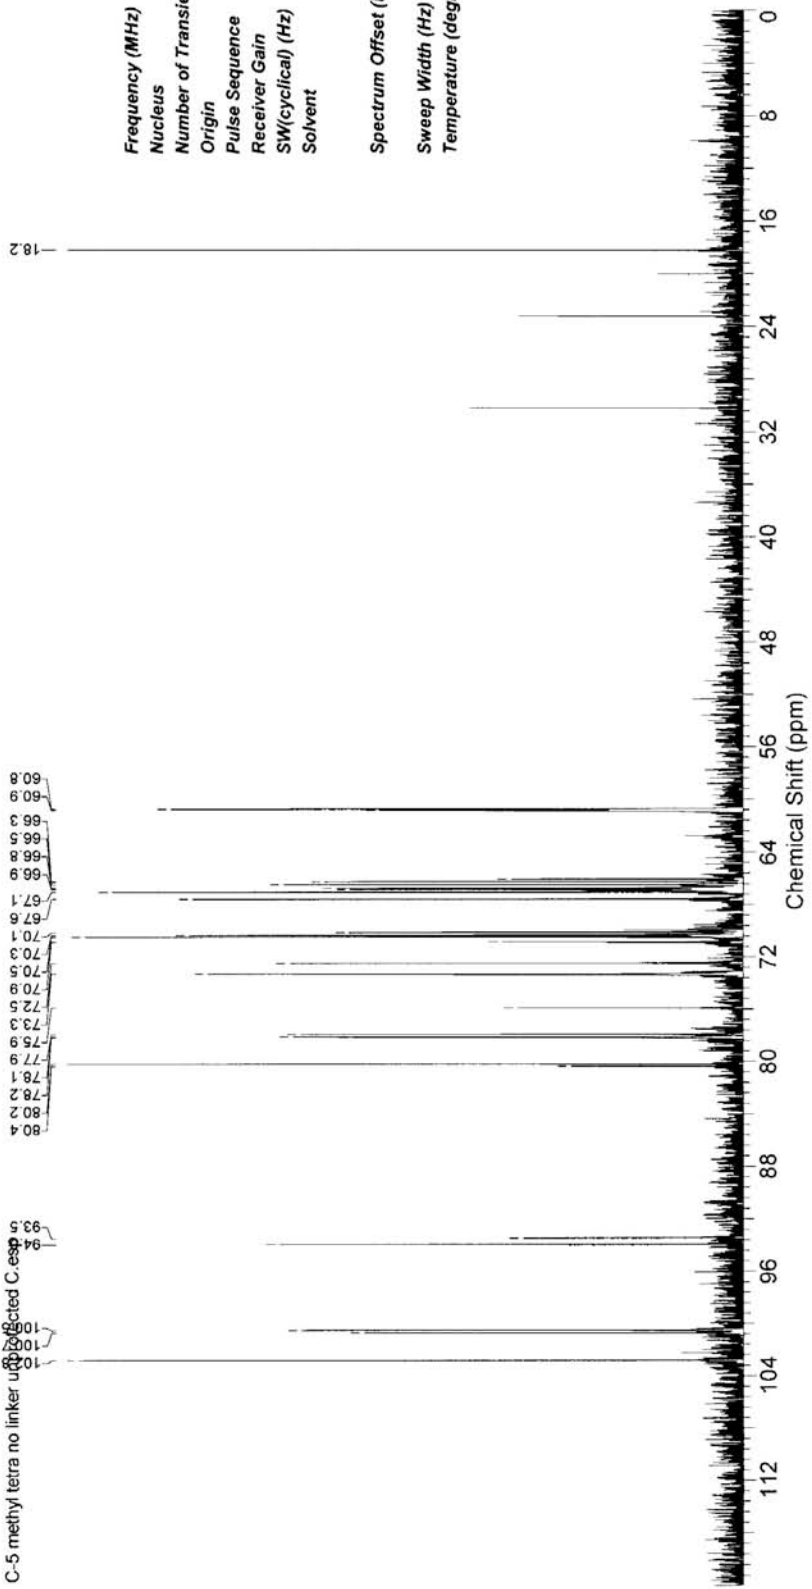

Frequency (MHz) 125.80  
 Nucleus 13C  
 Number of Transients 2048  
 Origin avc500  
 Pulse Sequence zpgg30  
 Receiver Gain 1620.00  
 SW(cyclical) (Hz) 31250.00  
 Solvent DEUTERIUM  
 Spectrum Offset (Hz) 12580.10  
 Sweep Width (Hz) 94  
 Temperature (degree C) 31249.05  
 24.970

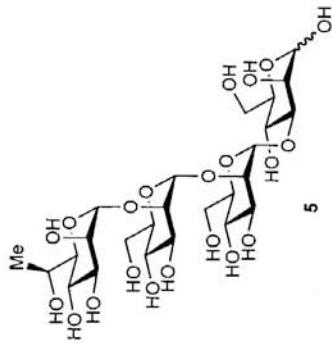

C-6 METHYL- $\beta$ -D-GLUCOPYRANOSYL-1,4:3,6-BIS-O- $\beta$ -D-GLUCOPYRANOSIDE

Frequency (MHz) 500.30  
 Nucleus  $^1\text{H}$   
 Number of Transients 16  
 Origin avc500  
 Pulse Sequence zg30  
 Receiver Gain 4.00  
 SW(cyclical) (Hz) 10330.58  
 Solvent DEUTERIUM  
 OXIDE  
 Spectrum Offset (Hz) 3089.5557  
 Sweep Width (Hz) 10330.26  
 Temperature (degree C) 27.000

1.23  
1.22

4.11  
3.59  
3.43  
3.41

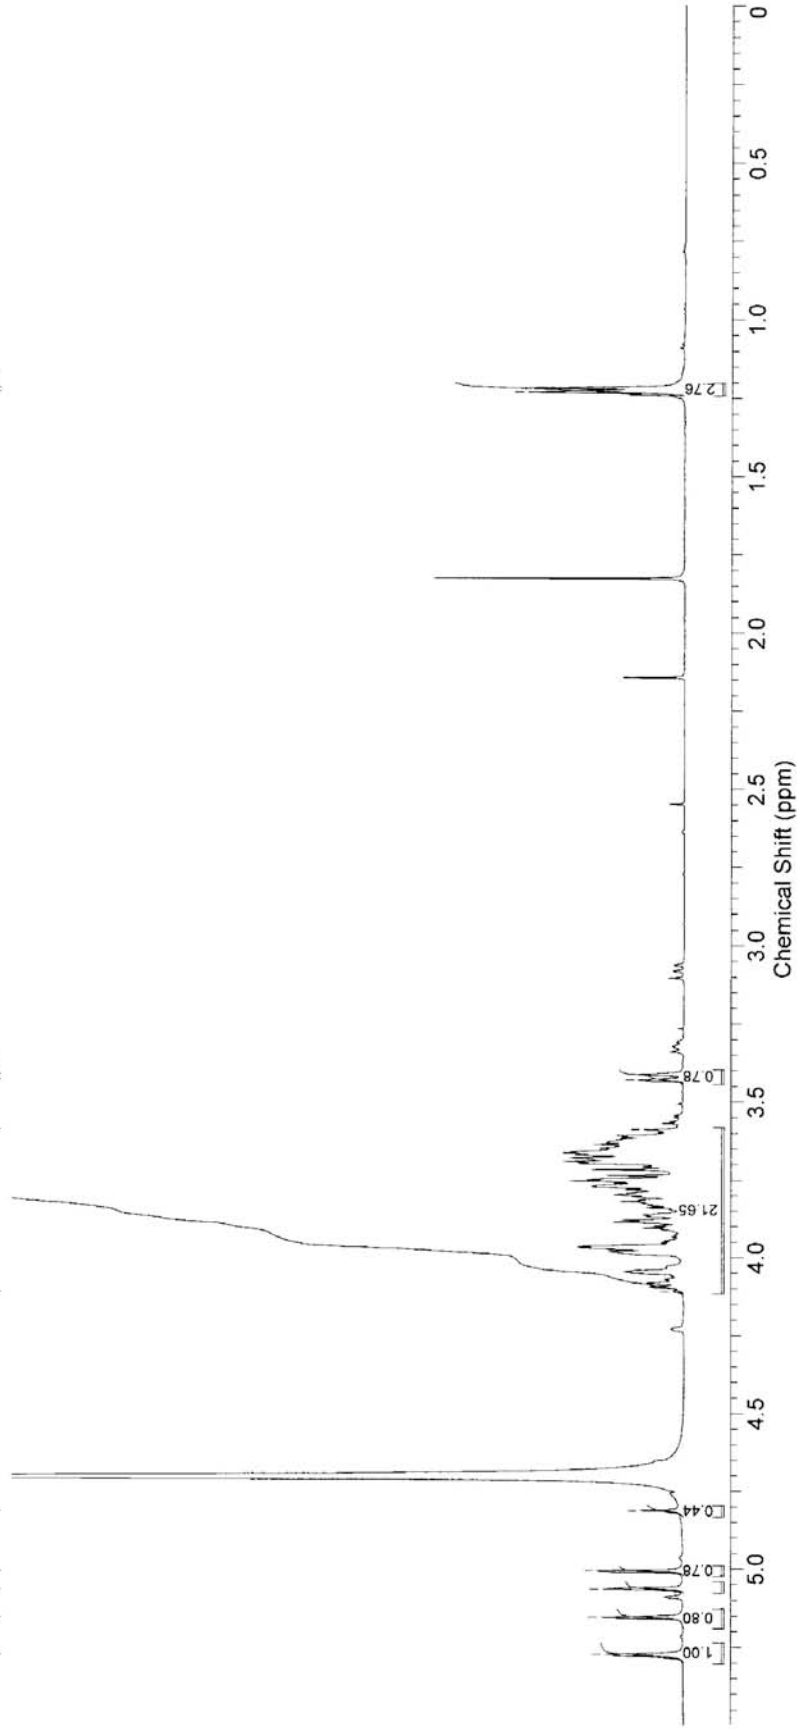

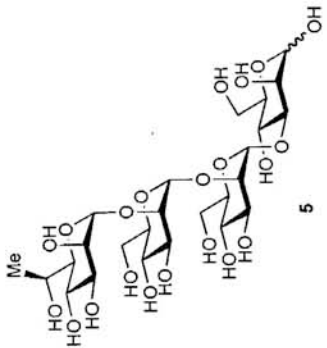

C-6 METHYL TETRA UNP-13C-ESP

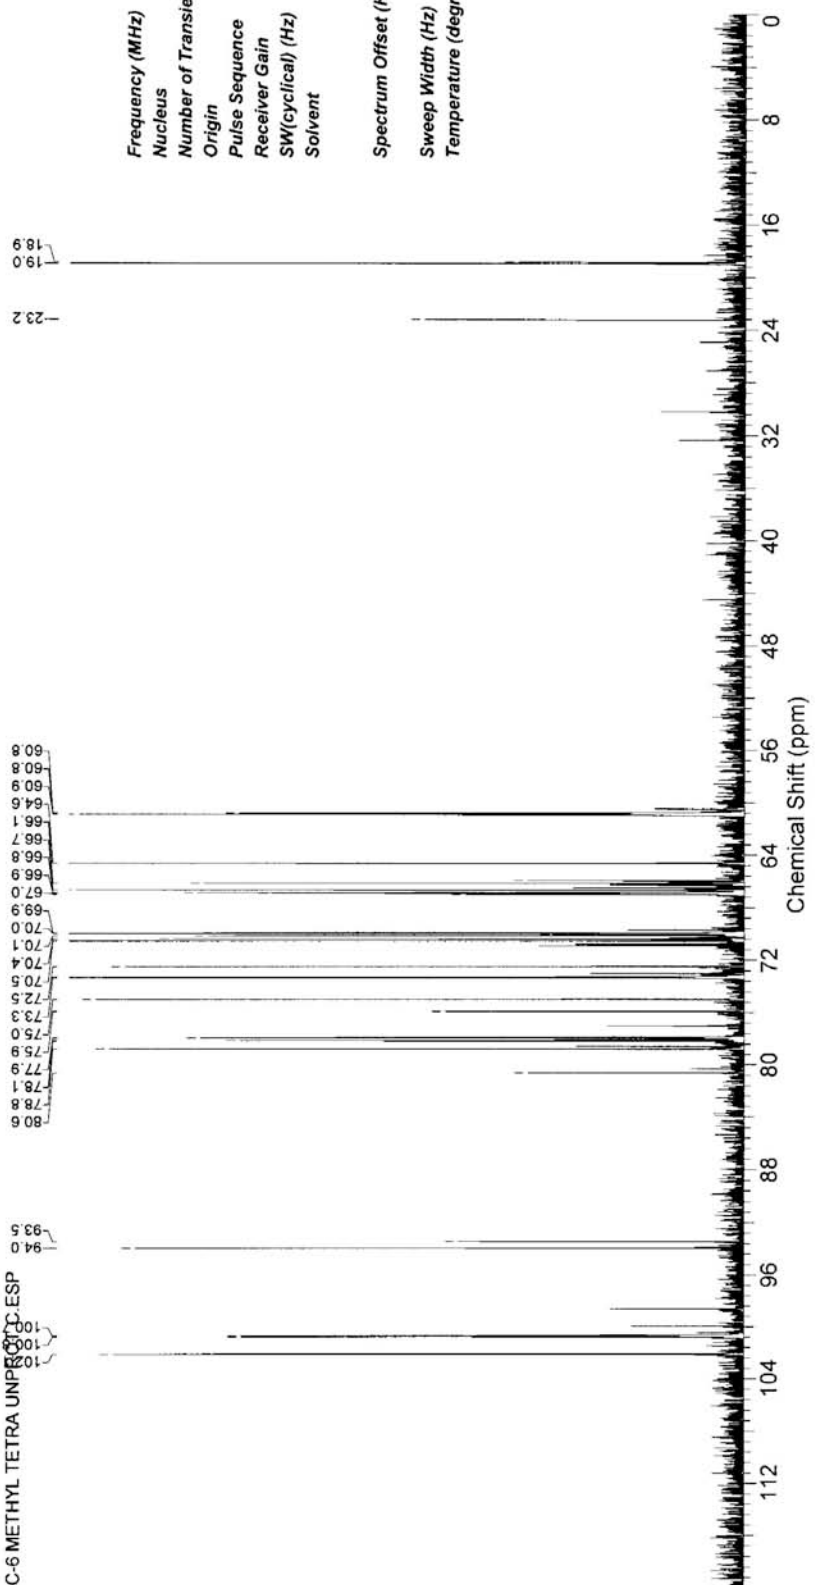

Frequency (MHz) 125.80  
 Nucleus 13C  
 Number of Transients 1024  
 Origin avc500  
 Pulse Sequence zgpg30  
 Receiver Gain 1820.00  
 SW(cyclical) (Hz) 31250.00  
 Solvent DEUTERIUM  
 Spectrum Offset (Hz) 12580.10  
 Sweep Width (Hz) 94  
 Temperature (degree C) 27.000

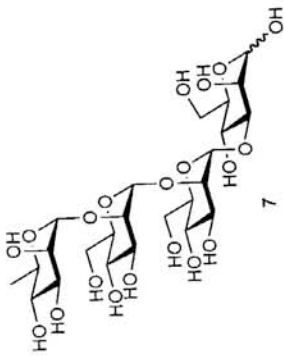

RHAM TETRA-ANTH LINEAR UNPROT HESP

4.03  
4.02  
3.99  
3.98  
3.97  
3.75  
3.71  
3.70  
3.69  
3.68  
3.67  
3.67  
3.63  
3.63  
3.62  
3.38  
3.36  
3.34

Frequency (MHz) 500.30  
Nucleus 1H  
Number of Transients 16  
Origin avc500  
Pulse Sequence zg30  
Receiver Gain 4.00  
SW(cyclical) (Hz) 10330.58  
Solvent DEUTERIUM OXIDE  
Spectrum Offset (Hz) 3089.5557  
Sweep Width (Hz) 10330.26  
Temperature (degree C) 27.000

1.19  
1.18  
1.09  
1.08

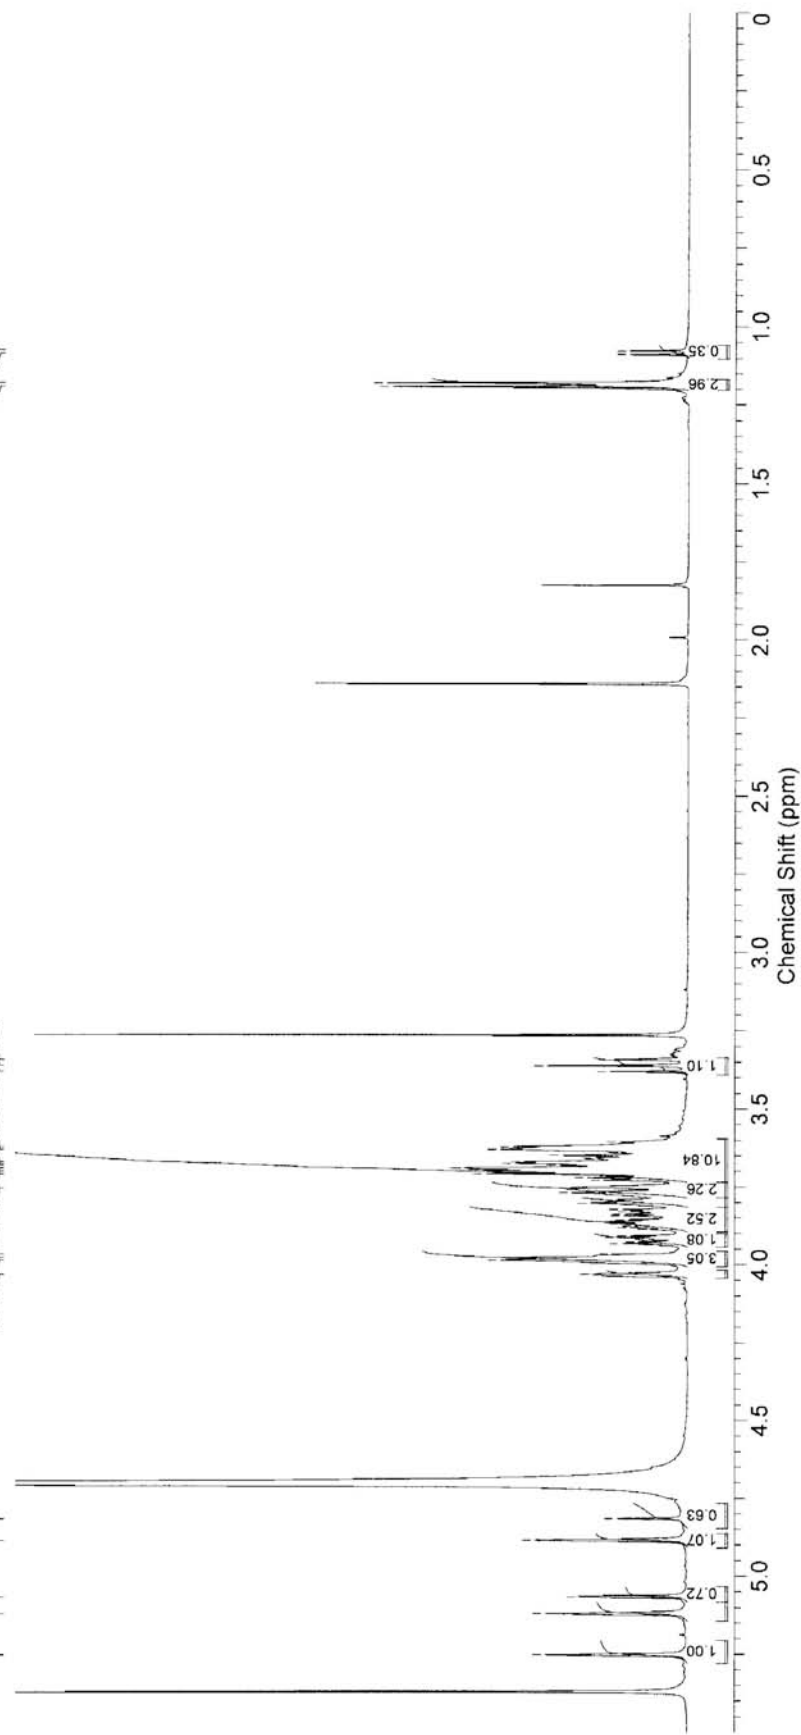

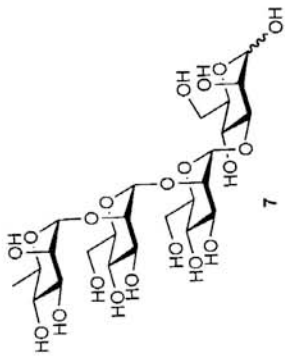

RHAM TETRA NO LINKER 100% PROTON C-ESR

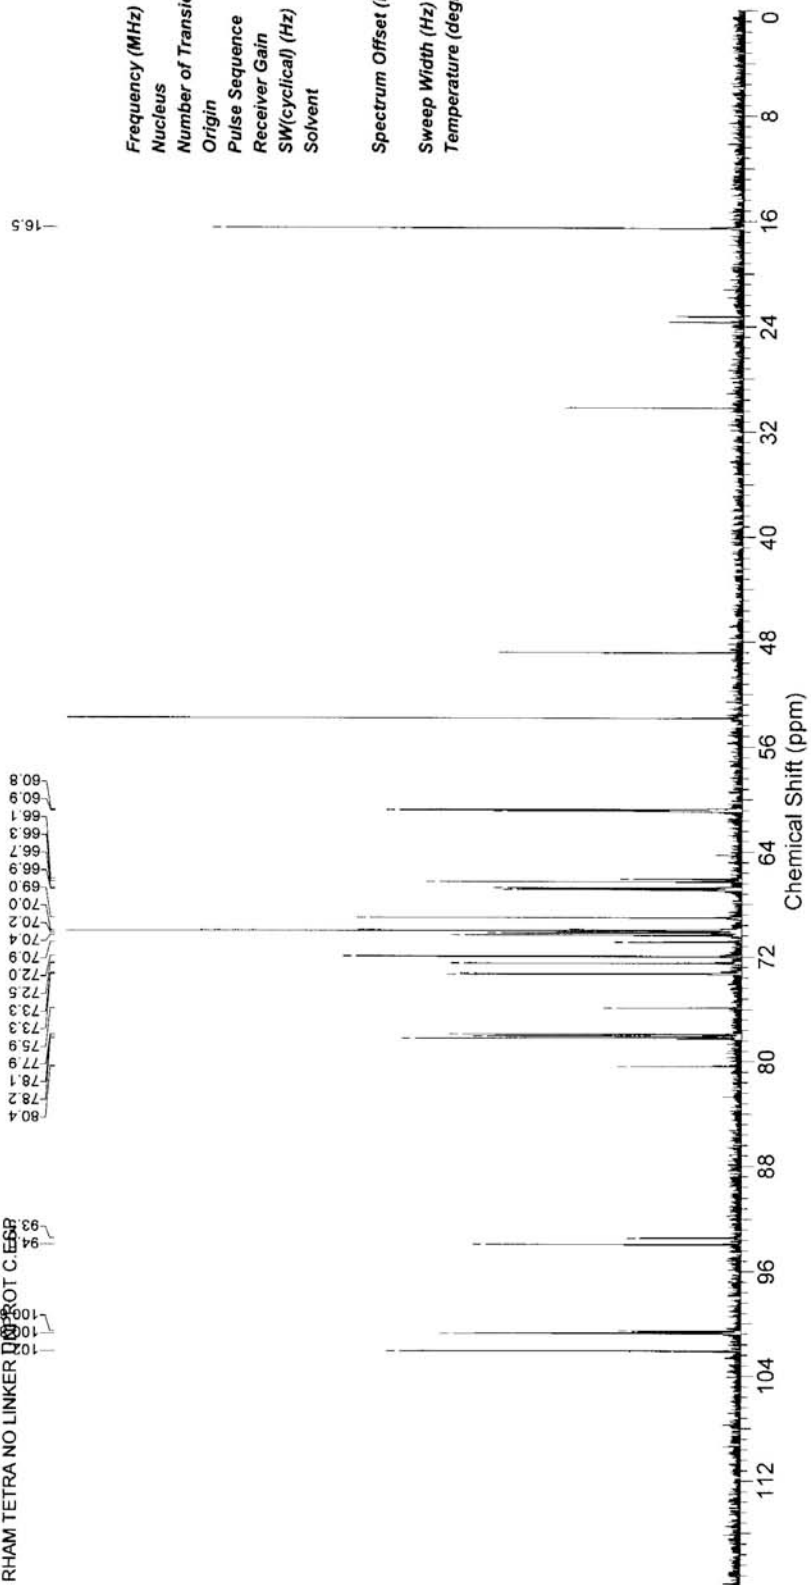

Frequency (MHz) 125.80  
 Nucleus <sup>13</sup>C  
 Number of Transients 512  
 Origin avc500  
 Pulse Sequence zpgp30  
 Receiver Gain 1820.00  
 SW(cyclical) (Hz) 31250.00  
 Solvent DEUTERIUM  
 Spectrum Offset (Hz) 12580.10  
 Sweep Width (Hz) 94  
 Temperature (degree C) 27.000

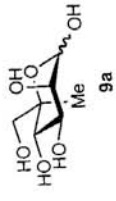

methyl monomer 9a.esp

Frequency (MHz) 500.30  
 Nucleus 1H  
 Number of Transients 16  
 Origin avc500  
 Pulse Sequence zg30  
 Receiver Gain 4.00  
 SW(cyclical) (Hz) 10330.58  
 Solvent DEUTERIUM  
 OXIDE  
 Spectrum Offset (Hz) 3089.5557  
 Sweep Width (Hz) 10330.26  
 Temperature (degree C) 24.970

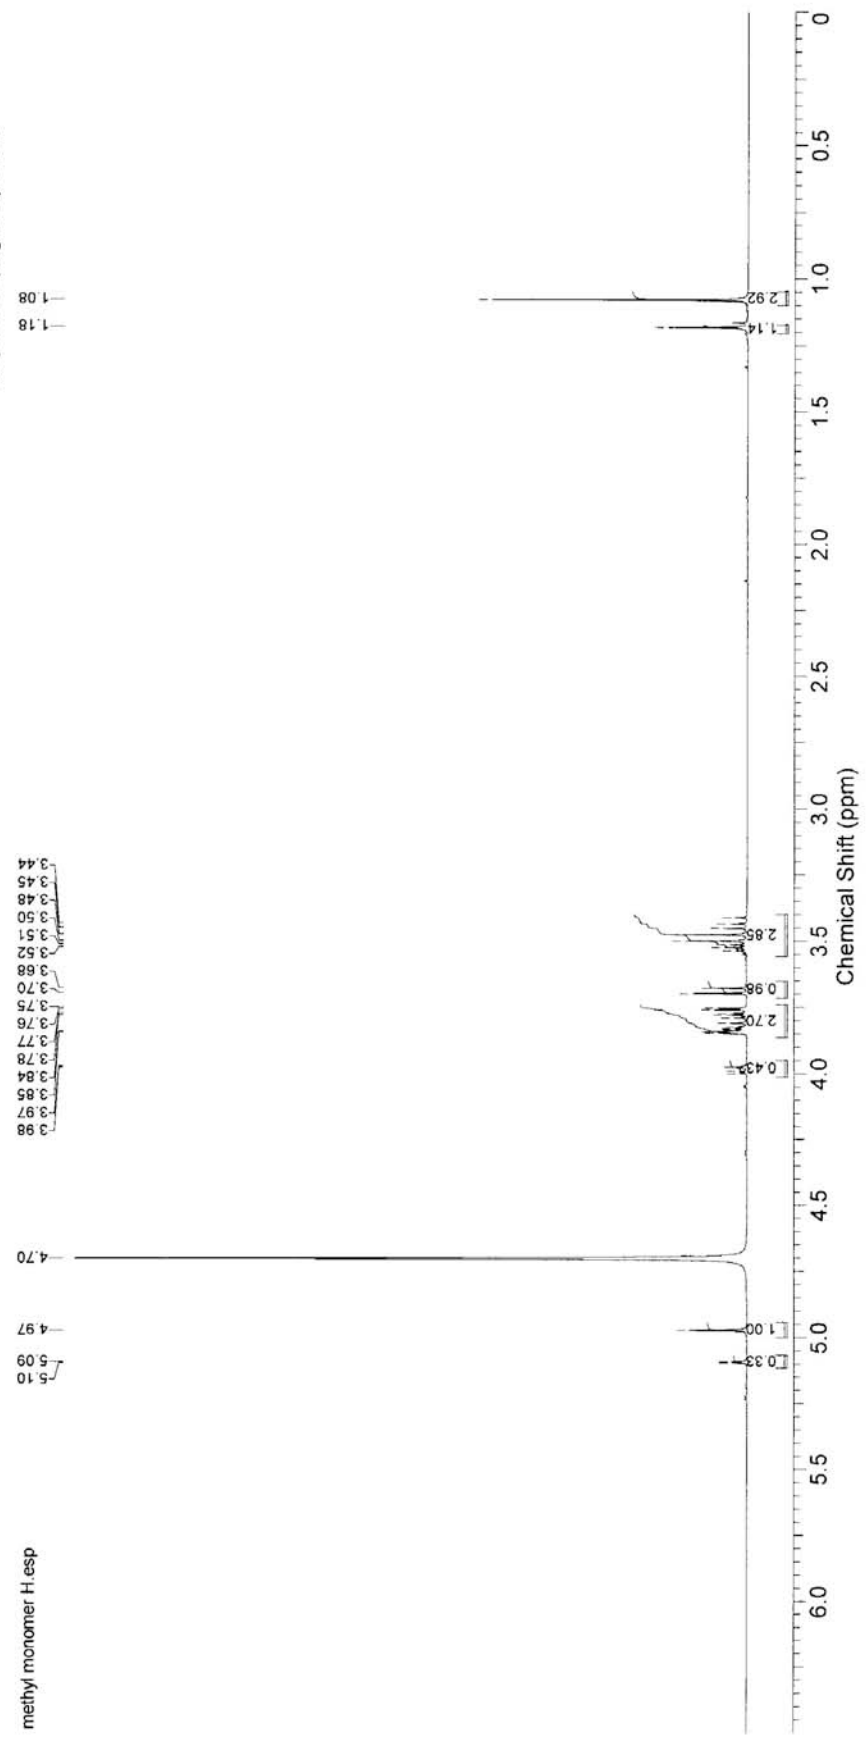

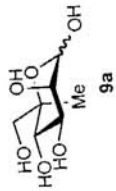

methyl monomer C.esp

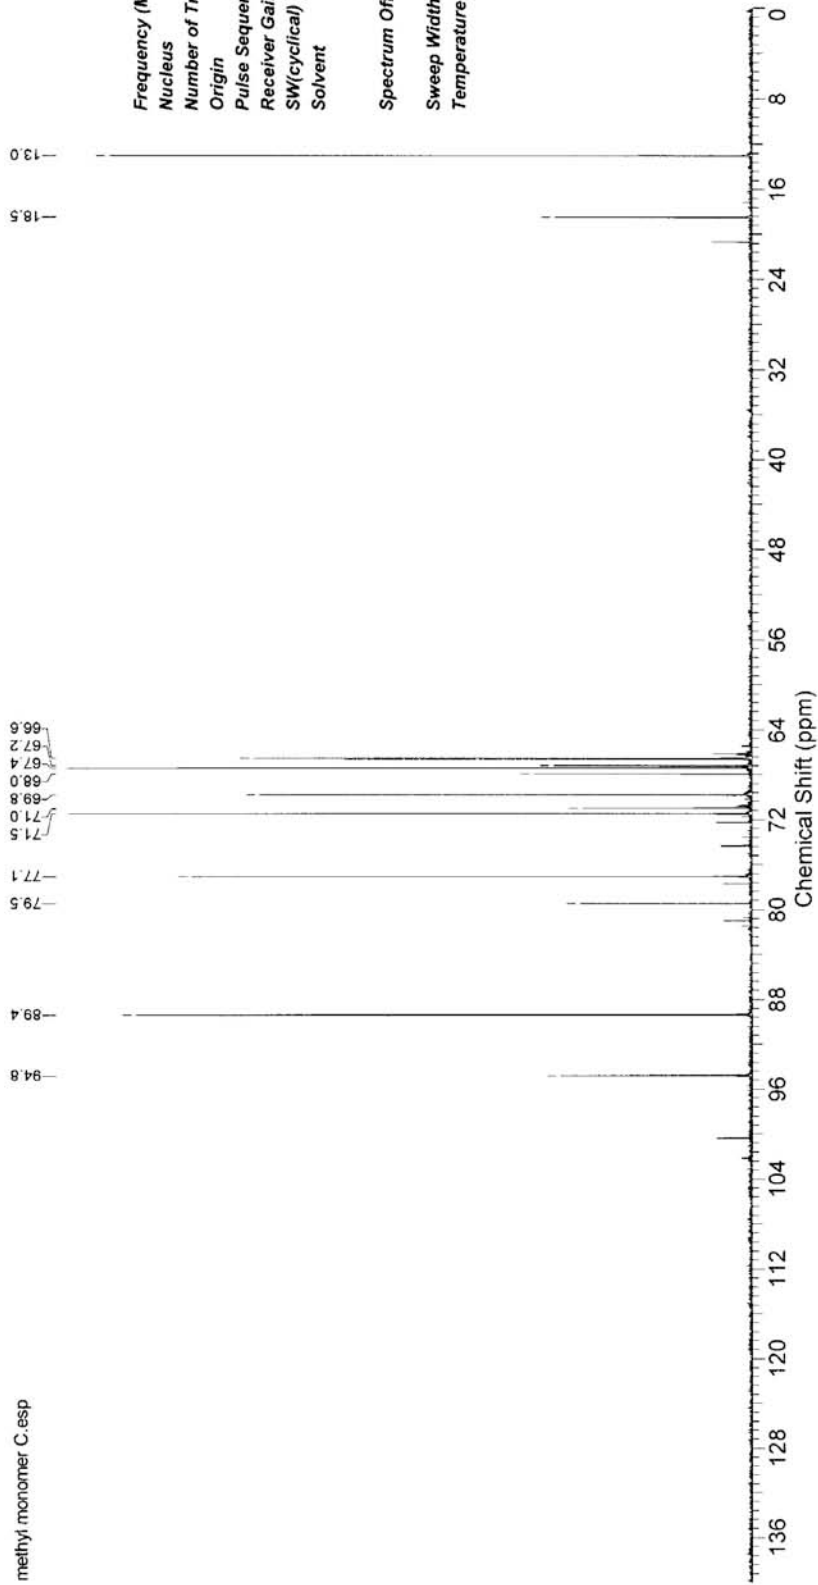

Frequency (MHz) 125.80  
 Nucleus <sup>13</sup>C  
 Number of Transients 2048  
 Origin avc500  
 Pulse Sequence zgpg30  
 Receiver Gain 1820.00  
 SW(cyclical) (Hz) 31250.00  
 Solvent DEUTERIUM  
 Spectrum Offset (Hz) 12580.10  
 Sweep Width (Hz) 94  
 Temperature (degree C) 24.970

Frequency (MHz) 500.30  
 Nucleus  $^1\text{H}$   
 Number of Transients 16  
 Origin avc500  
 Pulse Sequence zg30  
 Receiver Gain 4.00  
 SW(cyclical) (Hz) 10330.58  
 Solvent DEUTERIUM  
 OXIDE

Spectrum Offset (Hz) 3089.6072  
 Sweep Width (Hz) 10330.26  
 Temperature (degree C) 24.970

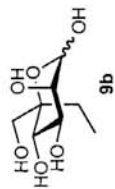

ETHYL MONOMER H.E.S.F.

4.30  
4.30  
4.30  
4.30  
4.29  
4.12  
3.98  
3.93  
3.91  
3.89  
3.85  
3.84  
3.84  
3.84  
3.80  
3.80  
3.78  
3.78  
3.63  
3.61  
3.55  
3.51  
3.49

1.71  
1.69  
1.68  
1.68  
1.66  
1.62  
1.58  
1.52  
1.45  
1.45  
1.43  
1.42  
1.40  
1.39  
1.37  
0.80  
0.79  
0.77

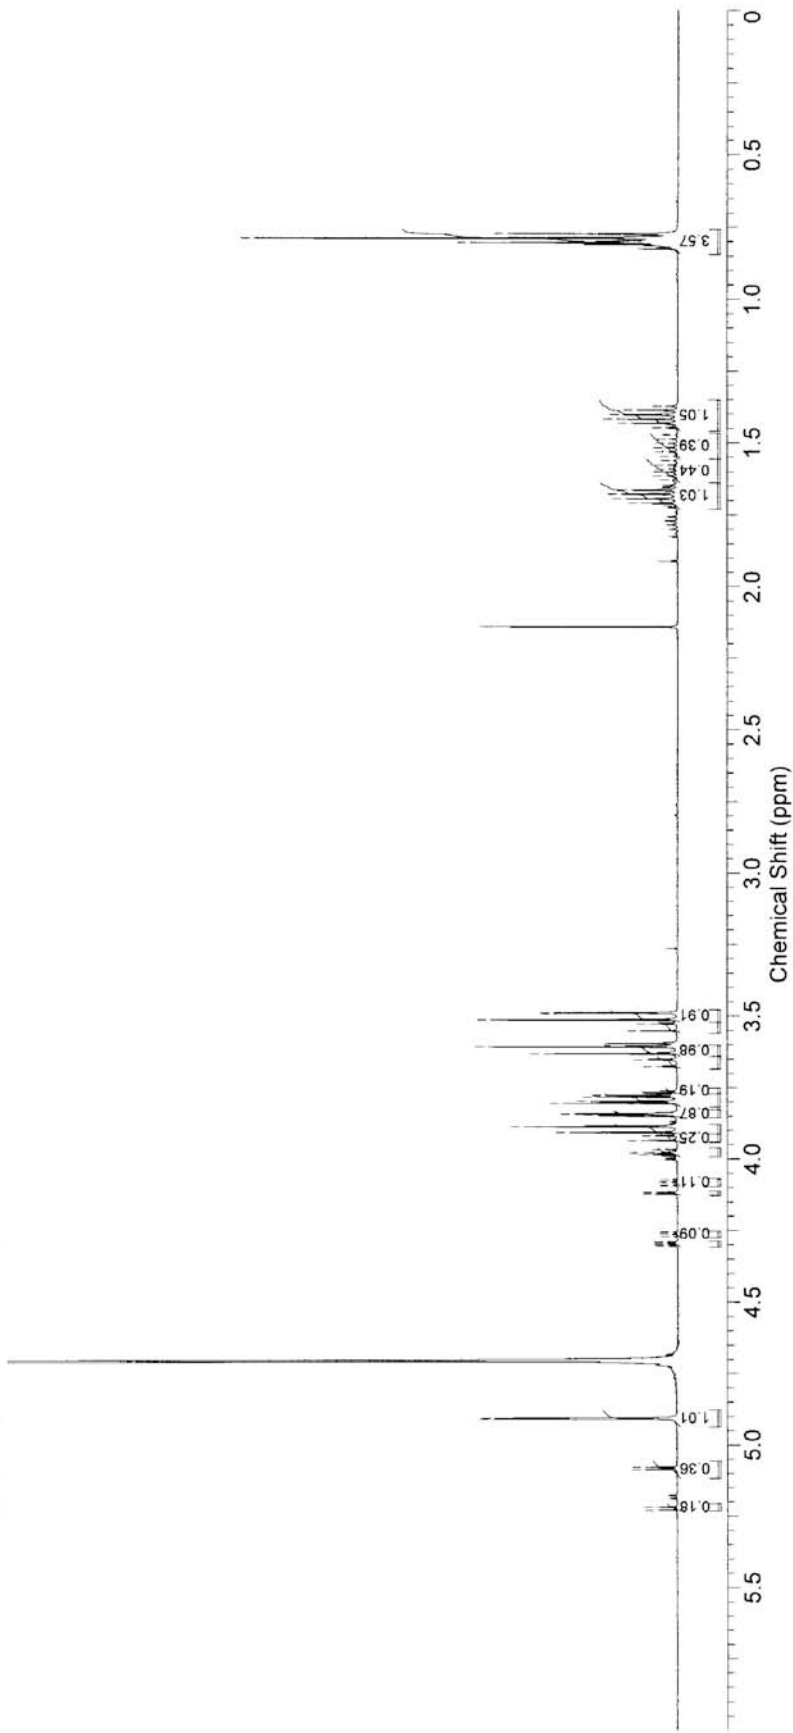



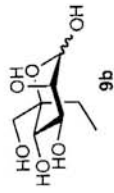

kd47112806\_002000fid

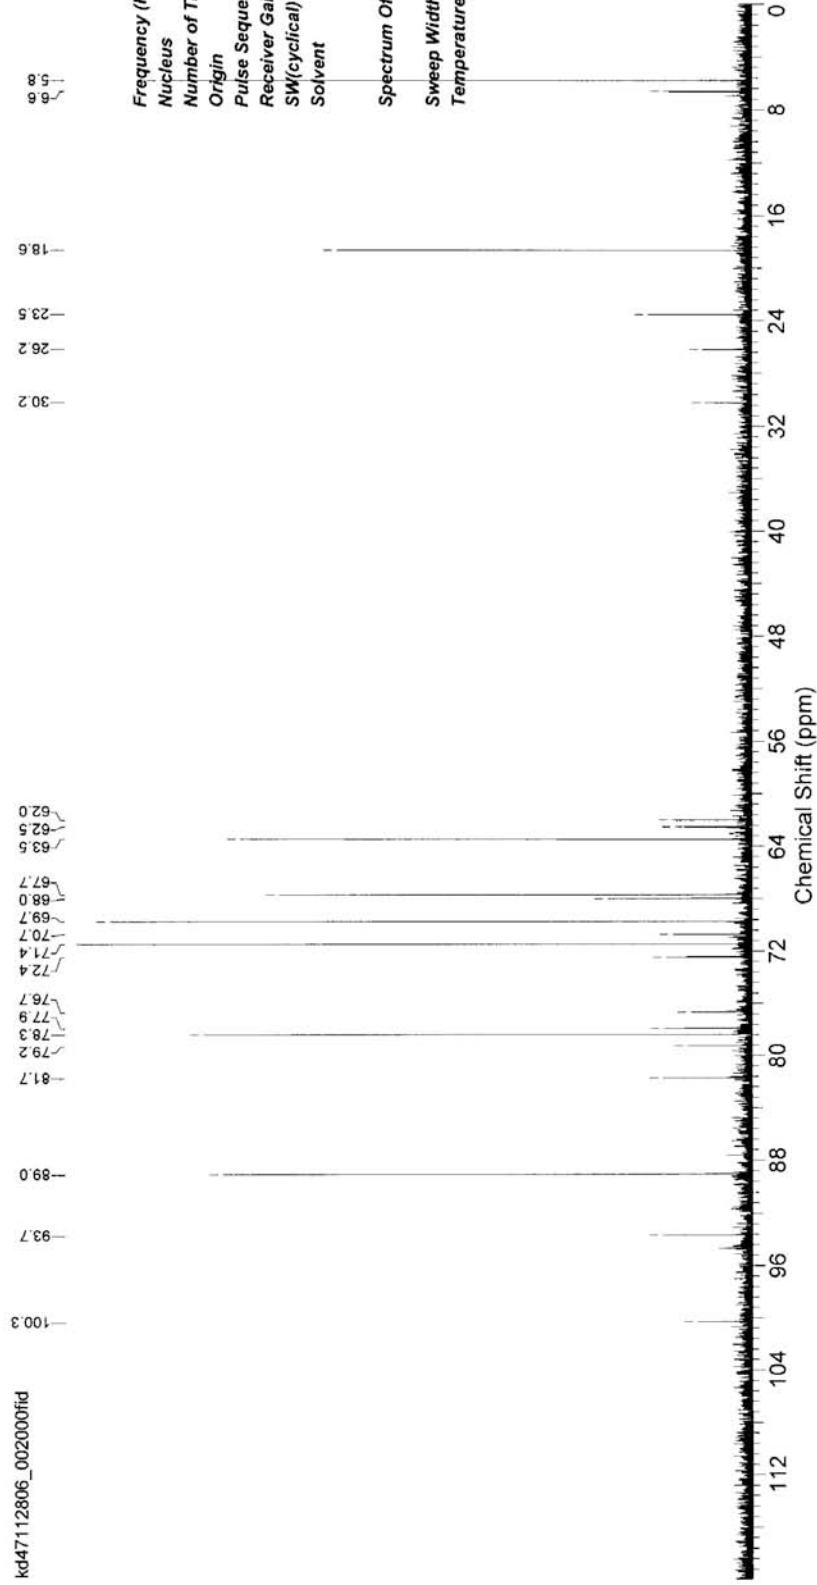

Frequency (MHz) 125.81  
 Nucleus 13C  
 Number of Transients 256  
 Origin avc500  
 Pulse Sequence zgpg30  
 Receiver Gain 1620.00  
 SW(cyclical) (Hz) 31250.00  
 Solvent DEUTERIUM  
 Spectrum Offset (Hz) 12582.93  
 Sweep Width (Hz) 07  
 Temperature (degree C) 31249.05

Frequency (MHz) 400.20  
 Nucleus <sup>1</sup>H  
 Number of Transients 16  
 Origin av400  
 Pulse Sequence zg60  
 Receiver Gain 90.50  
 SW(cyclical) (Hz) 8278.15  
 Solvent DEUTERIUM  
 OXIDE  
 Spectrum Offset (Hz) 2471.3989  
 Sweep Width (Hz) 8277.89  
 Temperature (degree C) 23.500

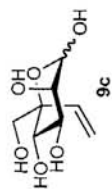

kjd9-86 H.esf

5.87  
 5.84  
 5.82  
 5.80  
 5.41  
 5.39  
 5.35  
 5.31  
 4.95  
 3.84  
 3.81  
 3.78  
 3.77  
 3.55  
 3.54  
 3.53  
 3.52  
 3.51  
 3.50  
 3.26  
 3.33

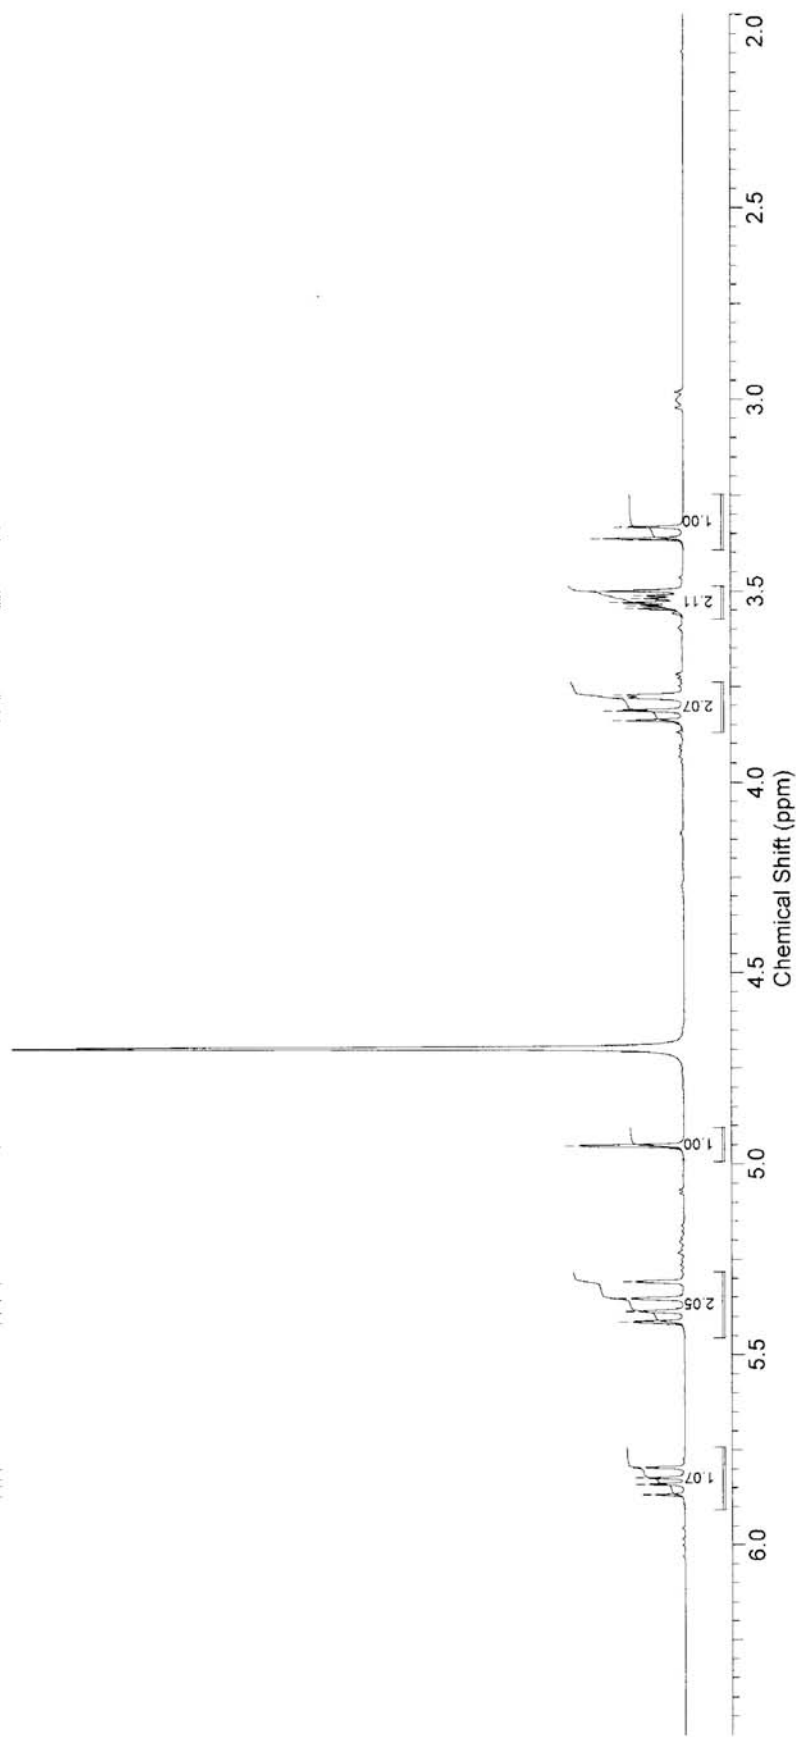

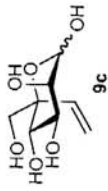

Jun12-2006-8\_004001r

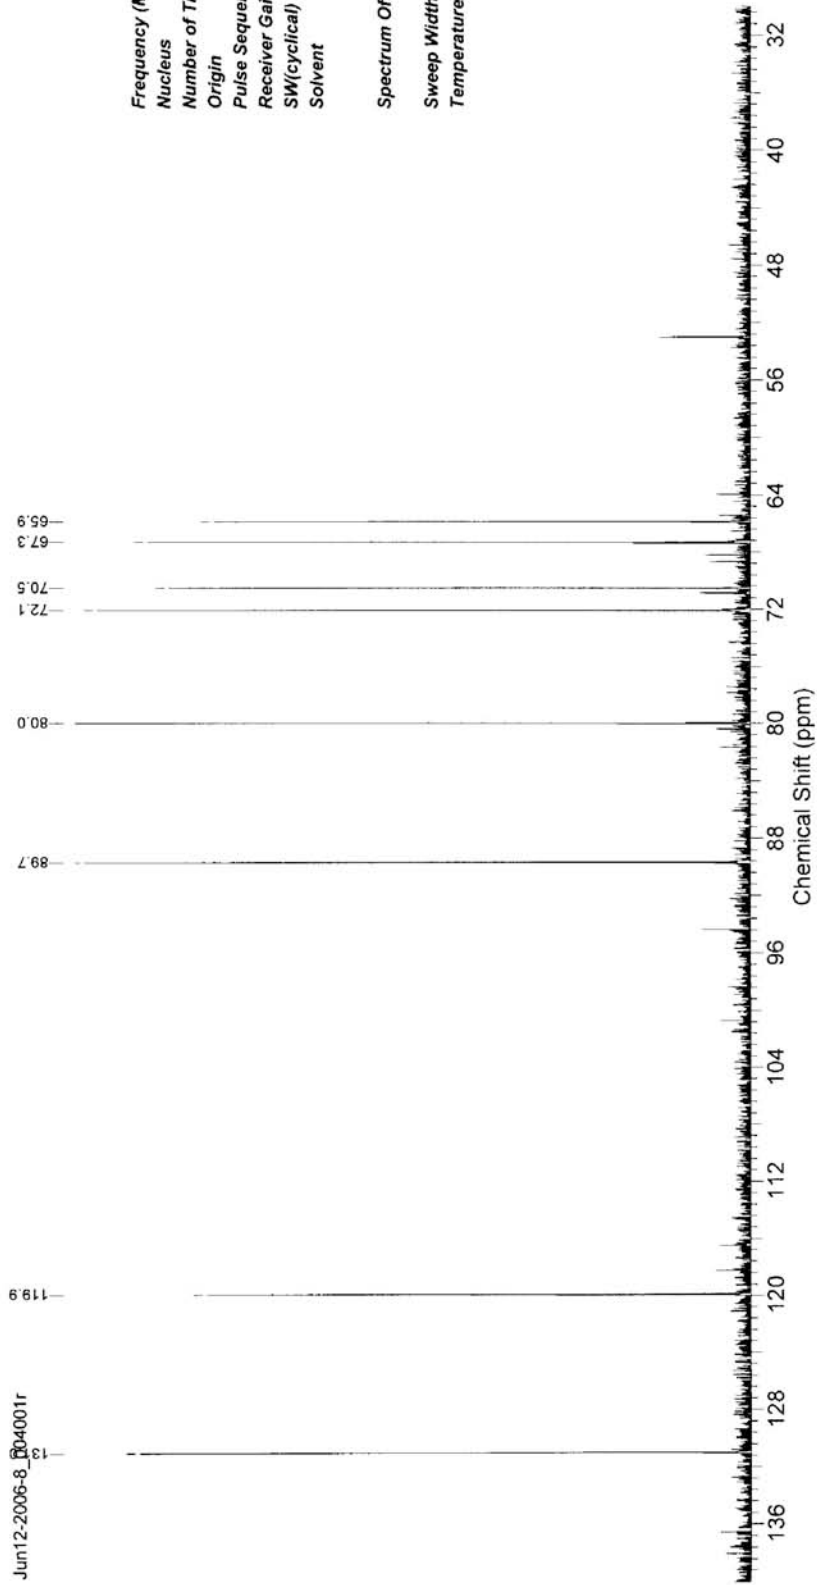

Frequency (MHz) 100.63  
 Nucleus <sup>13</sup>C  
 Number of Transients 256  
 Origin av400  
 Pulse Sequence zgpg30  
 Receiver Gain 32768.00  
 SW(cyclical) (Hz) 26178.01  
 Solvent DEUTERIUM  
 Spectrum Offset (Hz) 10063.05  
 Sweep Width (Hz) 66  
 Temperature (degree C) 23.900

Frequency (MHz) 400.20  
 Nucleus 1H  
 Number of Transients 16  
 Origin av400  
 Pulse Sequence zg60  
 Receiver Gain 143.70  
 SW(cyclical) (Hz) 8278.15  
 Solvent DEUTERIUM  
 OXIDE  
 Spectrum Offset (Hz) 2471.3989  
 Sweep Width (Hz) 8277.89  
 Temperature (degree C) 23.100

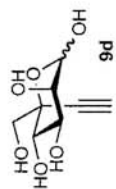

kjd10-12 H.esp

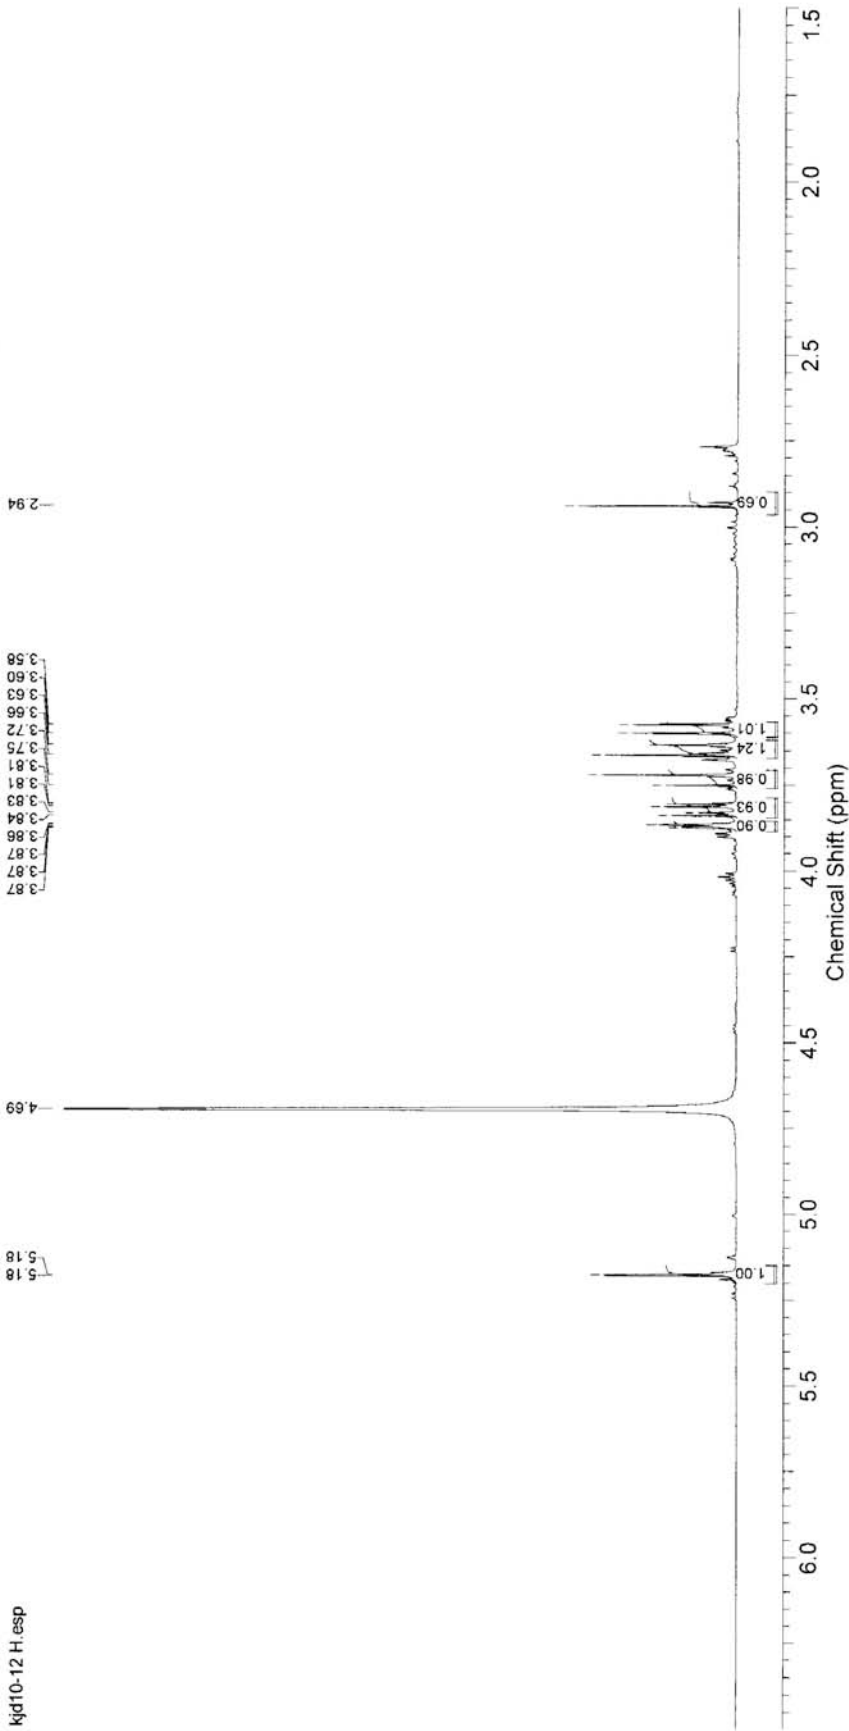

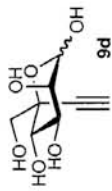

Jun26-2006-34\_004001r

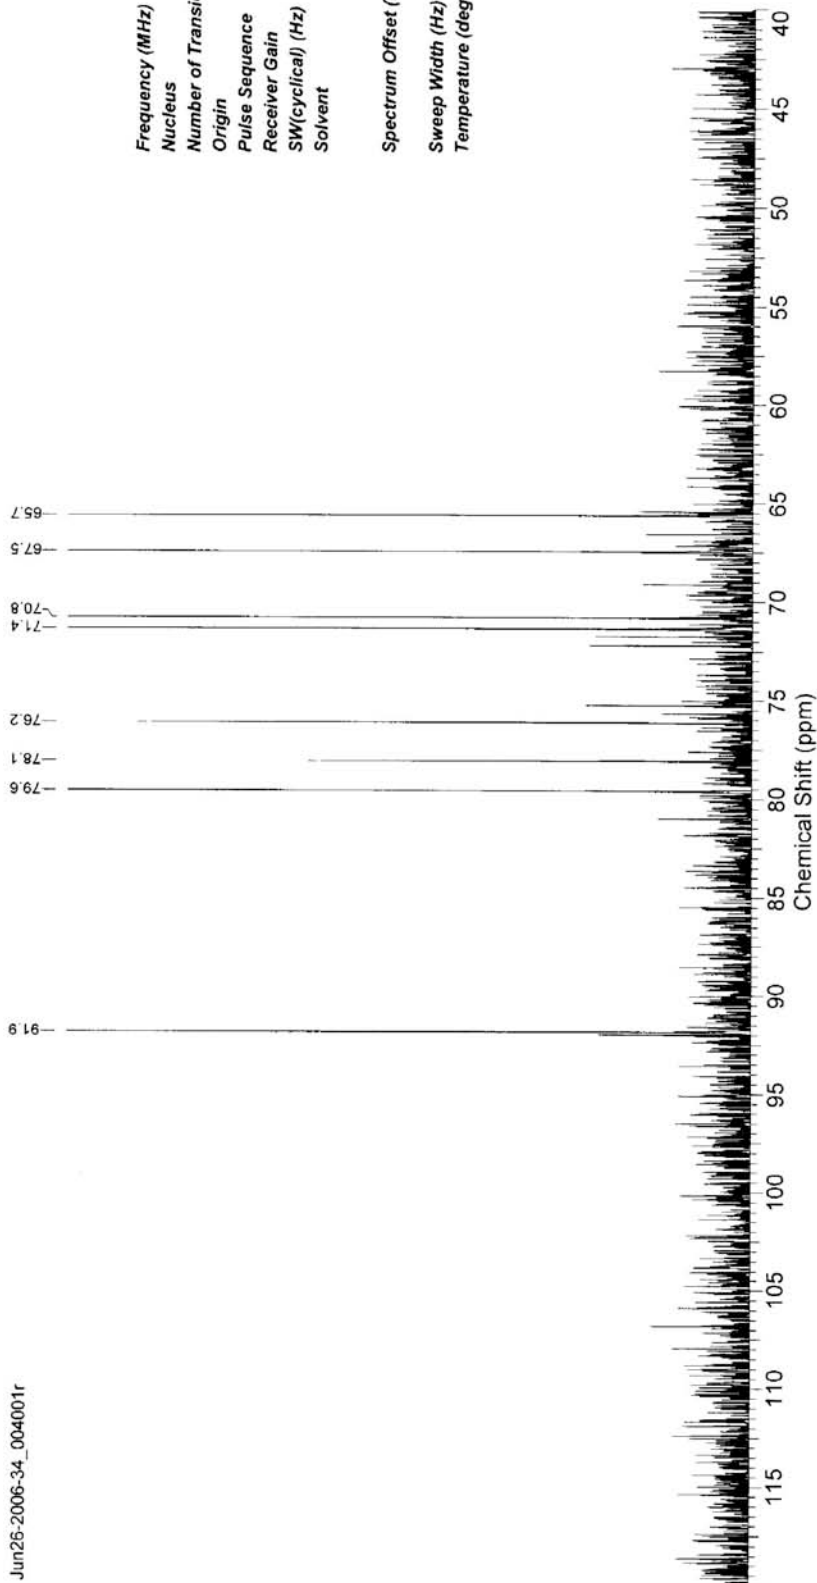

Frequency (MHz) 100.63  
 Nucleus <sup>13</sup>C  
 Number of Transients 256  
 Origin av400  
 Pulse Sequence zgpg30  
 Receiver Gain 32768.00  
 SW(cyclical) (Hz) 26178.01  
 Solvent DEUTERIUM  
 Spectrum Offset (Hz) 10063.05  
 Sweep Width (Hz) 66  
 Temperature (degree C) 23.000

Frequency (MHz) 500.30  
 Nucleus  $^1\text{H}$   
 Number of Transients 16  
 Origin avc500  
 Pulse Sequence zg30  
 Receiver Gain 4.00  
 SW(cyclical) (Hz) 10330.58  
 Solvent DEUTERIUM  
 OXIDE  
 Spectrum Offset (Hz) 3089.6072  
 Sweep Width (Hz) 10330.26  
 Temperature (degree C) 24.970

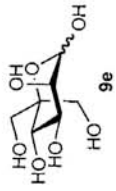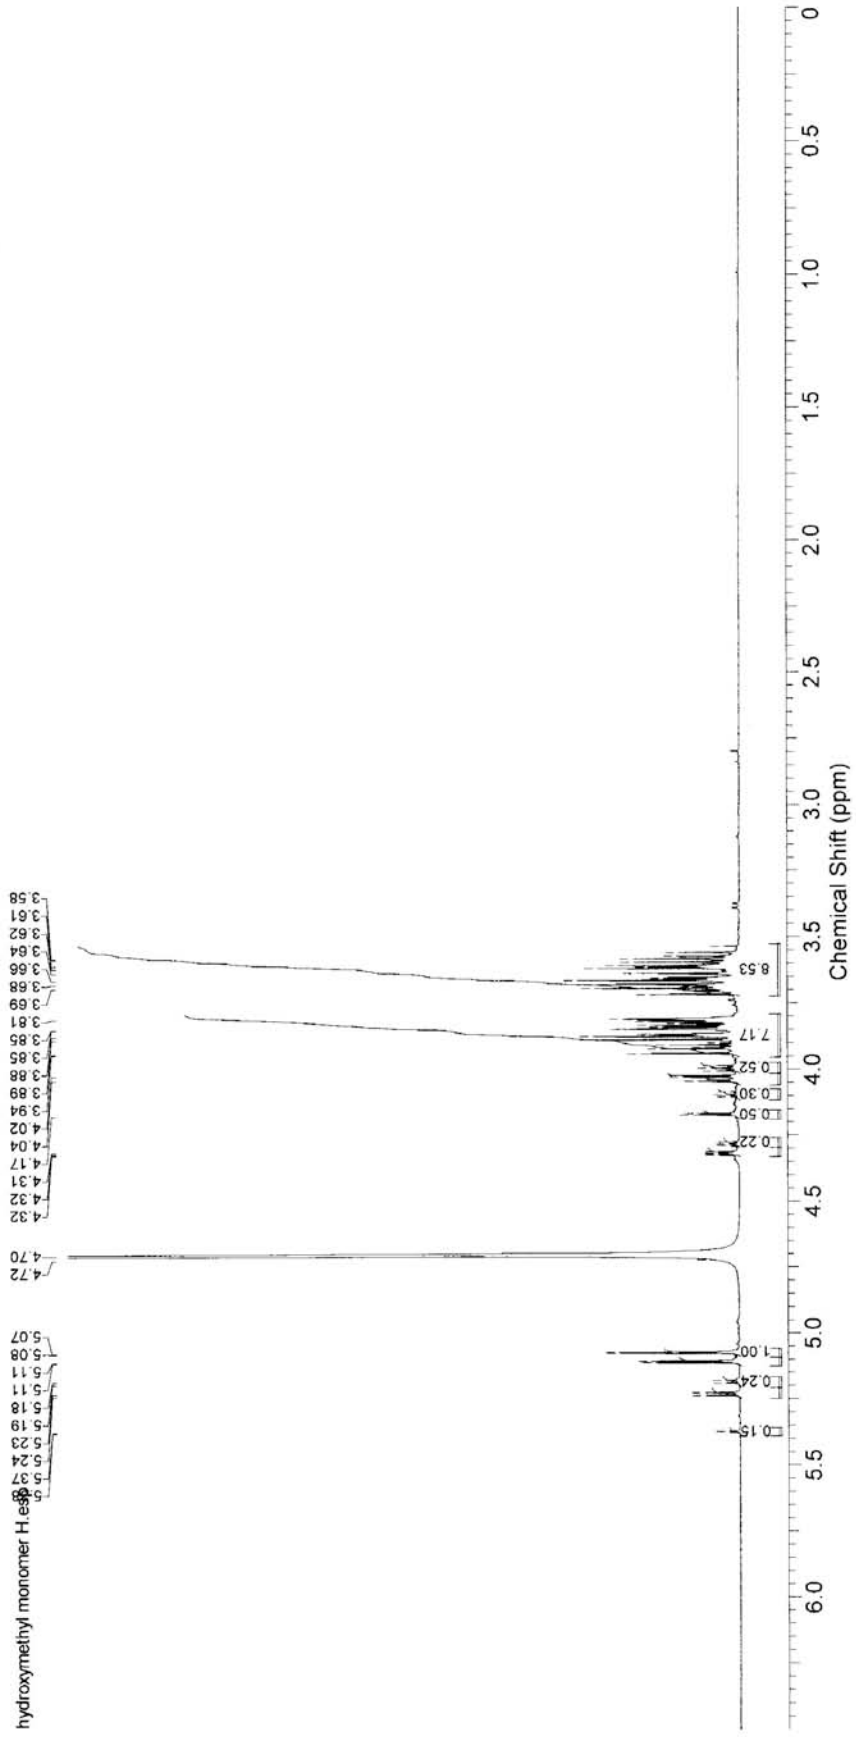

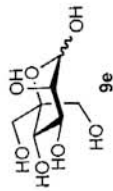

KD47142906\_002000fid

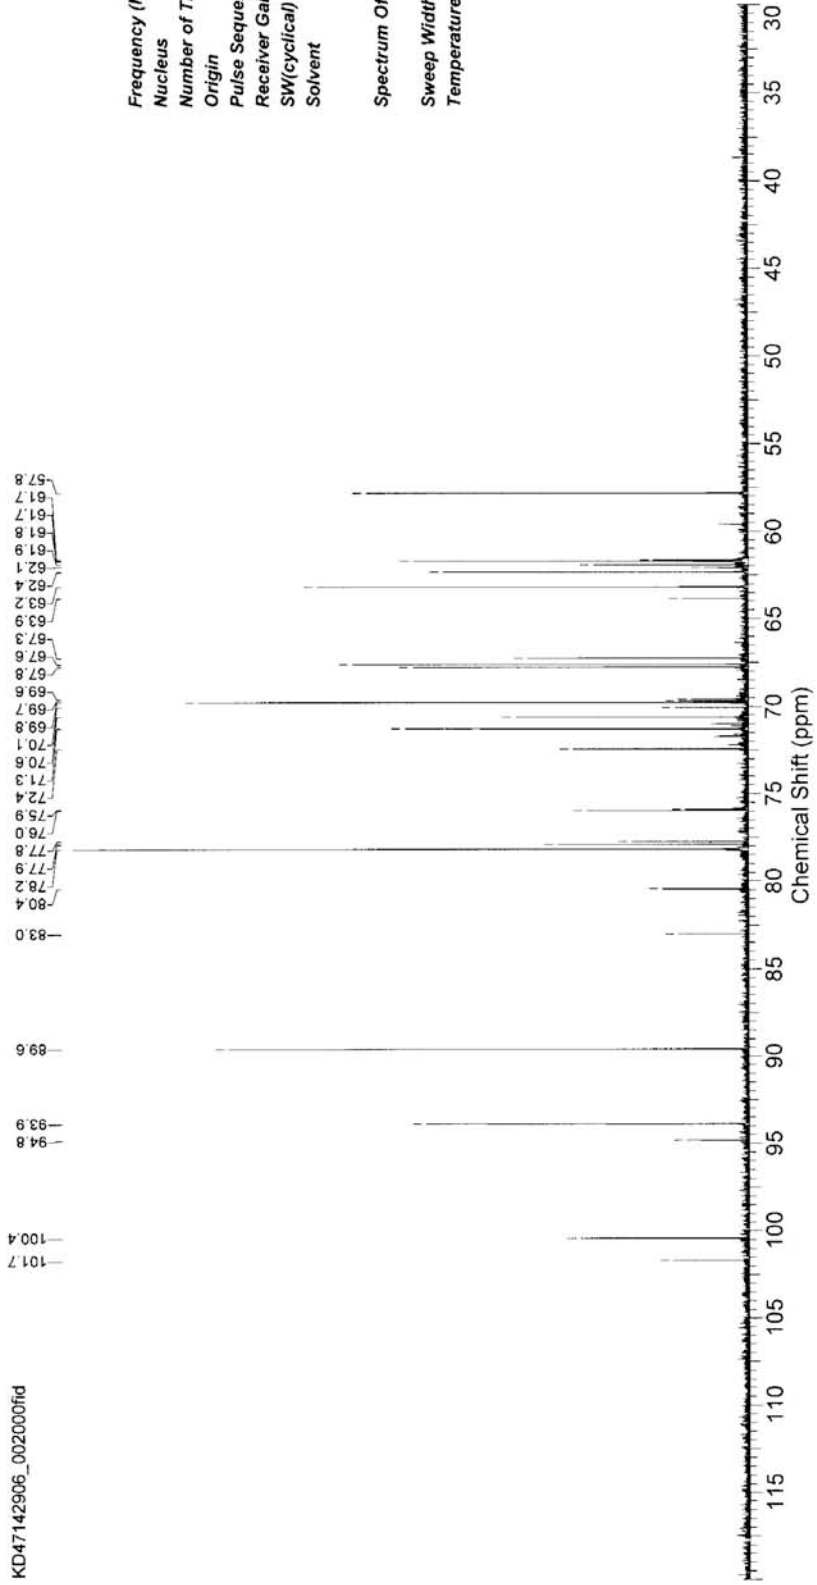

Frequency (MHz) 125.81  
 Nucleus 13C  
 Number of Transients 256  
 Origin avc500  
 Pulse Sequence zgpg30  
 Receiver Gain 1620.00  
 SW(cyclical) (Hz) 31250.00  
 Solvent DEUTERIUM  
 Spectrum Offset (Hz) 12582.93  
 Sweep Width (Hz) 31249.05  
 Temperature (degree C) 24.970

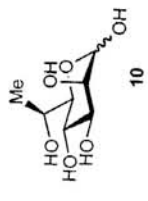

6-Methyl monomer H. esp

Frequency (MHz) 400.20  
 Nucleus 1H  
 Number of Transients 16  
 Origin av400  
 Pulse Sequence zg60  
 Receiver Gain 40.30  
 SW(cyclical) (Hz) 8278.15  
 Solvent DEUTERIUM  
 OXIDE  
 Spectrum Offset (Hz) 2471.3989  
 Sweep Width (Hz) 8277.89  
 Temperature (degree C) 27.000

1.17  
1.16  
1.14  
1.13

4.06  
4.05  
4.04  
3.80  
3.79  
3.71  
3.69  
3.68  
3.66  
3.63  
3.60  
3.58  
3.53  
3.52  
3.44  
3.42  
3.23  
3.02  
3.02  
3.00  
2.99

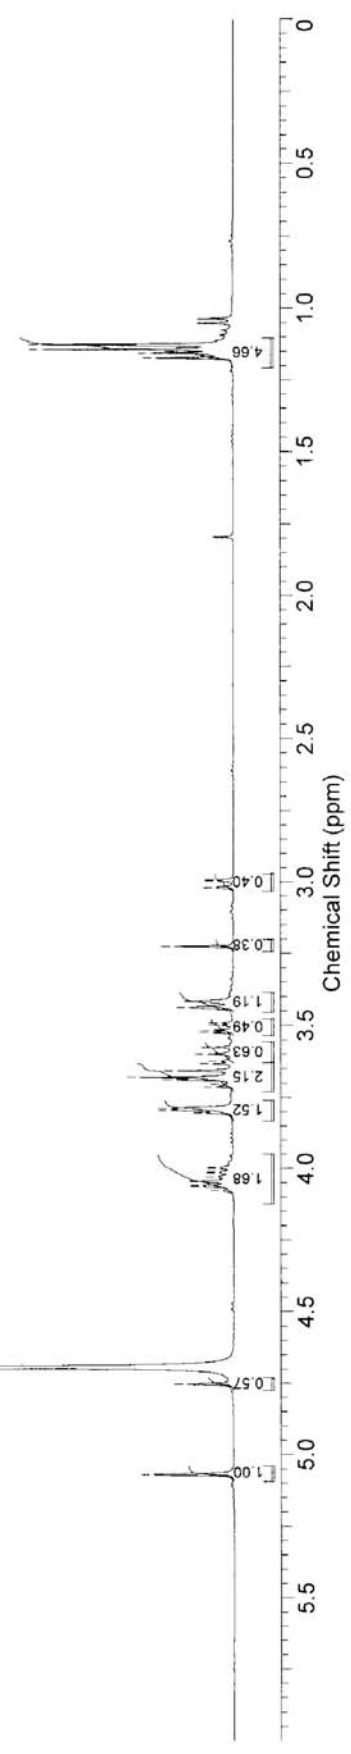



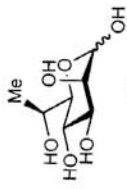

10

6-Methyl monomer C. esp

94.5  
94.3

78.3

74.5  
73.7  
71.6  
71.0  
67.2  
66.9  
65.0  
64.9

19.2  
19.1

Frequency (MHz) 100.63  
 Nucleus 13C  
 Number of Transients 256  
 Origin av400  
 Pulse Sequence zpgg30  
 Receiver Gain 32768.00  
 SW(cyclical) (Hz) 26178.01  
 Solvent DEUTERIUM  
 Spectrum Offset (Hz) OXIDE  
 10063.05  
 Sweep Width (Hz) 66  
 26177.21  
 Temperature (degree C) 27.000

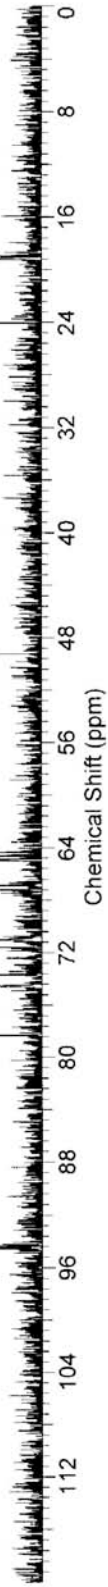

Frequency (MHz) 400.20  
 Nucleus <sup>1</sup>H  
 Number of Transients 16  
 Origin av400  
 Pulse Sequence zg60  
 Receiver Gain 90.50  
 SW(cyclical) (Hz) 8278.15  
 Solvent DEUTERIUM  
 OXIDE  
 Spectrum Offset (Hz) 2471.3989  
 Sweep Width (Hz) 8277.89  
 Temperature (degree C) 27.000

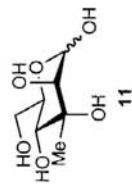

kjd14-52 H.esp  
 5.05  
 4.94  
 4.93  
 4.69  
 4.64  
 3.89  
 3.82  
 3.77  
 3.76  
 3.73  
 3.72  
 3.66  
 3.65  
 3.60  
 3.58  
 3.55  
 3.55  
 3.50  
 3.45  
 3.43  
 3.36  
 3.34

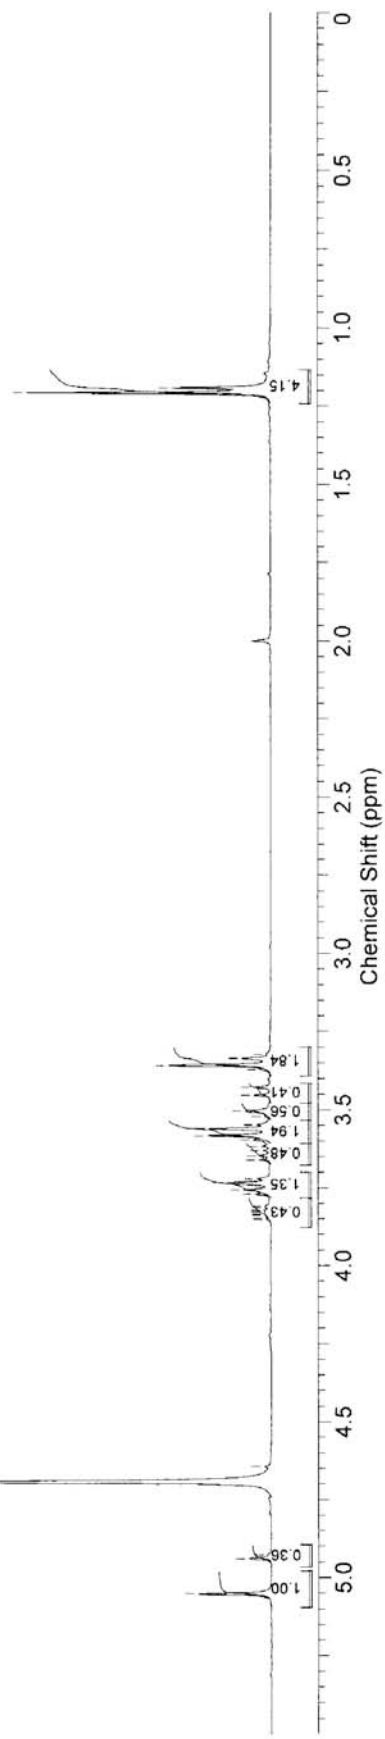

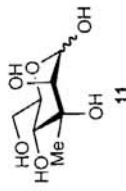

11

kjd14-52 C.esp

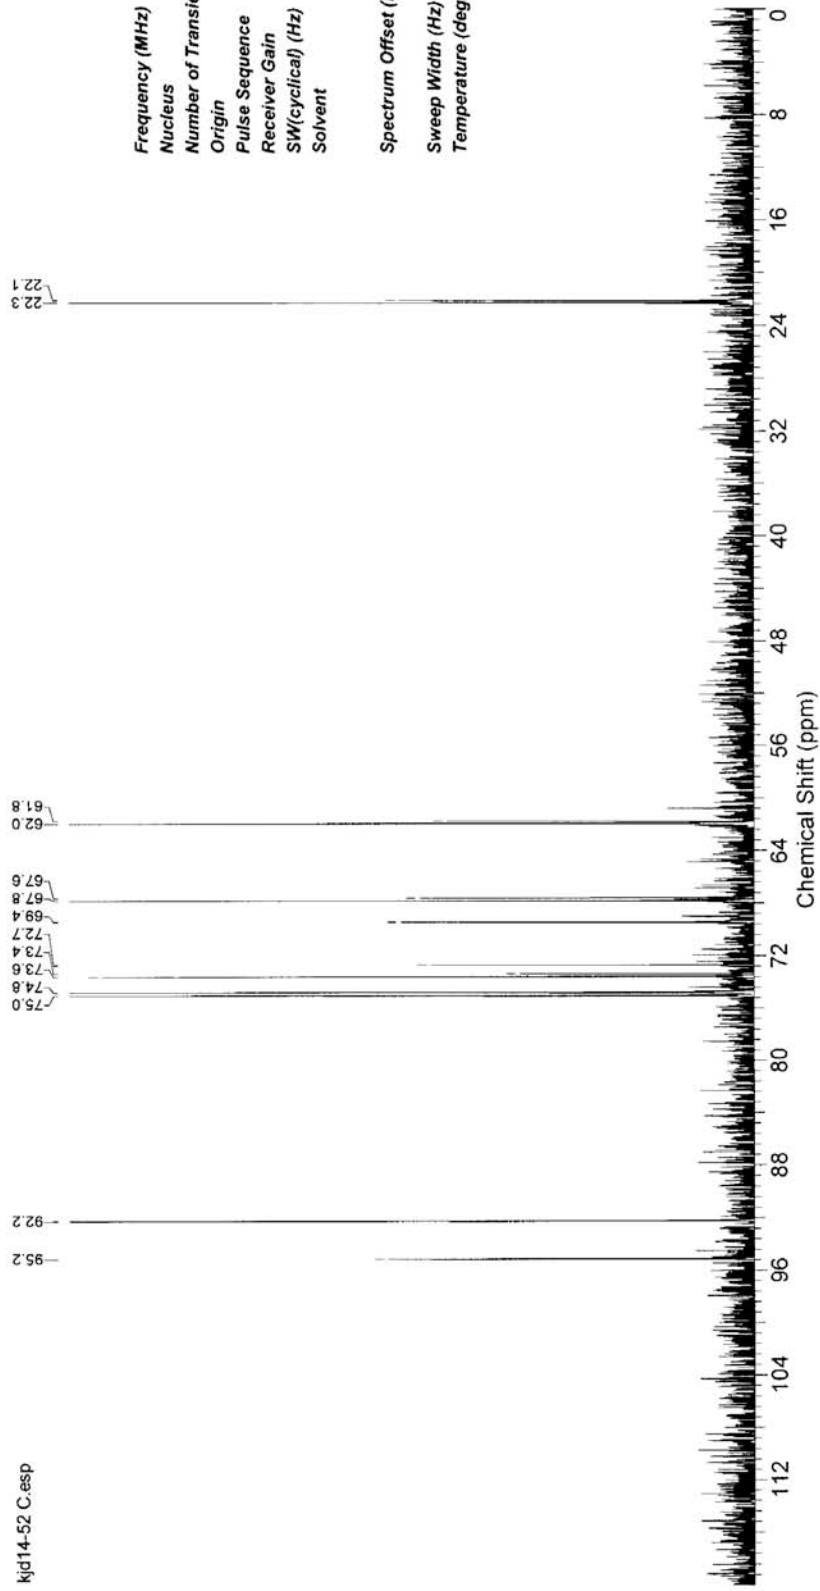

Frequency (MHz) 100.63  
 Nucleus 13C  
 Number of Transients 256  
 Origin av400  
 Pulse Sequence zgpg30  
 Receiver Gain 32768.00  
 SW(cyclical) (Hz) 26178.01  
 Solvent DEUTERIUM  
 Spectrum Offset (Hz) 10063.05  
 Sweep Width (Hz) 66  
 Temperature (degree C) 27.000

Frequency (MHz) 400.20  
 Nucleus 1H  
 Number of Transients 16  
 Origin av400  
 Pulse Sequence zg60  
 Receiver Gain 90.50  
 SW(cyclical) (Hz) 8278.15  
 Solvent CHLOROFORM-d  
 Spectrum Offset (Hz) 2468.5974  
 Sweep Width (Hz) 8277.89  
 Temperature (degree C) 23.300

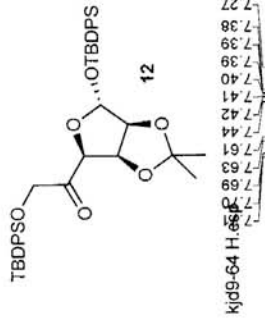

kj09-64 H-82  
 7.70  
7.69  
7.63  
7.61  
7.44  
7.42  
7.41  
7.40  
7.39  
7.39  
7.38  
7.27

5.47  
5.29  
5.28  
5.27  
5.26  
5.04  
5.03  
4.68  
4.66  
4.45  
4.41  
4.41  
4.40  
4.35

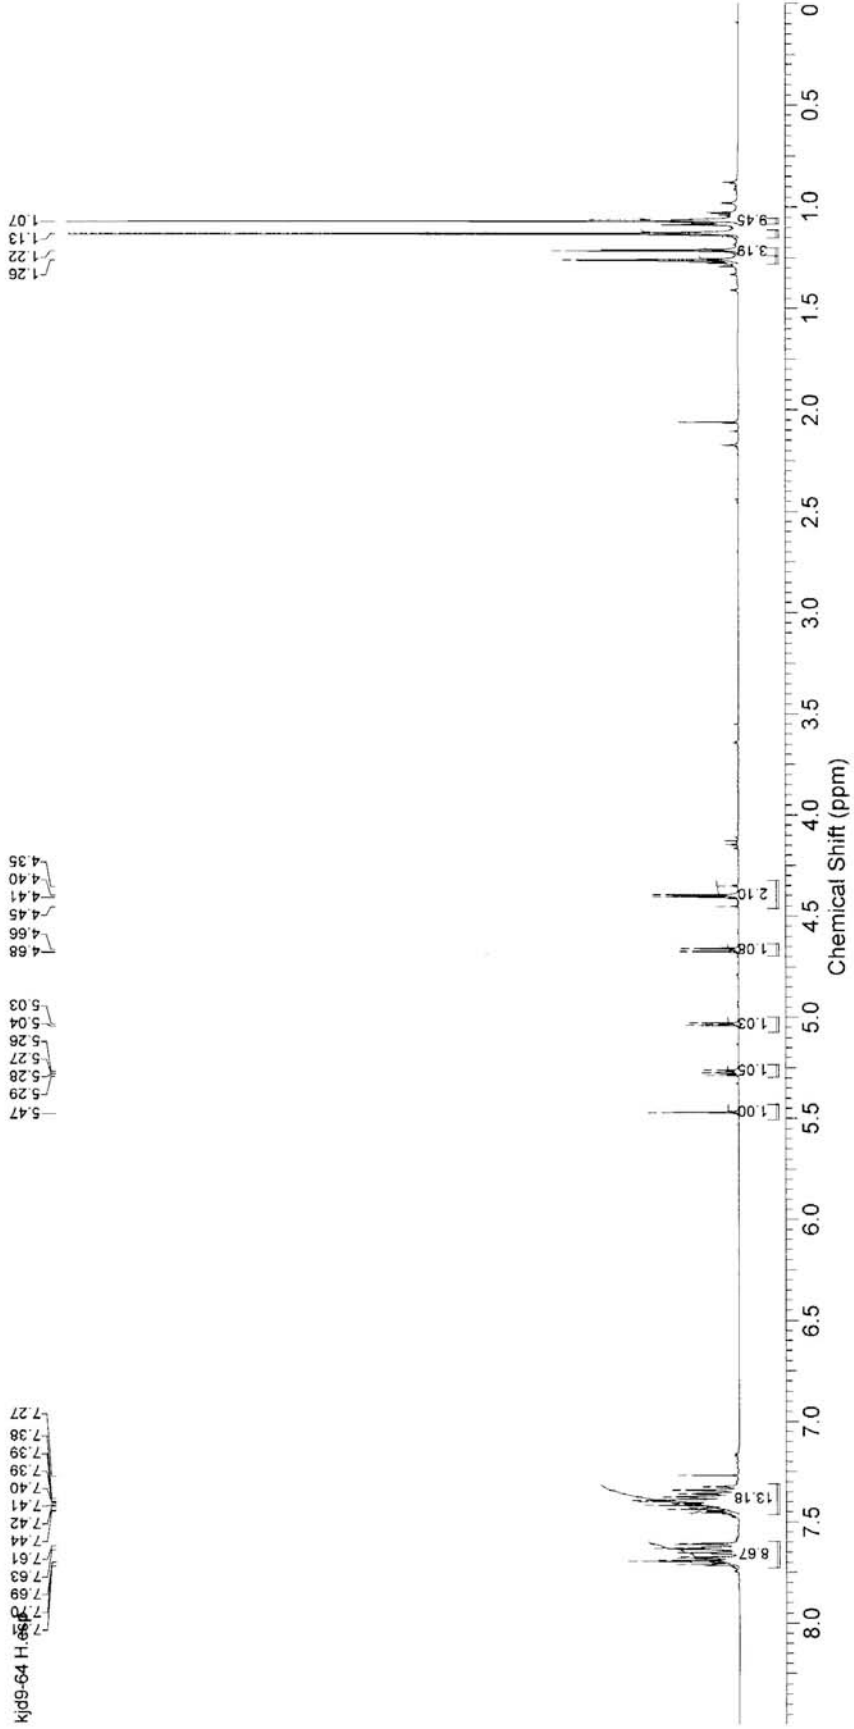

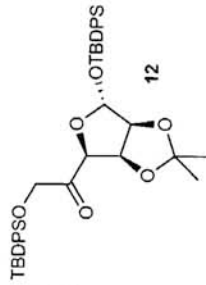

May31-2016-6\_004001r

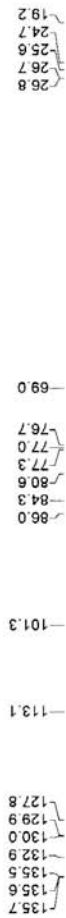

Frequency (MHz) 100.63  
 Nucleus <sup>13</sup>C  
 Number of Transients 256  
 Origin av400  
 Pulse Sequence zgpg30  
 Receiver Gain 32768.00  
 SW(cyclical) (Hz) 26178.01  
 Solvent CHLORO  
 FORM-d  
 Spectrum Offset (Hz) 10021.29  
 39  
 Sweep Width (Hz) 26177.21  
 Temperature (degree C) 23.300

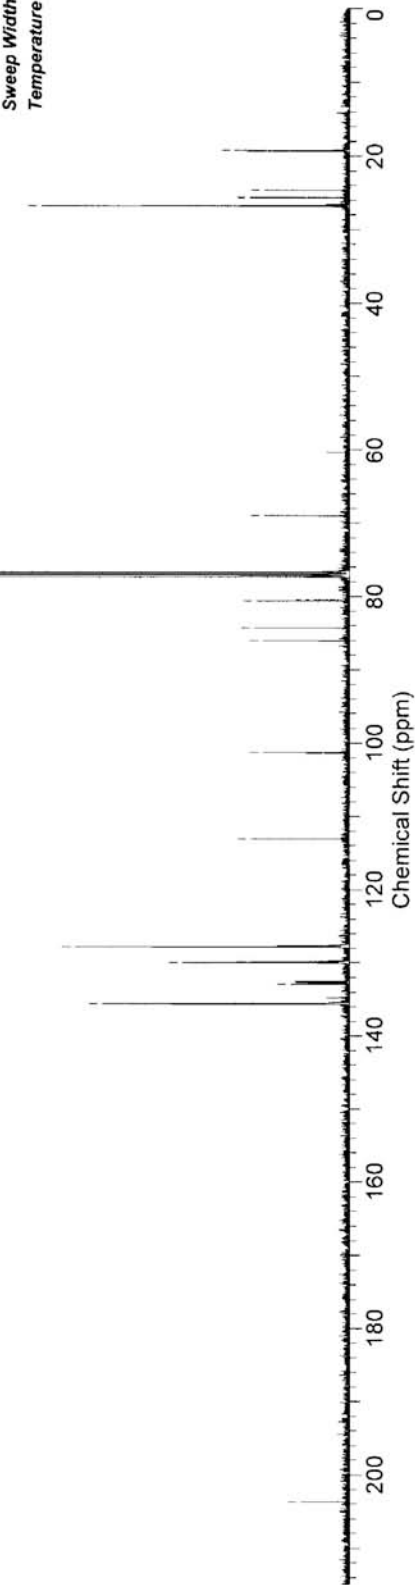

Frequency (MHz) 500.30  
 Nucleus <sup>1</sup>H  
 Number of Transients 16  
 Origin avc500  
 Pulse Sequence zg30  
 Receiver Gain 4.00  
 SW(cyclical) (Hz) 10330.58  
 Solvent CHLOROFORM-d  
 Spectrum Offset (Hz) 3065.5417  
 Sweep Width (Hz) 10330.26  
 Temperature (degree C) 27.000

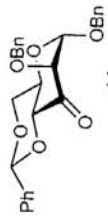

kjd15-69 H.esp

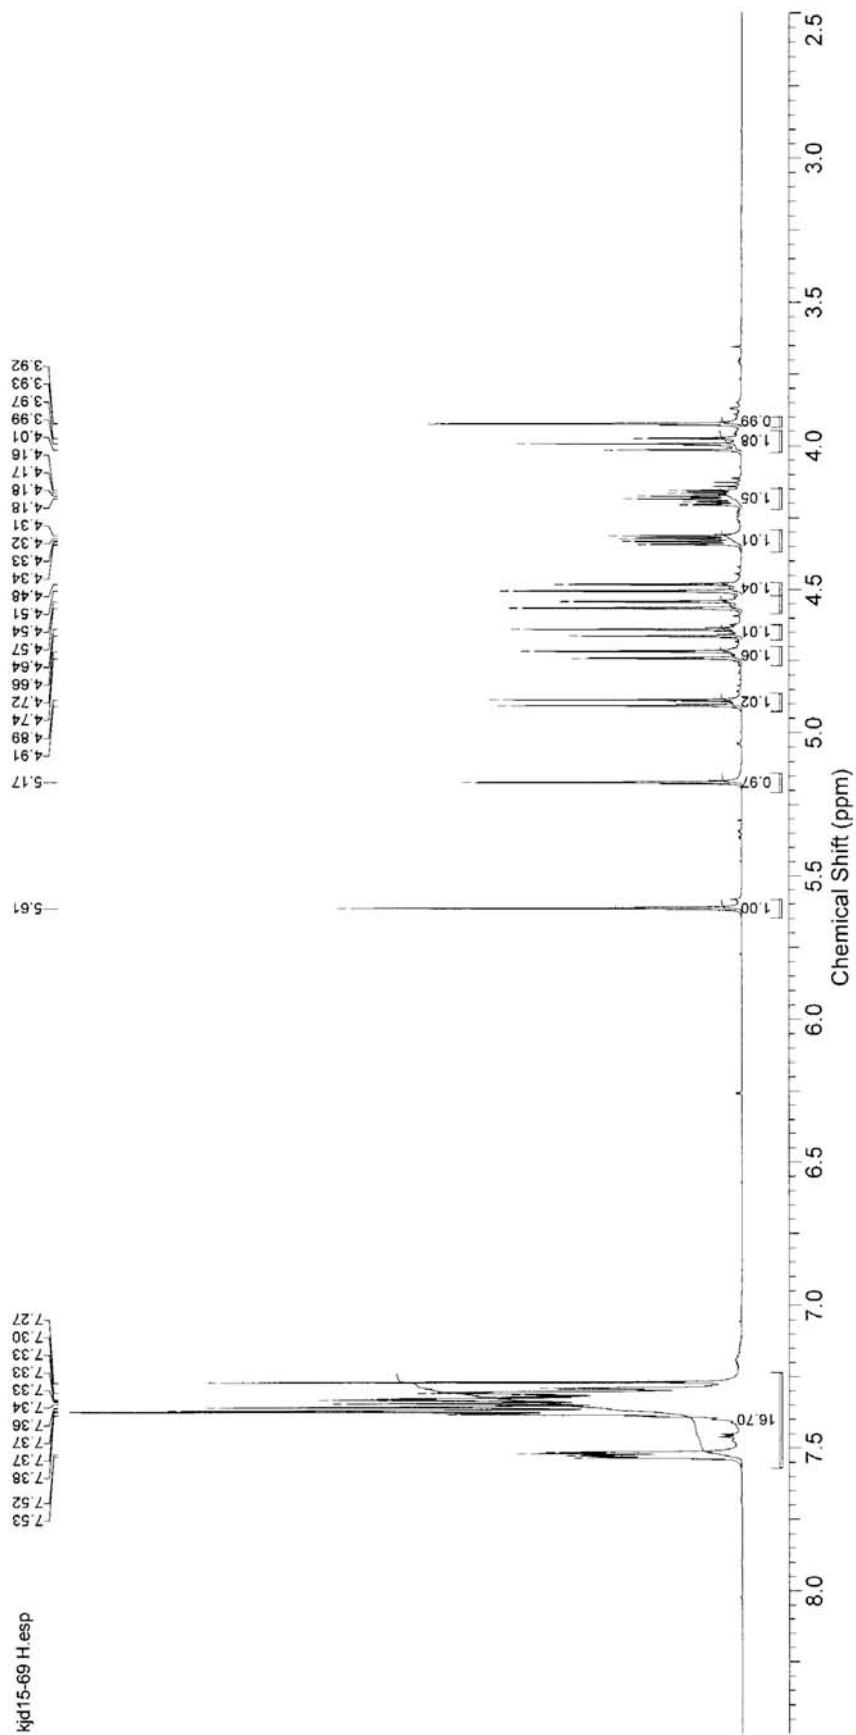

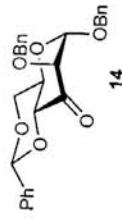

kjd15-69 C.esp

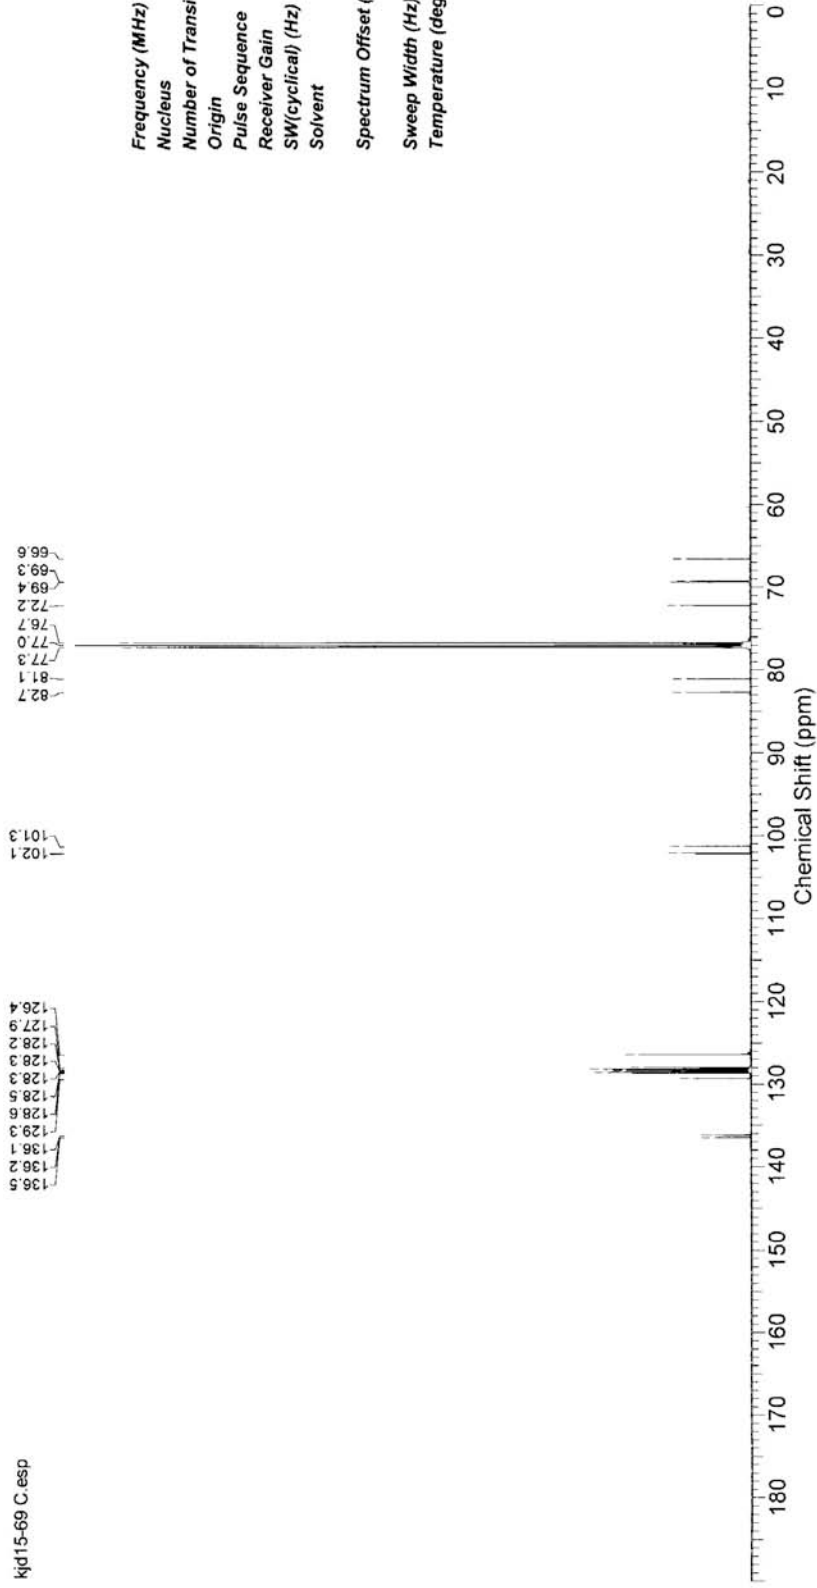

Frequency (MHz) 125.80  
 Nucleus <sup>13</sup>C  
 Number of Transients 256  
 Origin avc500  
 Pulse Sequence zgpg30  
 Receiver Gain 1820.00  
 SW(cyclical) (Hz) 31250.00  
 Solvent CHLORO  
 FORM-d  
 Spectrum Offset (Hz) 12571.30  
 47  
 Sweep Width (Hz) 31249.05  
 Temperature (degree C) 27.000

Frequency (MHz) 400.13  
 Nucleus 1H  
 Number of Transients 16  
 Origin dpx400  
 Pulse Sequence zg60  
 Receiver Gain 32.00  
 SW(cyclical) (Hz) 5592.84  
 Solvent CHLOROFORM-d  
 Spectrum Offset (Hz) 1983.0321  
 Sweep Width (Hz) 5592.67  
 Temperature (degree C) 27.000

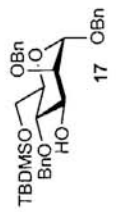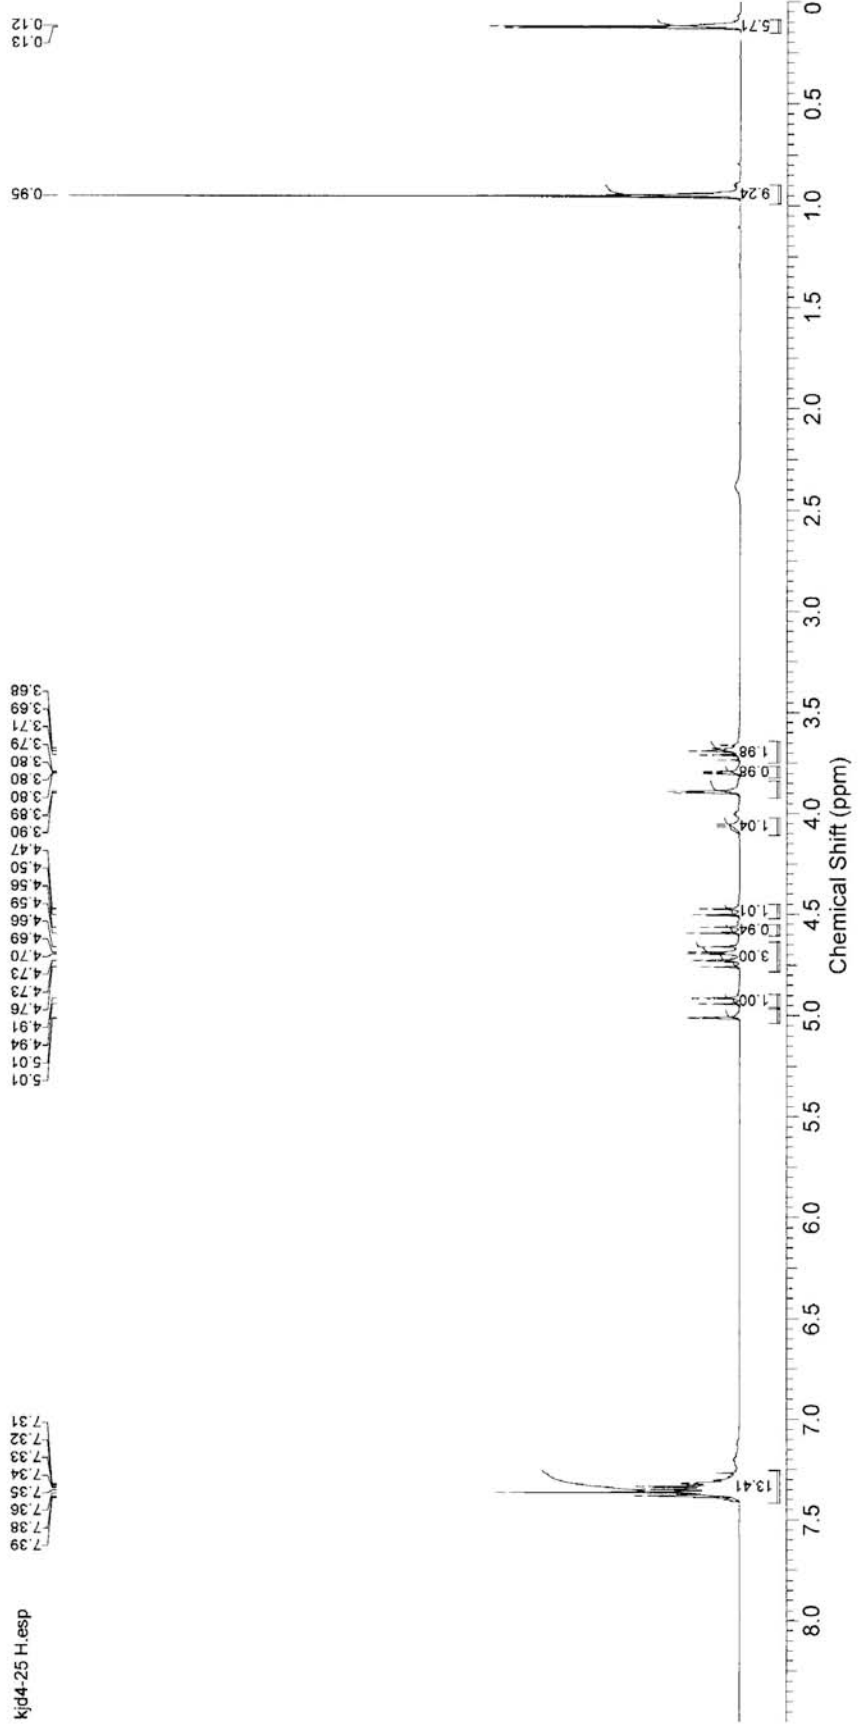

5.01  
4.94  
4.91  
4.76  
4.73  
4.73  
4.73  
4.70  
4.69  
4.66  
4.59  
4.56  
4.50  
4.47  
3.90  
3.89  
3.80  
3.80  
3.80  
3.79  
3.71  
3.69  
3.68

7.39  
7.38  
7.36  
7.35  
7.34  
7.33  
7.32  
7.31



Frequency (MHz) 500.30  
 Nucleus 1H  
 Number of Transients 16  
 Origin avc500  
 Pulse Sequence zg30  
 Receiver Gain 6.35  
 SW(cyclical) (Hz) 10330.58  
 Solvent CHLOROFORM-d  
 Spectrum Offset (Hz) 3089.5557  
 Sweep Width (Hz) 10330.26  
 Temperature (degree C) 24.546

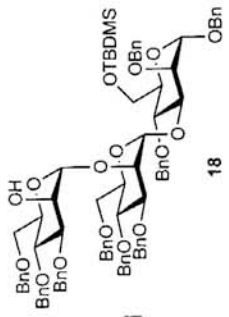

kjd4-66 H.resp  
 7.37  
7.36  
7.35  
7.34  
7.33  
7.31  
7.30  
7.29  
7.27

5.30  
5.18  
4.95  
4.93  
4.79  
4.69  
4.67  
4.63  
4.62  
4.61  
4.60  
4.59  
4.58  
4.57  
4.50  
4.16  
4.03  
3.99  
3.95  
3.94  
3.93  
3.72  
3.70  
3.68  
3.54  
3.52

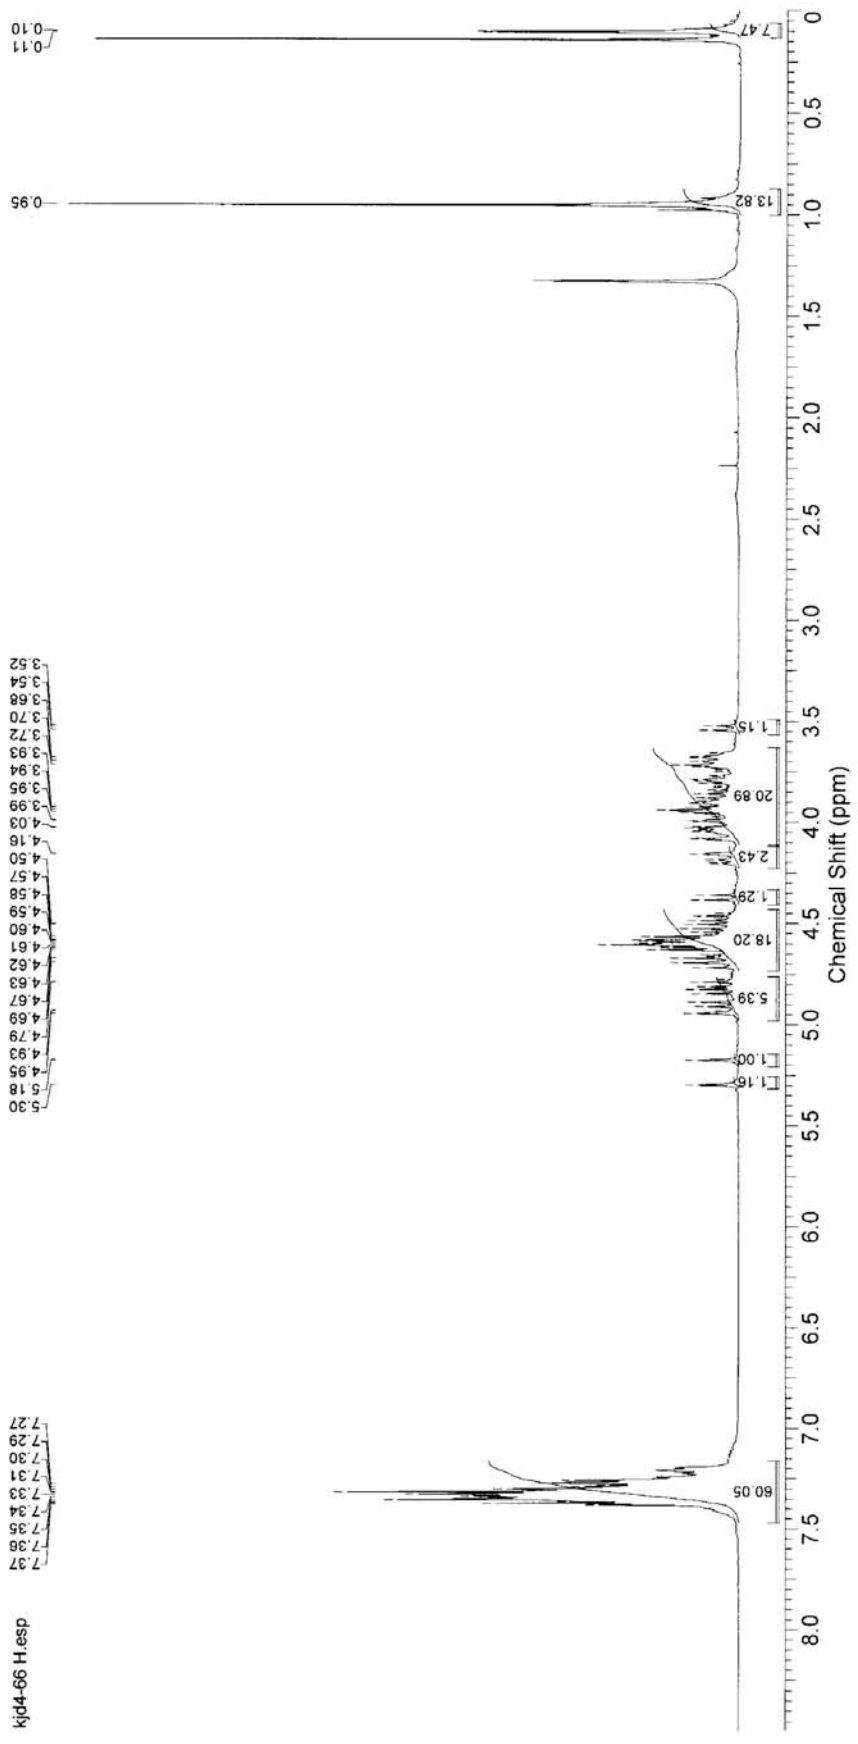

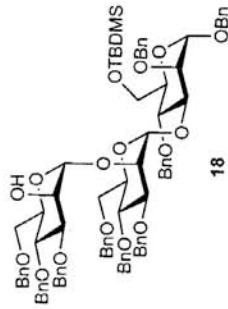

kd20320804\_002001r

138.7  
138.6  
138.4  
138.3  
138.1  
129.9  
128.4  
128.4  
128.2  
127.9  
127.8  
127.7  
127.6  
127.4

101.0  
96.0

79.9  
77.3  
77.0  
76.8  
74.9  
73.3  
73.3  
73.2  
72.2  
72.1  
71.6  
68.7  
62.6

31.9  
29.7  
29.4  
22.7  
18.3  
14.1  
1.0

Frequency (MHz) 125.80  
Nucleus <sup>13</sup>C  
Number of Transients 512  
Origin avc500  
Pulse Sequence zpgpg30  
Receiver Gain 1820.00  
SW(cyclical) (Hz) 31250.00  
Solvent CHLORO  
FORM-d  
Spectrum Offset (Hz) 12571.30  
47  
Sweep Width (Hz) 31249.05  
Temperature (degree C) 24.546

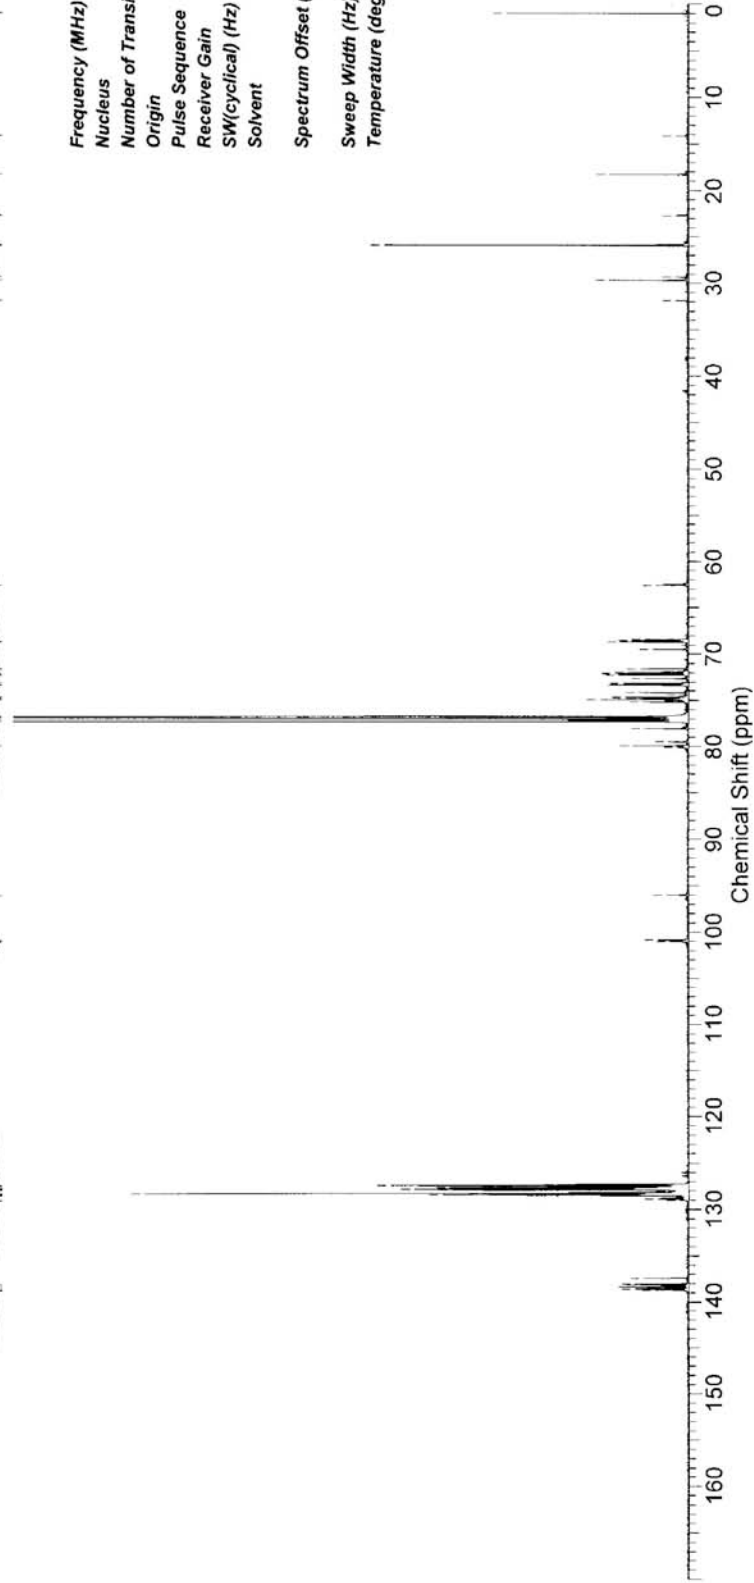

Frequency (MHz) 400.20  
 Nucleus 1H  
 Number of Transients 16  
 Origin av400  
 Pulse Sequence zg60  
 Receiver Gain 35.90  
 SW(cyclical) (Hz) 8278.15  
 Solvent CHLOROFORM-d  
 Spectrum Offset (Hz) 2468.5974  
 Sweep Width (Hz) 8277.89  
 Temperature (degree C) 27.000

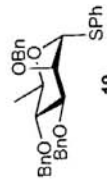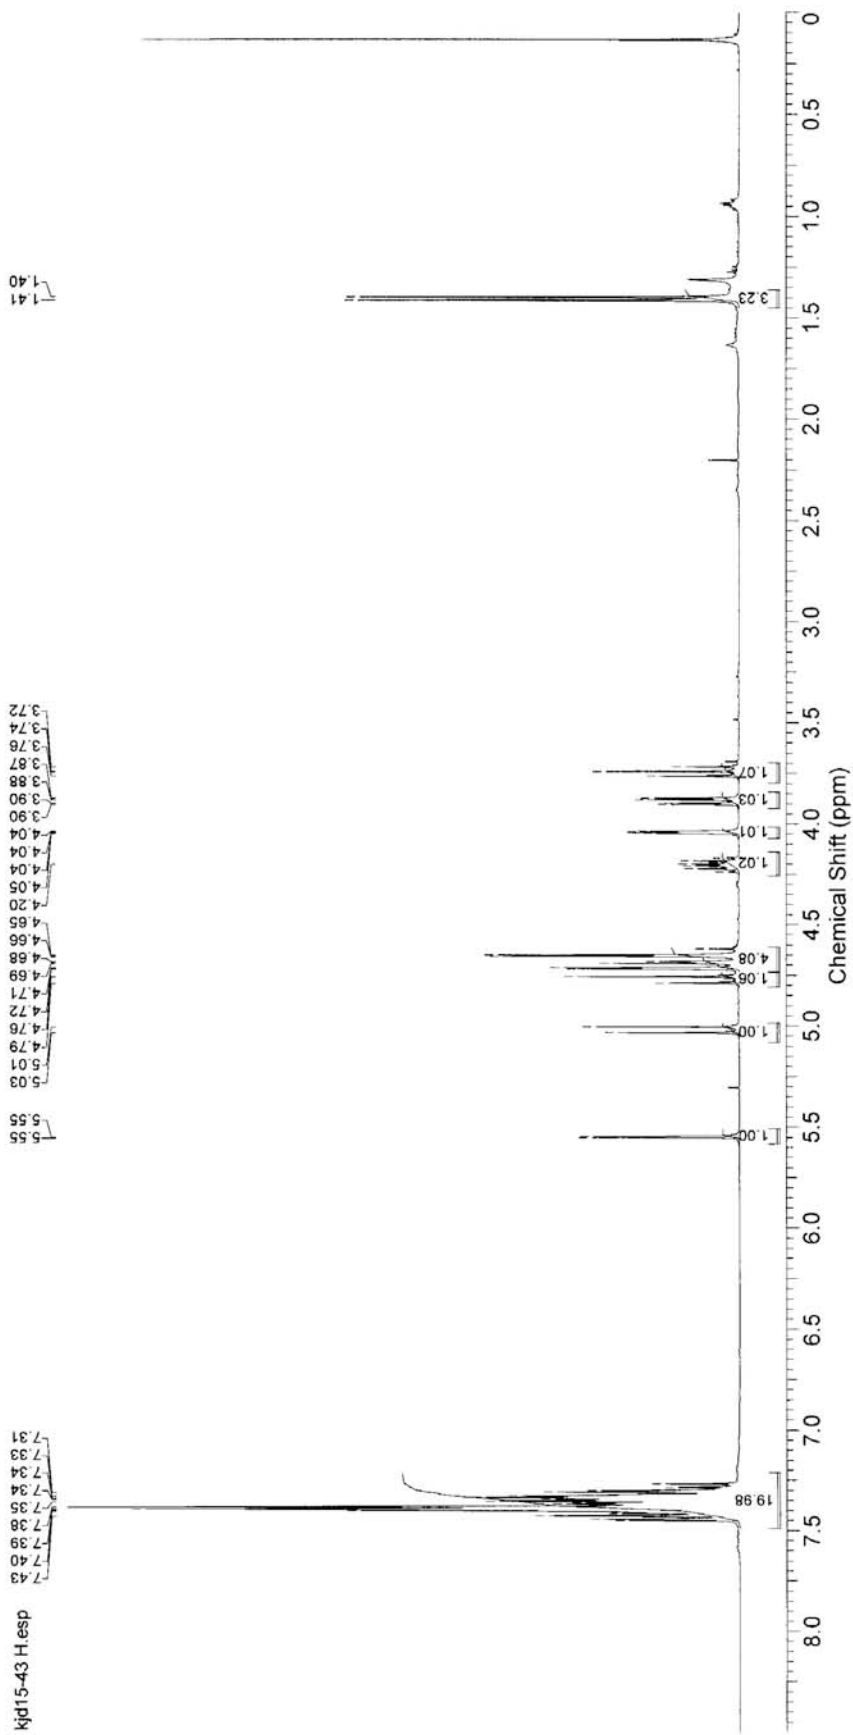

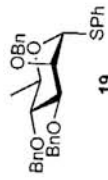

kjd15-43 C.esp

138.6  
138.3  
137.9  
134.7  
131.3  
129.1  
128.4  
128.1  
127.9  
127.8  
127.7

85.8  
80.5  
80.1  
77.4  
77.1  
76.8  
76.5  
75.5  
72.2  
69.4

Frequency (MHz) 100.63  
Nucleus <sup>13</sup>C  
Number of Transients 256  
Origin av400  
Pulse Sequence zgpg30  
Receiver Gain 32768.00  
SW(cyclical) (Hz) 26178.01  
Solvent CHLORO  
FORM-d  
Spectrum Offset (Hz) 10021.29  
39  
Sweep Width (Hz) 26177.21  
Temperature (degree C) 27.000

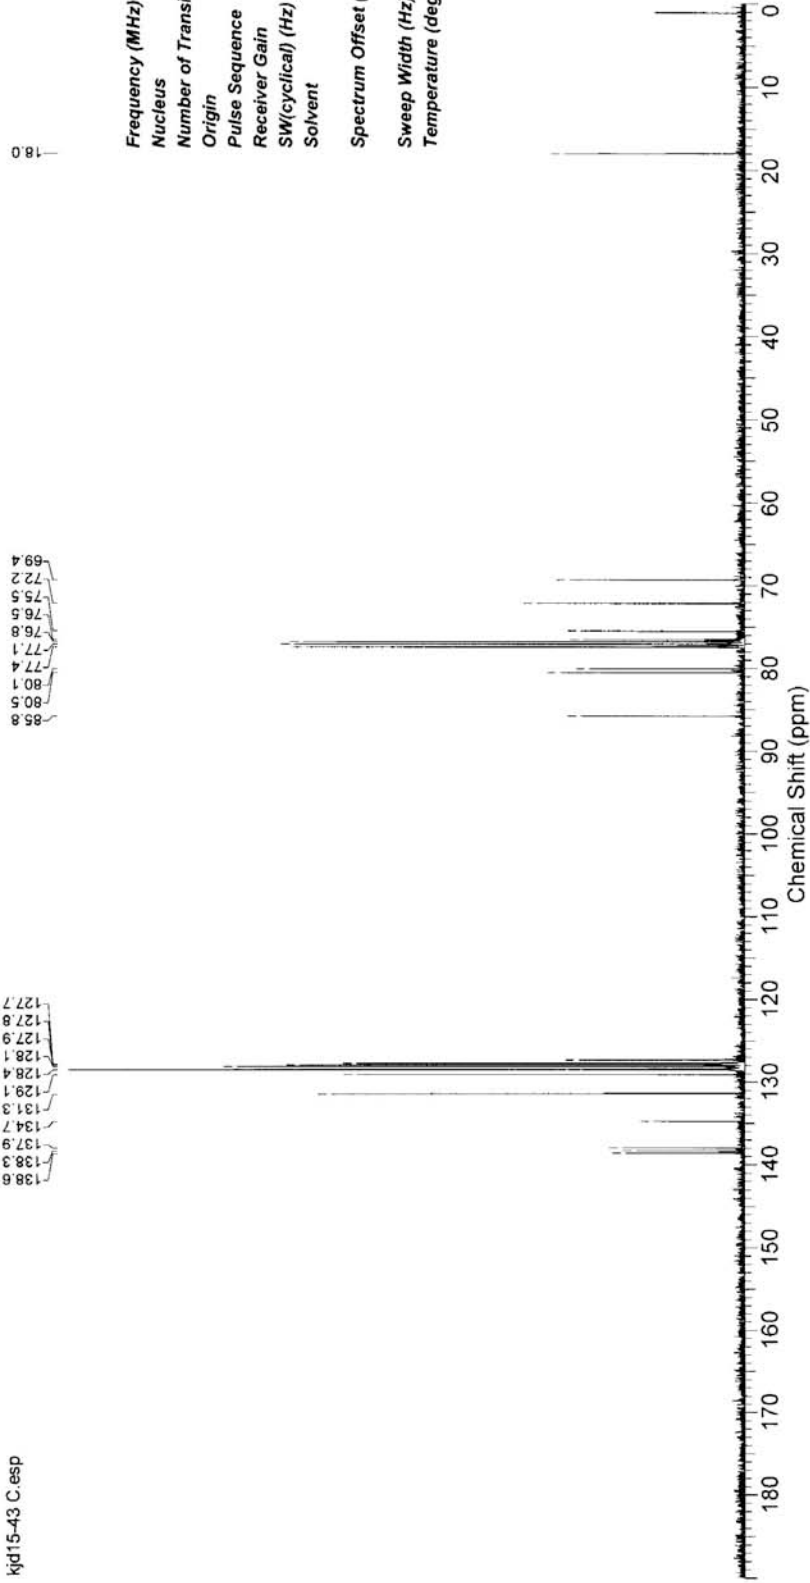

Frequency (MHz) 400.20  
 Nucleus 1H  
 Number of Transients 16  
 Origin av400  
 Pulse Sequence zg60  
 Receiver Gain 90.50  
 SW(cyclical) (Hz) 8278.15  
 Solvent CHLOROFORM-d  
 Spectrum Offset (Hz) 2468.5974  
 Sweep Width (Hz) 8277.89  
 Temperature (degree C) 22.700

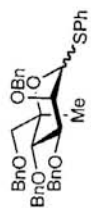

20a

kjd 12.50 H.tesp

5.51  
 5.50  
 5.09  
 5.04  
 4.90  
 4.88  
 4.77  
 4.75  
 4.74  
 4.64  
 4.63  
 4.61  
 4.59  
 4.56  
 4.53  
 4.50  
 4.48  
 4.45  
 4.27  
 4.25  
 4.07  
 4.05  
 3.99  
 3.90  
 3.74  
 3.71  
 3.67  
 3.63  
 3.59  
 3.56

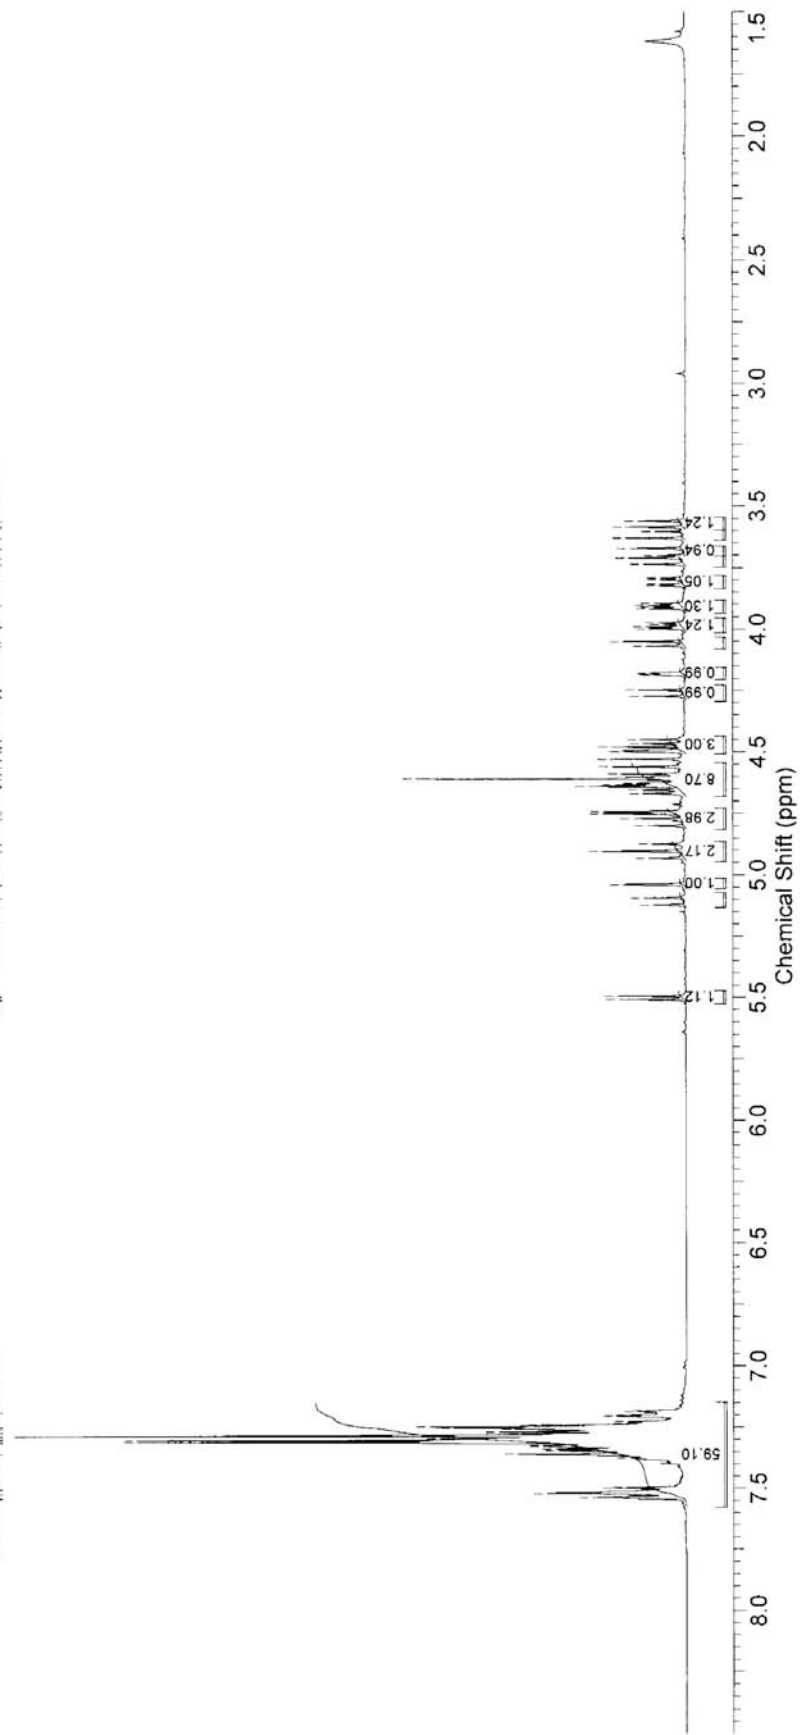

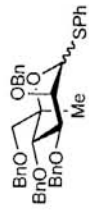

20a

kjd 12-50 C. esp

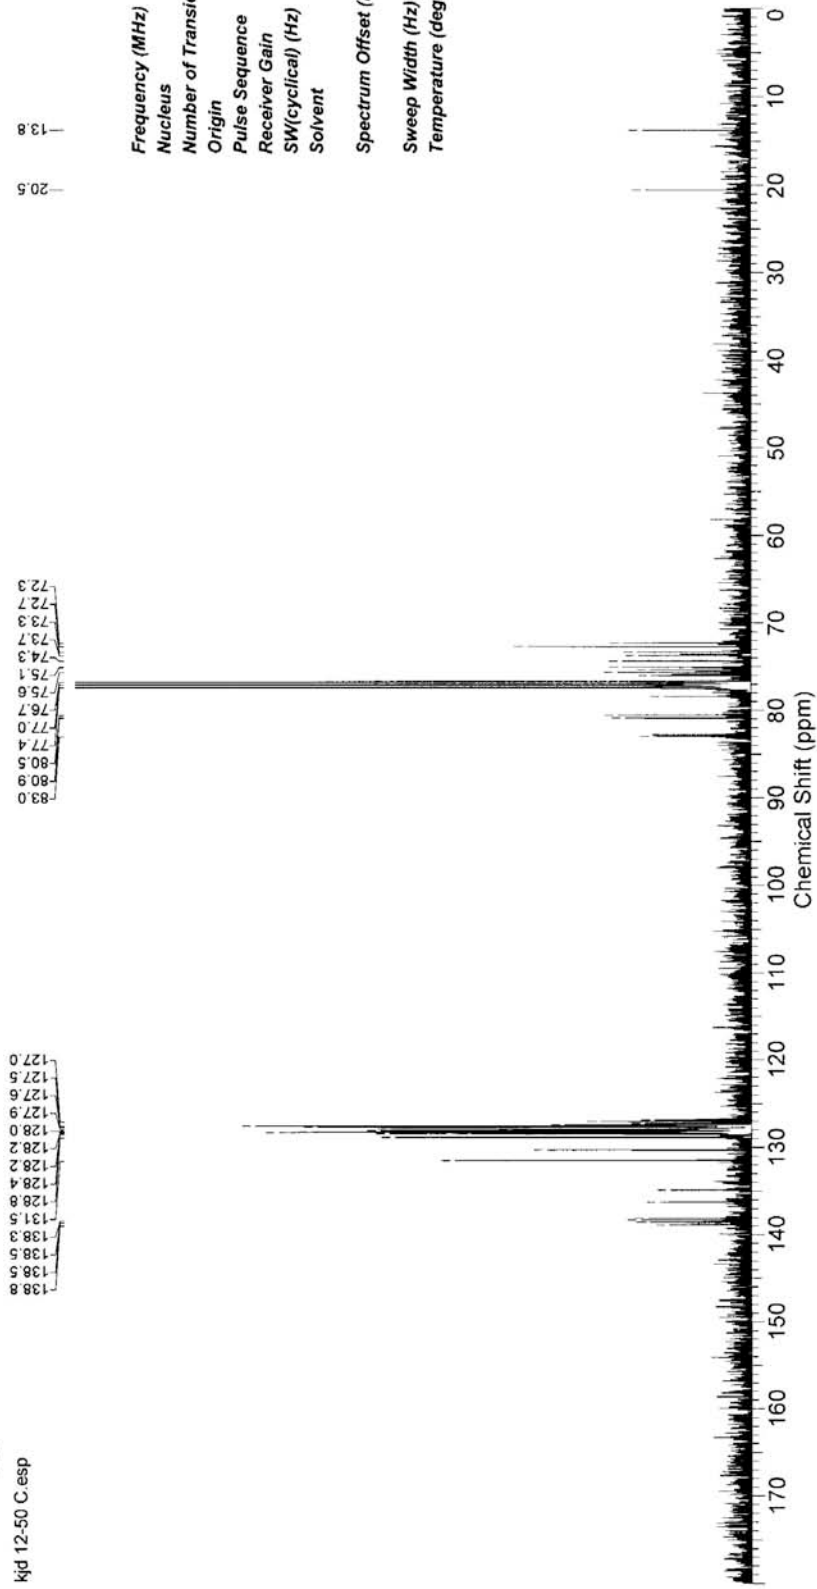

Frequency (MHz) 100.63  
 Nucleus 13C  
 Number of Transients 256  
 Origin av400  
 Pulse Sequence zgpg30  
 Receiver Gain 32768.00  
 SW(cyclical) (Hz) 26178.01  
 Solvent CHLORO  
 FORM-d  
 Spectrum Offset (Hz) 10021.29  
 39  
 Sweep Width (Hz) 26177.21  
 Temperature (degree C) 23.100

Frequency (MHz) 400.20  
 Nucleus <sup>1</sup>H  
 Number of Transients 16  
 Origin av400  
 Pulse Sequence zg60  
 Receiver Gain 40.30  
 SW(cyclical) (Hz) 8278.15  
 Solvent CHLOROFORM-d  
 Spectrum Offset (Hz) 2468.6377  
 Sweep Width (Hz) 8277.89  
 Temperature (degree C) 23.100

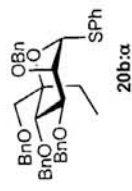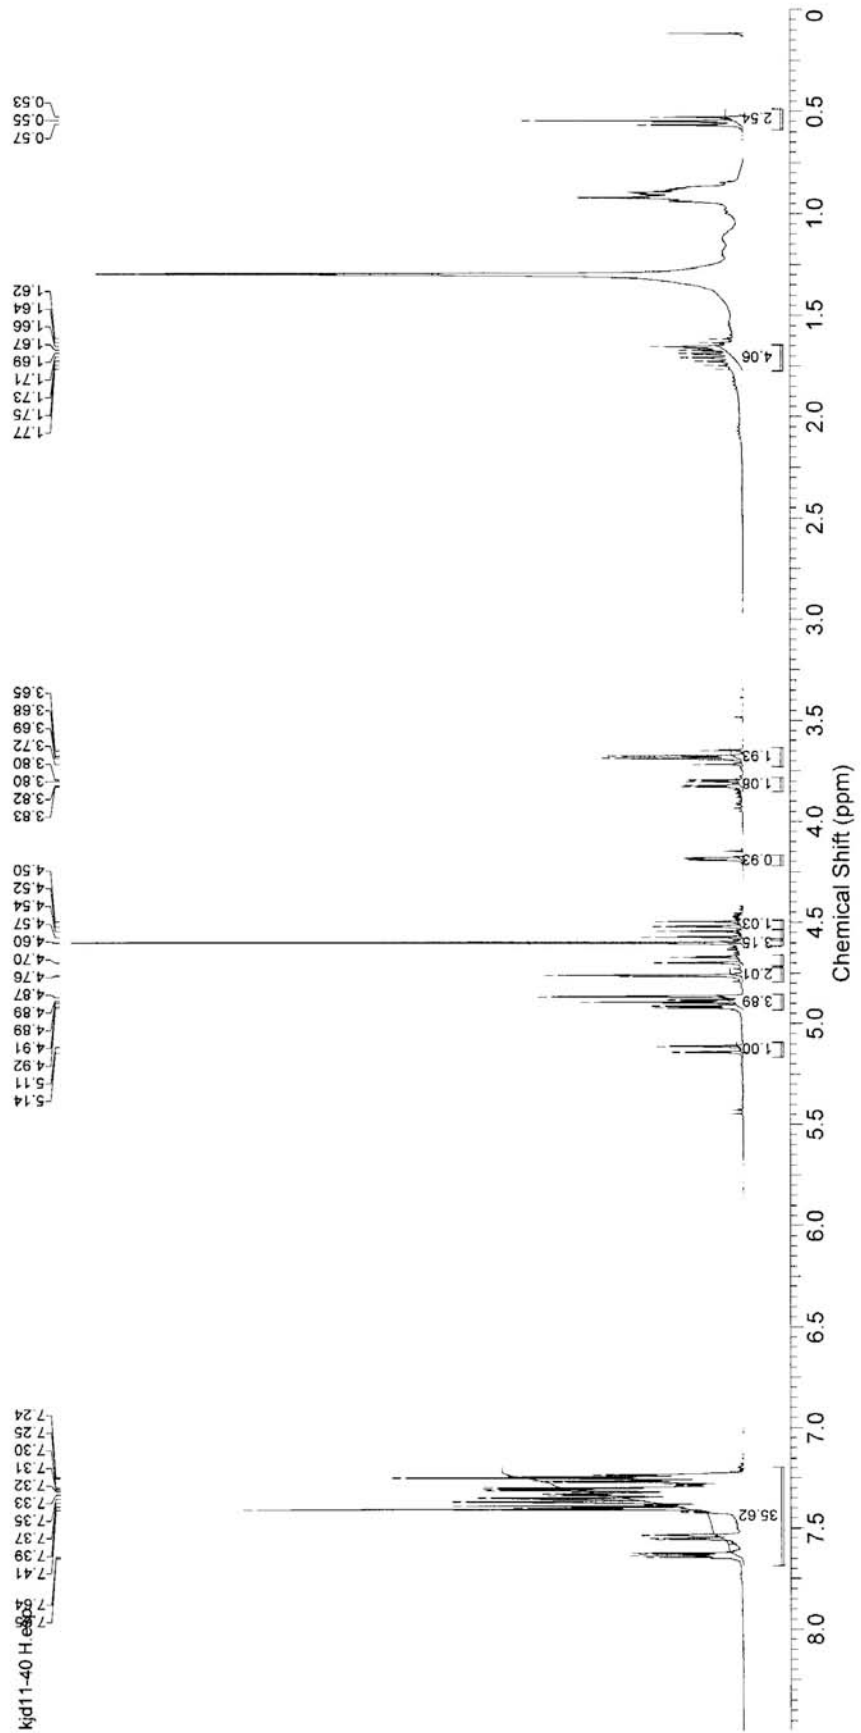

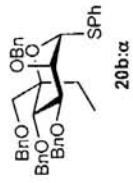

kjd11-40 C esp

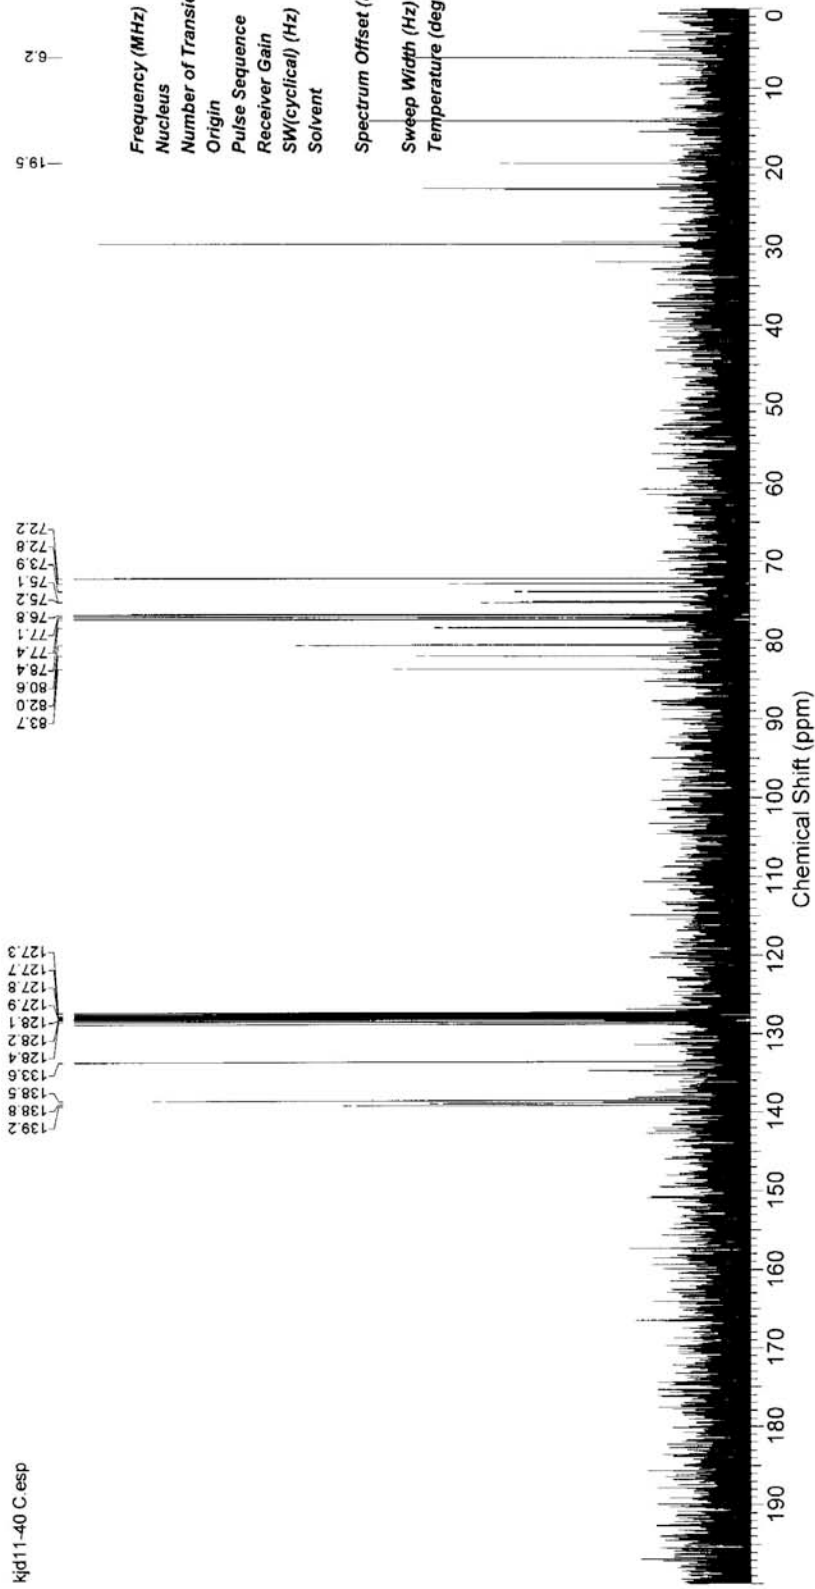



Frequency (MHz) 400.20  
 Nucleus  $^1\text{H}$   
 Number of Transients 16  
 Origin av400  
 Pulse Sequence zg60  
 Receiver Gain 40.30  
 SW(cyclical) (Hz) 8278.15  
 Solvent CHLOROFORM-d  
 Spectrum Offset (Hz) 2468.5974  
 Sweep Width (Hz) 8277.89  
 Temperature (degree C) 23.000

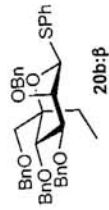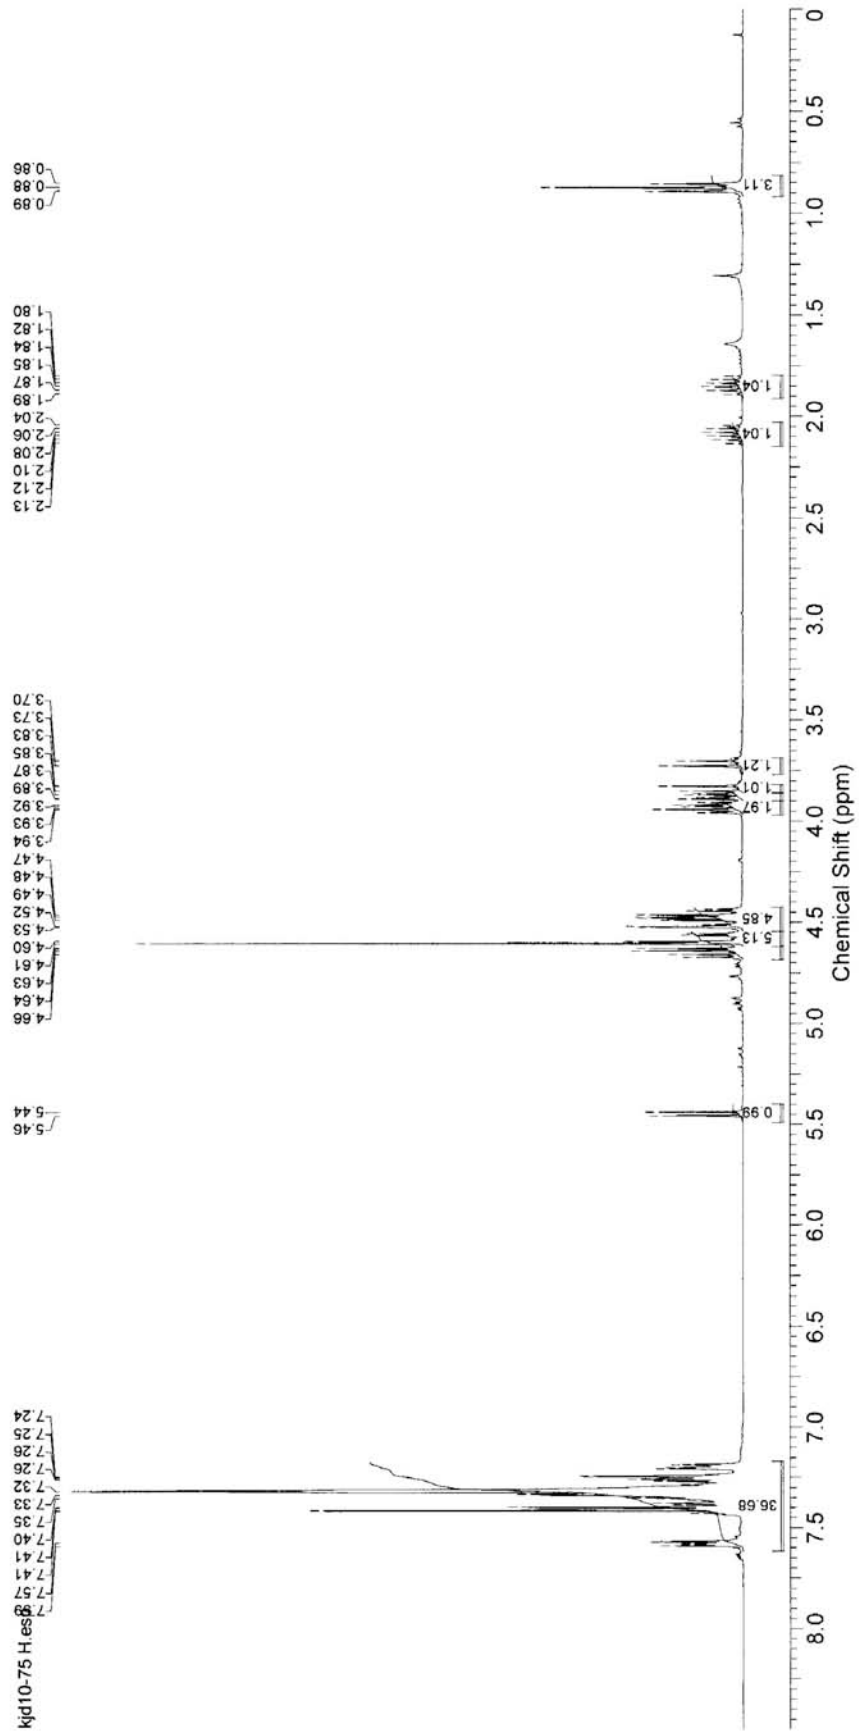

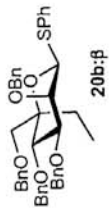

Kjd11-75 C.esp

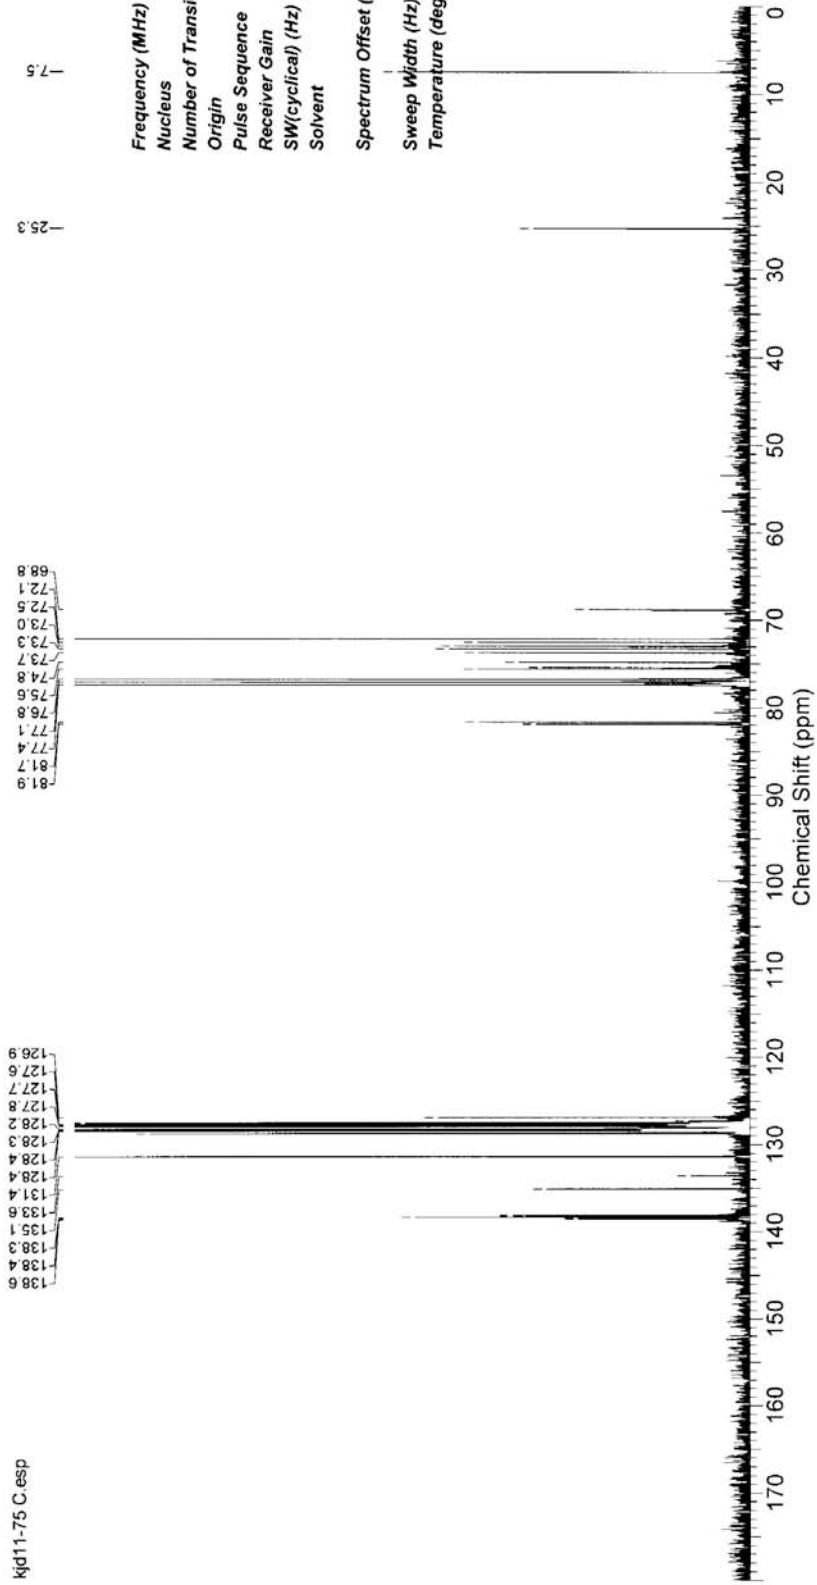

Frequency (MHz) 100.63  
 Nucleus 13C  
 Number of Transients 256  
 Origin av400  
 Pulse Sequence zgpg30  
 Receiver Gain 32768.00  
 SW(cyclical) (Hz) 26178.01  
 Solvent CHLORO  
 FORM-d  
 Spectrum Offset (Hz) 10021.29  
 39  
 Sweep Width (Hz) 26177.21  
 Temperature (degree C) 23.200



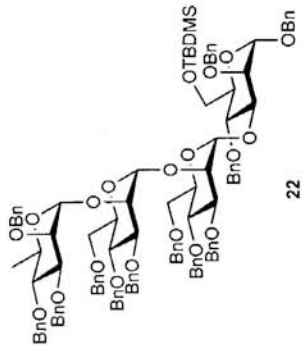

d-rham no linker HSQC. esp

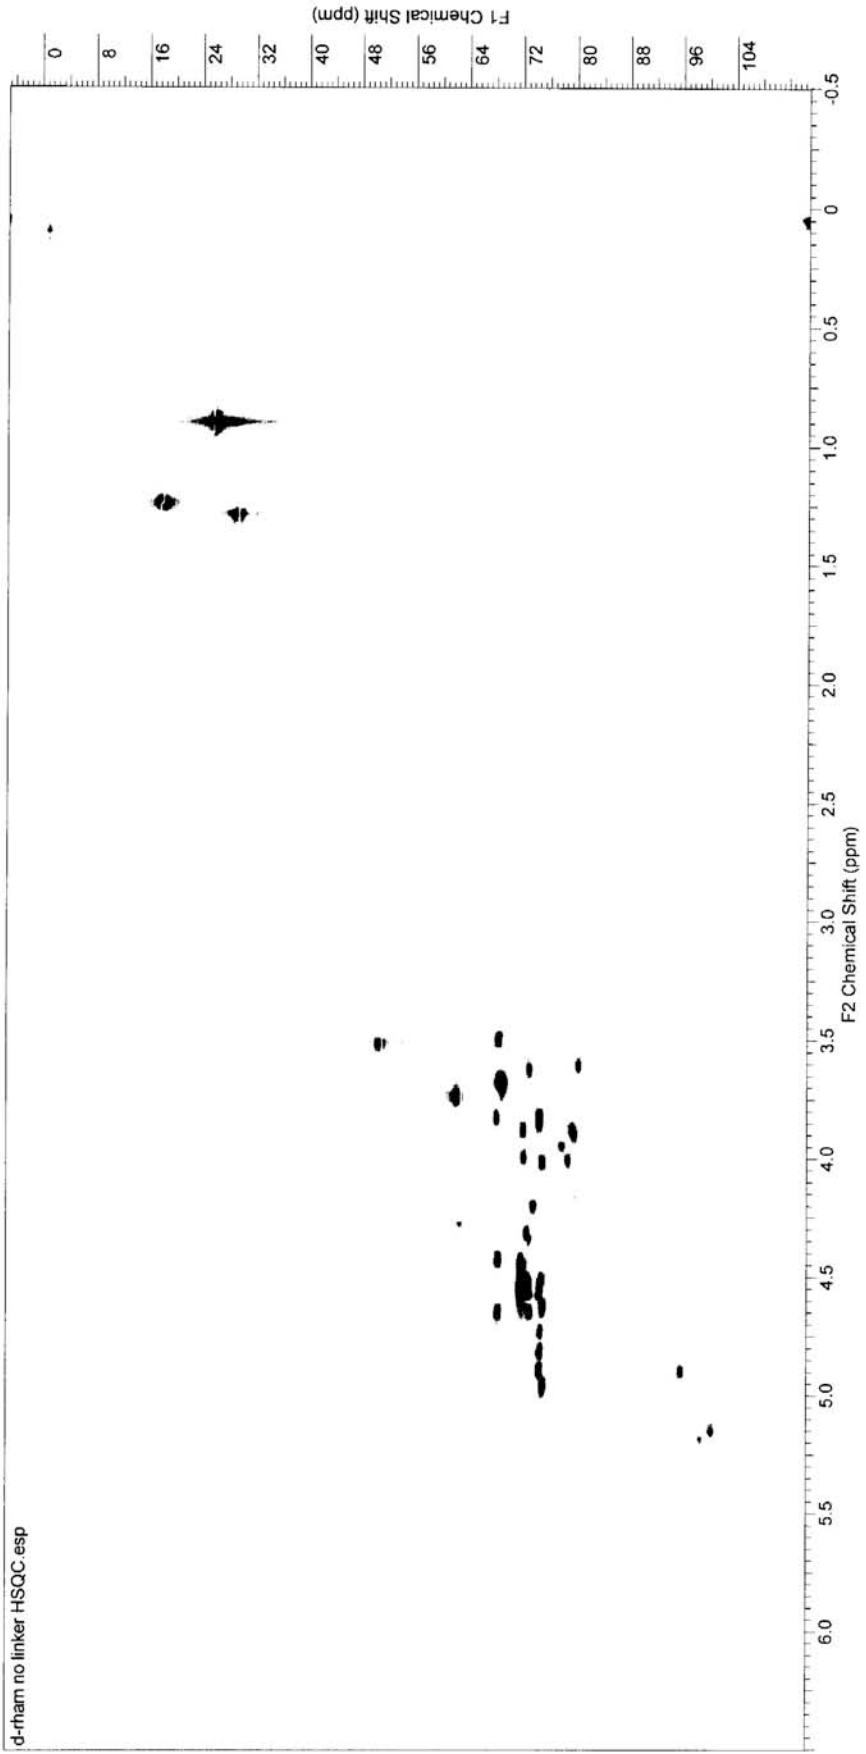



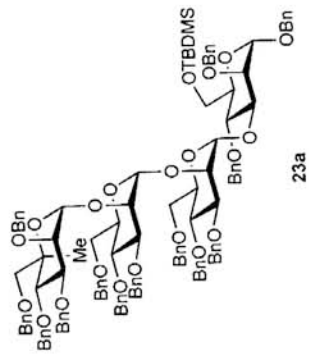

23a

C-5 methyl tetra no linker protected Hsqc esp

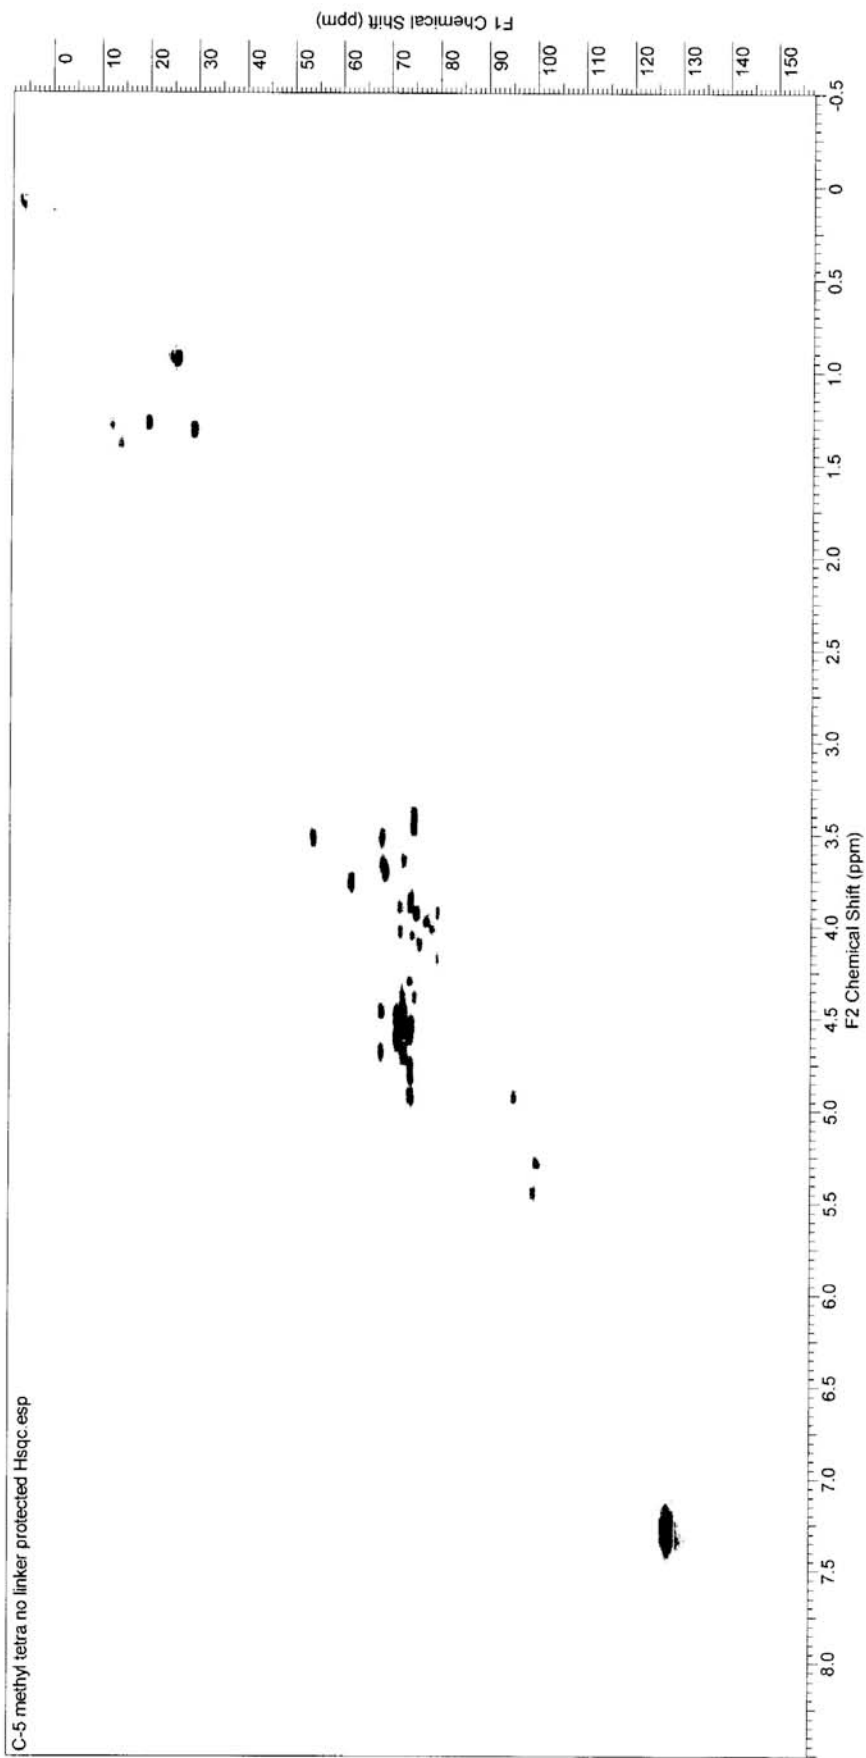

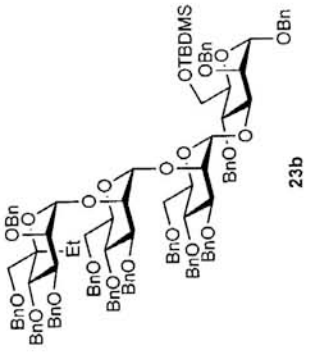

C-5  $\alpha$  ethyl tetra-protected

Frequency (MHz) 500.30  
 Nucleus  $^1\text{H}$   
 Number of Transients 16  
 Origin avc500  
 Pulse Sequence zg30  
 Receiver Gain 4.00  
 SW(cyclical) (Hz) 10330.58  
 Solvent CHLOROFORM-d  
 Spectrum Offset (Hz) 3089.5557  
 Sweep Width (Hz) 10330.26  
 Temperature (degree C) 15.536

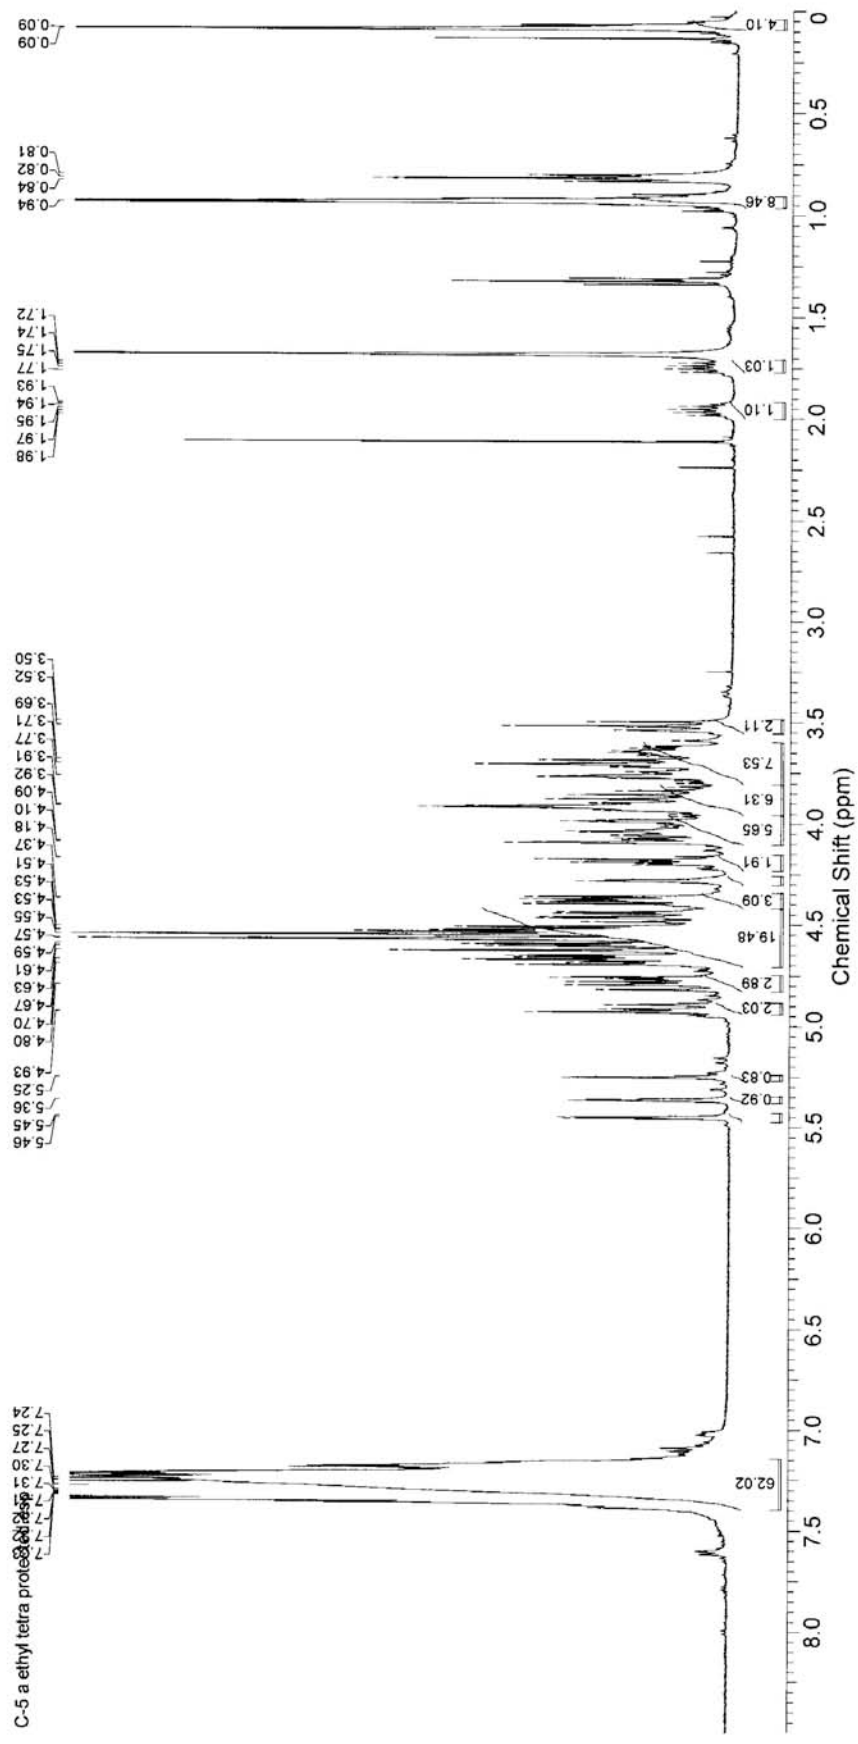





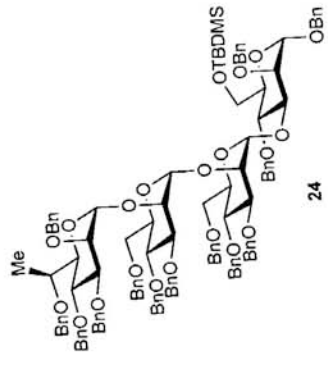

24

6-METHYL TETRA NO LINKER W/ESP

Frequency (MHz) 700.13  
 Nucleus 1H  
 Number of Transients 8  
 Origin av700  
 Pulse Sequence zgpg30  
 Receiver Gain 8.00  
 SW(cyclical) (Hz) 11160.71  
 Solvent CHLOROFORM-d  
 Spectrum Offset (Hz) 3500.6514  
 Sweep Width (Hz) 11160.54  
 Temperature (degree C) 25.000

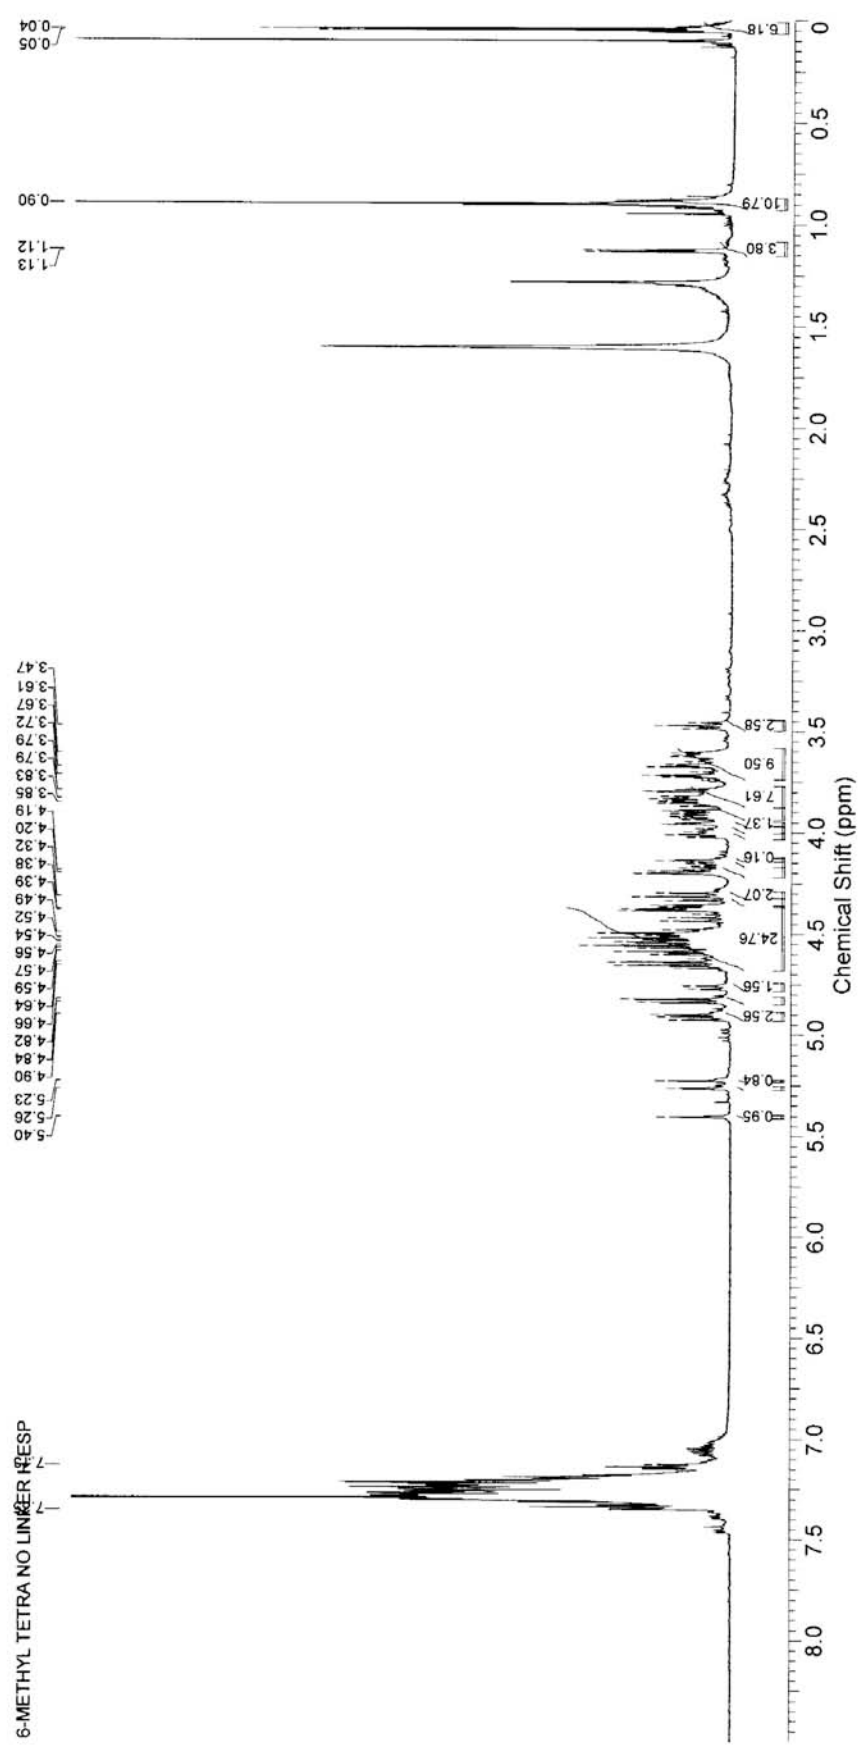

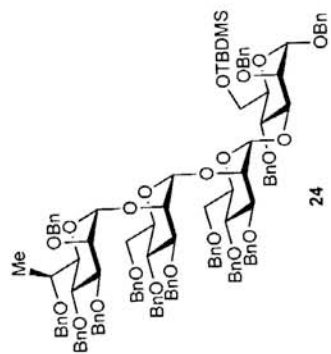

24

6-METHYL TETRA NO LINKER C.ESP

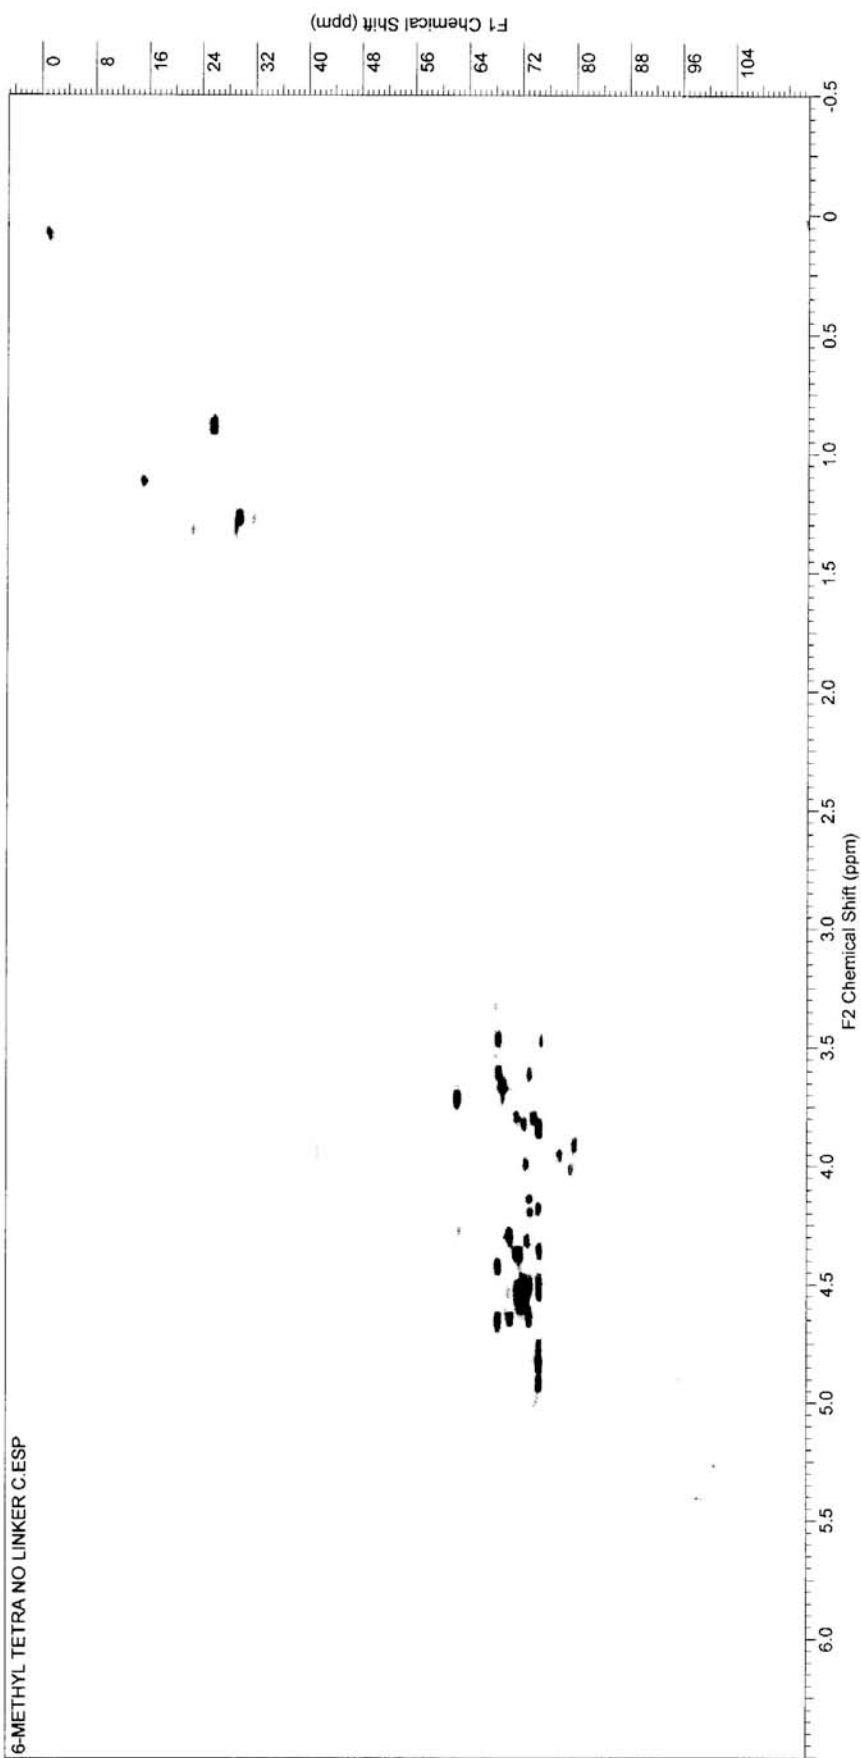

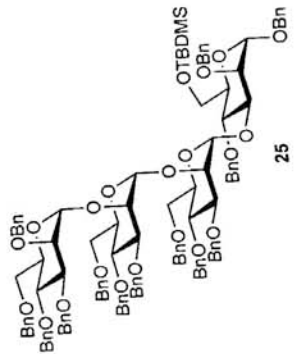

Frequency (MHz) 500.30  
 Nucleus 1H  
 Number of Transients 16  
 Origin avc500  
 Pulse Sequence zg30  
 Receiver Gain 4.00  
 SW(cyclical) (Hz) 10330.58  
 Solvent CHLOROFORM-d  
 Spectrum Offset (Hz) 3065.5417  
 Sweep Width (Hz) 10330.26  
 Temperature (degree C) 24.970

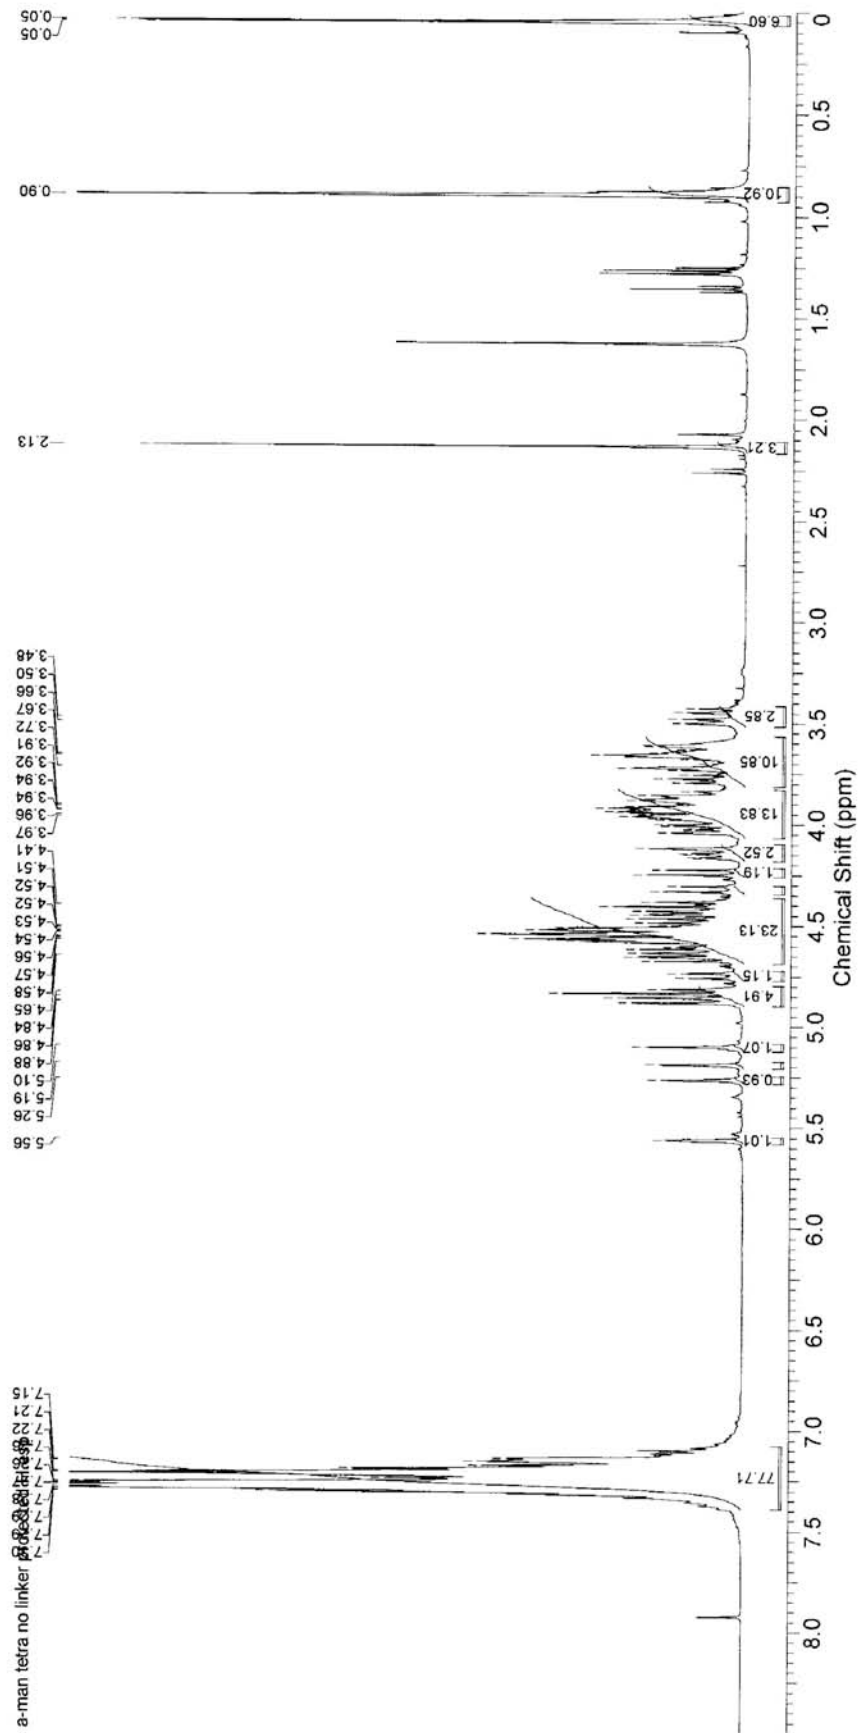

a-man tetra no linker

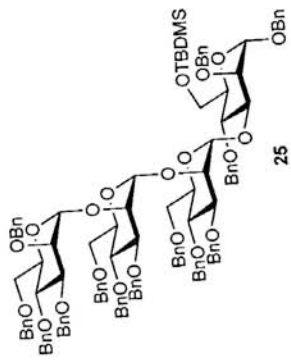

25

a-man tetra no linker protected C.esp

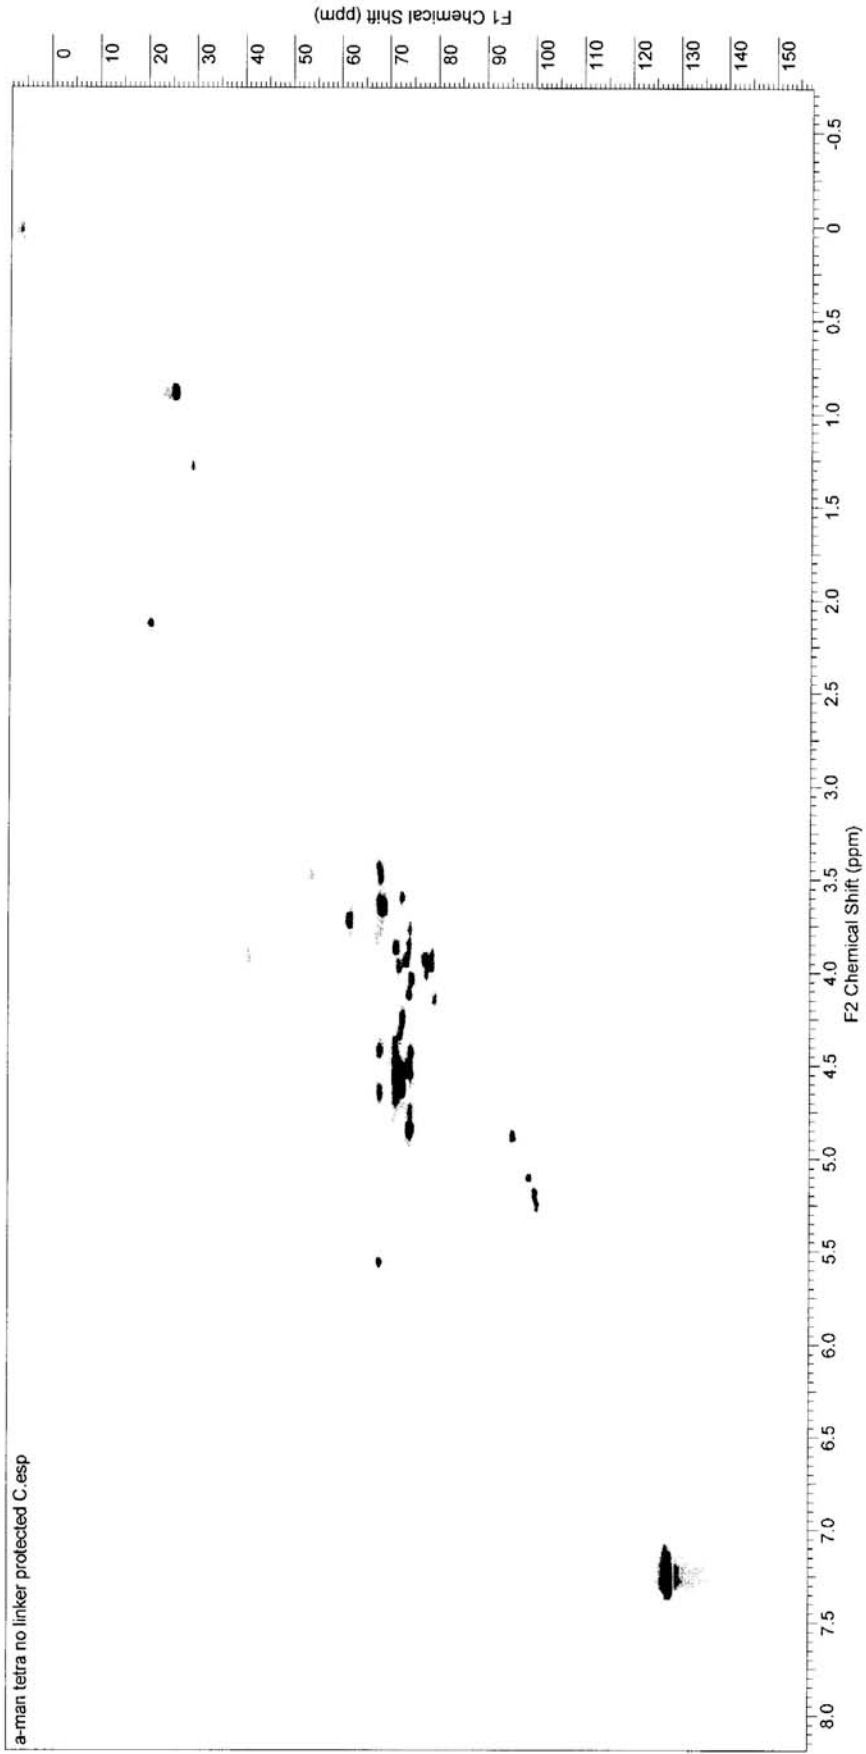



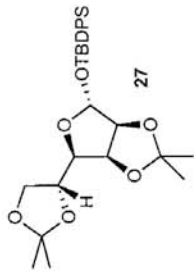

Kj09-58 C.esp

135.7  
135.6  
133.1  
133.0  
129.9  
129.6  
127.8  
127.7

112.5  
109.2  
101.8

87.1

80.6

79.7

77.4

77.1

76.8

73.1

66.9

60.4

52.2

Frequency (MHz) 100.63  
Nucleus 13C  
Number of Transients 256  
Origin av400  
Pulse Sequence zpgp30  
Receiver Gain 32768.00  
SW(cyclical) (Hz) 26178.01  
Solvent CHLORO  
FORM-d  
Spectrum Offset (Hz) 10021.29  
39  
Sweep Width (Hz) 26177.21  
Temperature (degree C) 23.900

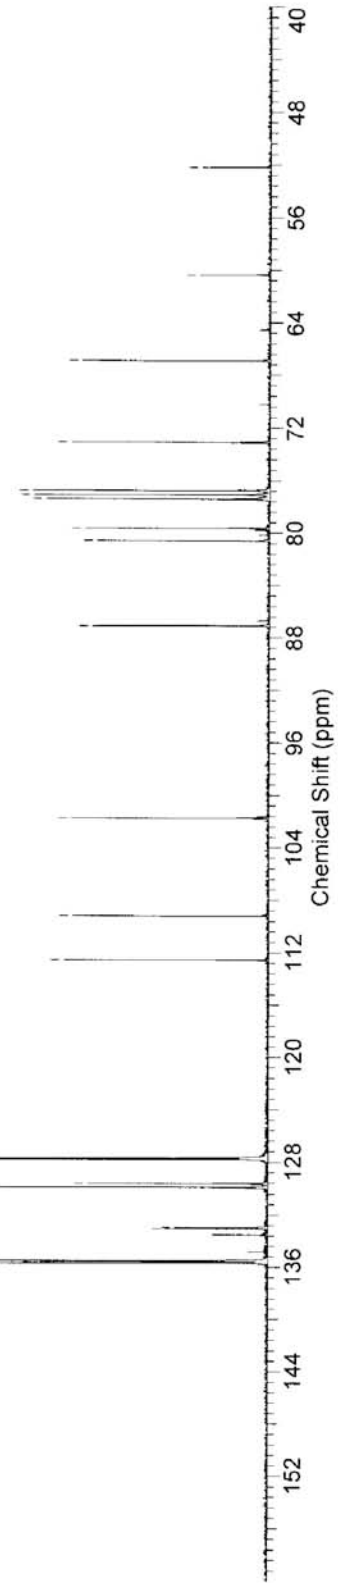



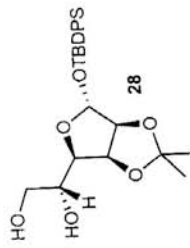

May29-2006-16\_004000fid

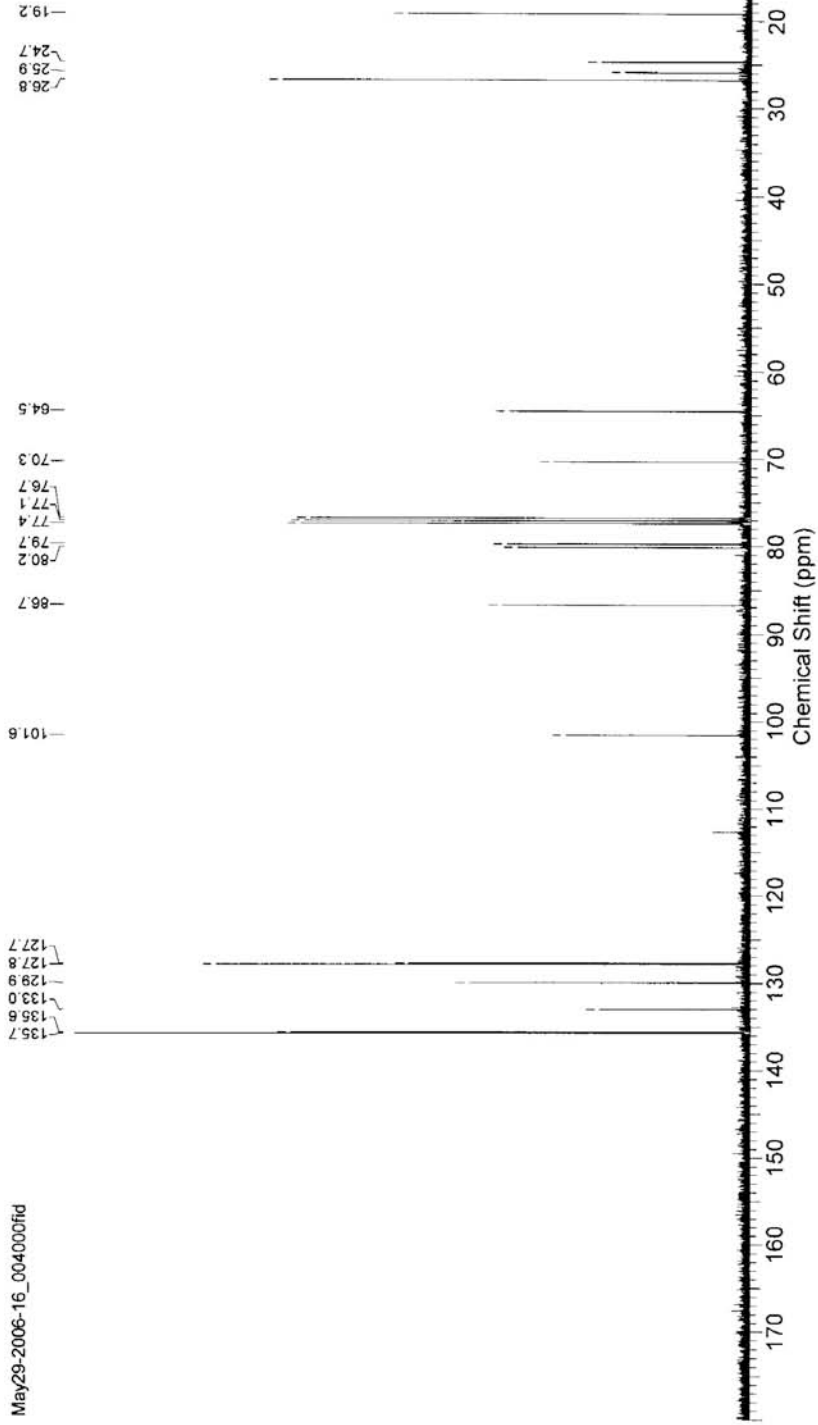

Frequency (MHz) 100.64  
 Nucleus <sup>13</sup>C  
 Number of Transients 256  
 Origin av400  
 Pulse Sequence zgpg30  
 Receiver Gain 32768.00  
 SW(cyclical) (Hz) 26178.01  
 Solvent CHLORO  
 FORM-d  
 Spectrum Offset (Hz) 10023.59  
 47  
 Sweep Width (Hz) 26177.21  
 Temperature (degree C) 23.700





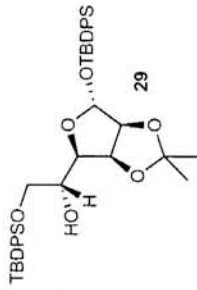

May30-2006-21\_004000fid

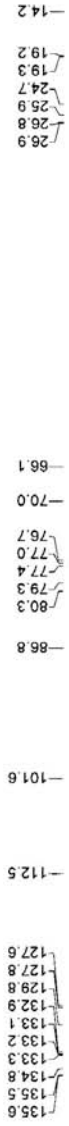

Frequency (MHz) 100.64  
 Nucleus 13C  
 Number of Transients 256  
 Origin av400  
 Pulse Sequence zgpg30  
 Receiver Gain 32768.00  
 SW(cyclical) (Hz) 26178.01  
 Solvent CHLORO  
 FORM-d  
 Spectrum Offset (Hz) 10023.59  
 47  
 Sweep Width (Hz) 26177.21  
 Temperature (degree C) 23.900

Frequency (MHz) 400.20  
 Nucleus 1H  
 Number of Transients 16  
 Origin av400  
 Pulse Sequence zgpg30  
 Receiver Gain 50.80  
 SW(cyclical) (Hz) 8278.15  
 Solvent CHLOROFORM-d  
 Spectrum Offset (Hz) 2468.5974  
 Sweep Width (Hz) 8277.89  
 Temperature (degree C) 23.500

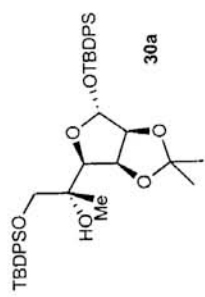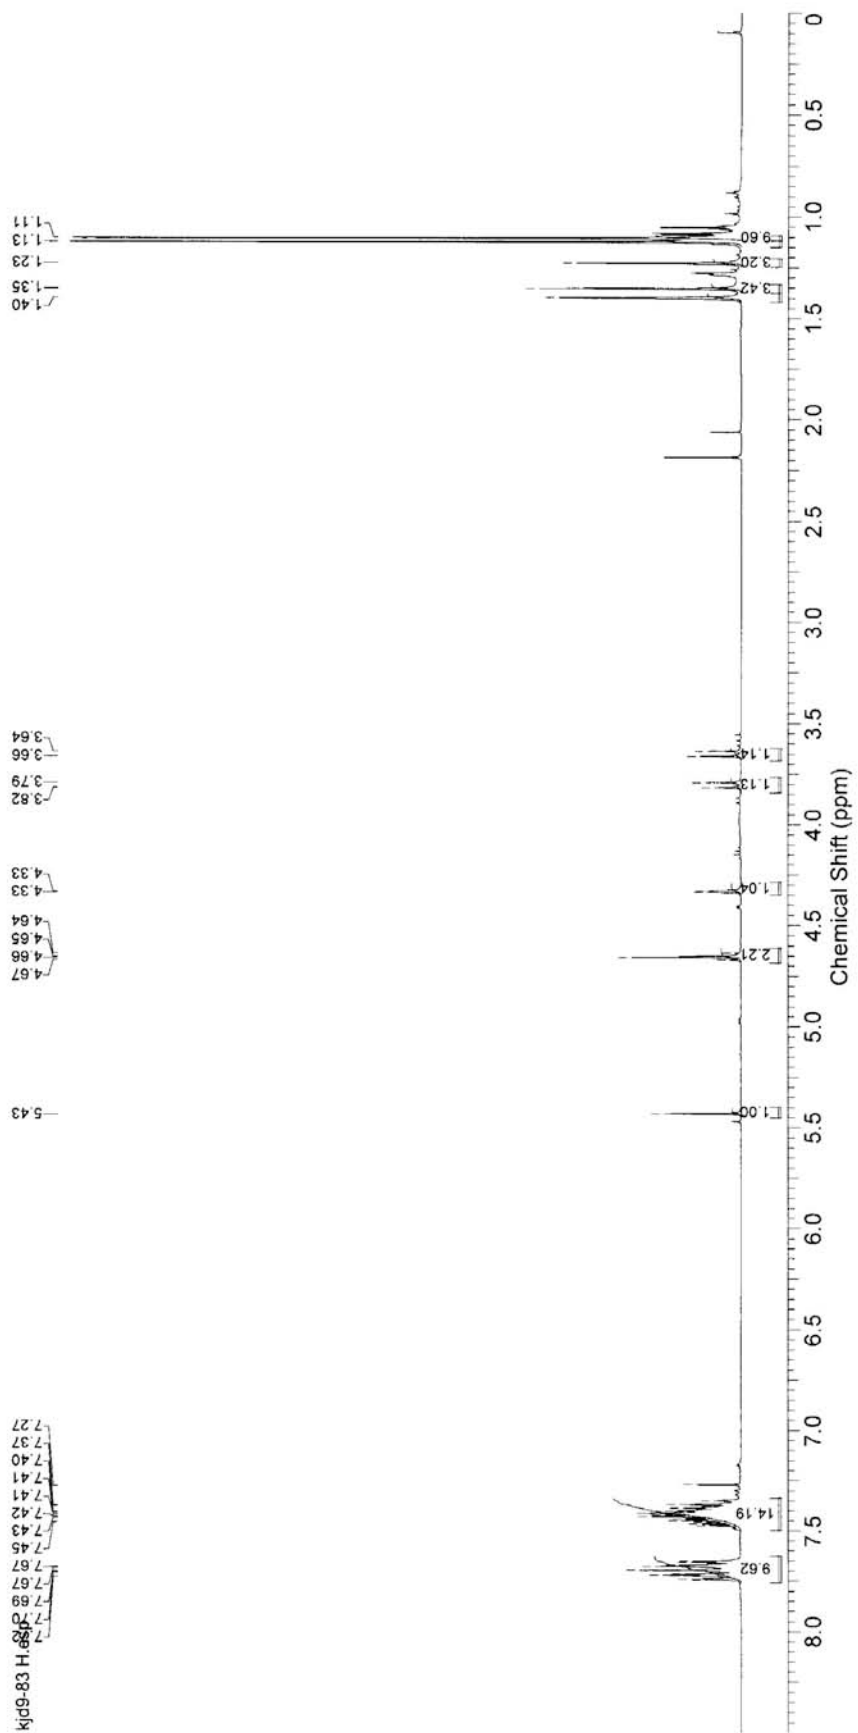

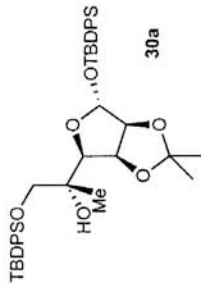

Kj09-83 C.esp

135.8  
135.7  
135.5  
133.3  
133.2  
132.7  
129.8  
127.8  
127.7  
127.6

112.5

87.5  
80.8  
80.2  
77.3  
77.0  
76.7  
73.7  
70.2

26.9  
26.7  
25.6  
24.0  
22.9  
19.3

Frequency (MHz) 100.63  
Nucleus 13C  
Number of Transients 256  
Origin av400  
Pulse Sequence zgpg30  
Receiver Gain 32768.00  
SW(cyclical) (Hz) 26178.01  
Solvent CHLORO  
FORM-d  
Spectrum Offset (Hz) 10021.29  
39  
Sweep Width (Hz) 26177.21  
Temperature (degree C) 23.500

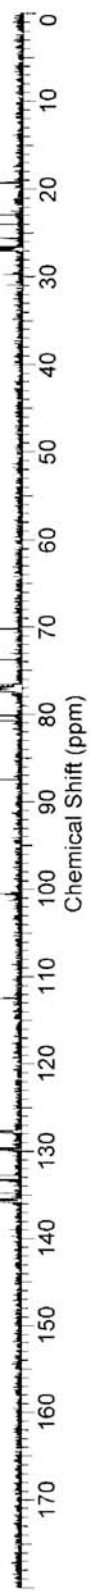

Frequency (MHz) 400.20  
 Nucleus <sup>1</sup>H  
 Number of Transients 16  
 Origin av400  
 Pulse Sequence zg60  
 Receiver Gain 50.80  
 SW(cyclical) (Hz) 8278.15  
 Solvent CHLOROFORM-d  
 Spectrum Offset (Hz) 2468.5974  
 Sweep Width (Hz) 8277.89  
 Temperature (degree C) 22.600

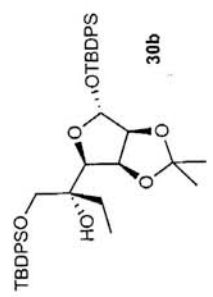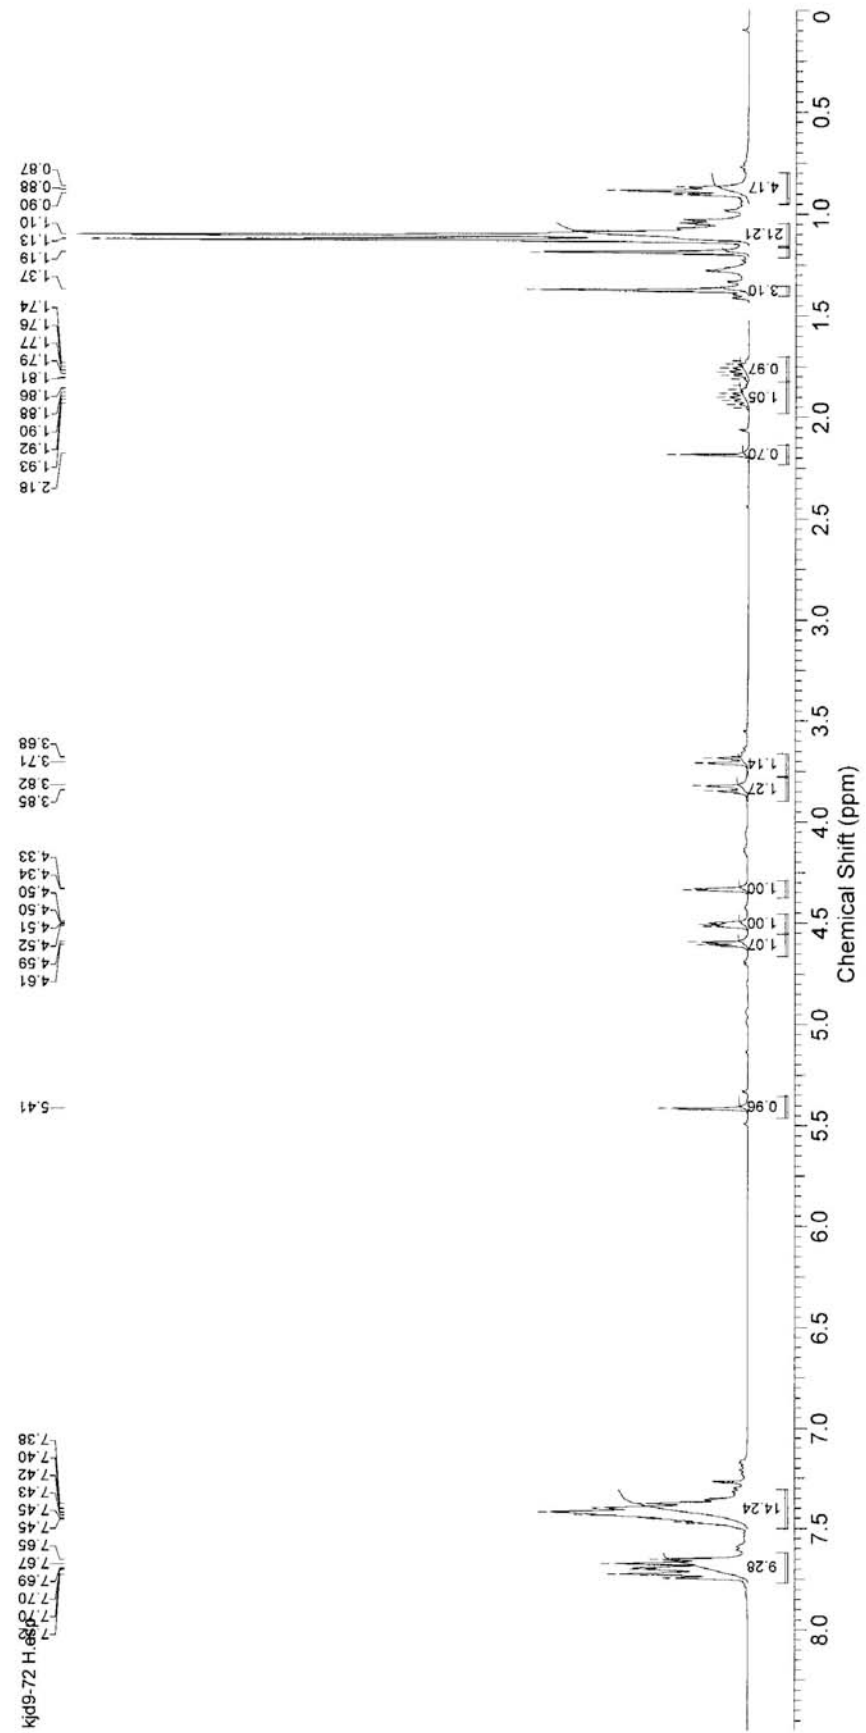

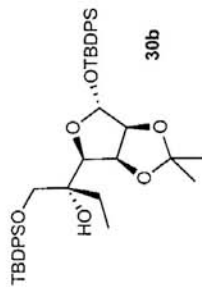

kj09-72 C. esp

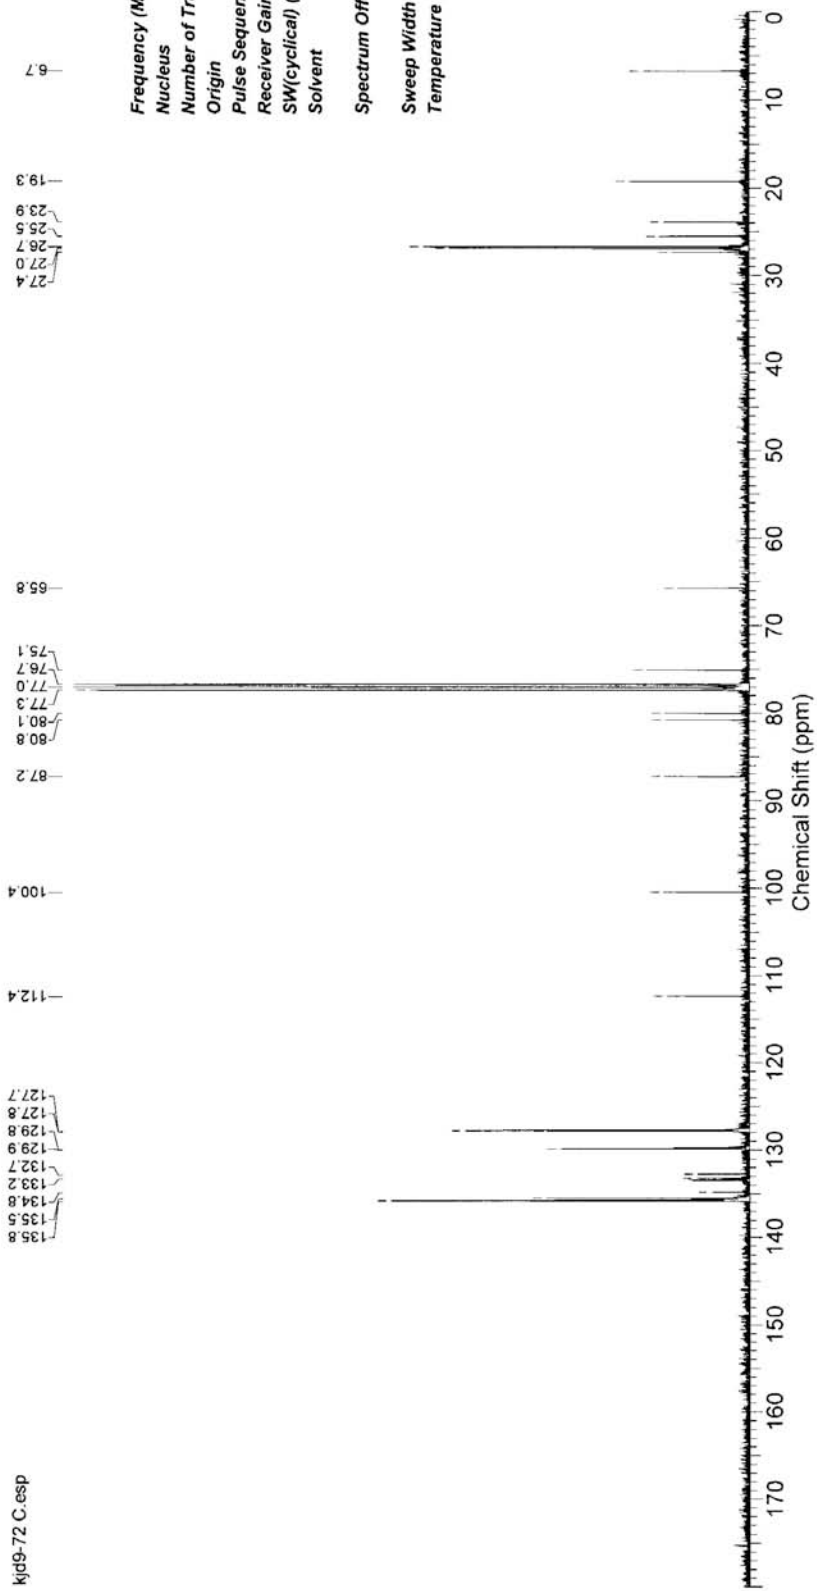

Frequency (MHz) 100.63  
 Nucleus 13C  
 Number of Transients 256  
 Origin av400  
 Pulse Sequence zgpg30  
 Receiver Gain 32768.00  
 SW(cyclical) (Hz) 26178.01  
 Solvent CHLORO  
 Spectrum Offset (Hz) 10021.29  
 Sweep Width (Hz) 26177.21  
 Temperature (degree C) 22.000

Frequency (MHz) 400.20  
 Nucleus <sup>1</sup>H  
 Number of Transients 16  
 Origin av400  
 Pulse Sequence zg60  
 Receiver Gain 90.50  
 SW(cyclical) (Hz) 8278.15  
 Solvent CHLOROFORM-d  
 Spectrum Offset (Hz) 2468.5974  
 Sweep Width (Hz) 8277.89  
 Temperature (degree C) 21.900

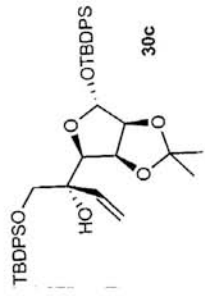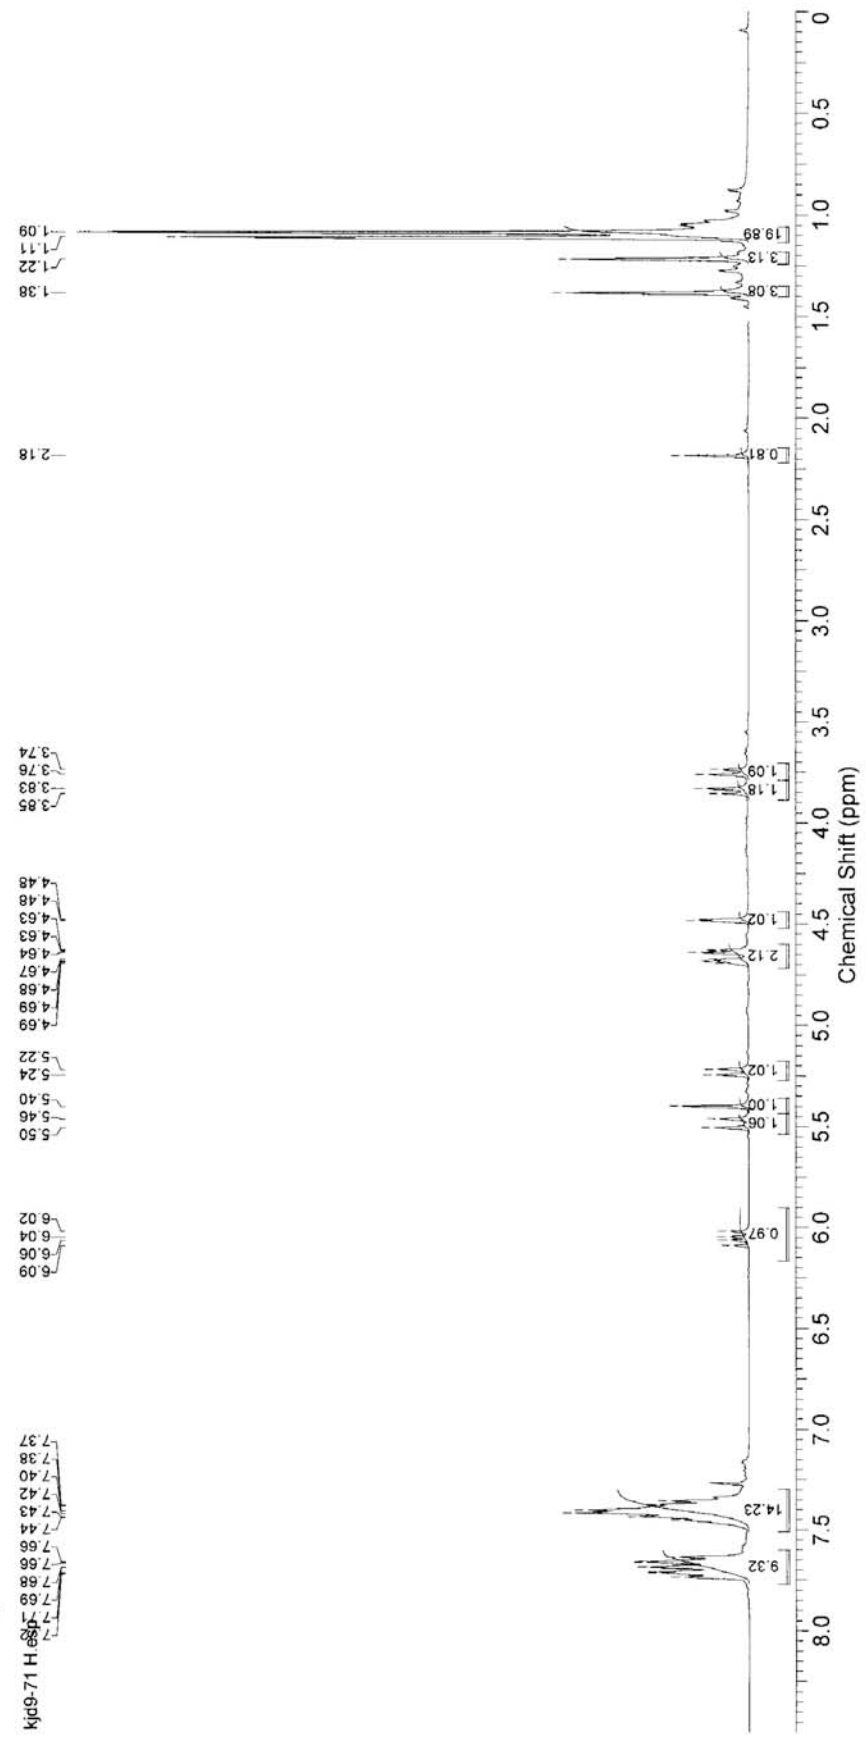







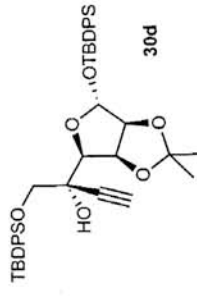

Kjd10-06 C.esp

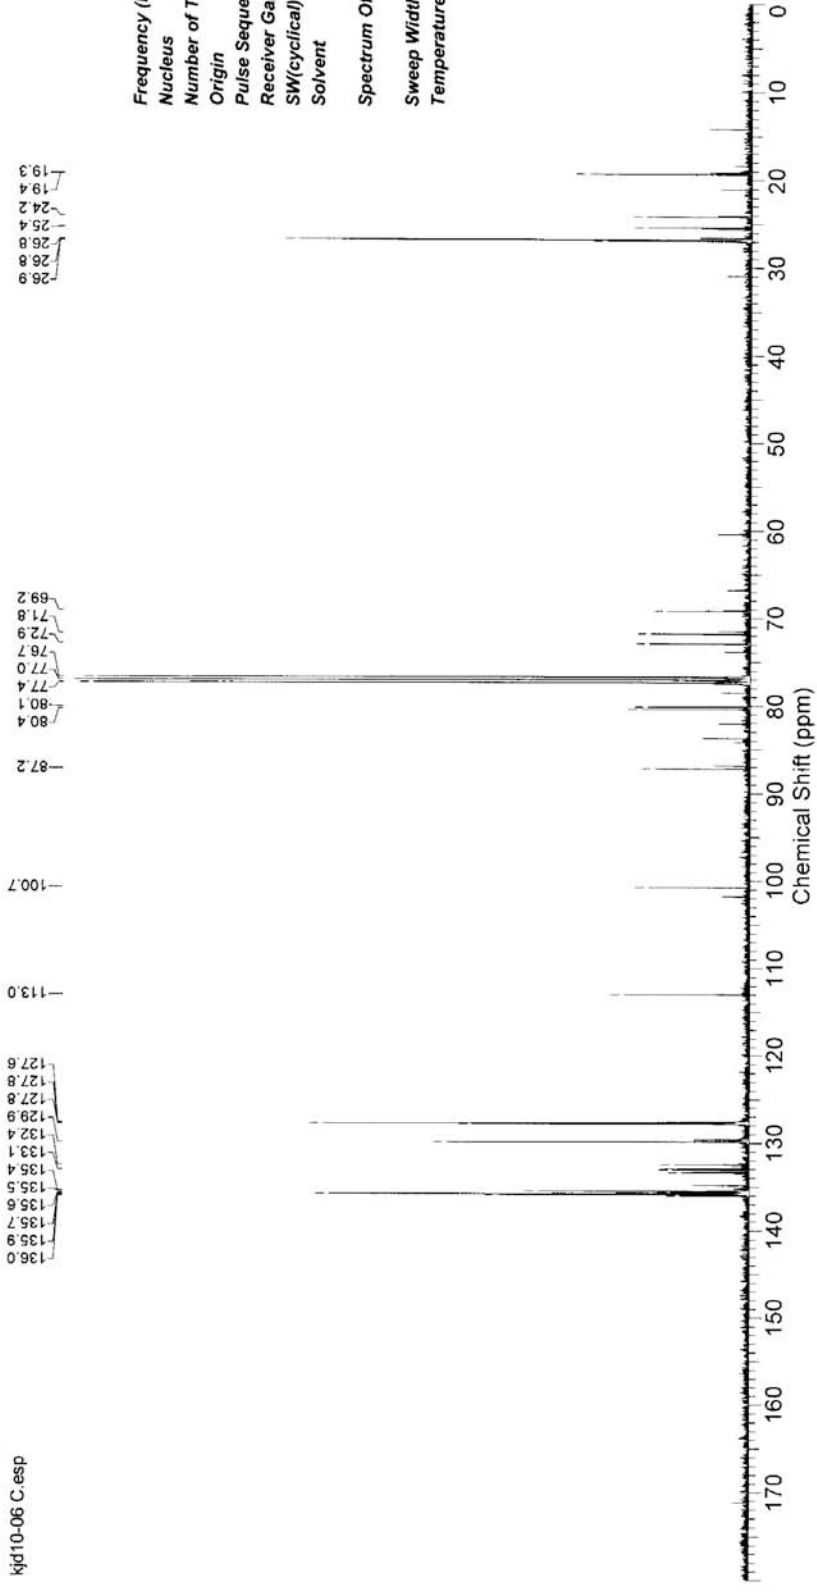

Frequency (MHz) 100.63  
 Nucleus 13C  
 Number of Transients 256  
 Origin av400  
 Pulse Sequence zpg30  
 Receiver Gain 32768.00  
 SW(cyclical) (Hz) 26178.01  
 Solvent CHLORO  
 FORM-d  
 Spectrum Offset (Hz) 10021.29  
 39  
 Sweep Width (Hz) 26177.21  
 Temperature (degree C) 23.000



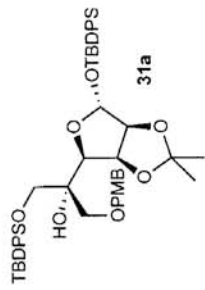

Jun14-2006-11\_004001r

135.7  
135.4  
133.2  
132.7  
129.9  
129.8  
129.7  
129.7  
129.7  
129.3  
127.7  
127.7

81.0  
77.8  
77.3  
77.0  
76.7  
75.7  
73.3

Frequency (MHz) 100.63  
Nucleus 13C  
Number of Transients 256  
Origin av400  
Pulse Sequence zgpg30  
Receiver Gain 32768.00  
SW(cyclical) (Hz) 26178.01  
Solvent CHLORO  
FORM-d  
Spectrum Offset (Hz) 10021.29  
39  
Sweep Width (Hz) 26177.21  
Temperature (degree C) 23.800

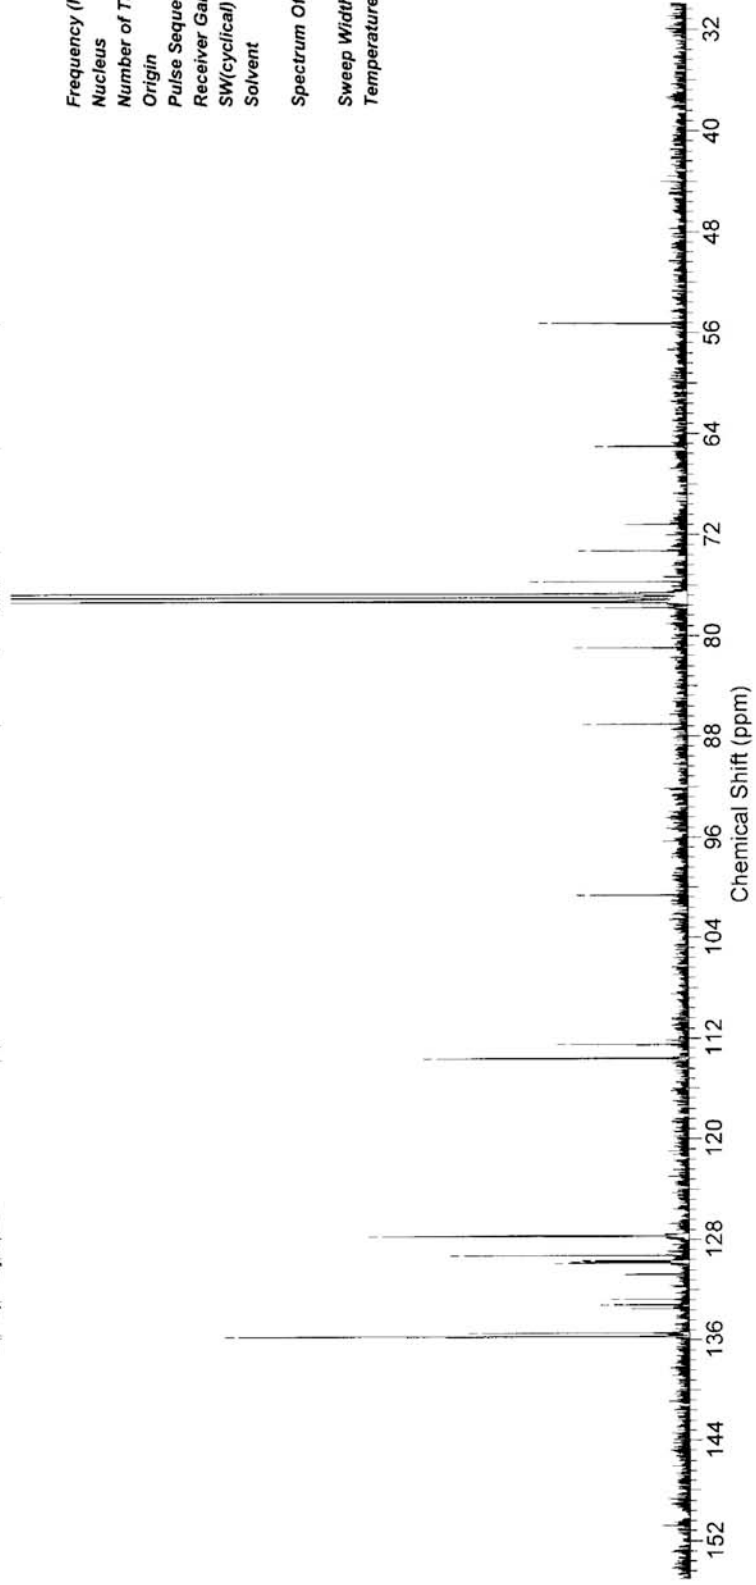

Frequency (MHz) 400.20  
 Nucleus 1H  
 Number of Transients 16  
 Origin av400  
 Pulse Sequence zgpg30  
 Receiver Gain 40.30  
 SW(cyclical) (Hz) 8278.15  
 Solvent CHLOROFORM-d  
 Spectrum Offset (Hz) 2468.5974  
 Sweep Width (Hz) 8277.89  
 Temperature (degree C) 23.200

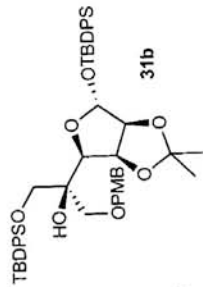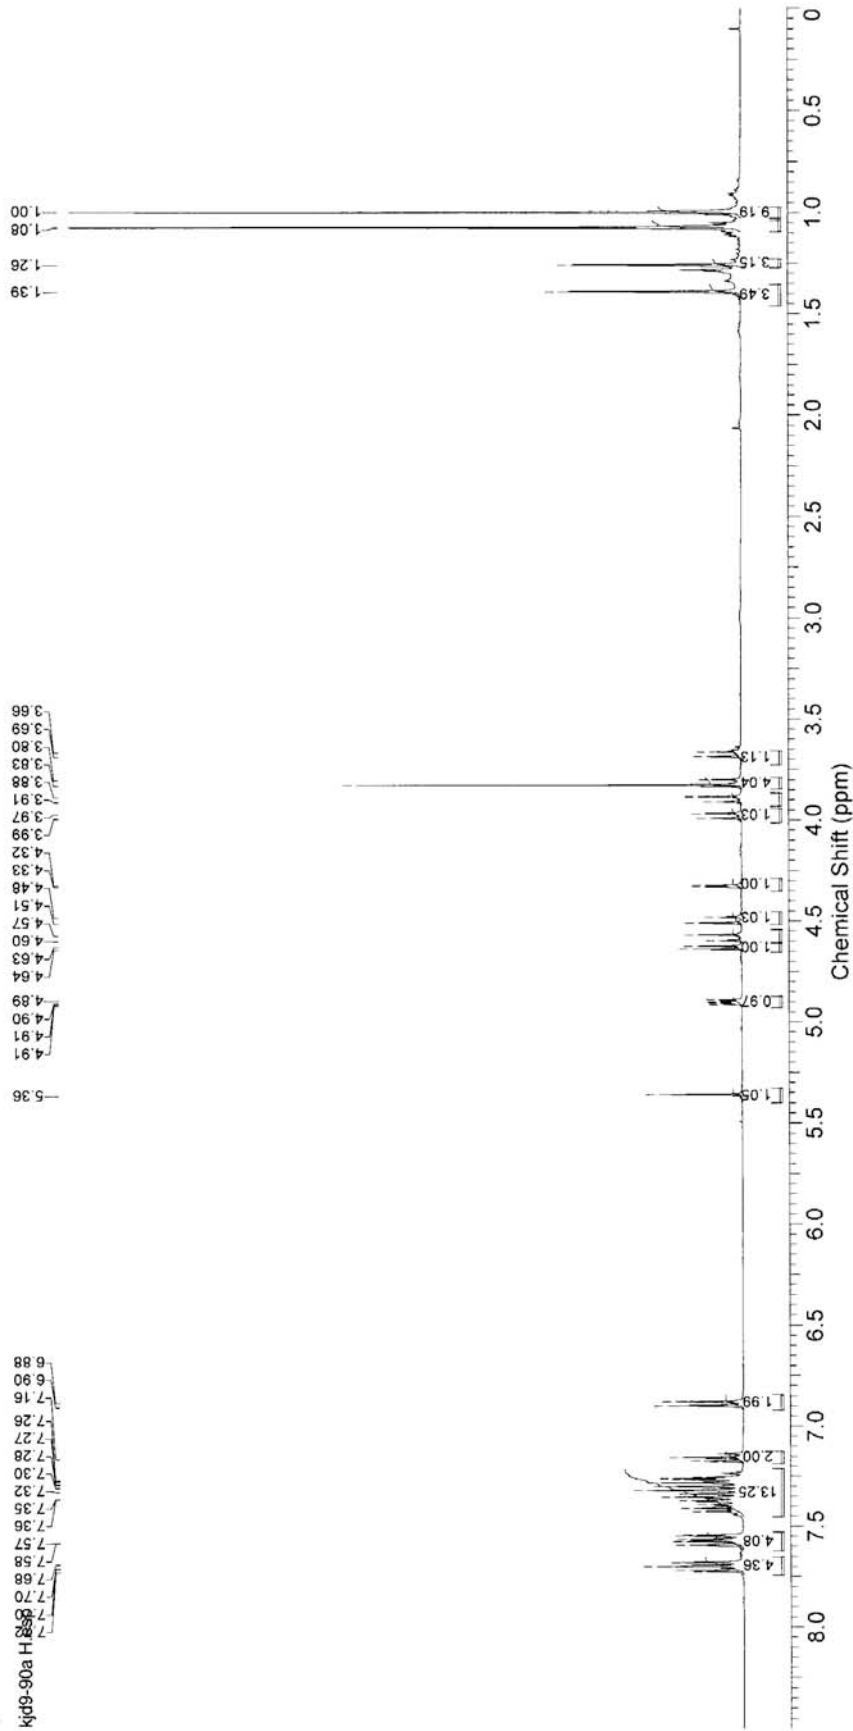

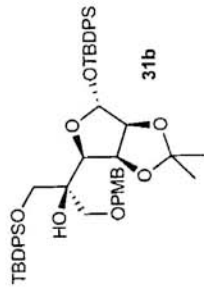

kjd9-90a C.esp

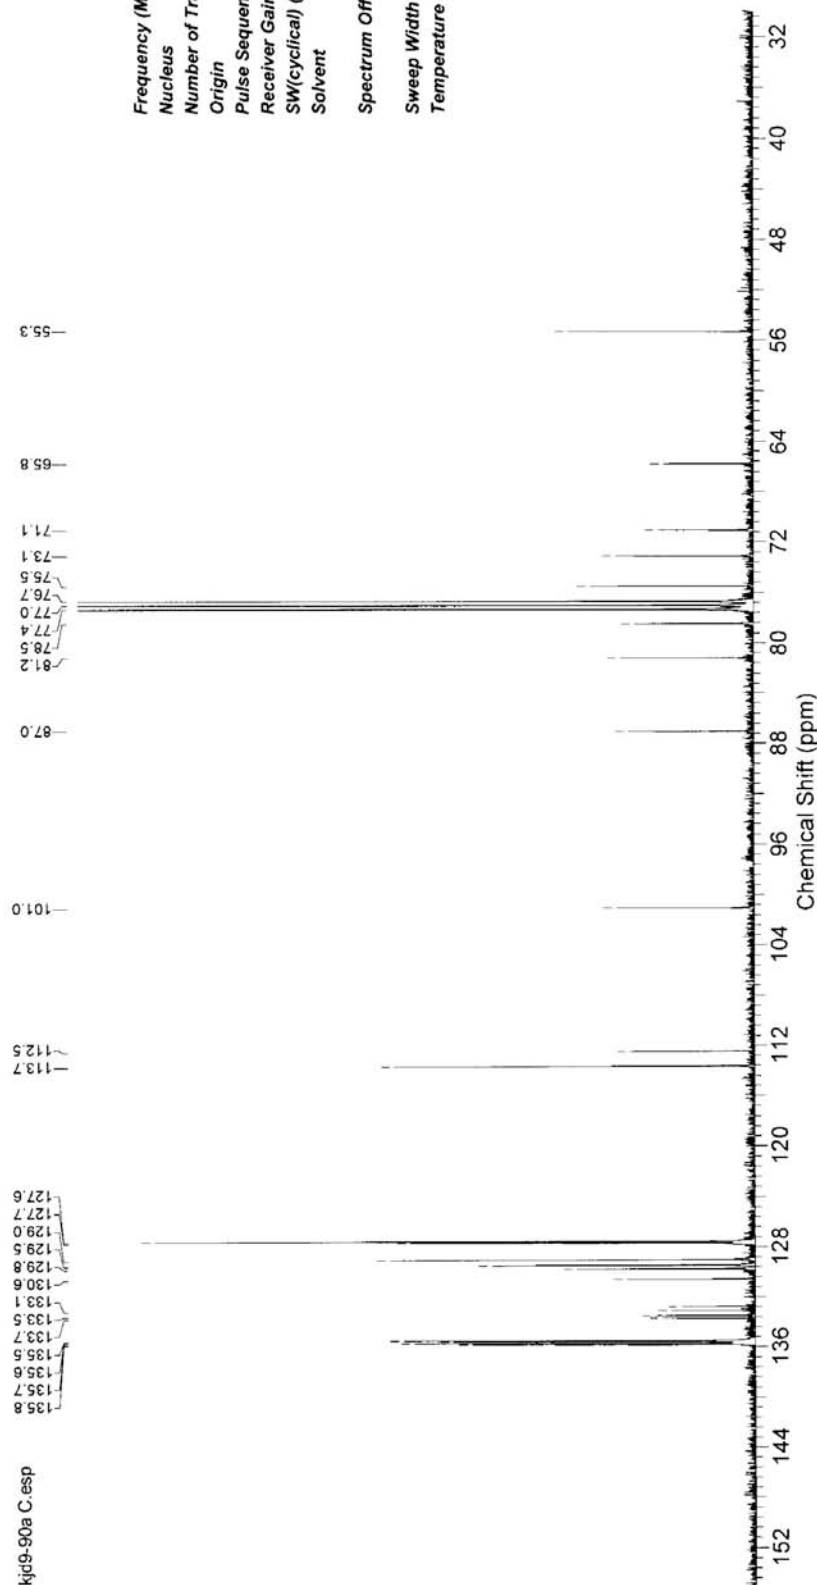

Frequency (MHz) 100.63  
 Nucleus <sup>13</sup>C  
 Number of Transients 256  
 Origin av400  
 Pulse Sequence zgpg30  
 Receiver Gain 32768.00  
 SW(cyclical) (Hz) 26178.01  
 Solvent CHLORO  
 FORM-d  
 Spectrum Offset (Hz) 10021.29  
 39  
 Sweep Width (Hz) 26177.21  
 Temperature (degree C) 23.800

Frequency (MHz) 400.20  
 Nucleus 1H  
 Number of Transients 16  
 Origin av400  
 Pulse Sequence zg60  
 Receiver Gain 90.50  
 SW(cyclical) (Hz) 8278.15  
 Solvent CHLOROFORM-d  
 Spectrum Offset (Hz) 2468.5974  
 Sweep Width (Hz) 8277.89  
 Temperature (degree C) 23.200

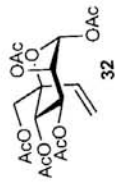

kjd10-15 H.esp

6.08  
 6.08  
 5.95  
 5.94  
 5.93  
 5.66  
 5.65  
 5.64  
 5.63  
 5.61  
 5.44  
 5.44  
 5.43  
 5.09  
 5.08  
 5.08  
 5.05

2.23  
 2.10  
 2.10  
 2.06  
 1.99

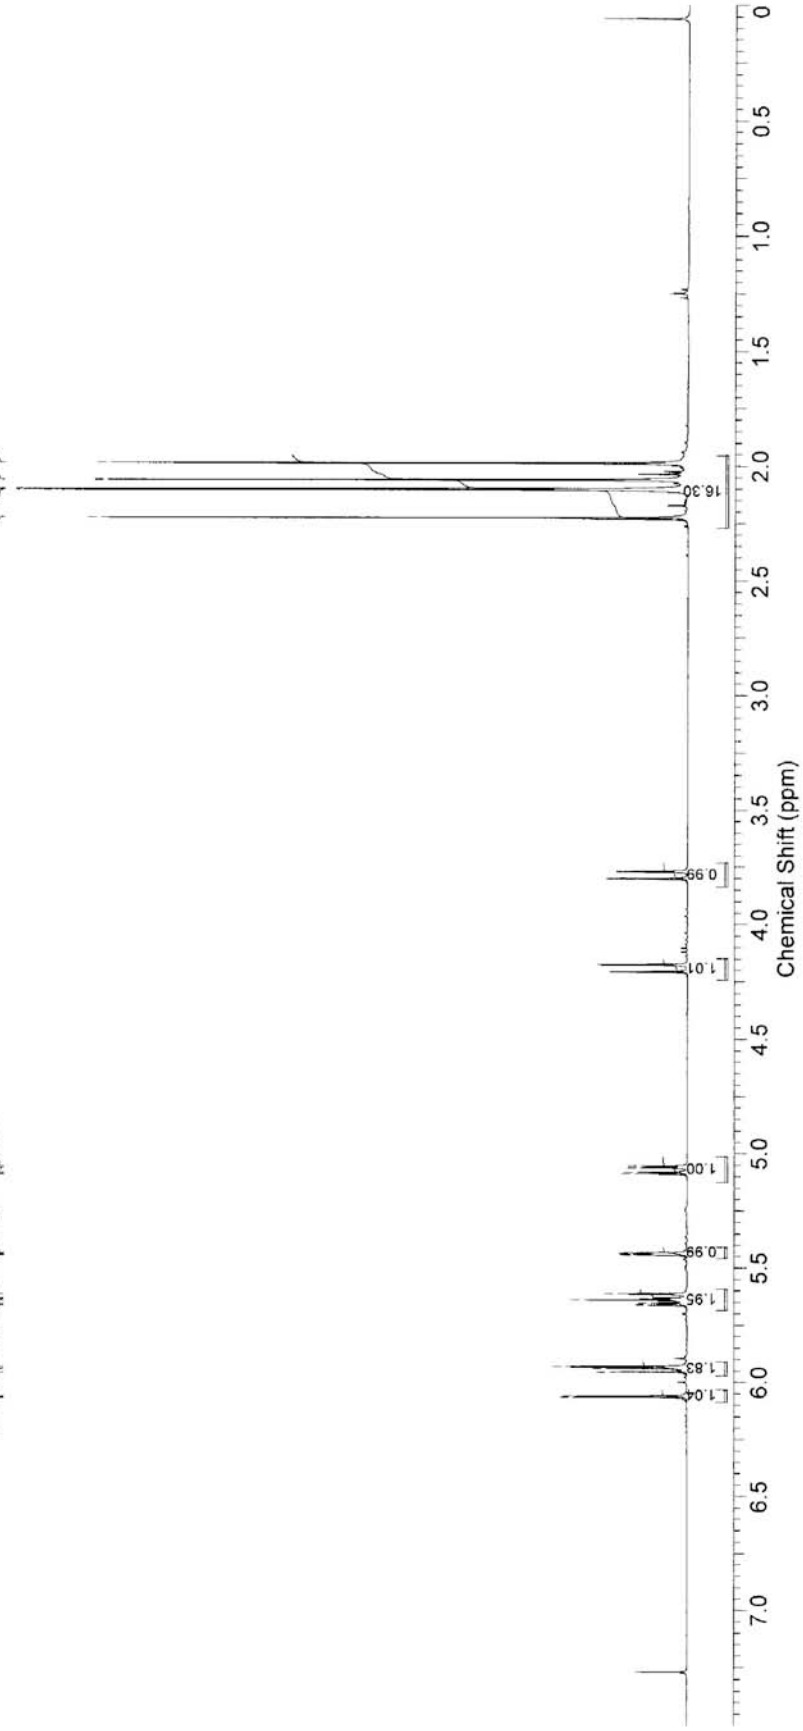

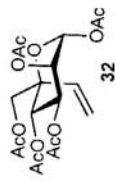

kjd10-15 C.esp

170.5  
170.2  
169.8  
169.3  
168.6

129.1  
122.5

86.6

78.6  
77.3  
77.0  
76.7  
68.9  
68.7  
65.6  
65.4

20.8  
20.7  
20.5

Frequency (MHz) 100.63  
Nucleus 13C  
Number of Transients 256  
Origin aw400  
Pulse Sequence zgpg30  
Receiver Gain 32768.00  
SW(cyclical) (Hz) 26178.01  
Solvent CHLORO  
FORM-d  
Spectrum Offset (Hz) 10021.29  
Sweep Width (Hz) 26177.21  
Temperature (degree C) 23.200

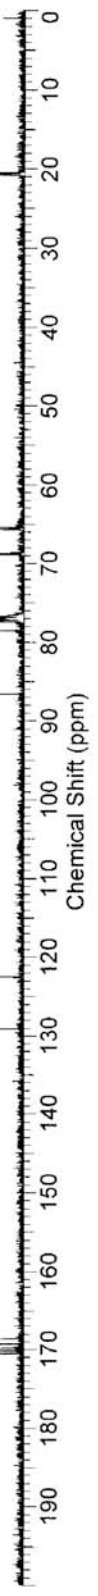



Frequency (MHz) 400.20  
 Nucleus 1H  
 Number of Transients 16  
 Origin av400  
 Pulse Sequence zgpg0  
 Receiver Gain 45.30  
 SW(cyclical) (Hz) 8278.15  
 Solvent CHLOROFORM-d  
 Spectrum Offset (Hz) 2468.5974  
 Sweep Width (Hz) 8277.89  
 Temperature (degree C) 23.300

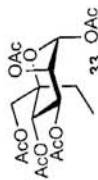

kjd10-80 H.esp

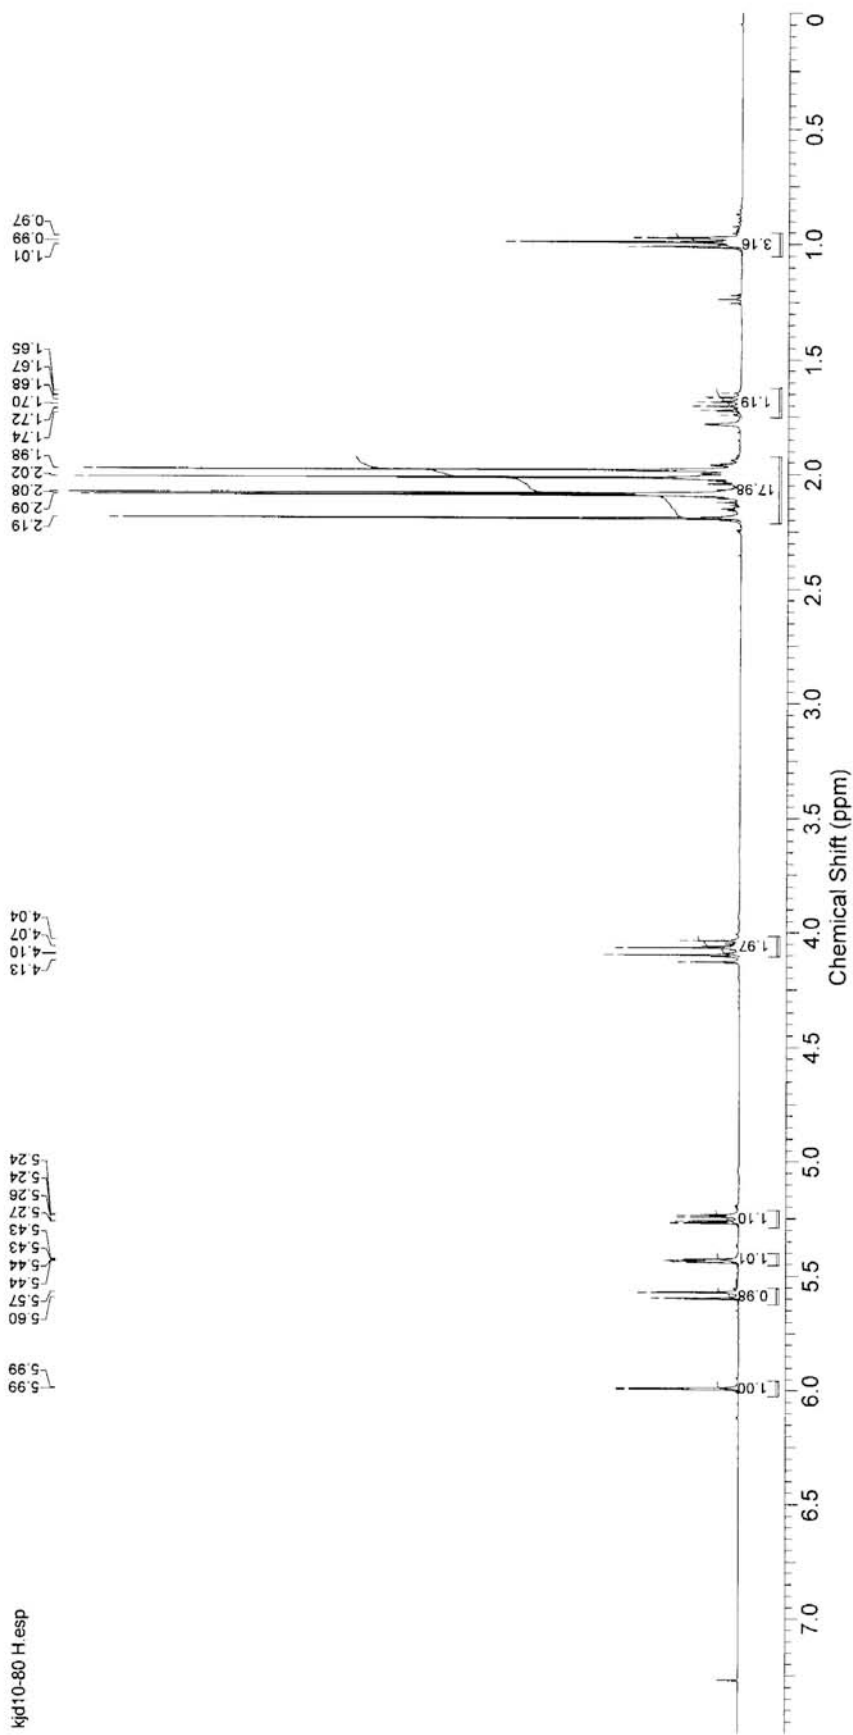

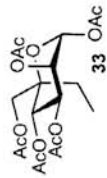

kjcd10-80 C.esp

170.5  
170.2  
169.9  
169.3  
168.6

86.2  
77.7  
77.4  
77.0  
76.7  
68.4  
68.2  
67.0  
64.9

20.8  
20.7  
20.5  
6.0

Frequency (MHz) 100.63  
Nucleus 13C  
Number of Transients 256  
Origin av400  
Pulse Sequence zpgp30  
Receiver Gain 32768.00  
SW(cyclical) (Hz) 26178.01  
Solvent CHLORO  
FORM-d  
Spectrum Offset (Hz) 10021.29  
39  
Sweep Width (Hz) 26177.21  
Temperature (degree C) 23.400

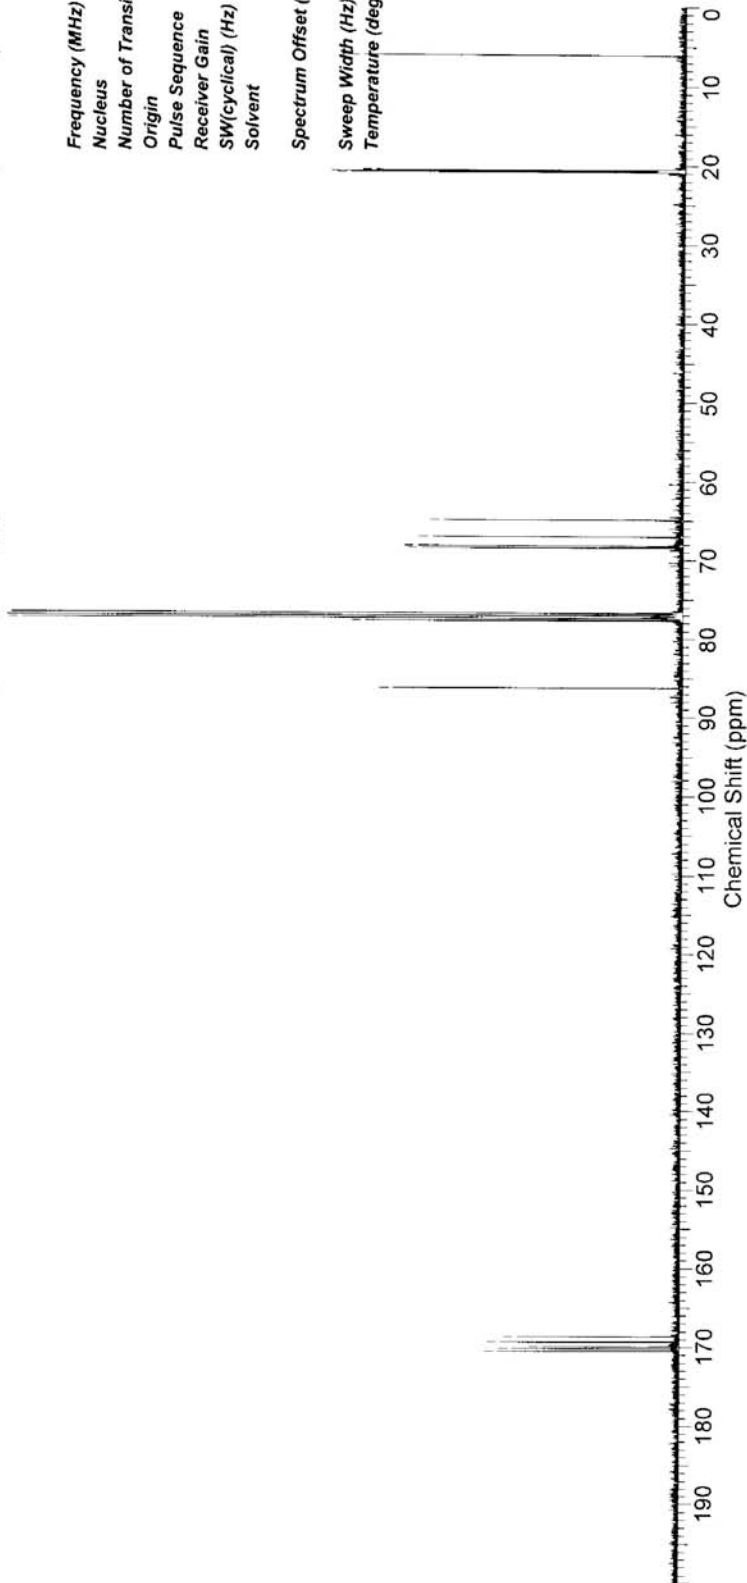

Frequency (MHz) 400.20  
 Nucleus <sup>1</sup>H  
 Number of Transients 16  
 Origin av400  
 Pulse Sequence zg60  
 Receiver Gain 90.50  
 SW(cyclical) (Hz) 8278.15  
 Solvent CHLOROFORM-d  
 Spectrum Offset (Hz) 2468.5974  
 Sweep Width (Hz) 8277.89  
 Temperature (degree C) 23.400

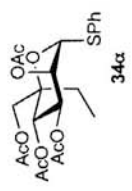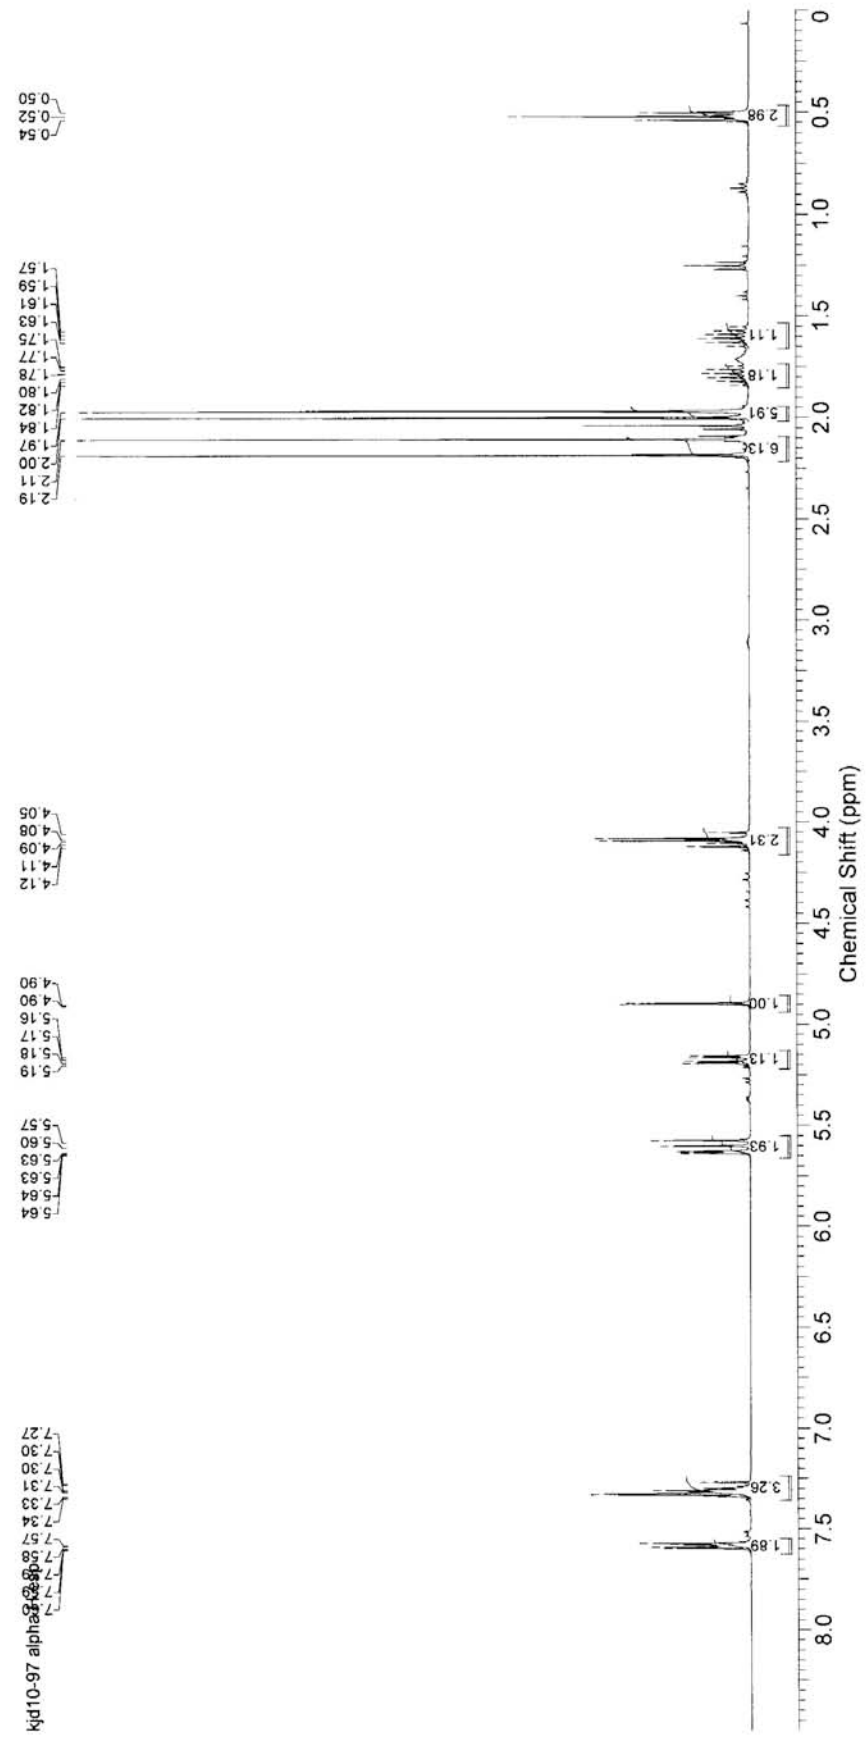

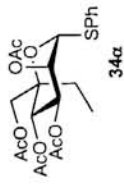

Sep13-2006-49\_004001r  
 169.3  
 170.3  
 170.6

134.6  
 132.2  
 129.0

80.8  
 78.9  
 77.4  
 77.0  
 76.7  
 70.9  
 69.1  
 67.5  
 65.4

20.8  
 20.7  
 20.6  
 19.2

5.6

Frequency (MHz) 100.63  
 Nucleus <sup>13</sup>C  
 Number of Transients 256  
 Origin av400  
 Pulse Sequence zgpg30  
 Receiver Gain 32768.00  
 SW(cyclical) (Hz) 26178.01  
 Solvent CHLORO  
 FORM-d  
 Spectrum Offset (Hz) 10021.29  
 39  
 Sweep Width (Hz) 26177.21  
 Temperature (degree C) 23.700

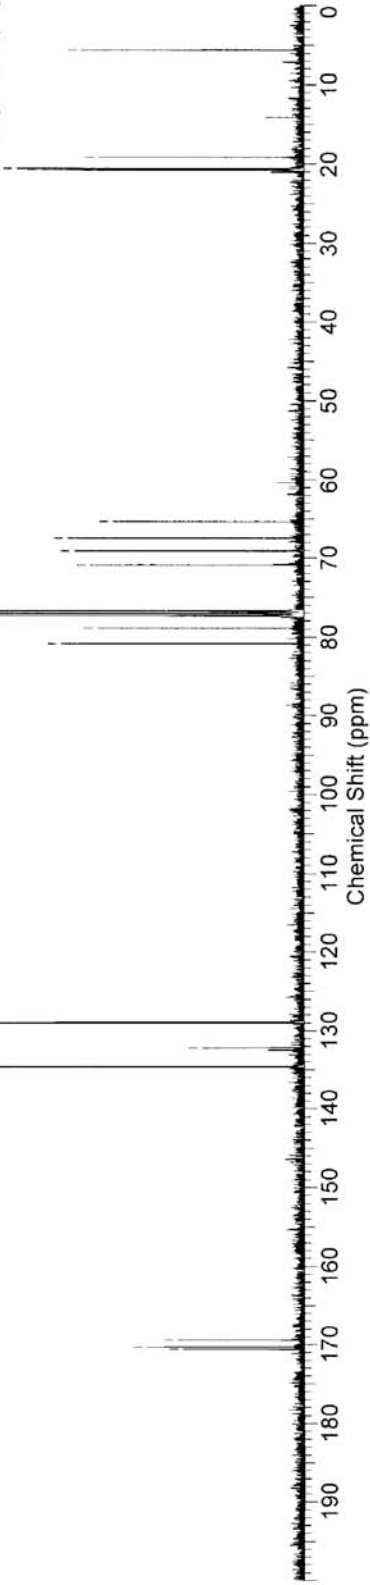

Frequency (MHz) 400.20  
 Nucleus <sup>1</sup>H  
 Number of Transients 16  
 Origin av400  
 Pulse Sequence zg60  
 Receiver Gain 161.30  
 SW(cyclical) (Hz) 8278.15  
 Solvent CHLOROFORM-d  
 Spectrum Offset (Hz) 2468.5974  
 Sweep Width (Hz) 8277.89  
 Temperature (degree C) 23.100

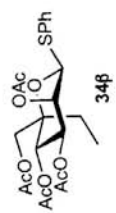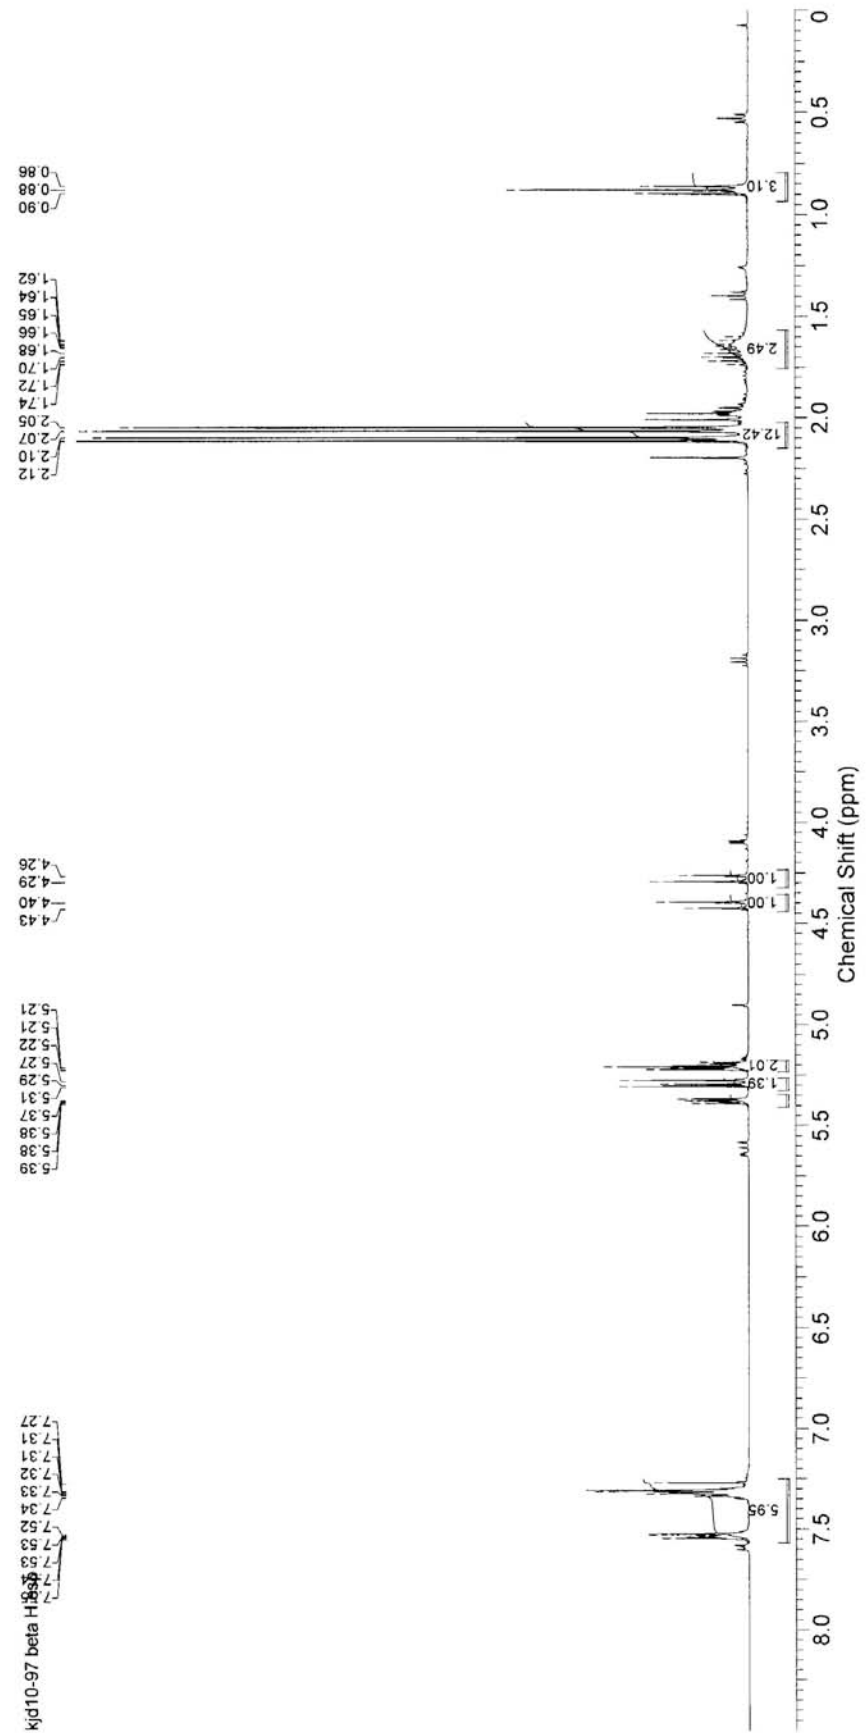

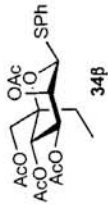

kjd10-97 beta C. esp

170.4  
169.2

134.6  
132.8  
132.5  
128.9  
128.0

80.5  
79.4  
77.3  
77.0  
76.7  
67.9  
67.2  
61.2

25.3  
20.7  
7.2

Frequency (MHz) 100.63  
Nucleus 13C  
Number of Transients 256  
Origin av400  
Pulse Sequence zgpg30  
Receiver Gain 32768.00  
SW(cyclical) (Hz) 26178.01  
Solvent CHLORO  
FORM-d  
Spectrum Offset (Hz) 10021.29  
39  
Sweep Width (Hz) 26177.21  
Temperature (degree C) 23.800

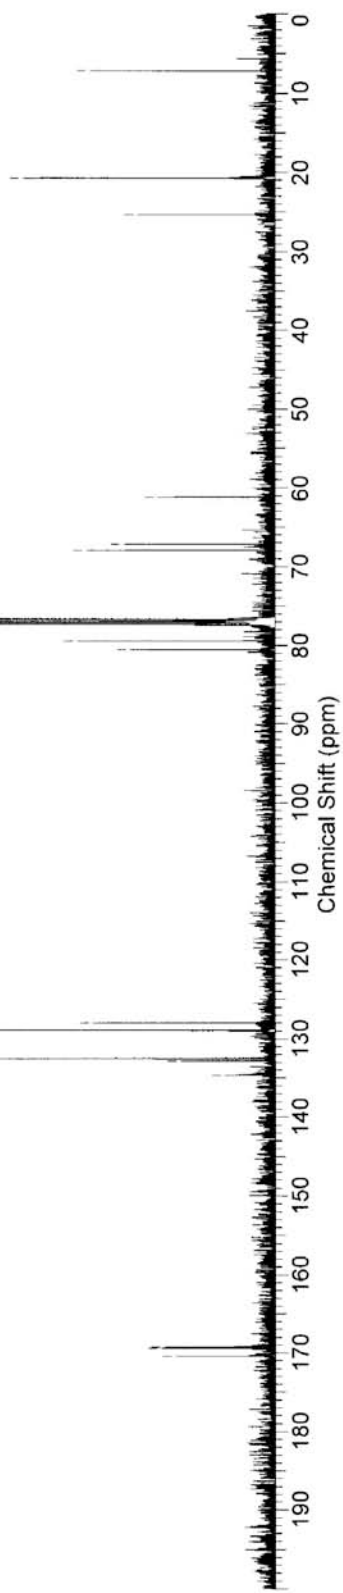

Frequency (MHz) 400.20  
 Nucleus <sup>1</sup>H  
 Number of Transients 16  
 Origin av400  
 Pulse Sequence zg60  
 Receiver Gain 32.00  
 SW(cyclical) (Hz) 8278.15  
 Solvent CHLOROFORM-d  
 Spectrum Offset (Hz) 2468.5974  
 Sweep Width (Hz) 8277.89  
 Temperature (degree C) 22.300

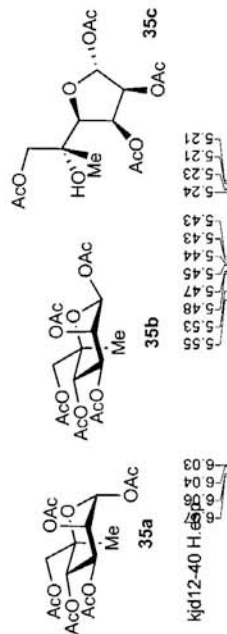

2.17  
2.13  
2.10  
2.08  
2.02  
2.02  
2.00  
1.99  
1.97

4.09  
4.08  
4.07  
4.05  
3.97  
3.95  
3.94

5.55  
5.53  
5.53  
5.48  
5.47  
5.45  
5.44  
5.43  
5.24  
5.23  
5.21  
5.21

5.93  
5.94  
5.95  
5.95

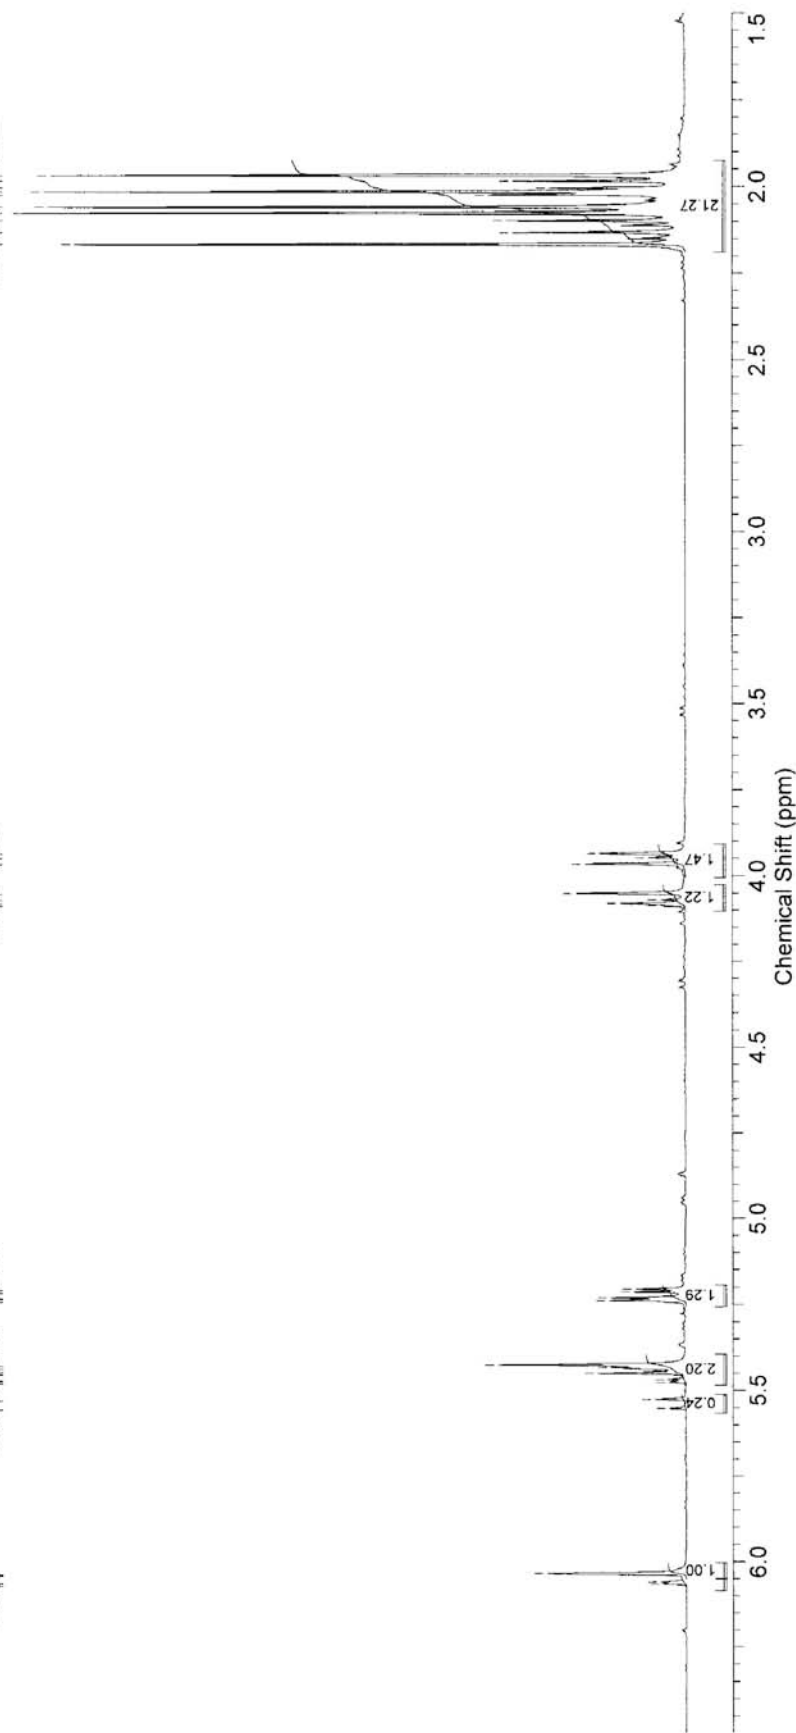

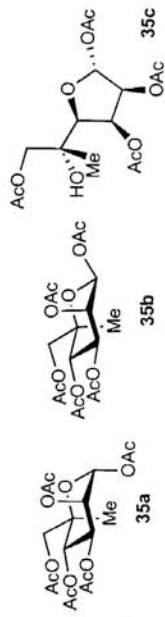

170.5  
170.4  
170.1  
170.0  
169.8  
169.6  
169.4  
168.8  
168.6

kjd12-40 C.esp

21.1  
21.0  
20.7  
20.5  
19.2  
14.9  
14.1

Frequency (MHz) 100.63  
 Nucleus 13C  
 Number of Transients 256  
 Origin av400  
 Pulse Sequence zpgg30  
 Receiver Gain 32768.00  
 SW(cyclical) (Hz) 26178.01  
 Solvent CHLORO  
 FORM-d  
 Spectrum Offset (Hz) 10021.29  
 Sweep Width (Hz) 26177.21  
 Temperature (degree C) 22.500

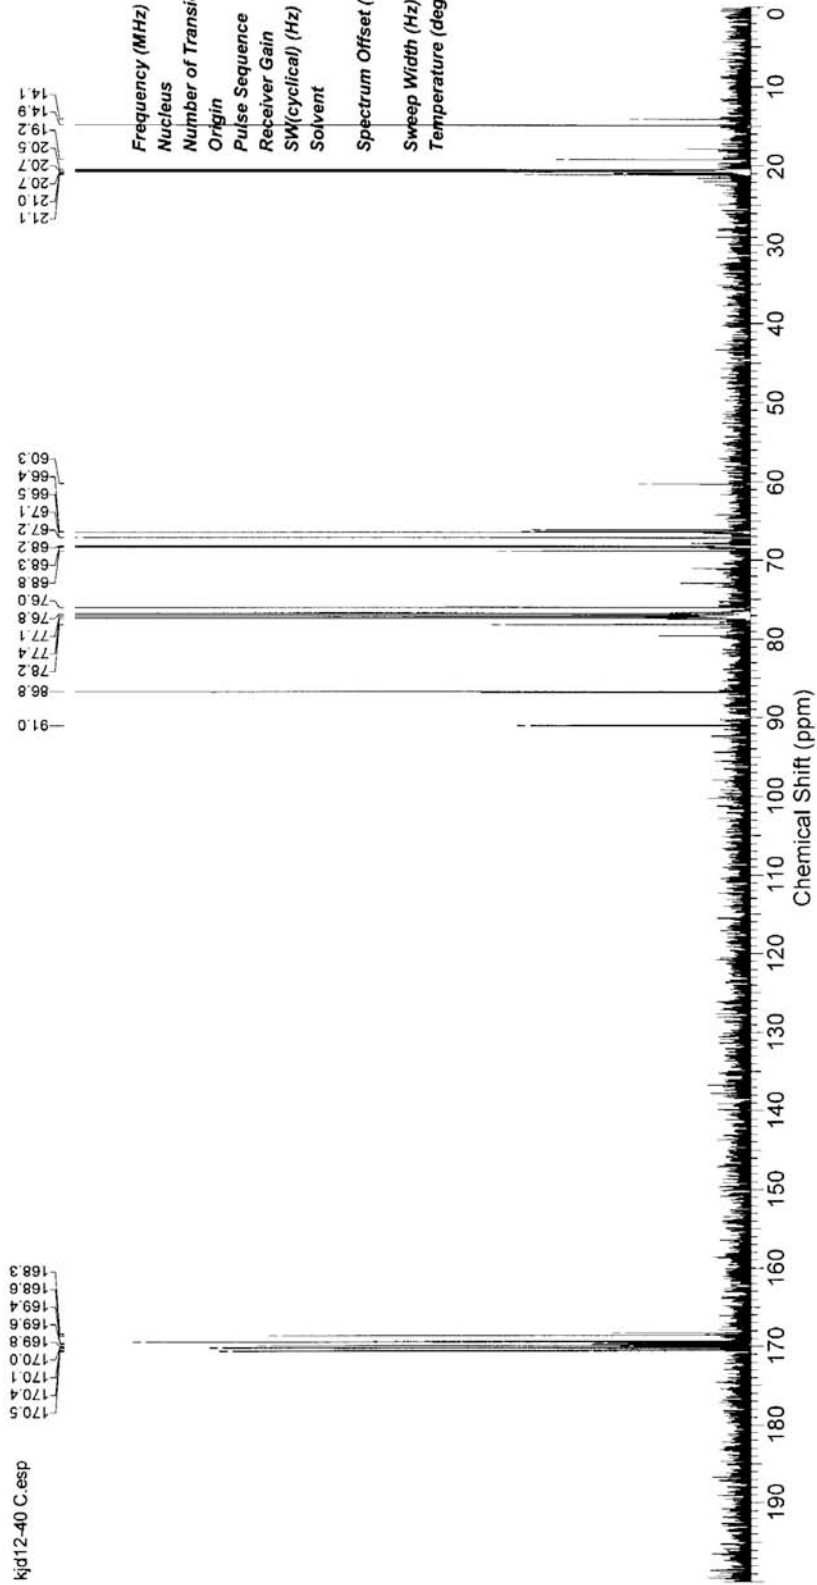



Frequency (MHz) 500.30  
 Nucleus 1H  
 Number of Transients 16  
 Origin avc500  
 Pulse Sequence zg30  
 Receiver Gain 4.00  
 SW(cyclical) (Hz) 10330.58  
 Solvent CHLOROFORM-d  
 Spectrum Offset (Hz) 3065.5417  
 Sweep Width (Hz) 10330.26  
 Temperature (degree C) 24.970

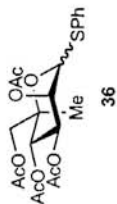

kjd12-32 H.esp

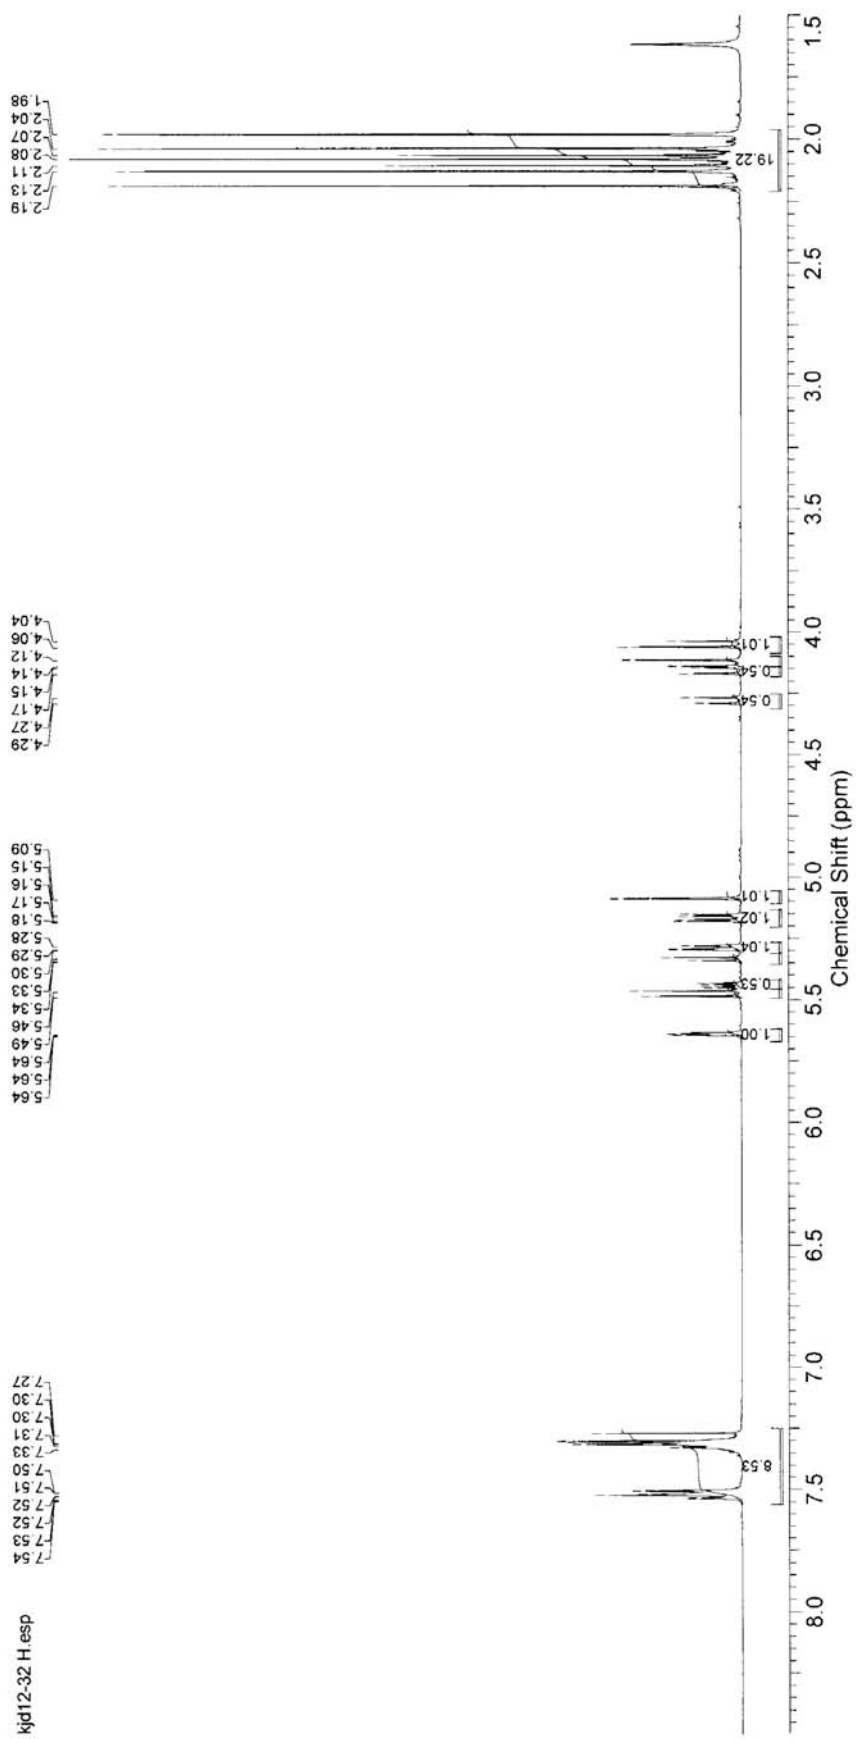

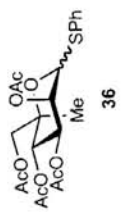

kjcd12-32 C.esp

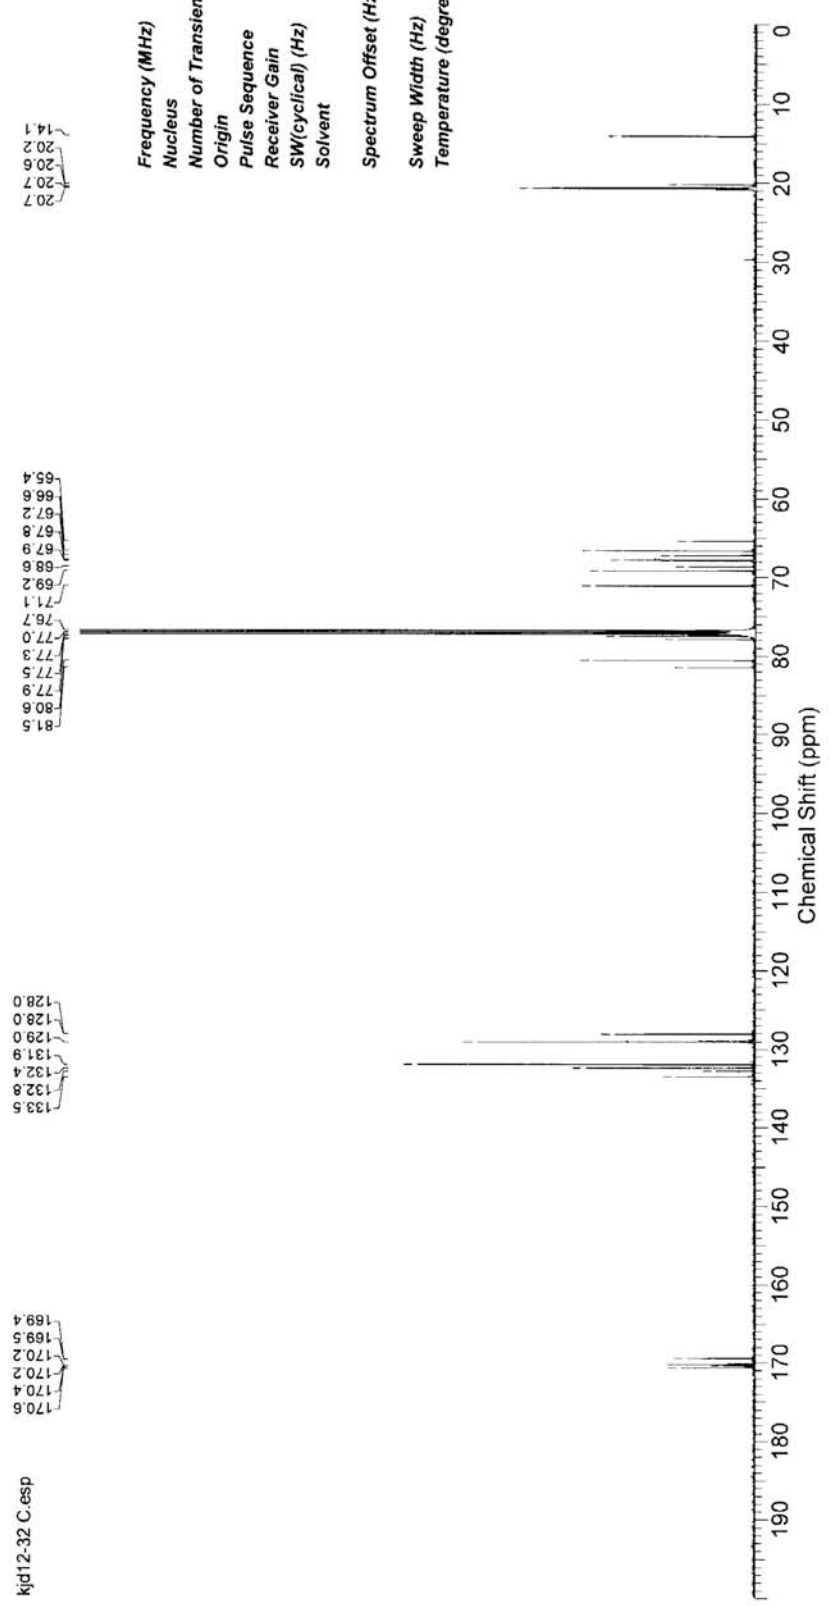

Frequency (MHz) 125.80  
 Nucleus 13C  
 Number of Transients 256  
 Origin avc500  
 Pulse Sequence zgpg30  
 Receiver Gain 1620.00  
 SW(cyclical) (Hz) 31250.00  
 Solvent CHLORO  
 FORM-d  
 Spectrum Offset (Hz) 12571.30  
 Sweep Width (Hz) 47  
 Sweep Width (degree C) 31249.05  
 Temperature (degree C) 24.970

Frequency (MHz) 400.20  
 Nucleus 1H  
 Number of Transients 16  
 Origin av400  
 Pulse Sequence zg60  
 Receiver Gain 90.50  
 SW(cyclical) (Hz) 8278.15  
 Solvent CHLOROFORM-d  
 Spectrum Offset (Hz) 2468.5974  
 Sweep Width (Hz) 8277.89  
 Temperature (degree C) 27.000

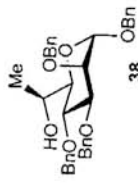

kjd15-24 H esp  
 7.36  
7.34  
7.33  
7.33  
7.32  
7.30  
7.28  
7.27

5.00  
4.97  
4.95  
4.94  
4.80  
4.77  
4.74  
4.71  
4.70  
4.67  
4.66  
4.65  
4.45  
4.42  
4.15  
4.12  
4.00  
3.99  
3.84  
3.84  
3.83  
3.53  
3.52  
3.50  
3.50

2.07  
2.05  
1.31  
1.33

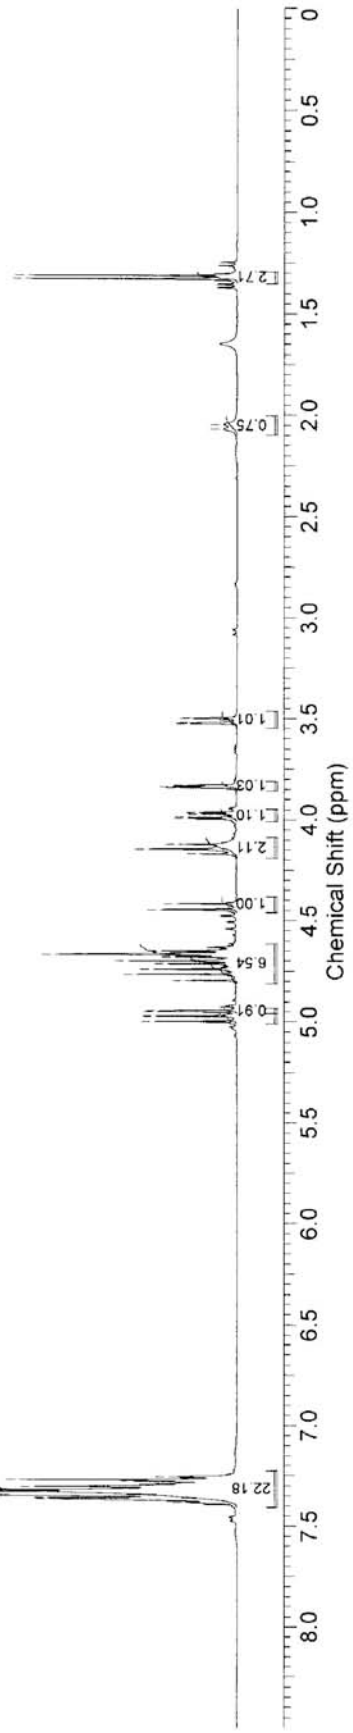

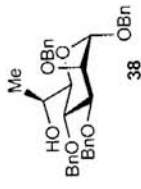

kjd15-24 C.esp

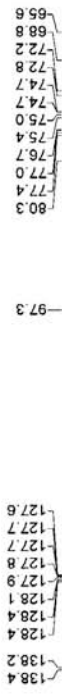

20.3

Frequency (MHz) 100.63  
Nucleus 13C  
Number of Transients 256  
Origin av400  
Pulse Sequence zpgg30  
Receiver Gain 32768.00  
SW(cyclical) (Hz) 26178.01  
Solvent CHLORO  
FORM-d  
Spectrum Offset (Hz) 10021.29  
39  
Sweep Width (Hz) 26177.21  
Temperature (degree C) 27.000

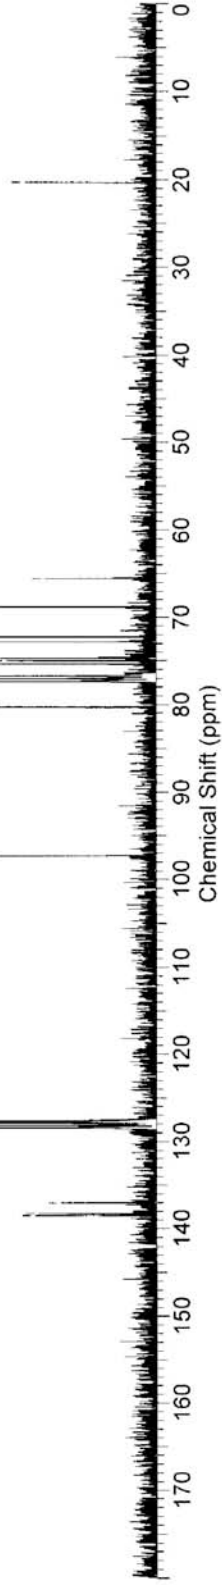

Frequency (MHz) 400.20  
 Nucleus 1H  
 Number of Transients 16  
 Origin av400  
 Pulse Sequence zg60  
 Receiver Gain 32.00  
 SW(cyclical) (Hz) 8278.15  
 Solvent CHLOROFORM-d  
 Spectrum Offset (Hz) 2468.5974  
 Sweep Width (Hz) 8277.89  
 Temperature (degree C) 27.000

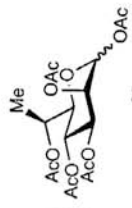

kjd15-19 1288p  
 5.79  
5.78  
5.48  
5.47  
5.36  
5.33  
5.31  
5.30  
5.29  
5.26  
5.25  
5.24  
5.24  
5.02  
5.02  
5.01  
5.00

2.20  
2.16  
2.13  
2.08  
2.06  
2.00  
1.99  
1.99  
1.96  
1.96  
1.29  
1.28  
1.24  
1.24  
1.23  
1.22

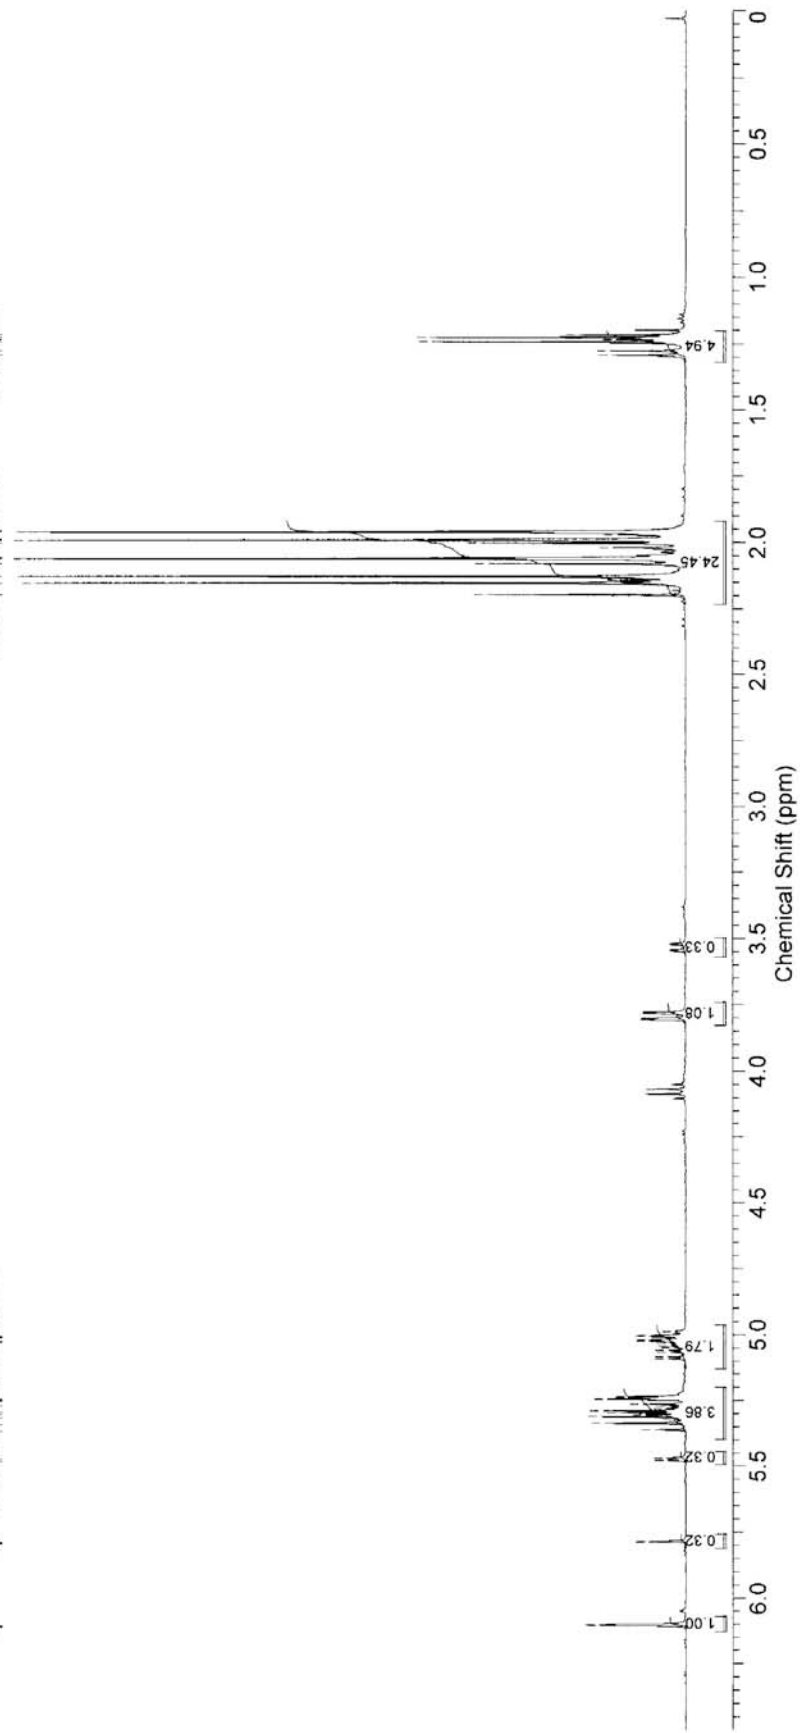

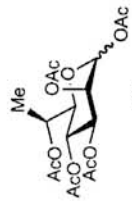

Kj1d15-19 C 63

167.9  
168.4  
169.4  
169.7  
169.8  
170.0  
170.2  
171.2  
171.5  
171.6  
171.7  
171.8  
171.9  
172.0  
172.1  
172.2  
172.3  
172.4  
172.5  
172.6  
172.7  
172.8  
172.9  
173.0  
173.1  
173.2  
173.3  
173.4  
173.5  
173.6  
173.7  
173.8  
173.9  
174.0  
174.1  
174.2  
174.3  
174.4  
174.5  
174.6  
174.7  
174.8  
174.9  
175.0  
175.1  
175.2  
175.3  
175.4  
175.5  
175.6  
175.7  
175.8  
175.9  
176.0  
176.1  
176.2  
176.3  
176.4  
176.5  
176.6  
176.7  
176.8  
176.9  
177.0  
177.1  
177.2  
177.3  
177.4  
177.5  
177.6  
177.7  
177.8  
177.9  
178.0  
178.1  
178.2  
178.3  
178.4  
178.5  
178.6  
178.7  
178.8  
178.9  
179.0  
179.1  
179.2  
179.3  
179.4  
179.5  
179.6  
179.7  
179.8  
179.9  
180.0  
180.1  
180.2  
180.3  
180.4  
180.5  
180.6  
180.7  
180.8  
180.9  
181.0  
181.1  
181.2  
181.3  
181.4  
181.5  
181.6  
181.7  
181.8  
181.9  
182.0  
182.1  
182.2  
182.3  
182.4  
182.5  
182.6  
182.7  
182.8  
182.9  
183.0  
183.1  
183.2  
183.3  
183.4  
183.5  
183.6  
183.7  
183.8  
183.9  
184.0  
184.1  
184.2  
184.3  
184.4  
184.5  
184.6  
184.7  
184.8  
184.9  
185.0  
185.1  
185.2  
185.3  
185.4  
185.5  
185.6  
185.7  
185.8  
185.9  
186.0  
186.1  
186.2  
186.3  
186.4  
186.5  
186.6  
186.7  
186.8  
186.9  
187.0  
187.1  
187.2  
187.3  
187.4  
187.5  
187.6  
187.7  
187.8  
187.9  
188.0  
188.1  
188.2  
188.3  
188.4  
188.5  
188.6  
188.7  
188.8  
188.9  
189.0  
189.1  
189.2  
189.3  
189.4  
189.5  
189.6  
189.7  
189.8  
189.9  
190.0  
190.1  
190.2  
190.3  
190.4  
190.5  
190.6  
190.7  
190.8  
190.9  
191.0  
191.1  
191.2  
191.3  
191.4  
191.5  
191.6  
191.7  
191.8  
191.9  
192.0  
192.1  
192.2  
192.3  
192.4  
192.5  
192.6  
192.7  
192.8  
192.9  
193.0  
193.1  
193.2  
193.3  
193.4  
193.5  
193.6  
193.7  
193.8  
193.9  
194.0  
194.1  
194.2  
194.3  
194.4  
194.5  
194.6  
194.7  
194.8  
194.9  
195.0  
195.1  
195.2  
195.3  
195.4  
195.5  
195.6  
195.7  
195.8  
195.9  
196.0  
196.1  
196.2  
196.3  
196.4  
196.5  
196.6  
196.7  
196.8  
196.9  
197.0  
197.1  
197.2  
197.3  
197.4  
197.5  
197.6  
197.7  
197.8  
197.9  
198.0  
198.1  
198.2  
198.3  
198.4  
198.5  
198.6  
198.7  
198.8  
198.9  
199.0  
199.1  
199.2  
199.3  
199.4  
199.5  
199.6  
199.7  
199.8  
199.9  
200.0

Frequency (MHz) 100.63  
Nucleus <sup>13</sup>C  
Number of Transients 256  
Origin av400  
Pulse Sequence zgpg30  
Receiver Gain 32768.00  
SW(cyclical) (Hz) 26178.01  
Solvent CHLORO  
FORM-d  
Spectrum Offset (Hz) 10021.29  
Sweep Width (Hz) 39  
Temperature (degree C) 27.000

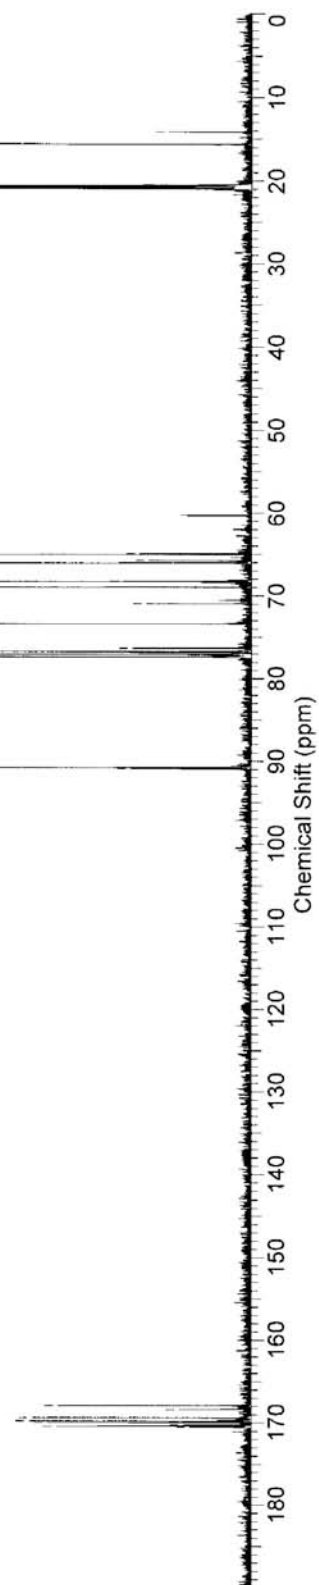

Frequency (MHz) 400.20  
 Nucleus 1H  
 Number of Transients 16  
 Origin av400  
 Pulse Sequence zg60  
 Receiver Gain 40.30  
 SW(cyclical) (Hz) 8278.15  
 Solvent CHLOROFORM-d  
 Spectrum Offset (Hz) 2468.5974  
 Sweep Width (Hz) 8277.89  
 Temperature (degree C) 27.000

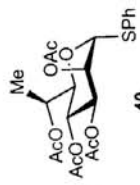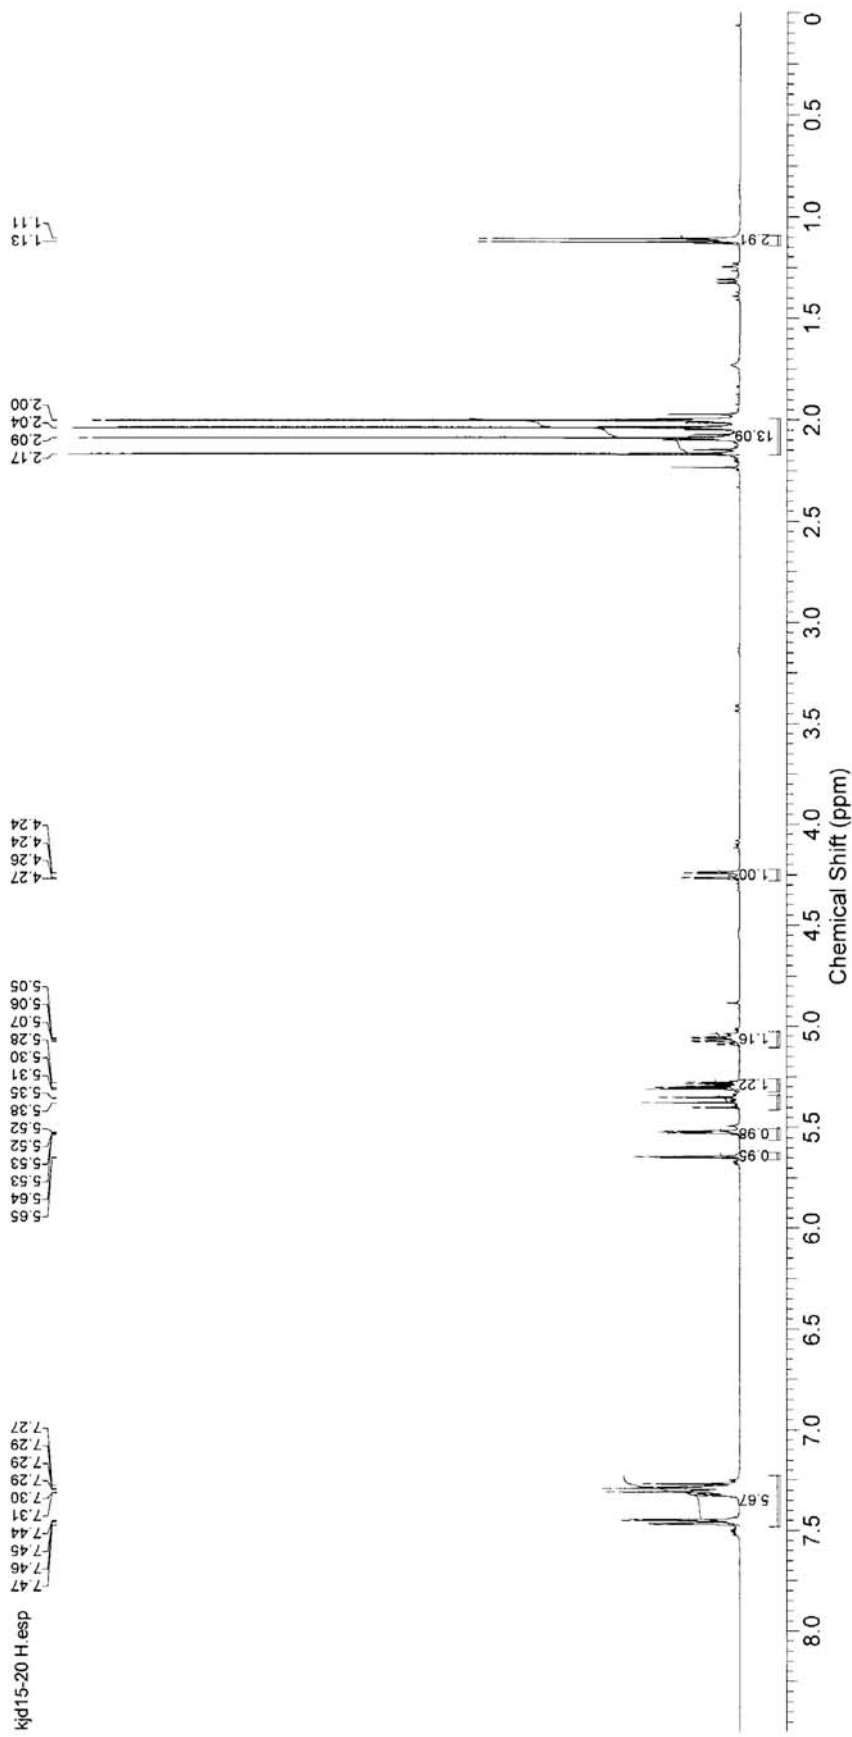

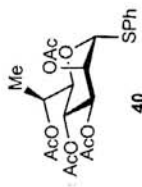

40

kjd15-20 C.esp

170.5  
170.0  
169.9  
169.6

132.4  
131.5  
129.2  
127.9

85.8  
77.4  
77.1  
76.7  
72.5  
70.9  
69.6  
66.3  
65.7

21.0  
20.9  
20.6  
15.8

Frequency (MHz) 100.63  
Nucleus 13C  
Number of Transients 256  
Origin av400  
Pulse Sequence zgpg30  
Receiver Gain 32768.00  
SW(cyclical) (Hz) 26178.01  
Solvent CHLORO  
FORM-d  
Spectrum Offset (Hz) 10021.29  
39  
Sweep Width (Hz) 26177.21  
Temperature (degree C) 27.000

Chemical Shift (ppm)

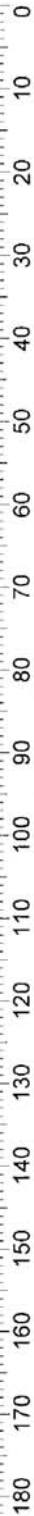



Frequency (MHz) 400.20  
 Nucleus 1H  
 Number of Transients 16  
 Origin av400  
 Pulse Sequence zg60  
 Receiver Gain 32.00  
 SW(cyclical) (Hz) 8278.15  
 Solvent MeOD  
 Spectrum Offset (Hz) 2471.3989  
 Sweep Width (Hz) 8277.89  
 Temperature (degree C) 27.000

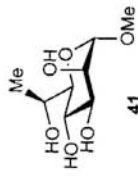

kjd15-66 H.esp

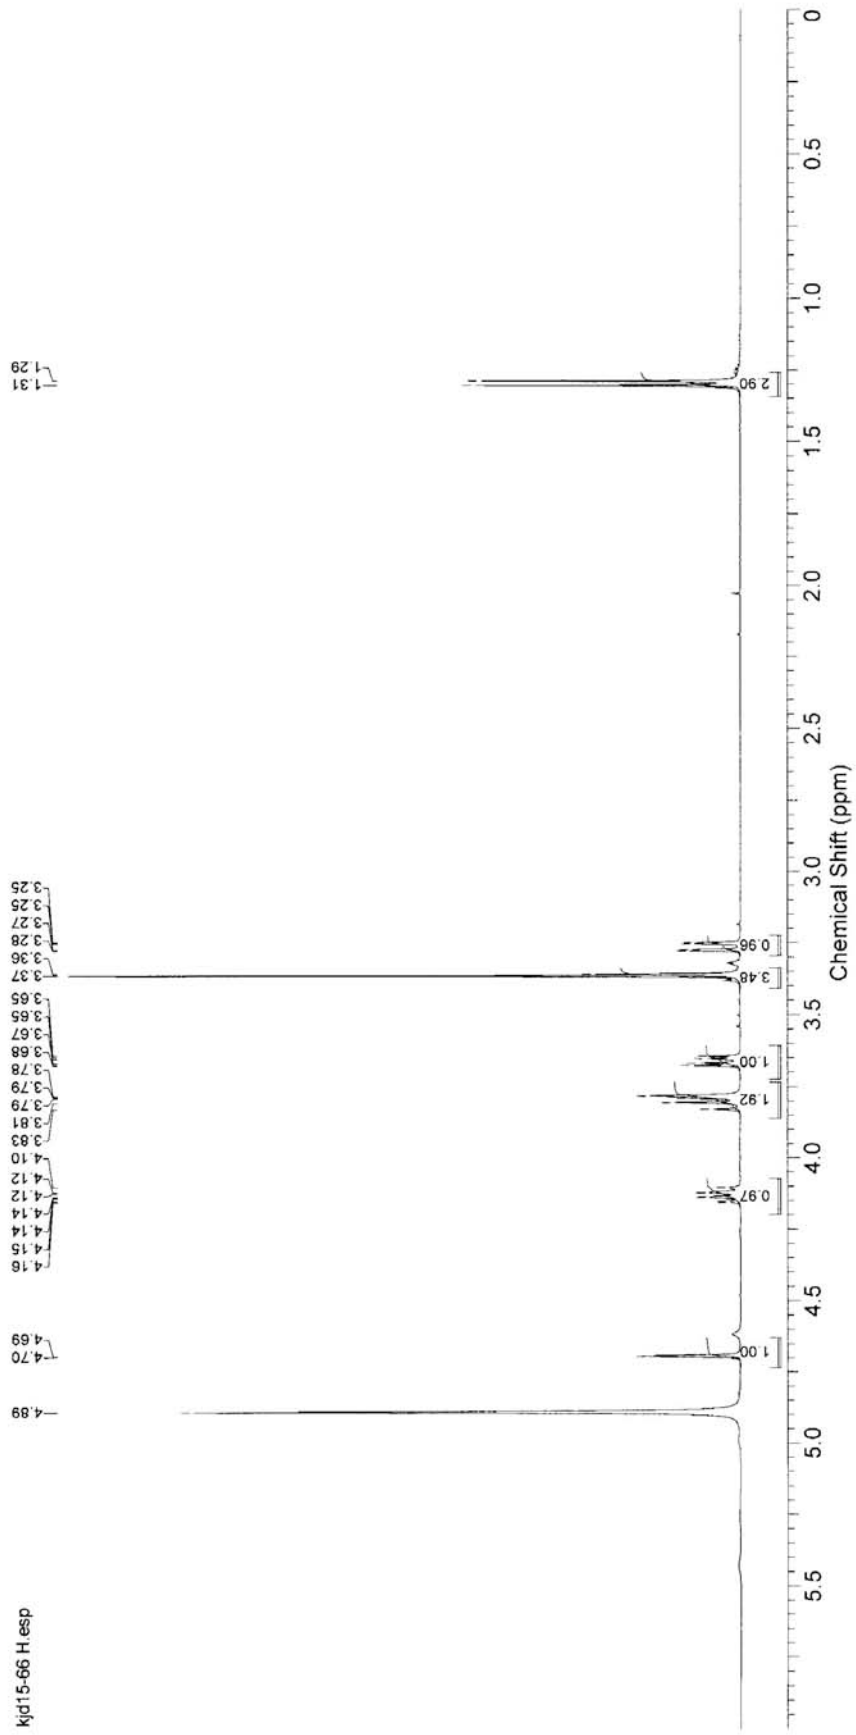

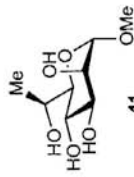

Jan11-2008-50\_004001r

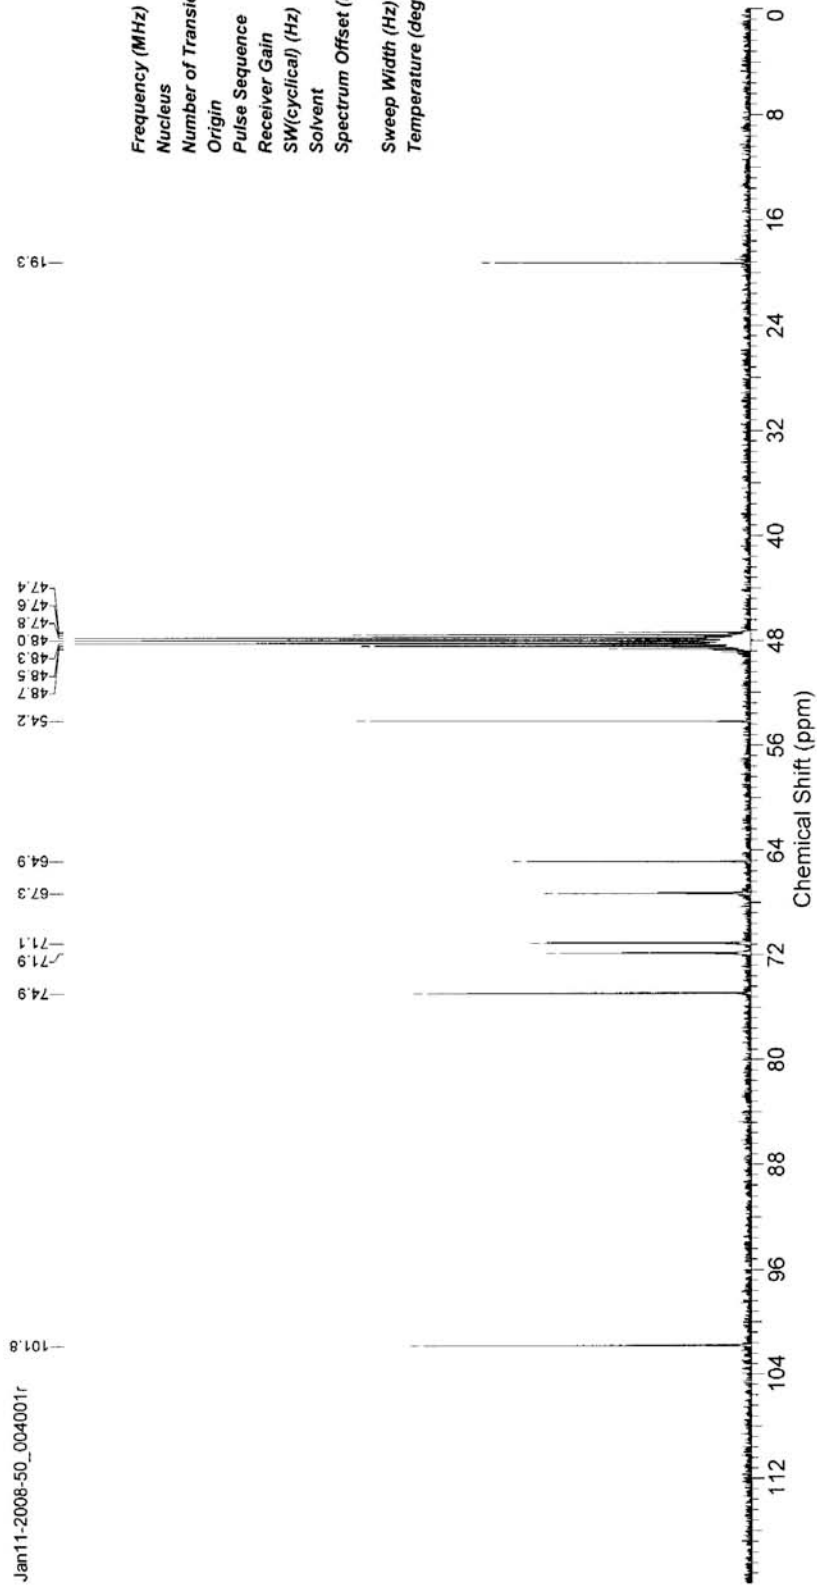

Frequency (MHz) 100.63  
 Nucleus 13C  
 Number of Transients 256  
 Origin av400  
 Pulse Sequence zgpg30  
 Receiver Gain 32768.00  
 SW(cyclical) (Hz) 26178.01  
 Solvent MeOD  
 Spectrum Offset (Hz) 10063.05  
 Sweep Width (Hz) 26177.21  
 Temperature (degree C) 27.000

Frequency (MHz) 500.30  
 Nucleus 1H  
 Number of Transients 16  
 Origin avc500  
 Pulse Sequence zg30  
 Receiver Gain 4.00  
 SW(cyclical) (Hz) 10330.58  
 Solvent CHLOROFORM-d  
 Spectrum Offset (Hz) 3065.5417  
 Sweep Width (Hz) 10330.26  
 Temperature (degree C) 27.000

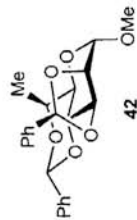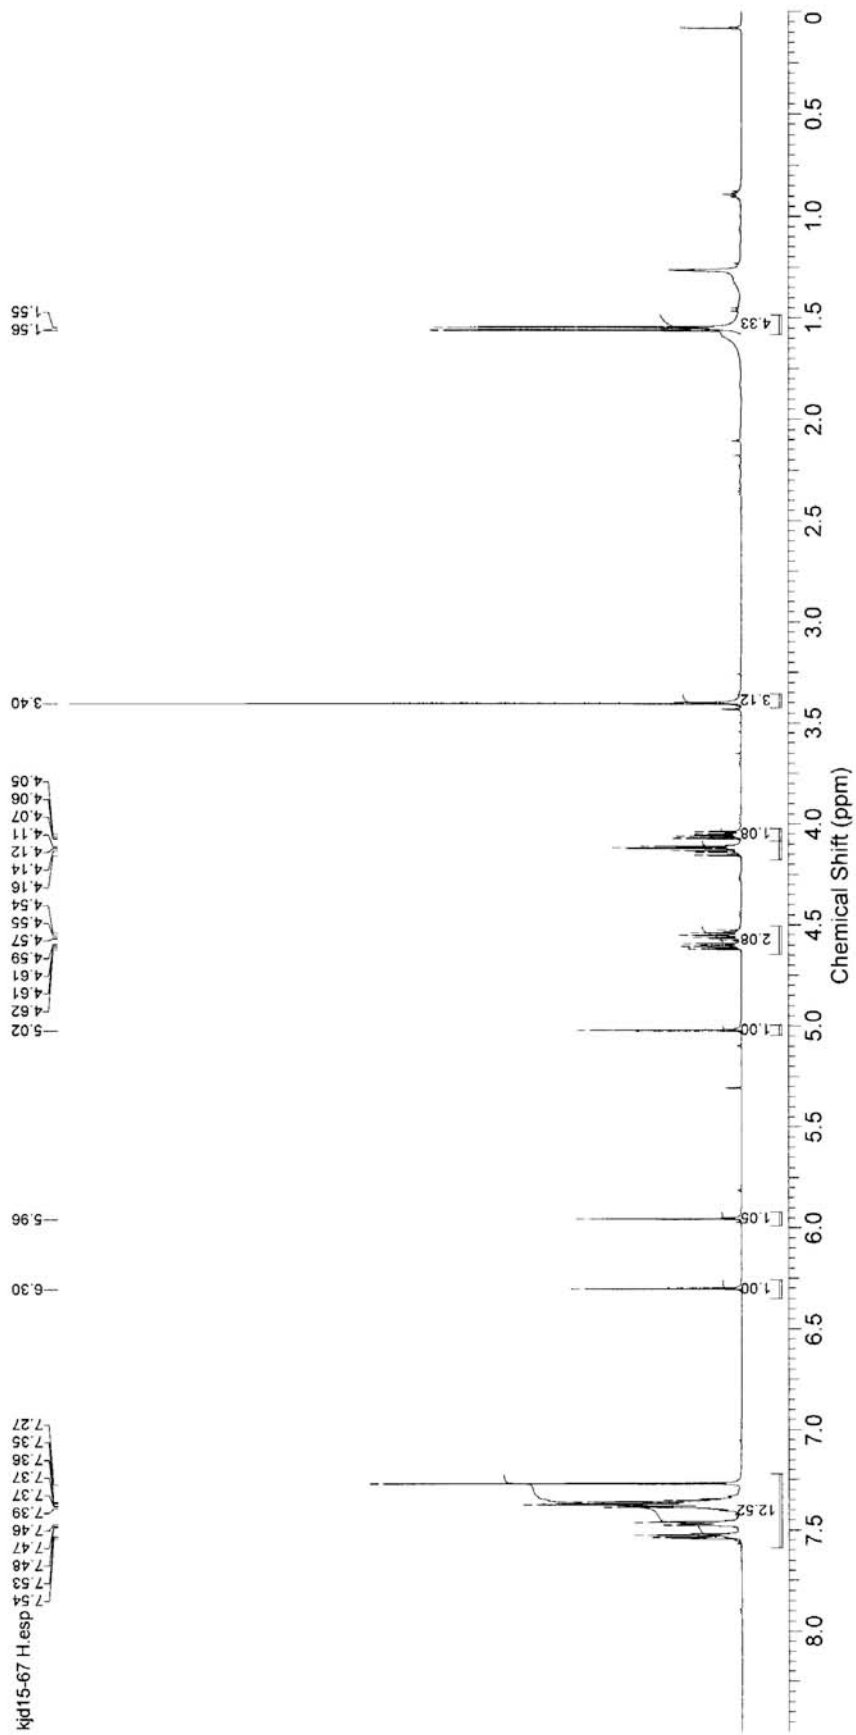

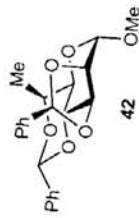

kjd15-67 C.esp

129.1  
129.0  
128.4  
128.2  
126.4  
126.0

137.5  
138.6

103.0  
98.7  
94.2

77.2  
77.0  
76.7  
76.5  
75.1  
70.9  
70.5

62.3  
55.1

11.5

Frequency (MHz) 125.80  
Nucleus <sup>13</sup>C  
Number of Transients 1024  
Origin avc500  
Pulse Sequence zpgg30  
Receiver Gain 912.00  
SW(cyclical) (Hz) 31250.00  
Solvent CHLORO  
FORM-d  
Spectrum Offset (Hz) 12571.30  
47  
Sweep Width (Hz) 31249.05  
Temperature (degree C) 27.000

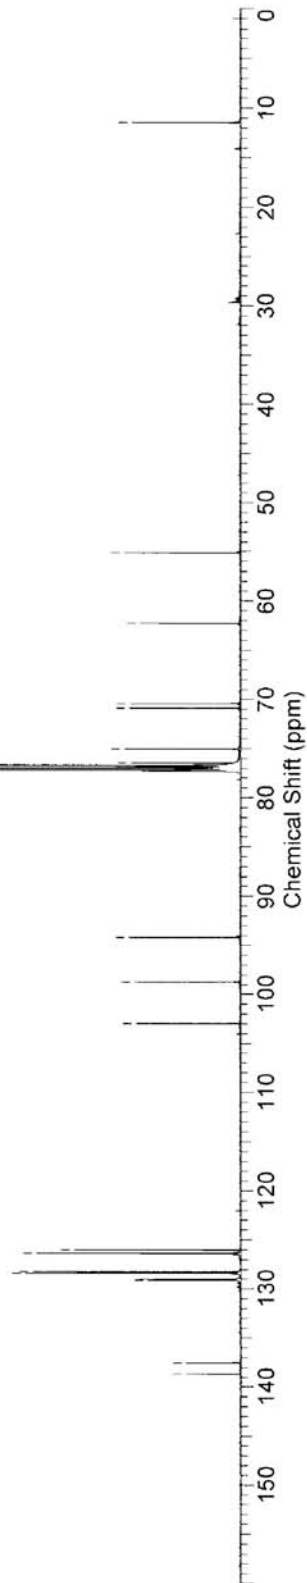

Frequency (MHz) 500.30  
 Nucleus 1H  
 Number of Transients 16  
 Origin avc500  
 Pulse Sequence zg30  
 Receiver Gain 4.00  
 SW(cyclical) (Hz) 10330.58  
 Solvent CHLOROFORM-d  
 Spectrum Offset (Hz) 3065.5417  
 Sweep Width (Hz) 10330.26  
 Temperature (degree C) 27.000

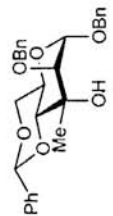

44

kjd15-70 H.esp  
 7.52  
7.51  
7.50  
7.37  
7.36  
7.35  
7.34  
7.33  
7.32  
7.30  
7.27

4.94  
4.81  
4.79  
4.64  
4.62  
4.58  
4.57  
4.56  
4.54  
4.32  
4.31  
4.30  
4.29  
4.12  
4.11  
3.86  
3.84  
3.82  
3.79  
3.77  
3.66  
3.44

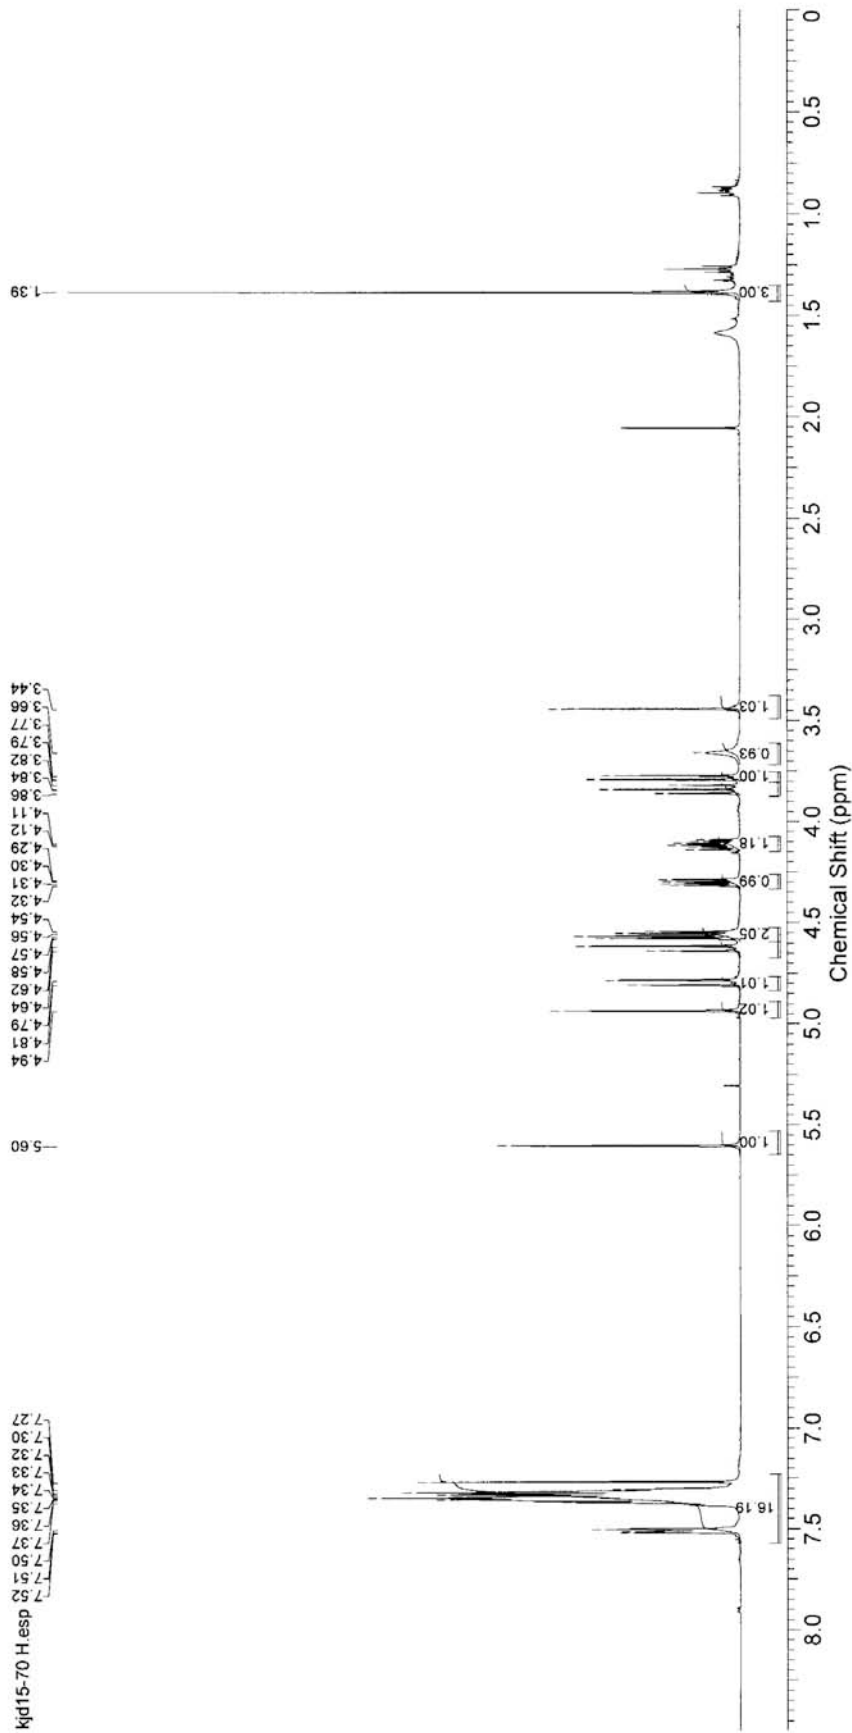

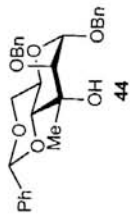

kd15-70 C.esf  
 126.2  
 128.0  
 128.1  
 128.2  
 128.5  
 128.6  
 128.8  
 128.8  
 136.3  
 137.1  
 137.1

102.0  
 97.4

80.3  
 79.9  
 77.3  
 77.0  
 76.7  
 73.6  
 71.3  
 69.8  
 69.0  
 60.1

21.2

Frequency (MHz) 125.80  
 Nucleus <sup>13</sup>C  
 Number of Transients 256  
 Origin avc500  
 Pulse Sequence zpgg30  
 Receiver Gain 1820.00  
 SW(cyclical) (Hz) 31250.00  
 Solvent CHLORO  
 FORM-d  
 Spectrum Offset (Hz) 12571.30  
 47  
 Sweep Width (Hz) 31249.05  
 Temperature (degree C) 27.000

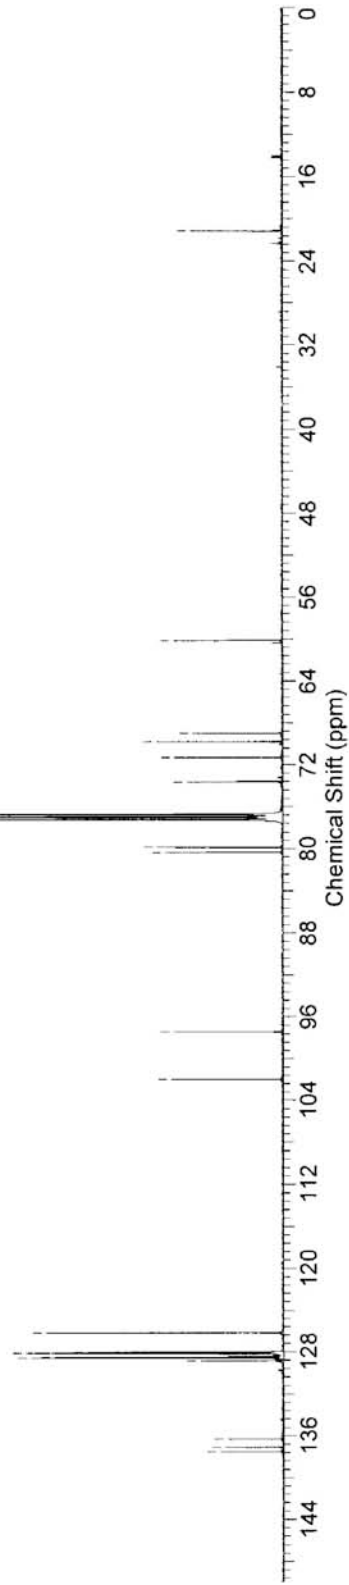

Frequency (MHz) 400.20  
 Nucleus 1H  
 Number of Transients 16  
 Origin av400  
 Pulse Sequence zg60  
 Receiver Gain 32.00  
 SW(cyclical) (Hz) 8278.15  
 Solvent CHLOROFORM-d  
 Spectrum Offset (Hz) 2468.5974  
 Sweep Width (Hz) 8277.89  
 Temperature (degree C) 21.500

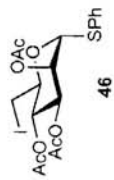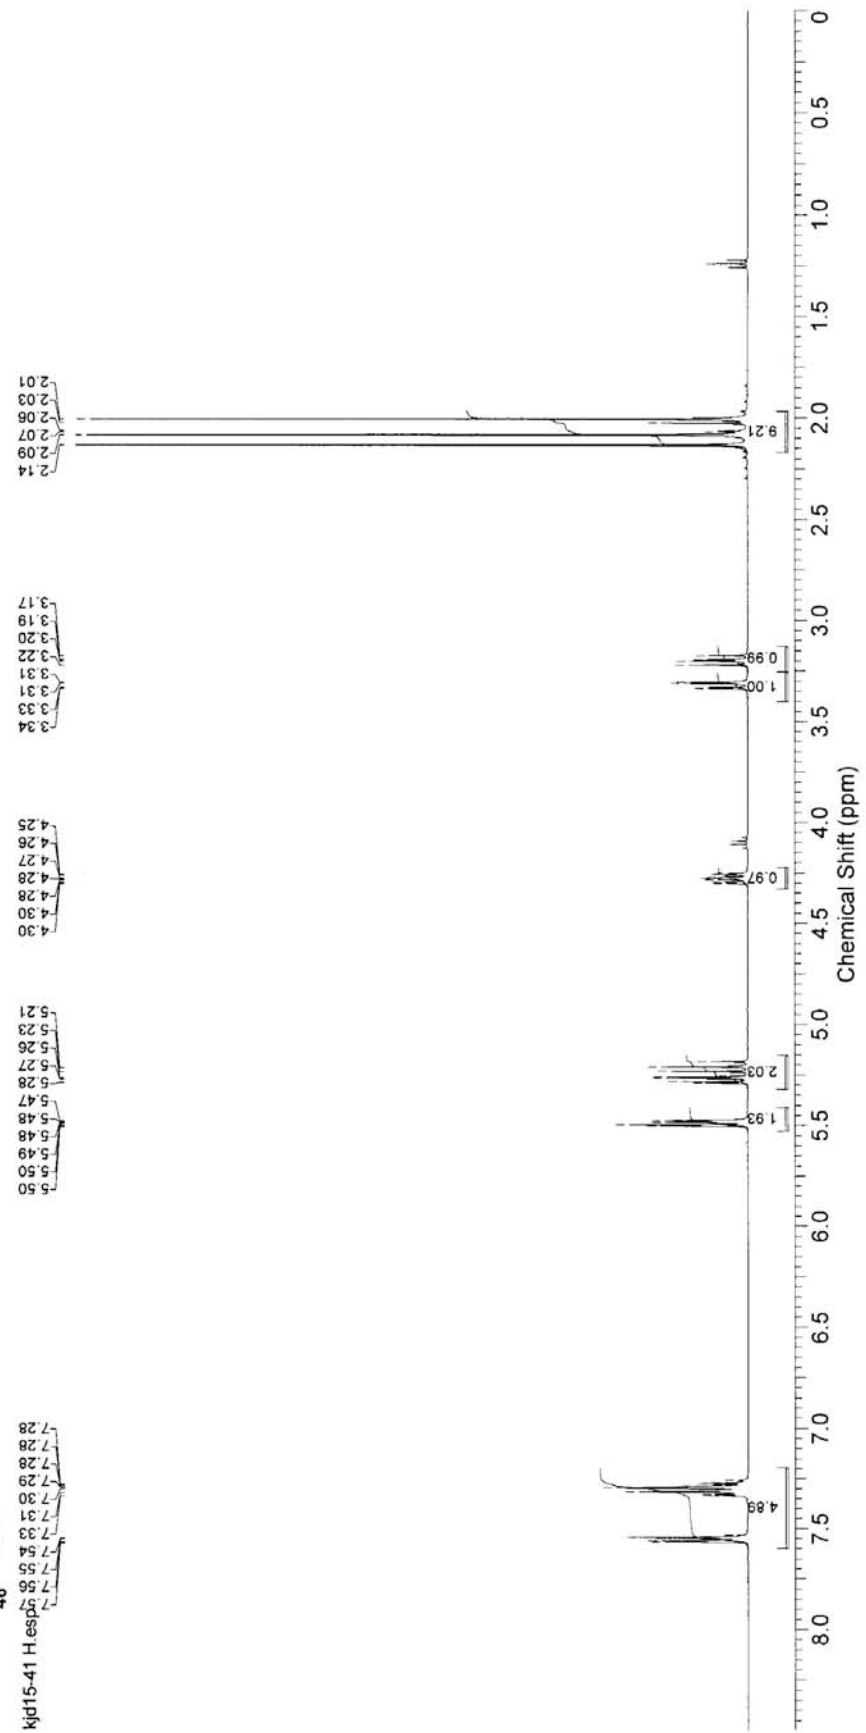

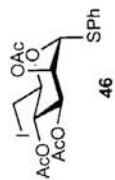

kjd15-41 C.esp  
169.7  
169.8  
169.8

132.7  
132.1  
129.2  
128.1

86.0  
77.4  
77.1  
76.8  
71.1  
71.0  
70.1  
68.9

20.9  
20.8  
20.6

3.5

Frequency (MHz) 100.63  
Nucleus 13C  
Number of Transients 256  
Origin av400  
Pulse Sequence zgpg30  
Receiver Gain 32768.00  
SW(cyclical) (Hz) 26178.01  
Solvent CHLORO  
FORM-d  
Spectrum Offset (Hz) 10021.29  
Sweep Width (Hz) 39  
Sweep Width (degree C) 26177.21  
Temperature (degree C) 22.000

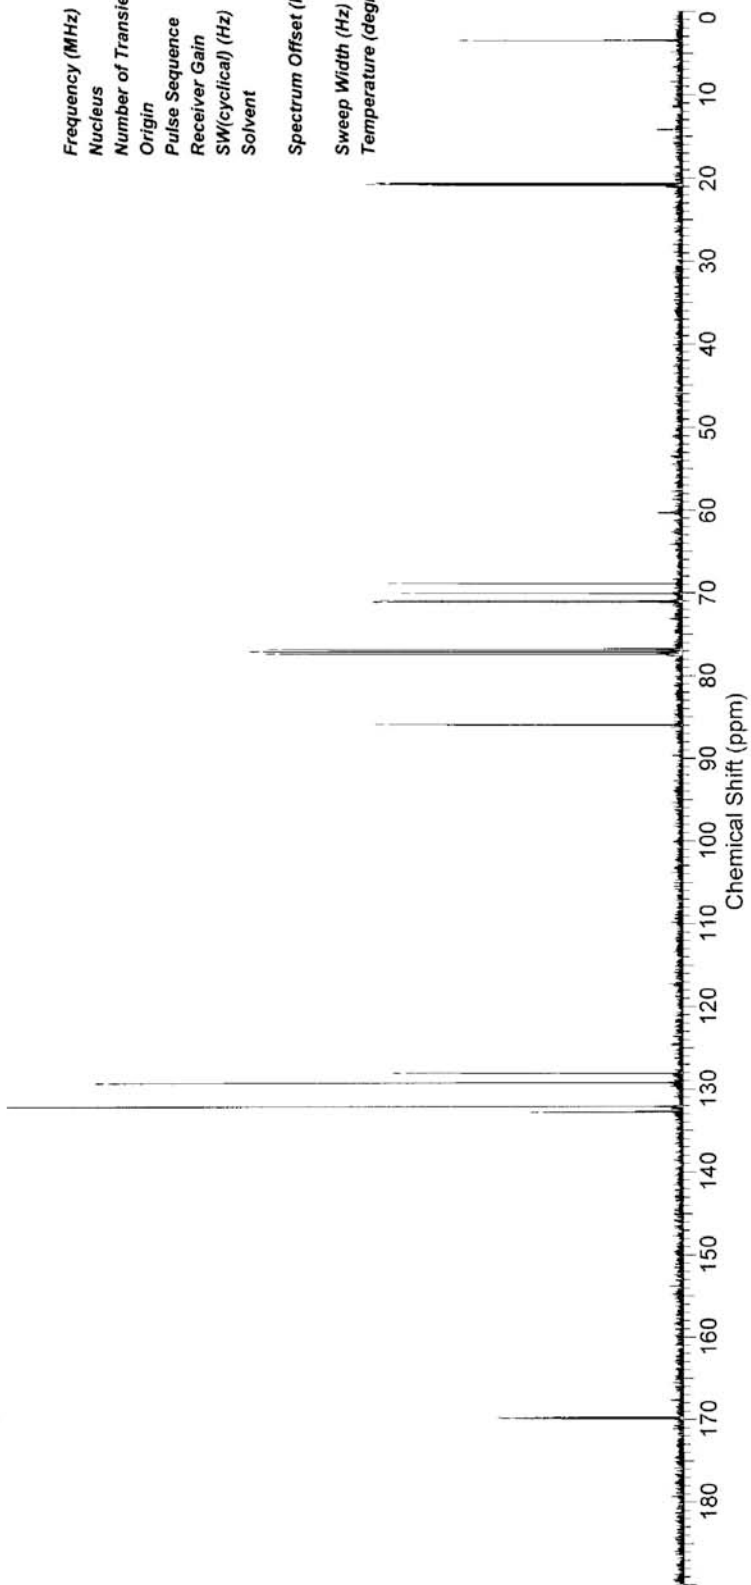



Frequency (MHz) 400.20  
 Nucleus <sup>1</sup>H  
 Number of Transients 16  
 Origin av400  
 Pulse Sequence zg60  
 Receiver Gain 35.90  
 SW(cyclical) (Hz) 8278.15  
 Solvent CHLOROFORM-d  
 Spectrum Offset (Hz) 2468.5974  
 Sweep Width (Hz) 8277.89  
 Temperature (degree C) 27.000

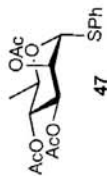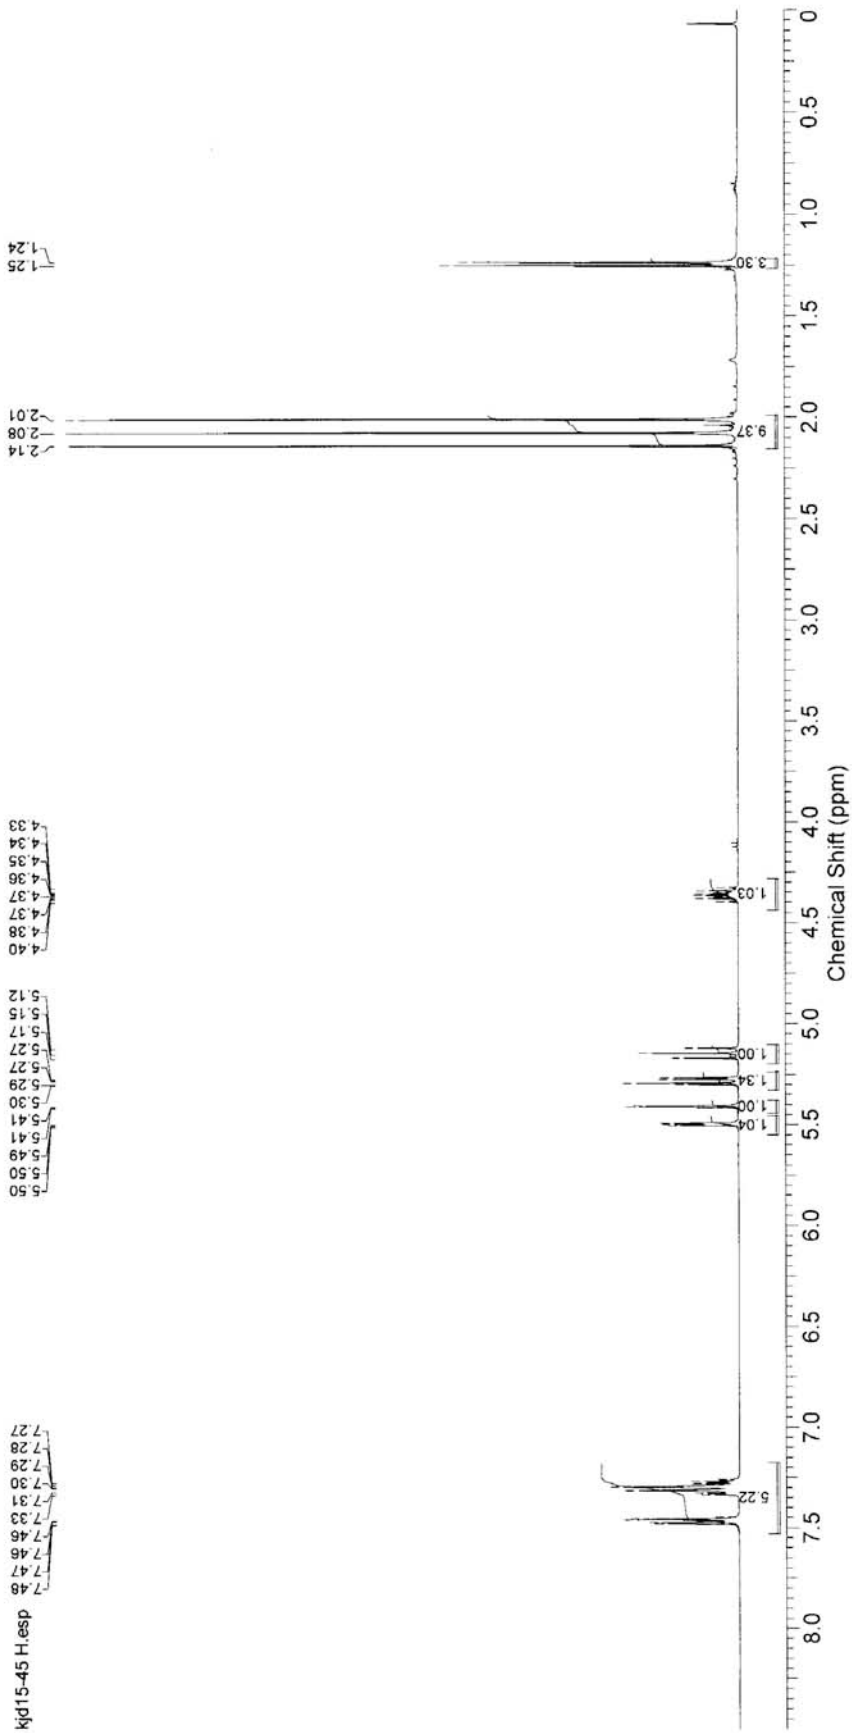

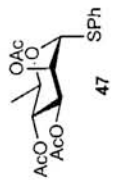

kjd15-45 C. esp  
 170.0  
 169.9

133.2  
 131.8  
 129.2  
 127.9

85.7  
 77.4  
 77.1  
 76.7  
 71.3  
 71.1  
 69.4  
 67.7

20.9  
 20.8  
 20.7  
 17.3

**Frequency (MHz)** 100.63  
**Nucleus** 13C  
**Number of Transients** 256  
**Origin** av400  
**Pulse Sequence** zgpg30  
**Receiver Gain** 32768.00  
**SW(cyclical) (Hz)** 26178.01  
**Solvent** CHLORO  
 FORM-d  
**Spectrum Offset (Hz)** 10021.29  
 39  
**Sweep Width (Hz)** 26177.21  
**Temperature (degree C)** 27.000

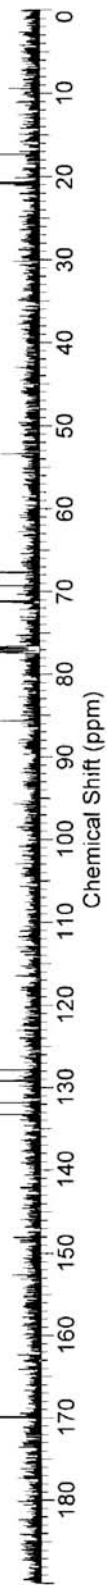

Frequency (MHz) 499.98  
 Nucleus 1H  
 Number of Transients 16  
 Origin avb500  
 Pulse Sequence zg30  
 Receiver Gain 256.00  
 SW(cyclical) (Hz) 10330.58  
 Solvent CHLOROFORM-d  
 Spectrum Offset (Hz) 2499.9995  
 Sweep Width (Hz) 10330.26  
 Temperature (degree C) 25.729

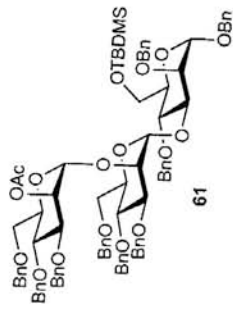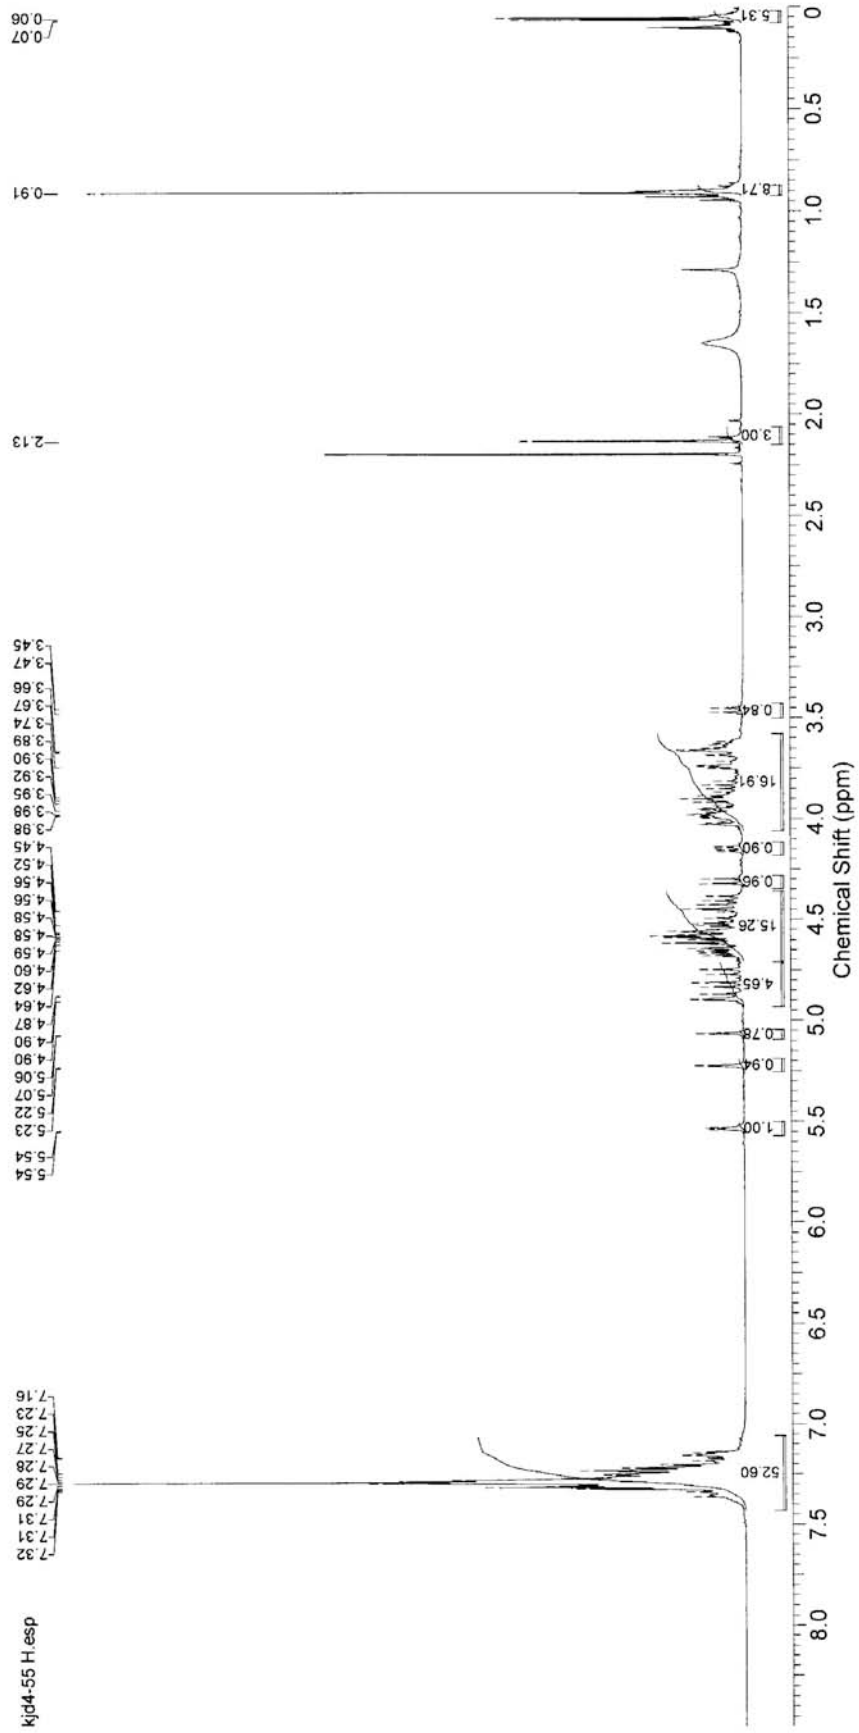

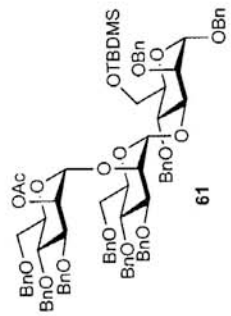

kjd4-55 C. esp

170.1  
138.7  
138.5  
138.4  
128.5  
128.3  
128.2  
128.2  
127.8  
127.7  
127.5  
127.3  
100.9  
99.3  
96.1  
78.1  
77.3  
77.0  
76.8  
74.8  
73.4  
73.2  
72.1  
72.0  
71.9  
68.8  
68.7  
30.9  
25.9  
21.2  
18.3

Frequency (MHz) 125.72  
Nucleus <sup>13</sup>C  
Number of Transients 4096  
Origin avb500  
Pulse Sequence zgpg30  
Receiver Gain 3640.00  
SW(cyclical) (Hz) 31250.00  
Solvent CHLORO  
Spectrum Offset (Hz) 12572.01  
Sweep Width (Hz) 27  
Sweep Width (degree C) 31249.05  
Temperature (degree C) 26.380

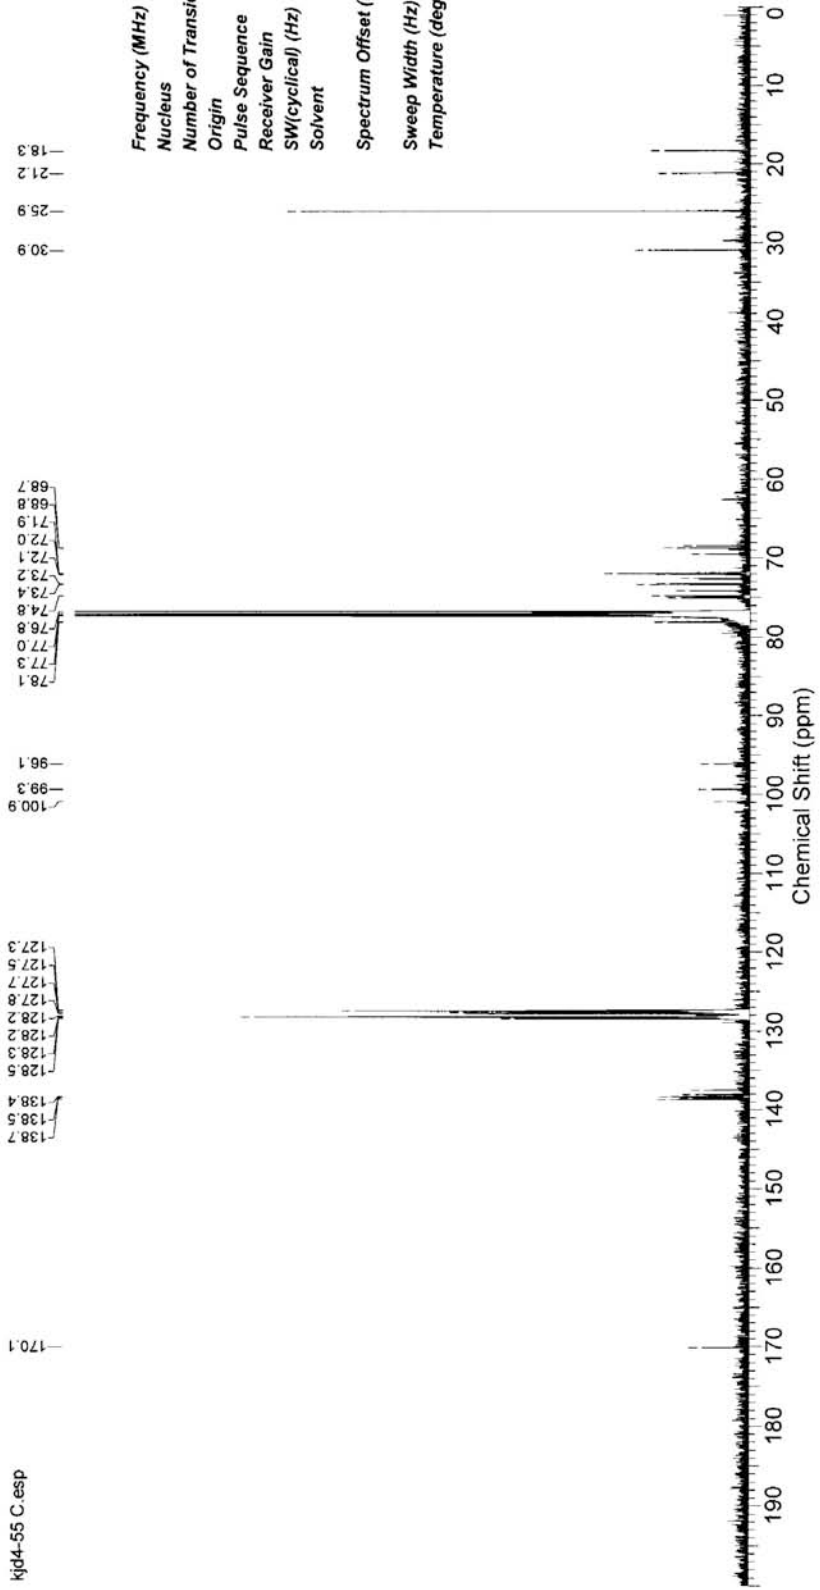



Frequency (MHz) 125.80  
 Nucleus 13C  
 Number of Transients 3072  
 Origin avc500  
 Pulse Sequence zgpg30  
 Receiver Gain 1820.00  
 SW(cyclical) (Hz) 31250.00  
 Solvent DEUTERIUM OXIDE  
 Spectrum Offset (Hz) 12580.1094  
 Sweep Width (Hz) 31249.05  
 Temperature (degree C) 24.970

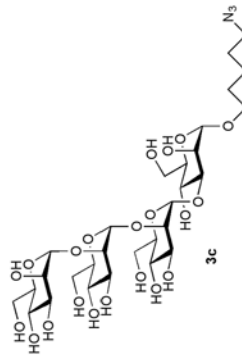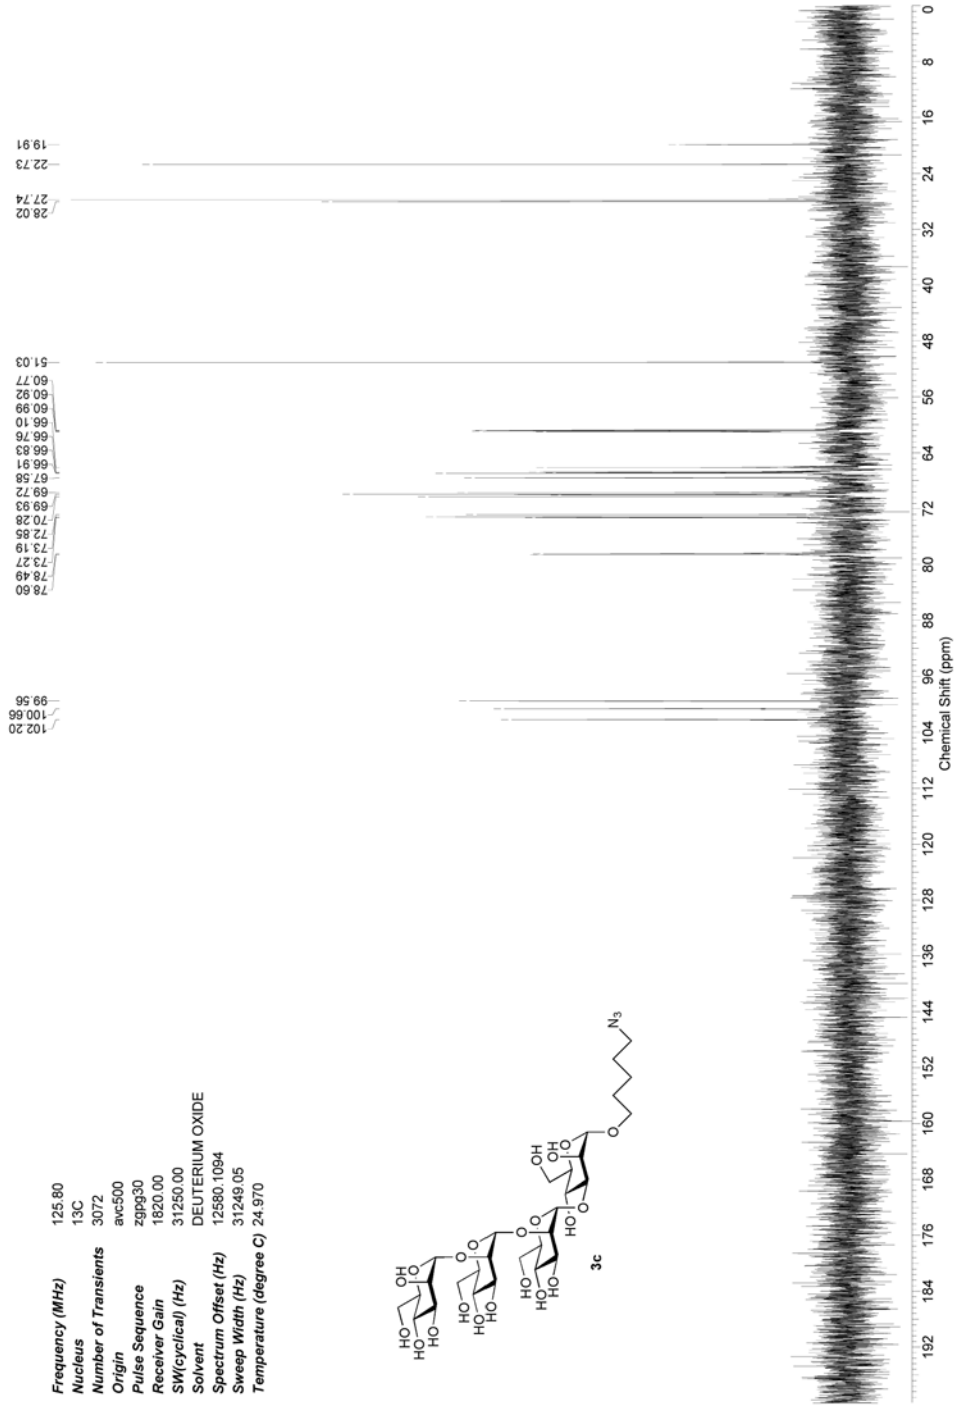

1.21  
1.22  
1.33  
1.36  
1.37  
1.38  
1.52  
1.53  
1.54  
1.56  
1.57  
1.59

3.23  
3.25  
3.26  
3.59  
3.64  
3.65  
3.66  
3.67  
3.68  
3.68  
3.74  
3.78  
3.97  
3.97  
4.07

4.74  
5.00  
5.14  
5.26

Frequency (MHz) 500.30  
Nucleus 1H  
Number of Transients 16  
Origin avc500  
Pulse Sequence zg30  
Receiver Gain 14.20  
SW(cyclical) (Hz) 10330.58  
Solvent DEUTERIUM OXIDE  
Spectrum Offset (Hz) 3089.5557  
Sweep Width (Hz) 10330.26  
Temperature (degree C) 24.970

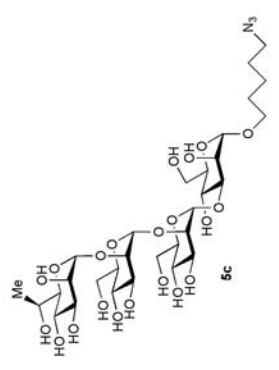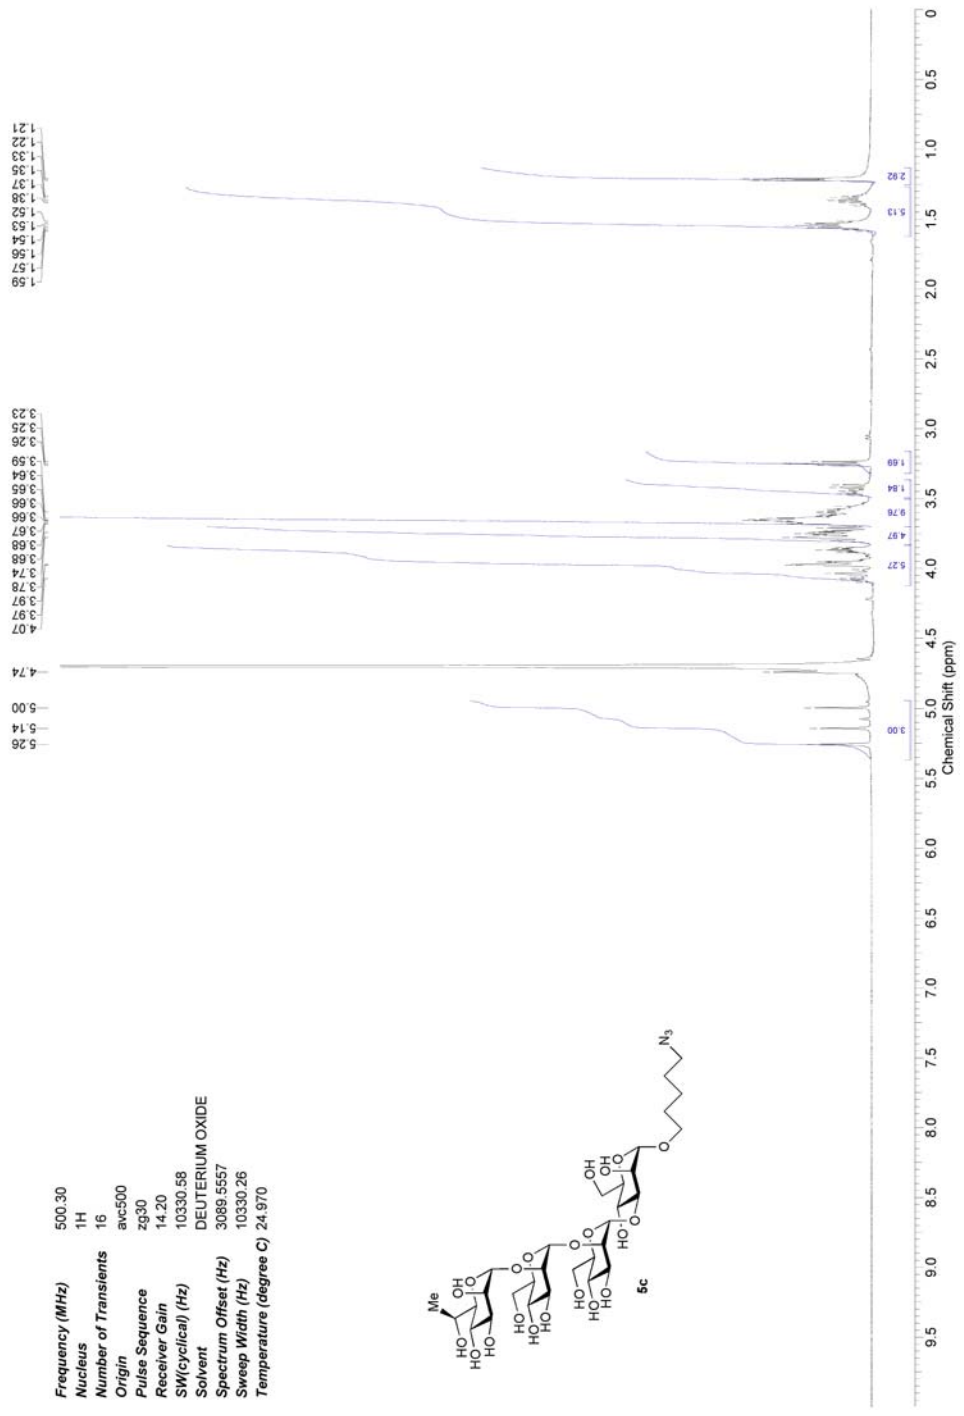

Frequency (MHz) 125.80  
Nucleus <sup>13</sup>C  
Number of Transients 2048  
Origin awc500  
Pulse Sequence zgpg30  
Receiver Gain 1820.00  
SW(cyclical) (Hz) 31250.00  
Solvent DEUTERIUM OXIDE  
Spectrum Offset (Hz) 12580.1084  
Sweep Width (Hz) 31249.05  
Temperature (degree C) 24.970

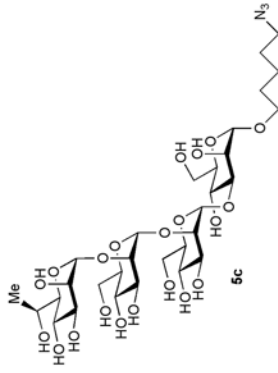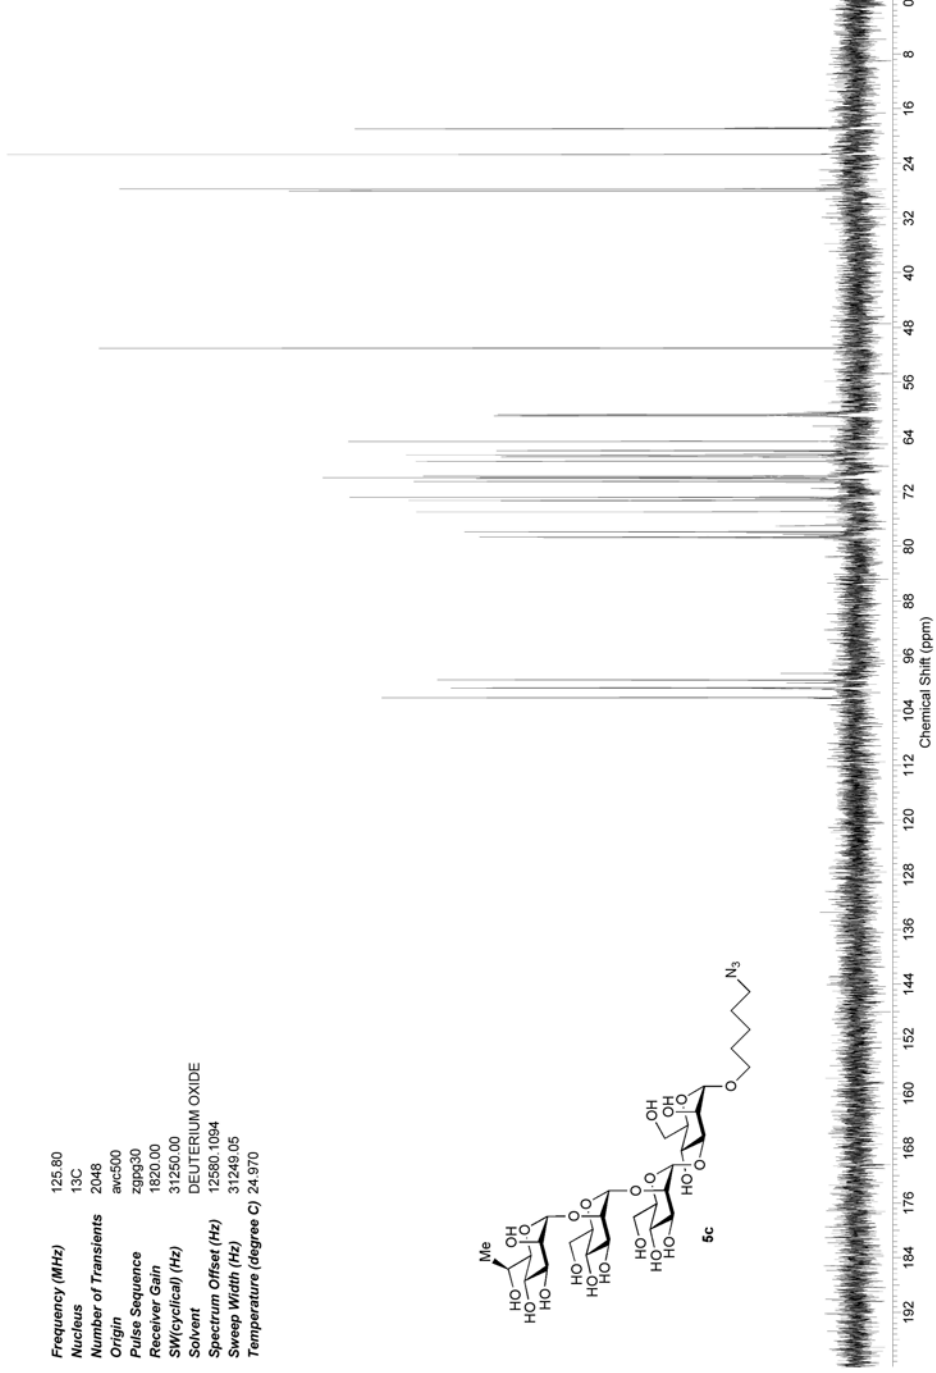



Instrument DQX400  
 Chemist kjd  
 Group bgd  
 kjd16-15

h1acq.au CDC13 {C:NMR} bgdgrp 23

NMR@CHEM.OX

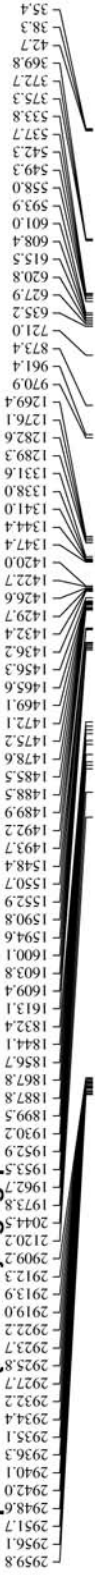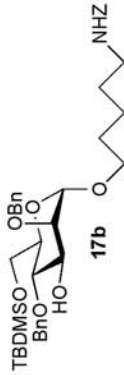

Current Data Parameters  
 NAME Feb27-2008-23  
 EXPNO 1  
 PROCNO 1

F2 - Acquisition Parameters  
 Date\_ 20080228  
 Time 1.39  
 INSTRUM av400  
 PROBD 5 mm QNP 1H/13  
 PULPROG zg60  
 TD 65536  
 SOLVENT CDC13  
 NS 16  
 DS 2  
 SWH 8278.146 Hz  
 FIDRES 0.126314 Hz  
 AQ 3.9584243 sec  
 RG 32  
 DW 60.400 usec  
 DE 7.50 usec  
 TE 300.0 K  
 DI 1.0000000 sec

==== CHANNEL f1 =====  
 NUC1 1H  
 P1 9.00 usec  
 PL1 0.00 dB  
 SFO1 400.2024714 MHz

F2 - Processing parameters  
 SI 32768  
 SF 400.2000028 MHz  
 WDW EM  
 SSB 0  
 LB 0.30 Hz  
 GB 0  
 PC 1.00

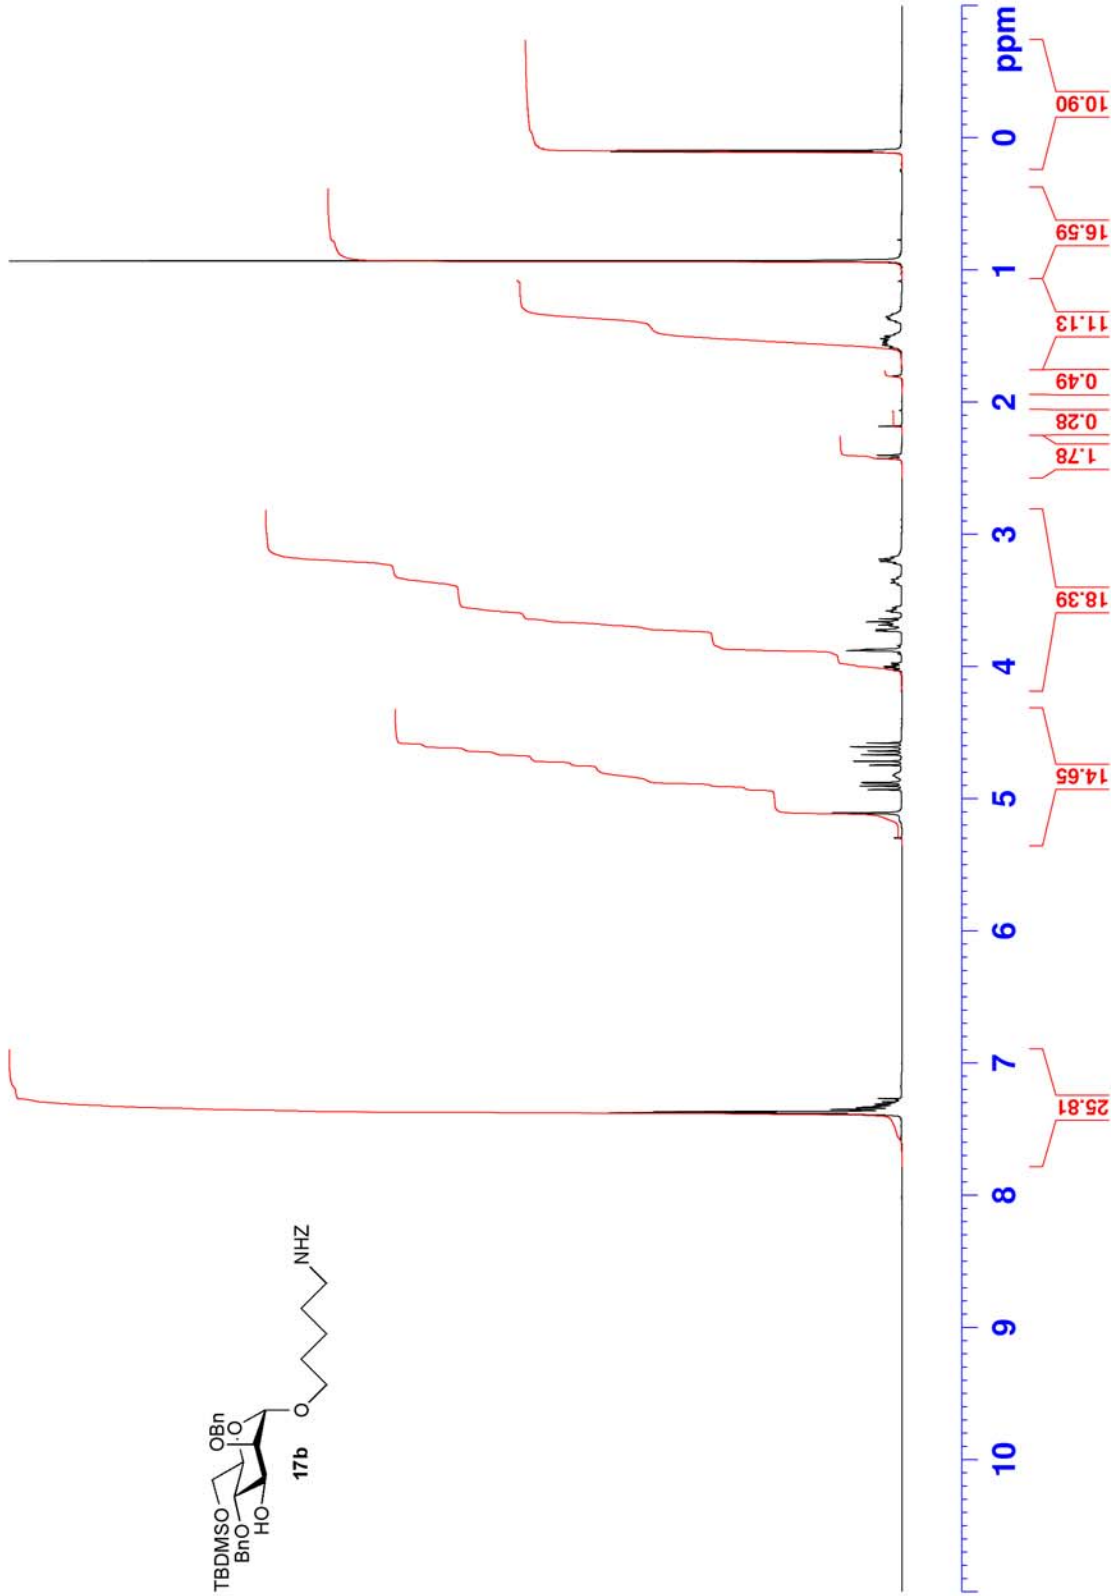

Instrument DQX400  
 Chemist kjd  
 Group bgd  
 kjd16-15  
 c13acq.au CDCI3 {C:\NMR} bgdgrp 23

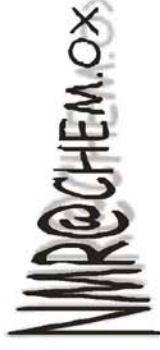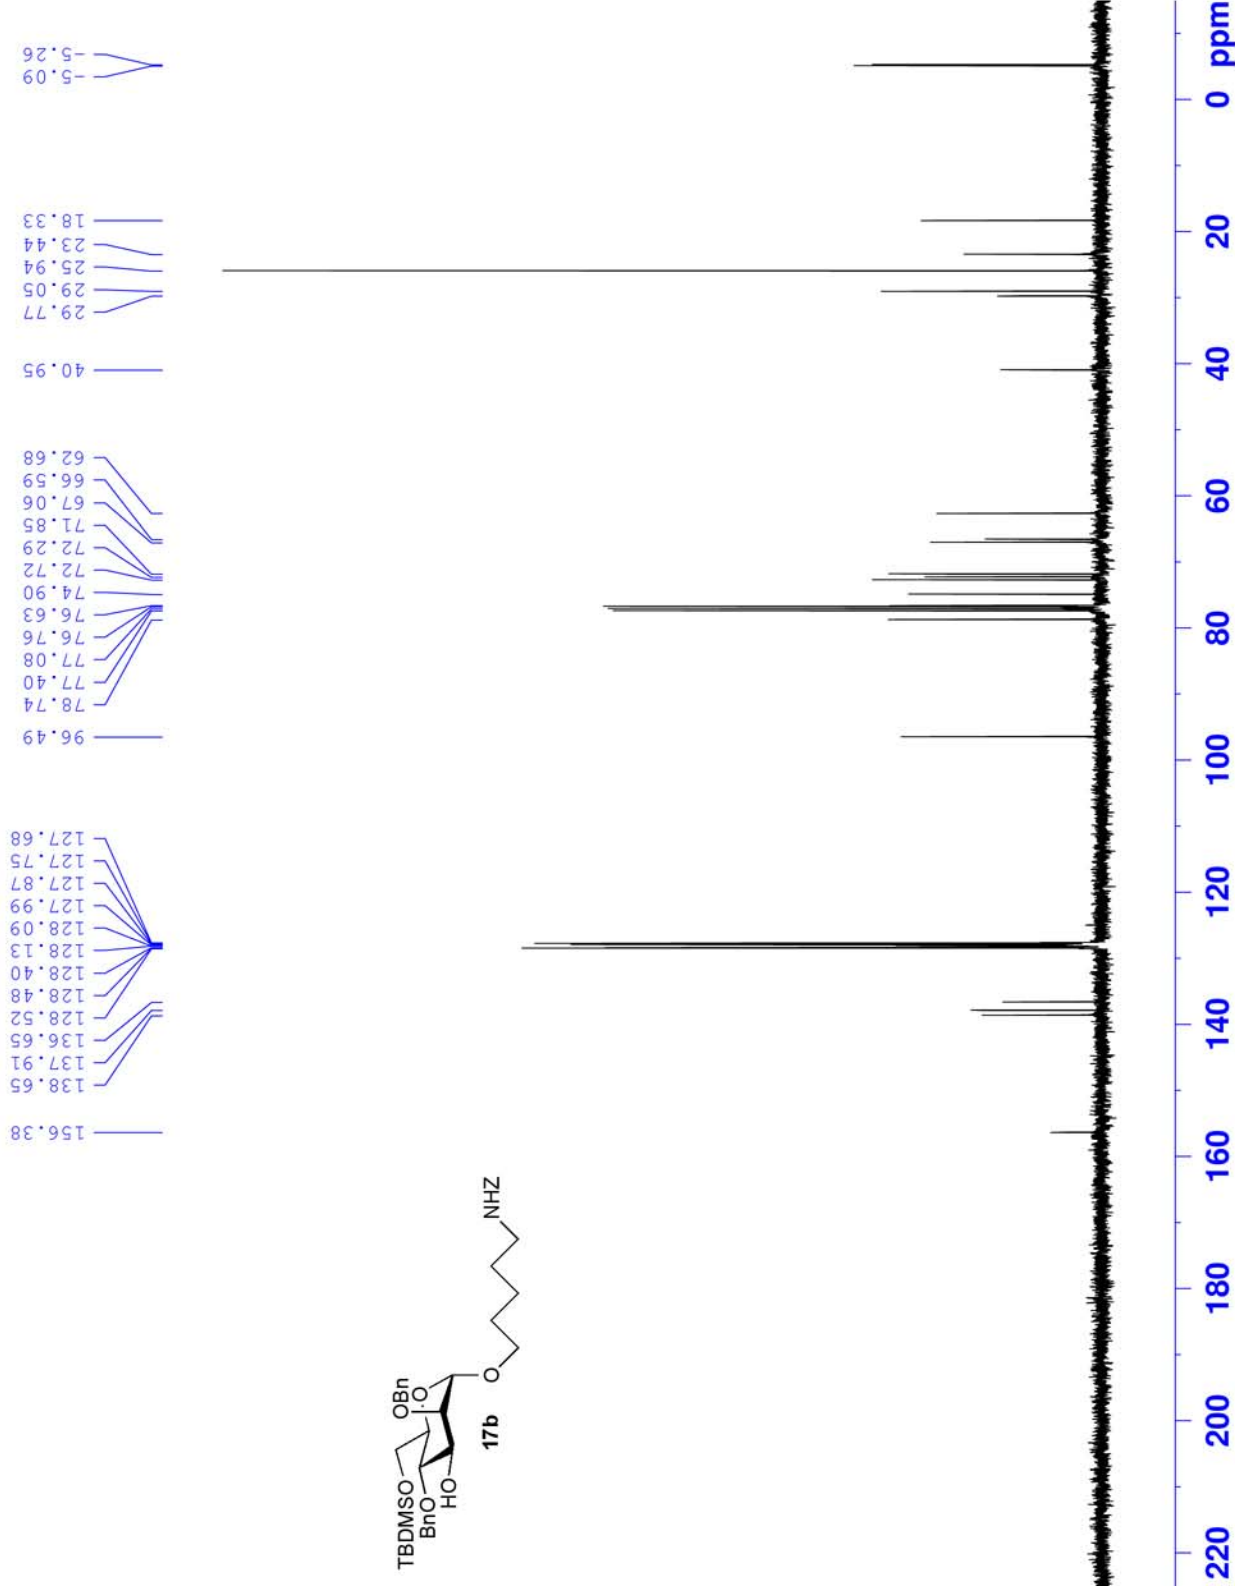

Current Data Parameters  
 NAME Feb27-2008-23  
 EXPNO 4  
 PROCNO 1

F2 - Acquisition Parameters  
 Date\_ 20080228  
 Time 1.55  
 INSTRUM av400  
 PROBHD 5 mm QNP 1H/13  
 PULPROG zgpg30  
 TD 32768  
 SOLVENT CDCl3  
 NS 256  
 DS 4  
 SWH 26178.010 Hz  
 FIDRES 0.798889 Hz  
 AQ 0.6259188 sec  
 RG 32768  
 DW 19.100 usec  
 DE 7.50 usec  
 TE 300.0 K  
 D1 1.0000000 sec  
 d11 0.0300000 sec  
 DELTA 0.89999998 sec  
 TD0 1

==== CHANNEL f1 =====  
 NUC1 13C  
 P1 9.50 usec  
 PL1 0.00 dB  
 SFO1 100.6403931 MHz

==== CHANNEL f2 =====  
 CPDPRG2 waltz16  
 NUC2 1H  
 PCPD2 80.00 usec  
 PL12 19.00 dB  
 PL13 25.00 dB  
 PL2 0.00 dB  
 SFO2 400.2016008 MHz

F2 - Processing parameters  
 SI 32768  
 SF 100.6303718 MHz  
 WDW EM  
 SSB 0  
 LB 1.00 Hz  
 GB 0  
 PC 1.40

Instrument DPX200  
 Chemist kjd  
 Group bgd  
 kjd16-12  
 h1acq.au CDC13 {C:NMR} bgdgrp 2

NMR@CHEM.OX

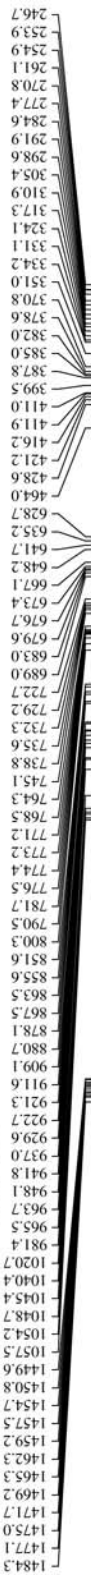

Current Data Parameters  
 NAME Feb20-2008-2  
 EXPNO 1  
 PROCNO 1

F2 - Acquisition Parameters  
 Date\_ 20080220  
 Time 18.30  
 INSTRUM dpx200  
 PROBHD 5 mm Dual 13C/  
 PULPROG zg60  
 TD 16384  
 SOLVENT CDC13  
 NS 16  
 DS 2  
 SWH 2796.421 Hz  
 FIDRES 0.170680 Hz  
 AQ 2.9295092 sec  
 RG 90.5  
 DW 178.800 usec  
 DE 6.00 usec  
 TE 300.0 K  
 D1 1.0000000 sec

==== CHANNEL f1 =====  
 NUC1 1H  
 P1 7.80 usec  
 PL1 -3.00 dB  
 SFO1 200.1310007 MHz

F2 - Processing parameters  
 SI 32768  
 SF 200.1300125 MHz  
 WDW EM  
 SSB 0  
 LB 0.30 Hz  
 GB 0  
 PC 1.00

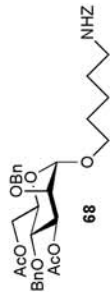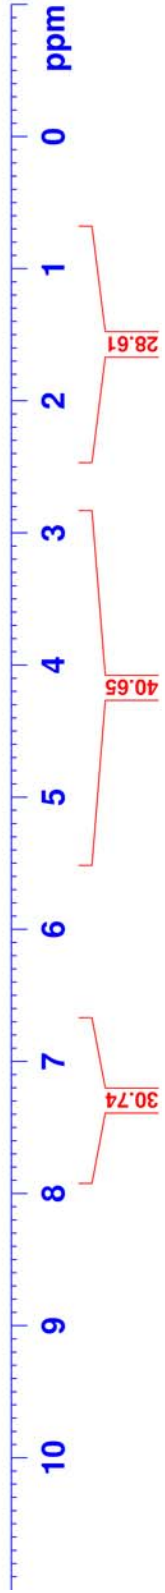

Instrument DQX400  
 Chemist kjd  
 Group bgd  
 kjd16-12  
 c13acq.au CDCI3 {C:\NMR} bgdgrp 52

**NMR@CHEM.OX**

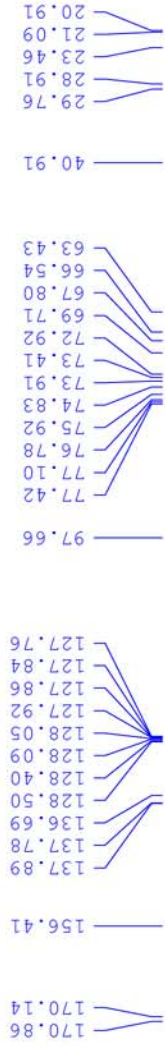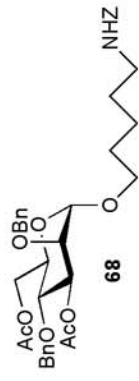

Current Data Parameters  
 NAME Feb21-2008-52  
 EXPNO 4  
 PROCNO 1

F2 - Acquisition Parameters  
 Date\_ 20080221  
 Time 11.54  
 INSTRUM av400  
 PROBHD 5 mm QNP 1H/13  
 PULPROG zgpg30  
 TD 32768  
 SOLVENT CDCl3  
 NS 256  
 DS 4  
 SWH 26178.010 Hz  
 FIDRES 0.798889 Hz  
 AQ 0.6259188 sec  
 RG 32768  
 DW 19.100 usec  
 DE 7.50 usec  
 TE 300.0 K  
 D1 1.00000000 sec  
 d11 0.03000000 sec  
 DELTA 0.89999998 sec  
 TD0 1

==== CHANNEL f1 =====  
 NUC1 13C  
 P1 9.50 usec  
 PL1 0.00 dB  
 SFO1 100.6403931 MHz

==== CHANNEL f2 =====  
 CPDPRG2 waltz16  
 NUC2 1H  
 P1 80.00 usec  
 PL1 19.00 dB  
 PL2 25.00 dB  
 PL3 0.00 dB  
 SFO2 400.2016008 MHz

F2 - Processing parameters  
 SI 32768  
 SF 100.6303718 MHz  
 WDW EM  
 SSB 0  
 LB 1.00 Hz  
 GB 0  
 PC 1.40

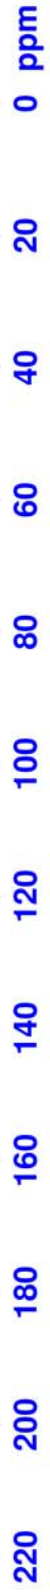

Instrument DQX400  
 Chemist kjd  
 Group bgd  
 kjd16-14p  
 h1acq.au CDC13 {C:NMR} bgdgrp 22

NMR@CHEM.OX

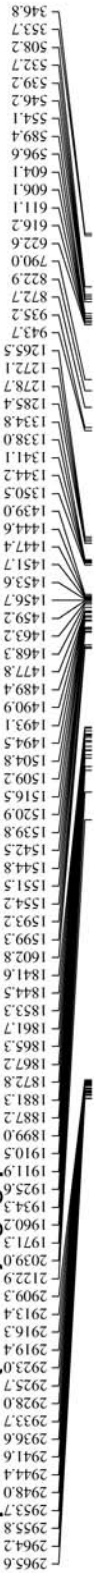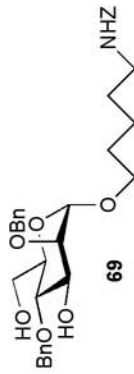

Current Data Parameters  
 NAME Feb27-2008-22  
 EXPNO 1  
 PROCNO 1

F2 - Acquisition Parameters  
 Date\_ 20080228  
 Time 1.13  
 INSTRUM av400  
 PROBHD 5 mm QNP 1H/13  
 PULPROG zg60  
 TD 65536  
 SOLVENT CDC13  
 NS 16  
 DS 2  
 SWH 8278.146 Hz  
 FIDRES 0.126314 Hz  
 AQ 3.9584243 sec  
 RG 90.5  
 DW 60.400 usec  
 DE 7.50 usec  
 TE 300.0 K  
 DI 1.00000000 sec

==== CHANNEL f1 =====  
 NUC1 1H  
 P1 9.00 usec  
 PL1 0.00 dB  
 SFO1 400.2024714 MHz

F2 - Processing parameters  
 SI 32768  
 SF 400.2000028 MHz  
 WDW EM  
 SSB 0  
 LB 0.30 Hz  
 GB 0  
 PC 1.00

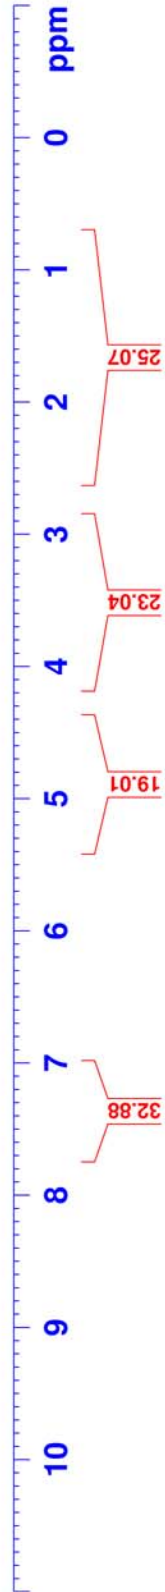

Instrument DQX400  
 Chemist kjd  
 Group bgd  
 kjd16-14p  
 c13acq.au CDCI3 {C:NMR} bgdgrp 22

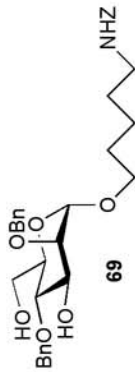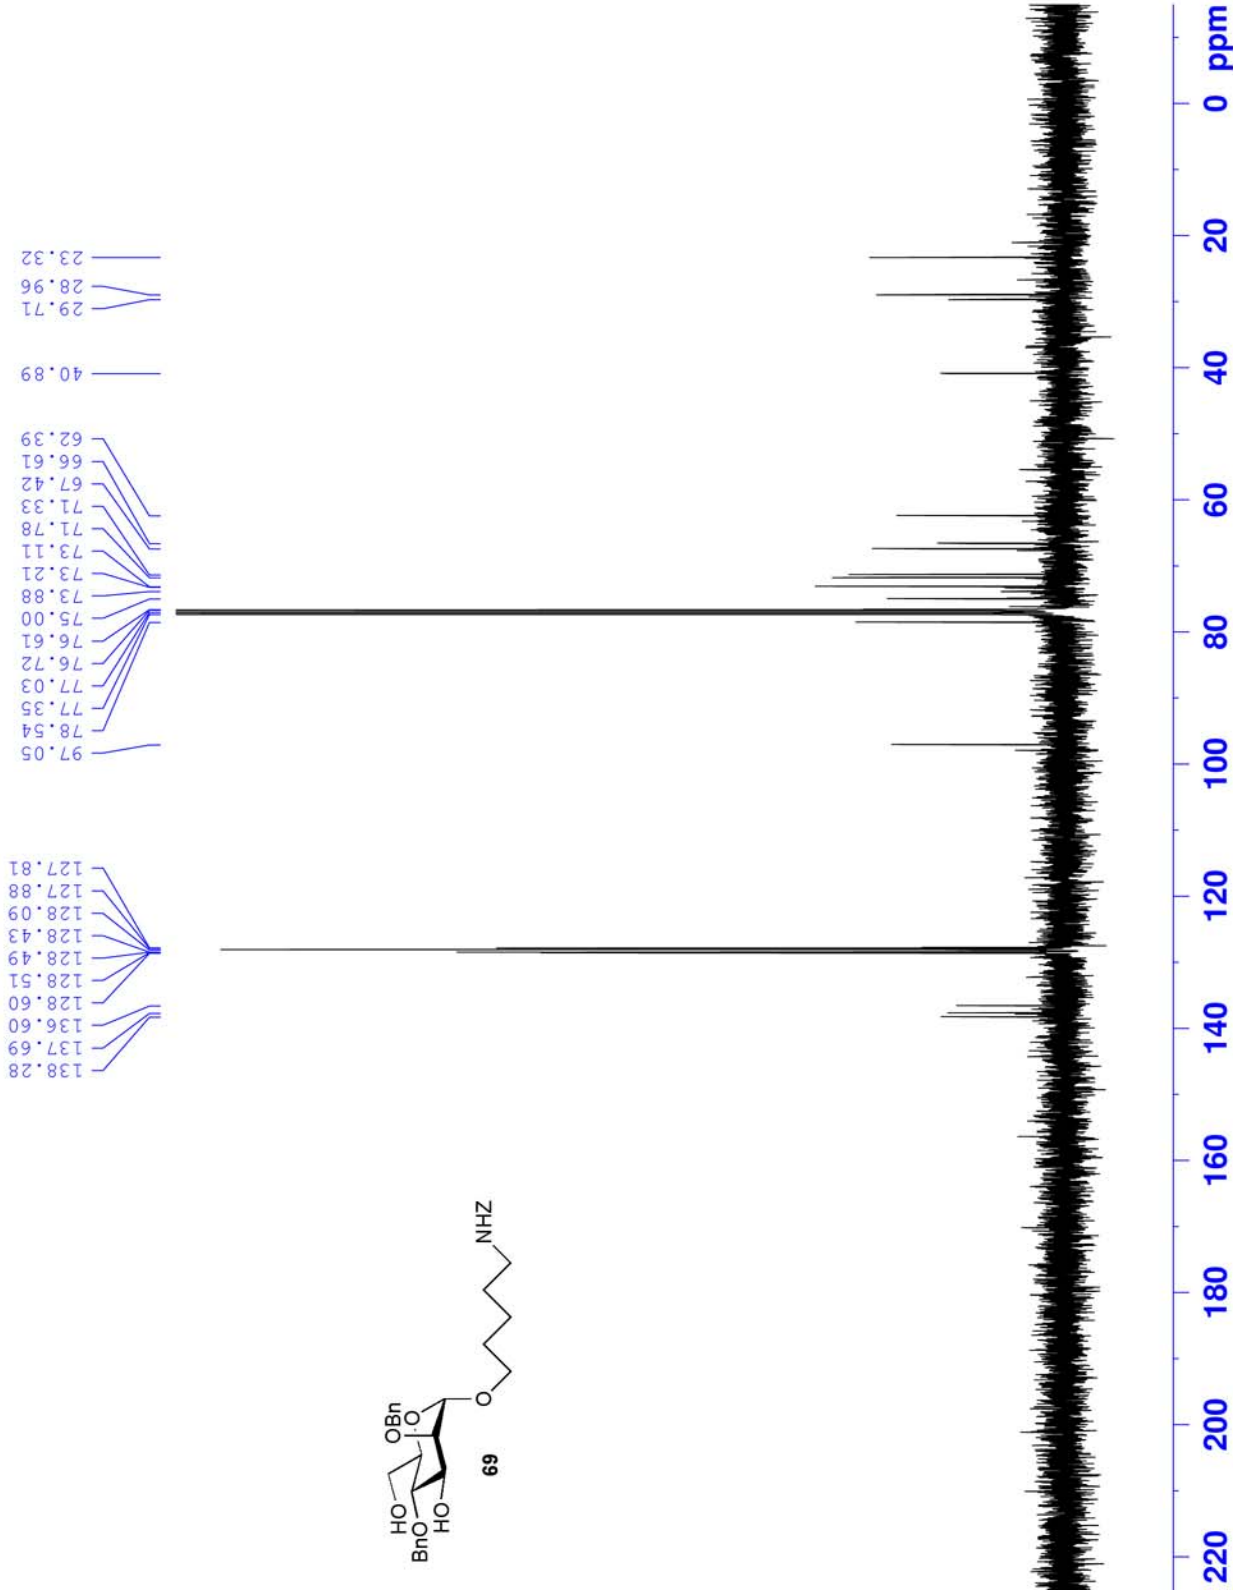

Current Data Parameters  
 NAME Feb27-2008-22  
 EXPNO 4  
 PROCNO 1

F2 - Acquisition Parameters  
 Date\_ 20080228  
 Time 1.29  
 INSTRUM av400  
 PROBHD 5 mm QNP 1H/13  
 PULPROG zgpg30  
 TD 32768  
 SOLVENT CDCl3  
 NS 256  
 DS 4  
 SWH 26178.010 Hz  
 FIDRES 0.798889 Hz  
 AQ 0.6259188 sec  
 RG 32768  
 DW 19.100 usec  
 DE 7.50 usec  
 TE 300.0 K  
 D1 1.00000000 sec  
 d11 0.03000000 sec  
 DELTA 0.89999998 sec  
 TD0 1

==== CHANNEL f1 =====  
 NUC1 13C  
 P1 9.50 usec  
 PL1 0.00 dB  
 SFO1 100.6403931 MHz

==== CHANNEL f2 =====  
 CPDPRG2 waltz16  
 NUC2 1H  
 PCPD2 80.00 usec  
 PL12 19.00 dB  
 PL13 25.00 dB  
 PL2 0.00 dB  
 SFO2 400.2016008 MHz

F2 - Processing parameters  
 SI 32768  
 SF 100.6303718 MHz  
 WDW EM  
 SSB 0  
 LB 1.00 Hz  
 GB 0  
 PC 1.40
